# Supplementary material for: Structural Landscape and Deduced Functions of The Cardiac 14-3-3 Protein Interactome
Source: Preprints.org preprint supplement (doi:10.20944/preprints202208.0343.v1), 2022-08-18
Supplement: Supplementary file 7 [file tab3_interactome.xlsx]

## Sheet: Proteins
			Control_1	Control_2	Control_3	Control_4	14-3-3_1	14-3-3_2	14-3-3_3	14-3-3_4	Control-1	Control-2	Control-3	Control-4	14-3-3_1	14-3-3_2	14-3-3_3	14-3-3_4	Control-1	Control-2	Control-3	Control-4	14-3-3_1	14-3-3_2	14-3-3_3	14-3-3_4		Control-1	Control-2	Control-3	Control-4	14-3-3_1	14-3-3_2	14-3-3_3	14-3-3_4
Identified Proteins (912)	Accession Number	Molecular Weight	52753 SpC	52754 SpC	52755 SpC	52756 SpC	52757 SpC	52758 SpC	52759 SpC	52760 SpC	52753 SAF	52754 SAF	52755 SAF	52756 SAF	52757 SAF	52758 SAF	52759 SAF	52760 SAF	52753 NSAF	52754 NSAF	52755 NSAF	52756 NSAF	52757 NSAF	52758 NSAF	52759 NSAF	52760 NSAF		52753 SUM SAF	52754 SUM SAF	52755 SUM SAF	52756 SUM SAF	52757 SUM SAF	52758 SUM SAF	52759 SUM SAF	52760 SUM SAF
Ig gamma-1 chain C region secreted form OS=Mus musculus OX=10090 GN=Ighg1 PE=1 SV=1	sp|P01868|IGHG1_MOUSE	36	662	1158	1300	1280	656	1032	1074	1073	18.3889	32.1667	36.1111	35.5556	18.2222	28.6667	29.8333	29.8056	0.066719	0.0828457	0.0869162	0.0970074	0.0496305	0.0636109	0.0606749	0.0592748		275.617	388.272	415.47	366.524	367.158	450.656	491.691	502.837
Immunoglobulin kappa constant OS=Mus musculus OX=10090 GN=Igkc PE=1 SV=2	sp|P01837|IGKC_MOUSE	12	384	711	886	790	395	651	707	742	32	59.25	73.8333	65.8333	32.9167	54.25	58.9167	61.8333	0.116103	0.152599	0.17771	0.179615	0.0896526	0.12038	0.119825	0.122969
Myosin-6 OS=Mus musculus OX=10090 GN=Myh6 PE=1 SV=2	sp|Q02566|MYH6_MOUSE	224	268	537	216	338	379	338	155	435	1.19643	2.39732	0.964286	1.50893	1.69196	1.50893	0.691964	1.94196	0.00434091	0.00617433	0.00232095	0.00411686	0.00460827	0.00334829	0.00140731	0.00386202
Stress-70 protein, mitochondrial OS=Mus musculus OX=10090 GN=Hspa9 PE=1 SV=3	sp|P38647|GRP75_MOUSE	73	256	305	413	319	280	292	345	335	3.50685	4.17808	5.65753	4.36986	3.83562	4	4.72603	4.58904	0.0127236	0.0107607	0.0136172	0.0119224	0.0104468	0.00887594	0.00961178	0.0091263
ATP synthase subunit alpha, mitochondrial OS=Mus musculus OX=10090 GN=Atp5f1a PE=1 SV=1	sp|Q03265|ATPA_MOUSE	60	223	251	266	232	295	329	379	361	3.71667	4.18333	4.43333	3.86667	4.91667	5.48333	6.31667	6.01667	0.0134849	0.0107742	0.0106706	0.0105496	0.0133911	0.0121674	0.0128468	0.0119654
Desmoplakin OS=Mus musculus OX=10090 GN=Dsp PE=1 SV=1	sp|E9Q557|DESP_MOUSE	333	370	239	355	320	284	261	200	90	1.11111	0.717718	1.06607	0.960961	0.852853	0.783784	0.600601	0.27027	0.00403136	0.00184849	0.00256593	0.00262182	0.00232285	0.0017392	0.0012215	0.000537491
Sarcoplasmic/endoplasmic reticulum calcium ATPase 2 OS=Mus musculus OX=10090 GN=Atp2a2 PE=1 SV=2	sp|O55143|AT2A2_MOUSE	115	122	195	246	198	235	273	300	298	1.06087	1.69565	2.13913	1.72174	2.04348	2.37391	2.6087	2.5913	0.00384907	0.00436718	0.0051487	0.00469748	0.00556567	0.00526768	0.00530556	0.00515337
Myosin-9 OS=Mus musculus OX=10090 GN=Myh9 PE=1 SV=4	sp|Q8VDD5|MYH9_MOUSE	226	178	338	132	230	319	197	114	314	0.787611	1.49558	0.584071	1.0177	1.4115	0.871681	0.504425	1.38938	0.00285763	0.00385187	0.00140581	0.00277662	0.00384441	0.00193425	0.0010259	0.00276308
Myosin-7 OS=Mus musculus OX=10090 GN=Myh7 PE=2 SV=1	sp|Q91Z83|MYH7_MOUSE	223	0	179	0	0	135	0	0	0	0	0.802691	0	0	0.605381	0	0	0	0	0.00206734	0	0	0.00164883	0	0	0
ADP/ATP translocase 1 OS=Mus musculus OX=10090 GN=Slc25a4 PE=1 SV=4	sp|P48962|ADT1_MOUSE	33	141	169	209	162	194	235	293	247	4.27273	5.12121	6.33333	4.90909	5.87879	7.12121	8.87879	7.48485	0.0155024	0.0131898	0.0152438	0.0133936	0.0160116	0.0158019	0.0180577	0.0148852
ATP synthase subunit beta, mitochondrial OS=Mus musculus OX=10090 GN=Atp5f1b PE=1 SV=2	sp|P56480|ATPB_MOUSE	56	132	166	179	152	197	229	267	245	2.35714	2.96429	3.19643	2.71429	3.51786	4.08929	4.76786	4.375	0.00855224	0.00763456	0.00769352	0.00740548	0.00958132	0.00907406	0.00969685	0.00870064
Endoplasmic reticulum chaperone BiP OS=Mus musculus OX=10090 GN=Hspa5 PE=1 SV=3	sp|P20029|BIP_MOUSE	72	138	201	250	186	151	155	193	177	1.91667	2.79167	3.47222	2.58333	2.09722	2.15278	2.68056	2.45833	0.0069541	0.00718998	0.00835733	0.00704819	0.00571204	0.00477698	0.00545171	0.00488893
Myosin-11 OS=Mus musculus OX=10090 GN=Myh11 PE=1 SV=1	sp|O08638|MYH11_MOUSE	227	131	259	93	149	213	142	61	204	0.577093	1.14097	0.409692	0.656388	0.938326	0.625551	0.268722	0.898678	0.00209382	0.00293858	0.000986091	0.00179084	0.00255565	0.00138809	0.000546527	0.00178722
Actin, alpha cardiac muscle 1 OS=Mus musculus OX=10090 GN=Actc1 PE=1 SV=1	sp|P68033|ACTC_MOUSE	42	148	195	110	137	180	161	144	197	3.52381	4.64286	2.61905	3.2619	4.28571	3.83333	3.42857	4.69048	0.0127852	0.0119577	0.00630381	0.00889956	0.0116727	0.00850611	0.00697302	0.00932803
Aconitate hydratase, mitochondrial OS=Mus musculus OX=10090 GN=Aco2 PE=1 SV=1	sp|Q99KI0|ACON_MOUSE	85	101	139	162	131	148	171	195	172	1.18824	1.63529	1.90588	1.54118	1.74118	2.01176	2.29412	2.02353	0.00431119	0.00421172	0.00458729	0.00420484	0.00474231	0.00446408	0.00466577	0.00402423
3-ketoacyl-CoA thiolase, mitochondrial OS=Mus musculus OX=10090 GN=Acaa2 PE=1 SV=3	sp|Q8BWT1|THIM_MOUSE	42	108	151	139	127	146	171	200	175	2.57143	3.59524	3.30952	3.02381	3.47619	4.07143	4.7619	4.16667	0.00932972	0.00925959	0.00796573	0.00824996	0.00946783	0.00903444	0.00968475	0.00828632
Actin, cytoplasmic 1 OS=Mus musculus OX=10090 GN=Actb PE=1 SV=1	sp|P60710|ACTB_MOUSE	42	150	148	58	103	123	101	43	122	3.57143	3.52381	1.38095	2.45238	2.92857	2.40476	1.02381	2.90476	0.0129579	0.00907562	0.00332383	0.00669091	0.00797633	0.00533613	0.00208222	0.00577675
Succinate dehydrogenase [ubiquinone] flavoprotein subunit, mitochondrial OS=Mus musculus OX=10090 GN=Sdha PE=1 SV=1	sp|Q8K2B3|SDHA_MOUSE	73	70	118	134	130	164	168	202	199	0.958904	1.61644	1.83562	1.78082	2.24658	2.30137	2.76712	2.72603	0.00347912	0.00416316	0.00441817	0.00485868	0.00611883	0.00510671	0.00562777	0.0054213
Trifunctional enzyme subunit alpha, mitochondrial OS=Mus musculus OX=10090 GN=Hadha PE=1 SV=1	sp|Q8BMS1|ECHA_MOUSE	83	91	125	151	125	139	149	183	178	1.09639	1.50602	1.81928	1.50602	1.6747	1.79518	2.20482	2.14458	0.00397793	0.00387879	0.00437884	0.00410894	0.00456125	0.00398348	0.00448415	0.00426496
Glycogen phosphorylase, muscle form OS=Mus musculus OX=10090 GN=Pygm PE=1 SV=3	sp|Q9WUB3|PYGM_MOUSE	97	57	91	97	96	137	175	208	214	0.587629	0.938144	1	0.989691	1.41237	1.80412	2.14433	2.20619	0.00213205	0.0024162	0.00240691	0.00270021	0.00384677	0.00400332	0.00436113	0.00438748
Heat shock cognate 71 kDa protein OS=Mus musculus OX=10090 GN=Hspa8 PE=1 SV=1	sp|P63017|HSP7C_MOUSE	71	105	129	157	133	112	111	117	155	1.47887	1.8169	2.21127	1.87324	1.57746	1.56338	1.64789	2.1831	0.00536569	0.00467945	0.00532232	0.00511082	0.00429642	0.00346912	0.00335147	0.00434157
Junction plakoglobin OS=Mus musculus OX=10090 GN=Jup PE=1 SV=3	sp|Q02257|PLAK_MOUSE	82	141	124	168	171	159	145	104	63	1.71951	1.5122	2.04878	2.08537	1.93902	1.76829	1.26829	0.768293	0.00623878	0.00389468	0.00493123	0.00568957	0.00528117	0.00392382	0.00257945	0.00152792
Isocitrate dehydrogenase [NADP], mitochondrial OS=Mus musculus OX=10090 GN=Idh2 PE=1 SV=3	sp|P54071|IDHP_MOUSE	51	58	80	115	78	117	125	159	152	1.13725	1.56863	2.2549	1.52941	2.29412	2.45098	3.11765	2.98039	0.00412622	0.00404002	0.00542735	0.00417275	0.00624831	0.00543869	0.00634066	0.00592716
Glyceraldehyde-3-phosphate dehydrogenase OS=Mus musculus OX=10090 GN=Gapdh PE=1 SV=2	sp|P16858|G3P_MOUSE	36	98	105	116	110	119	124	142	133	2.72222	2.91667	3.22222	3.05556	3.30556	3.44444	3.94444	3.69444	0.00987684	0.00751192	0.0077556	0.00833657	0.00900309	0.00764317	0.0080222	0.0073472
14-3-3 protein beta/alpha OS=Mus musculus OX=10090 GN=Ywhab PE=1 SV=3	sp|Q9CQV8|1433B_MOUSE	28	14	9	9	12	162	258	277	290	0.5	0.321429	0.321429	0.428571	5.78571	9.21429	9.89286	10.3571	0.00181411	0.000827844	0.00077365	0.00116929	0.0157581	0.0204464	0.0201201	0.0205974
ADP/ATP translocase 2 OS=Mus musculus OX=10090 GN=Slc25a5 PE=1 SV=3	sp|P51881|ADT2_MOUSE	33	46	60	76	37	87	95	145	137	1.39394	1.81818	2.30303	1.12121	2.63636	2.87879	4.39394	4.15152	0.00505753	0.00468275	0.00554319	0.00305904	0.00718046	0.00638799	0.00893638	0.00825619
Keratin, type II cytoskeletal 2 oral OS=Mus musculus OX=10090 GN=Krt76 PE=1 SV=1	sp|Q3UV17|K22O_MOUSE	63	91	80	93	42	75	60	7	0	1.44444	1.26984	1.47619	0.666667	1.19048	0.952381	0.111111	0	0.00524077	0.00327049	0.00355306	0.00181889	0.00324241	0.00211332	0.000225977	0
2-oxoglutarate dehydrogenase, mitochondrial OS=Mus musculus OX=10090 GN=Ogdh PE=1 SV=3	sp|Q60597|ODO1_MOUSE	116	45	76	123	81	109	144	187	193	0.387931	0.655172	1.06034	0.698276	0.939655	1.24138	1.61207	1.66379	0.0014075	0.00168741	0.00255216	0.00190513	0.00255927	0.0027546	0.00327862	0.00330881
von Willebrand factor A domain-containing protein 8 OS=Mus musculus OX=10090 GN=Vwa8 PE=1 SV=2	sp|Q8CC88|VWA8_MOUSE	213	15	23	42	35	125	252	244	221	0.0704225	0.107981	0.197183	0.164319	0.586854	1.1831	1.14554	1.03756	0.000255509	0.000278107	0.000474602	0.000448318	0.00159837	0.00262528	0.0023298	0.00206341
Very long-chain specific acyl-CoA dehydrogenase, mitochondrial OS=Mus musculus OX=10090 GN=Acadvl PE=1 SV=3	sp|P50544|ACADV_MOUSE	71	59	81	103	117	129	138	147	148	0.830986	1.14085	1.4507	1.64789	1.8169	1.94366	2.07042	2.08451	0.003015	0.00293826	0.00349172	0.00449599	0.00494856	0.00431296	0.00421082	0.00414549
Trifunctional enzyme subunit beta, mitochondrial OS=Mus musculus OX=10090 GN=Hadhb PE=1 SV=1	sp|Q99JY0|ECHB_MOUSE	51	66	91	108	98	113	121	144	135	1.29412	1.78431	2.11765	1.92157	2.21569	2.37255	2.82353	2.64706	0.00469535	0.00459552	0.00509699	0.00524268	0.0060347	0.00526465	0.00574249	0.00526425
Cytochrome b-c1 complex subunit 2, mitochondrial OS=Mus musculus OX=10090 GN=Uqcrc2 PE=1 SV=1	sp|Q9DB77|QCR2_MOUSE	48	74	90	104	74	112	117	156	145	1.54167	1.875	2.16667	1.54167	2.33333	2.4375	3.25	3.02083	0.00559351	0.00482909	0.00521497	0.00420618	0.00635512	0.00540878	0.00660984	0.00600758
Spectrin alpha chain, erythrocytic 1 OS=Mus musculus OX=10090 GN=Spta1 PE=1 SV=3	sp|P08032|SPTA1_MOUSE	280	113	144	78	110	186	73	39	70	0.403571	0.514286	0.278571	0.392857	0.664286	0.260714	0.139286	0.25	0.00146425	0.00132455	0.000670497	0.00107185	0.00180926	0.000578521	0.000283279	0.000497179
MICOS complex subunit Mic60 OS=Mus musculus OX=10090 GN=Immt PE=1 SV=1	sp|Q8CAQ8|MIC60_MOUSE	84	43	92	109	73	97	115	143	135	0.511905	1.09524	1.29762	0.869048	1.15476	1.36905	1.70238	1.60714	0.00185731	0.0028208	0.00312325	0.00237105	0.00314514	0.0030379	0.0034623	0.00319615
Ig gamma-3 chain C region OS=Mus musculus OX=10090 PE=1 SV=2	sp|P03987|IGHG3_MOUSE	44	52	110	135	146	56	88	116	135	1.18182	2.5	3.06818	3.31818	1.27273	2	2.63636	3.06818	0.0042879	0.00643878	0.00738484	0.00905311	0.00346643	0.00443797	0.00536183	0.00610175
General transcription factor II-I OS=Mus musculus OX=10090 GN=Gtf2i PE=1 SV=3	sp|Q9ESZ8|GTF2I_MOUSE	112	69	105	120	98	82	86	107	97	0.616071	0.9375	1.07143	0.875	0.732143	0.767857	0.955357	0.866071	0.00223525	0.00241454	0.00257883	0.00238729	0.00199408	0.00170386	0.001943	0.00172237
Spectrin beta chain, erythrocytic OS=Mus musculus OX=10090 GN=Sptb PE=1 SV=4	sp|P15508|SPTB1_MOUSE	245	81	132	54	100	153	55	51	131	0.330612	0.538776	0.220408	0.408163	0.62449	0.22449	0.208163	0.534694	0.00119954	0.00138762	0.000530503	0.00111361	0.00170088	0.00049814	0.000423362	0.00106335
Myoglobin OS=Mus musculus OX=10090 GN=Mb PE=1 SV=3	sp|P04247|MYG_MOUSE	17	59	77	88	80	87	116	117	114	3.47059	4.52941	5.17647	4.70588	5.11765	6.82353	6.88235	6.70588	0.0125921	0.0116656	0.0124593	0.0128392	0.0139385	0.0151413	0.0139973	0.0133361
Myosin-10 OS=Mus musculus OX=10090 GN=Myh10 PE=1 SV=2	sp|Q61879|MYH10_MOUSE	229	60	122	44	68	126	56	42	100	0.262009	0.532751	0.19214	0.296943	0.550218	0.244541	0.183406	0.436681	0.000950627	0.00137211	0.000462463	0.00081016	0.00149859	0.000542634	0.000373011	0.000868435
Vimentin OS=Mus musculus OX=10090 GN=Vim PE=1 SV=3	sp|P20152|VIME_MOUSE	54	22	47	13	32	122	170	135	175	0.407407	0.87037	0.240741	0.592593	2.25926	3.14815	2.5	3.24074	0.00147817	0.00224165	0.000579442	0.00161679	0.00615337	0.00698569	0.00508449	0.00644492
Single-stranded DNA-binding protein, mitochondrial OS=Mus musculus OX=10090 GN=Ssbp1 PE=1 SV=1	sp|Q9CYR0|SSBP_MOUSE	17	61	97	91	80	72	97	90	77	3.58824	5.70588	5.35294	4.70588	4.23529	5.70588	5.29412	4.52941	0.0130189	0.0146956	0.0128841	0.0128392	0.0115353	0.0126613	0.0107672	0.00900772
Creatine kinase S-type, mitochondrial OS=Mus musculus OX=10090 GN=Ckmt2 PE=1 SV=1	sp|Q6P8J7|KCRS_MOUSE	47	62	63	68	62	91	73	97	83	1.31915	1.34043	1.44681	1.31915	1.93617	1.55319	2.06383	1.76596	0.00478617	0.00345228	0.00348234	0.00359908	0.0052734	0.00344651	0.00419741	0.00351199
ATP synthase subunit O, mitochondrial OS=Mus musculus OX=10090 GN=Atp5po PE=1 SV=1	sp|Q9DB20|ATPO_MOUSE	23	57	74	76	97	82	94	111	110	2.47826	3.21739	3.30435	4.21739	3.56522	4.08696	4.82609	4.78261	0.00899169	0.00828644	0.00795327	0.0115064	0.00971031	0.0090689	0.00981528	0.00951125
Myosin-binding protein C, cardiac-type OS=Mus musculus OX=10090 GN=Mybpc3 PE=1 SV=1	sp|O70468|MYPC3_MOUSE	141	51	72	87	70	83	84	100	108	0.361702	0.510638	0.617021	0.496454	0.588652	0.595745	0.70922	0.765957	0.00131234	0.00131516	0.00148512	0.00135449	0.00160327	0.00132195	0.00144241	0.00152327
Spectrin beta chain, non-erythrocytic 1 OS=Mus musculus OX=10090 GN=Sptbn1 PE=1 SV=2	sp|Q62261|SPTB2_MOUSE	274	60	116	46	81	123	52	43	89	0.218978	0.423358	0.167883	0.29562	0.448905	0.189781	0.156934	0.324818	0.000794502	0.00109036	0.00040408	0.000806551	0.00122265	0.000421121	0.000319172	0.00064597
Glycogen phosphorylase, brain form OS=Mus musculus OX=10090 GN=Pygb PE=1 SV=3	sp|Q8CI94|PYGB_MOUSE	97	47	55	67	62	74	84	105	118	0.484536	0.56701	0.690722	0.639175	0.762887	0.865979	1.08247	1.21649	0.00175801	0.00146034	0.00166251	0.00174388	0.00207782	0.0019216	0.00220153	0.00241926
ATP synthase subunit gamma, mitochondrial OS=Mus musculus OX=10090 GN=Atp5f1c PE=1 SV=1	sp|Q91VR2|ATPG_MOUSE	33	67	76	74	64	73	83	98	85	2.0303	2.30303	2.24242	1.93939	2.21212	2.51515	2.9697	2.57576	0.0073664	0.00593149	0.00539732	0.00529131	0.00602499	0.00558108	0.00603976	0.00512245
NADH-ubiquinone oxidoreductase 75 kDa subunit, mitochondrial OS=Mus musculus OX=10090 GN=Ndufs1 PE=1 SV=2	sp|Q91VD9|NDUS1_MOUSE	80	39	74	81	65	82	99	99	90	0.4875	0.925	1.0125	0.8125	1.025	1.2375	1.2375	1.125	0.00176876	0.00238235	0.002437	0.00221677	0.00279171	0.00274599	0.00251682	0.00223731
Cysteine and glycine-rich protein 3 OS=Mus musculus OX=10090 GN=Csrp3 PE=1 SV=1	sp|P50462|CSRP3_MOUSE	21	57	78	88	76	69	89	94	95	2.71429	3.71429	4.19048	3.61905	3.28571	4.2381	4.47619	4.52381	0.00984804	0.00956619	0.0100861	0.00987397	0.00894905	0.00940427	0.00910366	0.00899658
Spectrin alpha chain, non-erythrocytic 1 OS=Mus musculus OX=10090 GN=Sptan1 PE=1 SV=4	sp|P16546|SPTN1_MOUSE	285	64	108	57	84	122	61	33	55	0.224561	0.378947	0.2	0.294737	0.42807	0.214035	0.115789	0.192982	0.000814759	0.000975984	0.000481382	0.00080414	0.0011659	0.000474941	0.000235492	0.000383787
Myosin-4 OS=Mus musculus OX=10090 GN=Myh4 PE=2 SV=1	sp|Q5SX39|MYH4_MOUSE	223	46	56	48	24	75	0	0	0	0.206278	0.251121	0.215247	0.107623	0.336323	0	0	0	0.000748423	0.000646766	0.000518079	0.000293632	0.000916017	0	0	0
Carnitine O-palmitoyltransferase 1, muscle isoform OS=Mus musculus OX=10090 GN=Cpt1b PE=1 SV=1	sp|Q924X2|CPT1B_MOUSE	88	33	55	72	50	65	76	99	94	0.375	0.625	0.818182	0.568182	0.738636	0.863636	1.125	1.06818	0.00136058	0.0016097	0.00196929	0.00155019	0.00201177	0.0019164	0.00228802	0.00212431
Phosphate carrier protein, mitochondrial OS=Mus musculus OX=10090 GN=Slc25a3 PE=1 SV=1	sp|Q8VEM8|MPCP_MOUSE	40	42	50	69	46	65	79	95	87	1.05	1.25	1.725	1.15	1.625	1.975	2.375	2.175	0.00380964	0.00321939	0.00415192	0.00313758	0.00442589	0.0043825	0.00483027	0.00432546
14-3-3 protein theta OS=Mus musculus OX=10090 GN=Ywhaq PE=1 SV=1	sp|P68254|1433T_MOUSE	28	0	0	0	6	30	102	124	139	0	0	0	0.214286	1.07143	3.64286	4.42857	4.96429	0	0	0	0.000584643	0.00291817	0.00808345	0.00900681	0.00987256
Acyl-coenzyme A thioesterase 13 OS=Mus musculus OX=10090 GN=Acot13 PE=1 SV=1	sp|Q9CQR4|ACO13_MOUSE	15	44	52	58	55	47	64	48	47	2.93333	3.46667	3.86667	3.66667	3.13333	4.26667	3.2	3.13333	0.0106428	0.00892845	0.00930672	0.0100039	0.00853402	0.00946767	0.00650815	0.00623131
Succinate--CoA ligase [ADP/GDP-forming] subunit alpha, mitochondrial OS=Mus musculus OX=10090 GN=Suclg1 PE=1 SV=4	sp|Q9WUM5|SUCA_MOUSE	36	46	52	75	48	66	69	86	77	1.27778	1.44444	2.08333	1.33333	1.83333	1.91667	2.38889	2.13889	0.00463607	0.00372019	0.0050144	0.00363778	0.00499331	0.00425305	0.00485851	0.00425364
Immunoglobulin heavy constant mu OS=Mus musculus OX=10090 GN=Ighm PE=1 SV=2	sp|P01872|IGHM_MOUSE	50	34	58	69	64	42	57	74	63	0.68	1.16	1.38	1.28	0.84	1.14	1.48	1.26	0.00246719	0.0029876	0.00332154	0.00349227	0.00228784	0.00252964	0.00301002	0.00250578
ATP-dependent 6-phosphofructokinase, muscle type OS=Mus musculus OX=10090 GN=Pfkm PE=1 SV=3	sp|P47857|PFKAM_MOUSE	85	25	40	66	47	54	59	74	71	0.294118	0.470588	0.776471	0.552941	0.635294	0.694118	0.870588	0.835294	0.00106713	0.00121201	0.0018689	0.00150861	0.0017303	0.00154024	0.0017706	0.00166116
Elongation factor 1-alpha 2 OS=Mus musculus OX=10090 GN=Eef1a2 PE=1 SV=1	sp|P62631|EF1A2_MOUSE	50	58	61	59	56	61	60	69	67	1.16	1.22	1.18	1.12	1.22	1.2	1.38	1.34	0.00420874	0.00314213	0.00284015	0.00305573	0.00332282	0.00266278	0.00280664	0.00266488
Beta-enolase OS=Mus musculus OX=10090 GN=Eno3 PE=1 SV=3	sp|P21550|ENOB_MOUSE	47	29	32	54	35	51	57	63	60	0.617021	0.680851	1.14894	0.744681	1.08511	1.21277	1.34043	1.2766	0.00223869	0.00175354	0.00276539	0.00203174	0.00295542	0.00269111	0.00272615	0.00253879
Ig gamma-2A chain C region secreted form OS=Mus musculus OX=10090 PE=1 SV=1	sp|P01864|GCAB_MOUSE	37	30	79	66	54	39	71	68	60	0.810811	2.13514	1.78378	1.45946	1.05405	1.91892	1.83784	1.62162	0.0029418	0.00549907	0.00429341	0.00398189	0.00287085	0.00425805	0.00373779	0.00322495
Keratin, type II cytoskeletal 74 OS=Mus musculus OX=10090 GN=Krt74 PE=3 SV=1	sp|Q6IFZ9|K2C74_MOUSE	55	0	0	11	0	0	0	0	0	0	0	0.2	0	0	0	0	0	0	0	0.000481382	0	0	0	0	0
Elongation factor Tu, mitochondrial OS=Mus musculus OX=10090 GN=Tufm PE=1 SV=1	sp|Q8BFR5|EFTU_MOUSE	50	32	37	56	42	73	72	93	76	0.64	0.74	1.12	0.84	1.46	1.44	1.86	1.52	0.00232206	0.00190588	0.00269574	0.0022918	0.00397649	0.00319534	0.00378286	0.00302285
Ig gamma-2B chain C region OS=Mus musculus OX=10090 GN=Igh-3 PE=1 SV=3	sp|P01867|IGG2B_MOUSE	44	30	73	66	65	23	60	62	57	0.681818	1.65909	1.5	1.47727	0.522727	1.36364	1.40909	1.29545	0.00247379	0.00427301	0.00361037	0.00403049	0.00142371	0.00302589	0.0028658	0.00257629
Acetyl-CoA acetyltransferase, mitochondrial OS=Mus musculus OX=10090 GN=Acat1 PE=1 SV=1	sp|Q8QZT1|THIL_MOUSE	45	52	47	50	34	59	51	71	58	1.15556	1.04444	1.11111	0.755556	1.31111	1.13333	1.57778	1.28889	0.00419262	0.00268998	0.00267435	0.00206141	0.00357097	0.00251485	0.00320888	0.00256324
ATP synthase F(0) complex subunit B1, mitochondrial OS=Mus musculus OX=10090 GN=Atp5pb PE=1 SV=1	sp|Q9CQQ7|AT5F1_MOUSE	29	39	42	53	38	58	67	81	74	1.34483	1.44828	1.82759	1.31034	2	2.31034	2.7931	2.55172	0.00487934	0.00373005	0.00439884	0.00357506	0.00544725	0.00512662	0.0056806	0.00507466
Cytochrome b-c1 complex subunit Rieske, mitochondrial OS=Mus musculus OX=10090 GN=Uqcrfs1 PE=1 SV=1	sp|Q9CR68|UCRI_MOUSE	29	35	49	49	34	52	67	75	70	1.2069	1.68966	1.68966	1.17241	1.7931	2.31034	2.58621	2.41379	0.00437889	0.00435173	0.00406685	0.00319874	0.00488374	0.00512662	0.00525982	0.00480035
Nascent polypeptide-associated complex subunit alpha, muscle-specific form OS=Mus musculus OX=10090 GN=Naca PE=1 SV=2	sp|P70670|NACAM_MOUSE	220	33	62	42	62	77	37	48	80	0.15	0.281818	0.190909	0.281818	0.35	0.168182	0.218182	0.363636	0.000544234	0.000725827	0.000459501	0.000768894	0.000953268	0.000373193	0.000443737	0.00072317
Medium-chain specific acyl-CoA dehydrogenase, mitochondrial OS=Mus musculus OX=10090 GN=Acadm PE=1 SV=1	sp|P45952|ACADM_MOUSE	46	36	44	48	39	51	57	72	73	0.782609	0.956522	1.04348	0.847826	1.1087	1.23913	1.56522	1.58696	0.00283948	0.00246354	0.00251156	0.00231315	0.00301967	0.00274961	0.00318333	0.00315601
14-3-3 protein zeta/delta OS=Mus musculus OX=10090 GN=Ywhaz PE=1 SV=1	sp|P63101|1433Z_MOUSE	28	22	11	11	17	27	32	35	46	0.785714	0.392857	0.392857	0.607143	0.964286	1.14286	1.25	1.64286	0.00285075	0.00101181	0.000945572	0.00165649	0.00262635	0.00253598	0.00254225	0.00326718
Golgin subfamily A member 4 OS=Mus musculus OX=10090 GN=Golga4 PE=1 SV=2	sp|Q91VW5|GOGA4_MOUSE	258	2	90	107	103	0	39	45	32	0.00775194	0.348837	0.414729	0.399225	0	0.151163	0.174419	0.124031	2.81258e-05	0.000898435	0.000998215	0.00108922	0	0.000335428	0.000354732	0.000246663
Pyruvate dehydrogenase E1 component subunit alpha, somatic form, mitochondrial OS=Mus musculus OX=10090 GN=Pdha1 PE=1 SV=1	sp|P35486|ODPA_MOUSE	43	43	51	48	39	54	53	62	58	1	1.18605	1.11628	0.906977	1.25581	1.23256	1.44186	1.34884	0.00362823	0.00305468	0.00268678	0.00247453	0.00342036	0.00273503	0.00293245	0.00268246
Heat shock-related 70 kDa protein 2 OS=Mus musculus OX=10090 GN=Hspa2 PE=1 SV=2	sp|P17156|HSP72_MOUSE	70	28	0	0	33	0	0	0	0	0.4	0	0	0.471429	0	0	0	0	0.00145129	0	0	0.00128621	0	0	0	0
Succinate dehydrogenase [ubiquinone] iron-sulfur subunit, mitochondrial OS=Mus musculus OX=10090 GN=Sdhb PE=1 SV=1	sp|Q9CQA3|SDHB_MOUSE	32	32	40	42	42	47	52	59	52	1	1.25	1.3125	1.3125	1.46875	1.625	1.84375	1.625	0.00362823	0.00321939	0.00315907	0.00358094	0.00400032	0.00360585	0.00374981	0.00323166
Progranulin OS=Mus musculus OX=10090 GN=Grn PE=1 SV=2	sp|P28798|GRN_MOUSE	63	17	68	93	81	19	36	35	45	0.269841	1.07937	1.47619	1.28571	0.301587	0.571429	0.555556	0.714286	0.000979045	0.00277992	0.00355306	0.00350786	0.00082141	0.00126799	0.00112989	0.00142051
Hemoglobin subunit alpha OS=Mus musculus OX=10090 GN=Hba PE=1 SV=2	sp|P01942|HBA_MOUSE	15	27	43	52	40	45	53	75	68	1.8	2.86667	3.46667	2.66667	3	3.53333	5	4.53333	0.00653081	0.00738314	0.00834396	0.00727556	0.00817087	0.00784041	0.010169	0.00901552
Long-chain-fatty-acid--CoA ligase 1 OS=Mus musculus OX=10090 GN=Acsl1 PE=1 SV=2	sp|P41216|ACSL1_MOUSE	78	15	40	53	40	55	60	68	70	0.192308	0.512821	0.679487	0.512821	0.705128	0.769231	0.871795	0.897436	0.000697736	0.00132078	0.00163547	0.00139915	0.0019205	0.00170691	0.00177305	0.00178475
Succinate--CoA ligase [ADP-forming] subunit beta, mitochondrial OS=Mus musculus OX=10090 GN=Sucla2 PE=1 SV=2	sp|Q9Z2I9|SUCB1_MOUSE	50	28	32	40	41	47	55	65	58	0.56	0.64	0.8	0.82	0.94	1.1	1.3	1.16	0.00203181	0.00164833	0.00192553	0.00223723	0.00256021	0.00244088	0.00264394	0.00230691
Long-chain specific acyl-CoA dehydrogenase, mitochondrial OS=Mus musculus OX=10090 GN=Acadl PE=1 SV=2	sp|P51174|ACADL_MOUSE	48	29	35	42	29	54	55	64	64	0.604167	0.729167	0.875	0.604167	1.125	1.14583	1.33333	1.33333	0.00219205	0.00187798	0.00210605	0.00164837	0.00306408	0.00254259	0.00271173	0.00265162
Sodium/potassium-transporting ATPase subunit alpha-1 OS=Mus musculus OX=10090 GN=Atp1a1 PE=1 SV=1	sp|Q8VDN2|AT1A1_MOUSE	113	20	36	47	31	48	53	61	68	0.176991	0.318584	0.415929	0.274336	0.424779	0.469027	0.539823	0.60177	0.000642164	0.000820518	0.0010011	0.000748481	0.00115694	0.00104076	0.00109789	0.00119675
Alpha-actinin-2 OS=Mus musculus OX=10090 GN=Actn2 PE=1 SV=2	sp|Q9JI91|ACTN2_MOUSE	104	38	55	40	38	66	41	35	64	0.365385	0.528846	0.384615	0.365385	0.634615	0.394231	0.336538	0.615385	0.0013257	0.00136205	0.000925735	0.000996891	0.00172845	0.000874792	0.000684451	0.00122383
Cytochrome b-c1 complex subunit 1, mitochondrial OS=Mus musculus OX=10090 GN=Uqcrc1 PE=1 SV=2	sp|Q9CZ13|QCR1_MOUSE	53	29	38	47	36	47	53	61	62	0.54717	0.716981	0.886792	0.679245	0.886792	1	1.15094	1.16981	0.00198526	0.00184659	0.00213443	0.00185321	0.00241529	0.00221899	0.00234079	0.00232642
Elongation factor 1-alpha 1 OS=Mus musculus OX=10090 GN=Eef1a1 PE=1 SV=3	sp|P10126|EF1A1_MOUSE	50	15	16	0	8	5	0	0	17	0.3	0.32	0	0.16	0.1	0	0	0.34	0.00108847	0.000824164	0	0.000436533	0.000272362	0	0	0.000676164
ATP synthase subunit d, mitochondrial OS=Mus musculus OX=10090 GN=Atp5pd PE=1 SV=3	sp|Q9DCX2|ATP5H_MOUSE	19	32	38	45	41	39	51	64	52	1.68421	2	2.36842	2.15789	2.05263	2.68421	3.36842	2.73684	0.00611069	0.00515103	0.00570058	0.00588746	0.0055906	0.00595622	0.00685068	0.0054428
14-3-3 protein gamma OS=Mus musculus OX=10090 GN=Ywhag PE=1 SV=2	sp|P61982|1433G_MOUSE	28	20	12	11	12	24	43	35	40	0.714286	0.428571	0.392857	0.428571	0.857143	1.53571	1.25	1.42857	0.00259159	0.00110379	0.000945572	0.00116929	0.00233453	0.00340773	0.00254225	0.00284102
NADH dehydrogenase [ubiquinone] 1 alpha subcomplex subunit 10, mitochondrial OS=Mus musculus OX=10090 GN=Ndufa10 PE=1 SV=1	sp|Q99LC3|NDUAA_MOUSE	41	26	30	39	34	34	36	46	40	0.634146	0.731707	0.95122	0.829268	0.829268	0.878049	1.12195	0.97561	0.00230083	0.00188452	0.0022895	0.00226252	0.00225861	0.00194838	0.00228182	0.00194021
Cytochrome c1, heme protein, mitochondrial OS=Mus musculus OX=10090 GN=Cyc1 PE=1 SV=1	sp|Q9D0M3|CY1_MOUSE	35	29	31	28	32	33	48	58	69	0.828571	0.885714	0.8	0.914286	0.942857	1.37143	1.65714	1.97143	0.00300624	0.00228117	0.00192553	0.00249448	0.00256799	0.00304318	0.00337029	0.00392061
NADH dehydrogenase [ubiquinone] iron-sulfur protein 5 OS=Mus musculus OX=10090 GN=Ndufs5 PE=1 SV=3	sp|Q99LY9|NDUS5_MOUSE	13	48	49	47	42	41	34	38	42	3.69231	3.76923	3.61538	3.23077	3.15385	2.61538	2.92308	3.23077	0.0133965	0.00970771	0.00870191	0.00881462	0.00858989	0.0058035	0.00594494	0.00642509
Sarcalumenin OS=Mus musculus OX=10090 GN=Srl PE=1 SV=2	sp|Q7TQ48|SRCA_MOUSE	54	19	27	33	29	39	46	60	50	0.351852	0.5	0.611111	0.537037	0.722222	0.851852	1.11111	0.925926	0.0012766	0.00128776	0.00147089	0.00146522	0.00196706	0.00189025	0.00225977	0.0018414
Calcium-binding mitochondrial carrier protein Aralar1 OS=Mus musculus OX=10090 GN=Slc25a12 PE=1 SV=1	sp|Q8BH59|CMC1_MOUSE	75	13	35	44	32	43	48	60	50	0.173333	0.466667	0.586667	0.426667	0.573333	0.64	0.8	0.666667	0.000628892	0.00120191	0.00141205	0.00116409	0.00156154	0.00142015	0.00162704	0.00132581
Heat shock protein HSP 90-beta OS=Mus musculus OX=10090 GN=Hsp90ab1 PE=1 SV=3	sp|P11499|HS90B_MOUSE	83	17	31	34	21	31	42	53	80	0.204819	0.373494	0.409639	0.253012	0.373494	0.506024	0.638554	0.963855	0.00074313	0.000961939	0.000985964	0.000690301	0.00101726	0.00112286	0.00129869	0.00191684
LIM domain-binding protein 3 OS=Mus musculus OX=10090 GN=Ldb3 PE=1 SV=1	sp|Q9JKS4|LDB3_MOUSE	76	17	38	42	32	48	42	56	57	0.223684	0.5	0.552632	0.421053	0.631579	0.552632	0.736842	0.75	0.000811577	0.00128776	0.00133013	0.00114877	0.00172018	0.00122628	0.00149859	0.00149154
Hemoglobin subunit beta-1 OS=Mus musculus OX=10090 GN=Hbb-b1 PE=1 SV=2	sp|P02088|HBB1_MOUSE	16	21	28	40	30	35	46	56	60	1.3125	1.75	2.5	1.875	2.1875	2.875	3.5	3.75	0.00476205	0.00450715	0.00601728	0.00511563	0.00595793	0.00637958	0.00711829	0.00745769
Ubiquitin-40S ribosomal protein S27a OS=Mus musculus OX=10090 GN=Rps27a PE=1 SV=2	sp|P62983|RS27A_MOUSE	18	21	18	24	15	29	17	25	20	1.16667	1	1.33333	0.833333	1.61111	0.944444	1.38889	1.11111	0.00423293	0.00257551	0.00320921	0.00227361	0.00438806	0.00209571	0.00282472	0.00220969
Fructose-bisphosphate aldolase A OS=Mus musculus OX=10090 GN=Aldoa PE=1 SV=2	sp|P05064|ALDOA_MOUSE	39	26	29	27	22	31	41	50	58	0.666667	0.74359	0.692308	0.564103	0.794872	1.05128	1.28205	1.48718	0.00241882	0.00191513	0.00166632	0.00153906	0.00216493	0.00233278	0.00260743	0.00295758
Tropomyosin alpha-1 chain OS=Mus musculus OX=10090 GN=Tpm1 PE=1 SV=1	sp|P58771|TPM1_MOUSE	33	47	49	19	33	41	28	18	46	1.42424	1.48485	0.575758	1	1.24242	0.848485	0.545455	1.39394	0.00516747	0.00382425	0.0013858	0.00272833	0.0033839	0.00188278	0.00110934	0.00277215
Dihydrolipoyllysine-residue acetyltransferase component of pyruvate dehydrogenase complex, mitochondrial OS=Mus musculus OX=10090 GN=Dlat PE=1 SV=2	sp|Q8BMF4|ODP2_MOUSE	68	24	26	38	33	41	43	49	38	0.352941	0.382353	0.558824	0.485294	0.602941	0.632353	0.720588	0.558824	0.00128055	0.000984755	0.00134504	0.00132404	0.00164218	0.00140318	0.00146553	0.00111134
60 kDa heat shock protein, mitochondrial OS=Mus musculus OX=10090 GN=Hspd1 PE=1 SV=1	sp|P63038|CH60_MOUSE	61	13	33	33	21	43	45	52	59	0.213115	0.540984	0.540984	0.344262	0.704918	0.737705	0.852459	0.967213	0.000773228	0.00139331	0.0013021	0.000939262	0.00191993	0.00163696	0.00173373	0.00192351
Alpha-enolase OS=Mus musculus OX=10090 GN=Eno1 PE=1 SV=3	sp|P17182|ENOA_MOUSE	47	21	17	21	20	26	22	30	42	0.446809	0.361702	0.446809	0.425532	0.553191	0.468085	0.638298	0.893617	0.00162112	0.000931569	0.00107543	0.00116099	0.00150669	0.00103867	0.00129817	0.00177715
NADH dehydrogenase [ubiquinone] 1 alpha subcomplex subunit 12 OS=Mus musculus OX=10090 GN=Ndufa12 PE=1 SV=2	sp|Q7TMF3|NDUAC_MOUSE	17	22	28	34	29	34	47	48	49	1.29412	1.64706	2	1.70588	2	2.76471	2.82353	2.88235	0.00469535	0.00424202	0.00481382	0.00465422	0.00544725	0.00613484	0.00574249	0.00573218
Alpha-crystallin B chain OS=Mus musculus OX=10090 GN=Cryab PE=1 SV=2	sp|P23927|CRYAB_MOUSE	20	28	30	25	31	33	36	39	41	1.4	1.5	1.25	1.55	1.65	1.8	1.95	2.05	0.00507952	0.00386327	0.00300864	0.00422892	0.00449398	0.00399417	0.0039659	0.00407687
Fibronectin OS=Mus musculus OX=10090 GN=Fn1 PE=1 SV=4	sp|P11276|FINC_MOUSE	273	17	60	25	38	55	25	18	39	0.0622711	0.21978	0.0915751	0.139194	0.201465	0.0915751	0.0659341	0.142857	0.000225933	0.000566047	0.000220413	0.000379768	0.000548715	0.000203204	0.000134096	0.000284102
Unconventional myosin-XVIIIa OS=Mus musculus OX=10090 GN=Myo18a PE=1 SV=2	sp|Q9JMH9|MY18A_MOUSE	233	17	47	14	40	43	22	20	48	0.0729614	0.201717	0.0600858	0.171674	0.184549	0.0944206	0.0858369	0.206009	0.00026472	0.000519524	0.000144621	0.000468383	0.000502643	0.000209518	0.000174575	0.000409693
Heat shock 70 kDa protein 1B OS=Mus musculus OX=10090 GN=Hspa1b PE=1 SV=3	sp|P17879|HS71B_MOUSE (+1)	70	16	20	25	20	16	17	20	27	0.228571	0.285714	0.357143	0.285714	0.228571	0.242857	0.285714	0.385714	0.000829309	0.000735861	0.000859611	0.000779524	0.000622543	0.000538896	0.000581085	0.000767077
Electron transfer flavoprotein subunit alpha, mitochondrial OS=Mus musculus OX=10090 GN=Etfa PE=1 SV=2	sp|Q99LC5|ETFA_MOUSE	35	20	24	35	25	40	38	43	45	0.571429	0.685714	1	0.714286	1.14286	1.08571	1.22857	1.28571	0.00207327	0.00176607	0.00240691	0.00194881	0.00311271	0.00240918	0.00249866	0.00255692
Pyruvate dehydrogenase E1 component subunit beta, mitochondrial OS=Mus musculus OX=10090 GN=Pdhb PE=1 SV=1	sp|Q9D051|ODPB_MOUSE	39	26	29	27	37	31	31	44	43	0.666667	0.74359	0.692308	0.948718	0.794872	0.794872	1.12821	1.10256	0.00241882	0.00191513	0.00166632	0.00258842	0.00216493	0.00176381	0.00229454	0.00219269
Electron transfer flavoprotein subunit beta OS=Mus musculus OX=10090 GN=Etfb PE=1 SV=3	sp|Q9DCW4|ETFB_MOUSE	28	25	27	29	32	27	41	47	36	0.892857	0.964286	1.03571	1.14286	0.964286	1.46429	1.67857	1.28571	0.00323949	0.00248353	0.00249287	0.0031181	0.00262635	0.00324923	0.00341387	0.00255692
Myosin-14 OS=Mus musculus OX=10090 GN=Myh14 PE=1 SV=1	sp|Q6URW6|MYH14_MOUSE	229	2	24	17	0	21	20	0	23	0.00873362	0.104803	0.0742358	0	0.0917031	0.0873362	0	0.100437	3.16876e-05	0.000269923	0.000178679	0	0.000249765	0.000193798	0	0.00019974
Leucine-rich PPR motif-containing protein, mitochondrial OS=Mus musculus OX=10090 GN=Lrpprc PE=1 SV=2	sp|Q6PB66|LPPRC_MOUSE	157	13	33	26	31	29	34	46	40	0.0828025	0.210191	0.165605	0.197452	0.184713	0.216561	0.292994	0.254777	0.000300426	0.00054135	0.000398597	0.000538716	0.00050309	0.000480545	0.00059589	0.000506679
Dihydrolipoyllysine-residue succinyltransferase component of 2-oxoglutarate dehydrogenase complex, mitochondrial OS=Mus musculus OX=10090 GN=Dlst PE=1 SV=1	sp|Q9D2G2|ODO2_MOUSE	49	15	20	21	22	33	34	47	48	0.306122	0.408163	0.428571	0.44898	0.673469	0.693878	0.959184	0.979592	0.00111068	0.00105123	0.00103153	0.00122497	0.00183428	0.0015397	0.00195078	0.00194813
Annexin A2 OS=Mus musculus OX=10090 GN=Anxa2 PE=1 SV=2	sp|P07356|ANXA2_MOUSE	39	44	32	32	32	40	24	20	12	1.12821	0.820513	0.820513	0.820513	1.02564	0.615385	0.512821	0.307692	0.00409338	0.00211324	0.0019749	0.00223863	0.00279346	0.00136553	0.00104297	0.000611913
Isocitrate dehydrogenase [NAD] subunit alpha, mitochondrial OS=Mus musculus OX=10090 GN=Idh3a PE=1 SV=1	sp|Q9D6R2|IDH3A_MOUSE	40	17	21	23	22	25	28	36	42	0.425	0.525	0.575	0.55	0.625	0.7	0.9	1.05	0.001542	0.00135214	0.00138397	0.00150058	0.00170226	0.00155329	0.00183042	0.00208815
PDZ and LIM domain protein 5 OS=Mus musculus OX=10090 GN=Pdlim5 PE=1 SV=4	sp|Q8CI51|PDLI5_MOUSE	63	22	29	30	31	24	32	38	35	0.349206	0.460317	0.47619	0.492063	0.380952	0.507937	0.603175	0.555556	0.001267	0.00118555	0.00114615	0.00134251	0.00103757	0.0011271	0.00122673	0.00110484
NADH dehydrogenase [ubiquinone] 1 alpha subcomplex subunit 9, mitochondrial OS=Mus musculus OX=10090 GN=Ndufa9 PE=1 SV=2	sp|Q9DC69|NDUA9_MOUSE	43	23	22	28	31	36	32	37	42	0.534884	0.511628	0.651163	0.72093	0.837209	0.744186	0.860465	0.976744	0.00194068	0.0013177	0.00156729	0.00196694	0.00228024	0.00165134	0.00175001	0.00194247
Ig heavy chain V region AC38 205.12 OS=Mus musculus OX=10090 PE=1 SV=1	sp|P06330|HVM51_MOUSE	13	13	48	33	20	10	46	32	31	1	3.69231	2.53846	1.53846	0.769231	3.53846	2.46154	2.38462	0.00362823	0.00950959	0.00610985	0.00419744	0.00209509	0.00785179	0.00500627	0.00474232
Alpha-actinin-4 OS=Mus musculus OX=10090 GN=Actn4 PE=1 SV=1	sp|P57780|ACTN4_MOUSE	105	5	16	14	8	25	49	49	64	0.047619	0.152381	0.133333	0.0761905	0.238095	0.466667	0.466667	0.609524	0.000172773	0.000392459	0.000320921	0.000207873	0.000648482	0.00103553	0.000949105	0.00121217
Cysteine-rich protein 2 OS=Mus musculus OX=10090 GN=Crip2 PE=1 SV=1	sp|Q9DCT8|CRIP2_MOUSE	23	16	19	21	23	17	15	18	19	0.695652	0.826087	0.913043	1	0.73913	0.652174	0.782609	0.826087	0.00252398	0.0021276	0.00219761	0.00272833	0.00201311	0.00144716	0.00159167	0.00164285
40S ribosomal protein S18 OS=Mus musculus OX=10090 GN=Rps18 PE=1 SV=3	sp|P62270|RS18_MOUSE	18	23	27	21	21	29	30	27	31	1.27778	1.5	1.16667	1.16667	1.61111	1.66667	1.5	1.72222	0.00463607	0.00386327	0.00280806	0.00318306	0.00438806	0.00369831	0.0030507	0.00342501
Calcium-binding mitochondrial carrier protein Aralar2 OS=Mus musculus OX=10090 GN=Slc25a13 PE=1 SV=1	sp|Q9QXX4|CMC2_MOUSE	74	6	25	20	21	30	28	39	29	0.0810811	0.337838	0.27027	0.283784	0.405405	0.378378	0.527027	0.391892	0.00029418	0.000870106	0.000650516	0.000774257	0.00110417	0.000839616	0.00107187	0.000779362
NADH dehydrogenase [ubiquinone] 1 alpha subcomplex subunit 7 OS=Mus musculus OX=10090 GN=Ndufa7 PE=1 SV=3	sp|Q9Z1P6|NDUA7_MOUSE	13	22	25	29	24	30	38	38	29	1.69231	1.92308	2.23077	1.84615	2.30769	2.92308	2.92308	2.23077	0.00614007	0.00495291	0.00536926	0.00503692	0.00628528	0.00648626	0.00594494	0.00443637
NADH dehydrogenase [ubiquinone] flavoprotein 1, mitochondrial OS=Mus musculus OX=10090 GN=Ndufv1 PE=1 SV=1	sp|Q91YT0|NDUV1_MOUSE	51	20	15	24	26	25	37	34	33	0.392157	0.294118	0.470588	0.509804	0.490196	0.72549	0.666667	0.647059	0.00142283	0.000757504	0.00113266	0.00139092	0.00133511	0.00160985	0.00135586	0.00128682
Hexokinase-2 OS=Mus musculus OX=10090 GN=Hk2 PE=1 SV=1	sp|O08528|HXK2_MOUSE	103	16	23	31	19	33	29	36	34	0.15534	0.223301	0.300971	0.184466	0.320388	0.281553	0.349515	0.330097	0.000563608	0.000575115	0.00072441	0.000503285	0.000872617	0.000624763	0.000710842	0.00065647
Tubulin beta-4B chain OS=Mus musculus OX=10090 GN=Tubb4b PE=1 SV=1	sp|P68372|TBB4B_MOUSE	50	27	14	11	16	32	35	31	57	0.54	0.28	0.22	0.32	0.64	0.7	0.62	1.14	0.00195924	0.000721144	0.00052952	0.000873067	0.00174312	0.00155329	0.00126095	0.00226714
Tubulin alpha-1B chain OS=Mus musculus OX=10090 GN=Tuba1b PE=1 SV=2	sp|P05213|TBA1B_MOUSE (+1)	50	34	13	16	9	25	26	32	46	0.68	0.26	0.32	0.18	0.5	0.52	0.64	0.92	0.00246719	0.000669634	0.000770211	0.0004911	0.00136181	0.00115387	0.00130163	0.00182962
14-3-3 protein epsilon OS=Mus musculus OX=10090 GN=Ywhae PE=1 SV=1	sp|P62259|1433E_MOUSE	29	9	4	7	6	15	30	33	42	0.310345	0.137931	0.241379	0.206897	0.517241	1.03448	1.13793	1.44828	0.001126	0.000355243	0.000580978	0.000564483	0.00140877	0.0022955	0.00231432	0.00288021
Myosin light chain 3 OS=Mus musculus OX=10090 GN=Myl3 PE=1 SV=4	sp|P09542|MYL3_MOUSE	22	23	31	13	28	30	29	11	26	1.04545	1.40909	0.590909	1.27273	1.36364	1.31818	0.5	1.18182	0.00379314	0.00362913	0.00142227	0.00347242	0.00371403	0.00292503	0.0010169	0.0023503
Mitochondrial 2-oxoglutarate/malate carrier protein OS=Mus musculus OX=10090 GN=Slc25a11 PE=1 SV=3	sp|Q9CR62|M2OM_MOUSE	34	10	11	20	10	20	44	40	30	0.294118	0.323529	0.588235	0.294118	0.588235	1.29412	1.17647	0.882353	0.00106713	0.000833255	0.00141583	0.000802451	0.00160213	0.00287163	0.0023927	0.00175475
Protein SGT1 homolog OS=Mus musculus OX=10090 GN=Sugt1 PE=1 SV=3	sp|Q9CX34|SGT1_MOUSE	38	0	0	0	0	41	52	52	57	0	0	0	0	1.07895	1.36842	1.36842	1.5	0	0	0	0	0.00293865	0.00303651	0.00278309	0.00298308
Cytochrome b-c1 complex subunit 8 OS=Mus musculus OX=10090 GN=Uqcrq PE=1 SV=3	sp|Q9CQ69|QCR8_MOUSE	10	20	21	23	22	26	30	29	26	2	2.1	2.3	2.2	2.6	3	2.9	2.6	0.00725645	0.00540858	0.0055359	0.00600233	0.00708142	0.00665696	0.00589801	0.00517066
Enoyl-CoA delta isomerase 1, mitochondrial OS=Mus musculus OX=10090 GN=Eci1 PE=1 SV=2	sp|P42125|ECI1_MOUSE	32	20	29	23	26	24	23	33	32	0.625	0.90625	0.71875	0.8125	0.75	0.71875	1.03125	1	0.00226764	0.00233406	0.00172997	0.00221677	0.00204272	0.0015949	0.00209735	0.00198872
Titin OS=Mus musculus OX=10090 GN=Ttn PE=1 SV=1	sp|A2ASS6|TITIN_MOUSE	3906	7	15	7	11	25	8	9	12	0.00179211	0.00384025	0.00179211	0.00281618	0.00640041	0.00204813	0.00230415	0.0030722	6.5022e-06	9.89061e-06	4.31346e-06	7.68348e-06	1.74323e-05	4.54477e-06	4.68617e-06	6.10973e-06
Complement C3 OS=Mus musculus OX=10090 GN=C3 PE=1 SV=3	sp|P01027|CO3_MOUSE	186	5	14	29	18	15	4	12	20	0.0268817	0.0752688	0.155914	0.0967742	0.0806452	0.0215054	0.0645161	0.107527	9.75329e-05	0.000193856	0.000375271	0.000264032	0.000219647	4.77201e-05	0.000131213	0.000213841
Cytochrome c oxidase subunit NDUFA4 OS=Mus musculus OX=10090 GN=Ndufa4 PE=1 SV=2	sp|Q62425|NDUA4_MOUSE	9	20	18	21	16	24	32	31	26	2.22222	2	2.33333	1.77778	2.66667	3.55556	3.44444	2.88889	0.00806272	0.00515103	0.00561613	0.00485037	0.007263	0.00788973	0.0070053	0.00574518
Dihydrolipoyl dehydrogenase, mitochondrial OS=Mus musculus OX=10090 GN=Dld PE=1 SV=2	sp|O08749|DLDH_MOUSE	54	13	18	25	16	29	30	42	34	0.240741	0.333333	0.462963	0.296296	0.537037	0.555556	0.777778	0.62963	0.000873462	0.000858505	0.00111431	0.000808395	0.00146269	0.00123277	0.00158184	0.00125216
Creatine kinase M-type OS=Mus musculus OX=10090 GN=Ckm PE=1 SV=1	sp|P07310|KCRM_MOUSE	43	13	19	19	15	21	24	24	22	0.302326	0.44186	0.44186	0.348837	0.488372	0.55814	0.55814	0.511628	0.00109691	0.00113802	0.00106352	0.000951744	0.00133014	0.0012385	0.00113514	0.00101748
14-3-3 protein eta OS=Mus musculus OX=10090 GN=Ywhah PE=1 SV=2	sp|P68510|1433F_MOUSE	28	0	0	0	0	0	15	0	16	0	0	0	0	0	0.535714	0	0.571429	0	0	0	0	0	0.00118874	0	0.00113641
Triosephosphate isomerase OS=Mus musculus OX=10090 GN=Tpi1 PE=1 SV=5	sp|P17751|TPIS_MOUSE	27	26	22	33	22	26	23	25	26	0.962963	0.814815	1.22222	0.814815	0.962963	0.851852	0.925926	0.962963	0.00349385	0.00209857	0.00294178	0.00222309	0.00262275	0.00189025	0.00188315	0.00191506
Cytochrome c oxidase subunit 4 isoform 1, mitochondrial OS=Mus musculus OX=10090 GN=Cox4i1 PE=1 SV=2	sp|P19783|COX41_MOUSE	20	16	25	23	14	23	34	32	31	0.8	1.25	1.15	0.7	1.15	1.7	1.6	1.55	0.00290258	0.00321939	0.00276795	0.00190983	0.00313217	0.00377227	0.00325407	0.00308251
Cullin-1 OS=Mus musculus OX=10090 GN=Cul1 PE=1 SV=1	sp|Q9WTX6|CUL1_MOUSE	90	13	32	41	24	16	20	28	20	0.144444	0.355556	0.455556	0.266667	0.177778	0.222222	0.311111	0.222222	0.000524077	0.000915738	0.00109648	0.000727556	0.0004842	0.000493108	0.000632737	0.000441937
Tubulin alpha-4A chain OS=Mus musculus OX=10090 GN=Tuba4a PE=1 SV=1	sp|P68368|TBA4A_MOUSE	50	28	0	0	10	0	13	0	12	0.56	0	0	0.2	0	0.26	0	0.24	0.00203181	0	0	0.000545667	0	0.000576936	0	0.000477292
Malate dehydrogenase, mitochondrial OS=Mus musculus OX=10090 GN=Mdh2 PE=1 SV=3	sp|P08249|MDHM_MOUSE	36	13	18	25	26	33	26	30	35	0.361111	0.5	0.694444	0.722222	0.916667	0.722222	0.833333	0.972222	0.00131019	0.00128776	0.00167147	0.00197046	0.00249665	0.0016026	0.00169483	0.00193347
Methylcrotonoyl-CoA carboxylase subunit alpha, mitochondrial OS=Mus musculus OX=10090 GN=Mccc1 PE=1 SV=2	sp|Q99MR8|MCCA_MOUSE	79	3	19	17	16	27	27	34	32	0.0379747	0.240506	0.21519	0.202532	0.341772	0.341772	0.43038	0.405063	0.000137781	0.000619427	0.000517943	0.000552574	0.000930859	0.000758387	0.000875305	0.000805556
Caveolae-associated protein 1 OS=Mus musculus OX=10090 GN=Cavin1 PE=1 SV=1	sp|O54724|CAVN1_MOUSE	44	19	23	21	18	25	14	34	29	0.431818	0.522727	0.477273	0.409091	0.568182	0.318182	0.772727	0.659091	0.00156673	0.00134629	0.00114875	0.00111614	0.00154751	0.000706041	0.00157157	0.00131075
14-3-3 protein sigma OS=Mus musculus OX=10090 GN=Sfn PE=1 SV=2	sp|O70456|1433S_MOUSE	28	17	6	0	11	0	0	0	0	0.607143	0.214286	0	0.392857	0	0	0	0	0.00220285	0.000551896	0	0.00107185	0	0	0	0
Tubulin beta-5 chain OS=Mus musculus OX=10090 GN=Tubb5 PE=1 SV=1	sp|P99024|TBB5_MOUSE	50	10	0	9	10	0	19	0	21	0.2	0	0.18	0.2	0	0.38	0	0.42	0.000725645	0	0.000433244	0.000545667	0	0.000843214	0	0.000835261
Protein NipSnap homolog 2 OS=Mus musculus OX=10090 GN=Nipsnap2 PE=1 SV=1	sp|O55126|NIPS2_MOUSE	33	15	16	23	23	27	20	24	25	0.454545	0.484848	0.69697	0.69697	0.818182	0.606061	0.727273	0.757576	0.00164919	0.00124873	0.00167754	0.00190157	0.00222842	0.00134484	0.00147912	0.0015066
Desmin OS=Mus musculus OX=10090 GN=Des PE=1 SV=3	sp|P31001|DESM_MOUSE	53	16	18	8	11	27	14	10	15	0.301887	0.339623	0.150943	0.207547	0.509434	0.264151	0.188679	0.283019	0.00109531	0.000874703	0.000363307	0.000566258	0.00138751	0.000586147	0.000383735	0.000562844
NADH dehydrogenase [ubiquinone] iron-sulfur protein 2, mitochondrial OS=Mus musculus OX=10090 GN=Ndufs2 PE=1 SV=1	sp|Q91WD5|NDUS2_MOUSE	53	12	12	20	16	24	29	34	35	0.226415	0.226415	0.377358	0.301887	0.45283	0.54717	0.641509	0.660377	0.000821485	0.000583135	0.000908268	0.000823648	0.00123334	0.00121416	0.0013047	0.0013133
Hydroxyacyl-coenzyme A dehydrogenase, mitochondrial OS=Mus musculus OX=10090 GN=Hadh PE=1 SV=2	sp|Q61425|HCDH_MOUSE	34	16	19	22	21	28	24	28	27	0.470588	0.558824	0.647059	0.617647	0.823529	0.705882	0.823529	0.794118	0.0017074	0.00143926	0.00155741	0.00168515	0.00224298	0.00156634	0.00167489	0.00157928
ATP synthase subunit e, mitochondrial OS=Mus musculus OX=10090 GN=Atp5me PE=1 SV=2	sp|Q06185|ATP5I_MOUSE	8	16	19	26	20	20	29	19	24	2	2.375	3.25	2.5	2.5	3.625	2.375	3	0.00725645	0.00611685	0.00782246	0.00682083	0.00680906	0.00804382	0.00483027	0.00596615
Calsequestrin-2 OS=Mus musculus OX=10090 GN=Casq2 PE=1 SV=3	sp|O09161|CASQ2_MOUSE	48	9	13	13	17	24	23	28	30	0.1875	0.270833	0.270833	0.354167	0.5	0.479167	0.583333	0.625	0.000680292	0.000697535	0.000651872	0.000966285	0.00136181	0.00106326	0.00118638	0.00124295
Basement membrane-specific heparan sulfate proteoglycan core protein OS=Mus musculus OX=10090 GN=Hspg2 PE=1 SV=1	sp|Q05793|PGBM_MOUSE	398	12	29	18	23	36	15	17	19	0.0301508	0.0728643	0.0452261	0.0577889	0.0904523	0.0376884	0.0427136	0.0477387	0.000109394	0.000187663	0.000108855	0.000157668	0.000246358	8.36301e-05	8.68707e-05	9.49387e-05
NADH dehydrogenase [ubiquinone] 1 alpha subcomplex subunit 8 OS=Mus musculus OX=10090 GN=Ndufa8 PE=1 SV=3	sp|Q9DCJ5|NDUA8_MOUSE	20	13	25	23	15	16	25	22	28	0.65	1.25	1.15	0.75	0.8	1.25	1.1	1.4	0.00235835	0.00321939	0.00276795	0.00204625	0.0021789	0.00277373	0.00223718	0.0027842
40S ribosomal protein S19 OS=Mus musculus OX=10090 GN=Rps19 PE=1 SV=3	sp|Q9CZX8|RS19_MOUSE	16	17	22	22	24	22	19	26	18	1.0625	1.375	1.375	1.5	1.375	1.1875	1.625	1.125	0.00385499	0.00354133	0.0033095	0.0040925	0.00374498	0.00263504	0.00330492	0.00223731
Sodium/potassium-transporting ATPase subunit alpha-2 OS=Mus musculus OX=10090 GN=Atp1a2 PE=1 SV=1	sp|Q6PIE5|AT1A2_MOUSE	112	0	0	15	0	0	14	16	17	0	0	0.133929	0	0	0.125	0.142857	0.151786	0	0	0.000322354	0	0	0.000277373	0.000290542	0.000301859
Tubulin beta-2A chain OS=Mus musculus OX=10090 GN=Tubb2a PE=1 SV=1	sp|Q7TMM9|TBB2A_MOUSE	50	10	0	0	0	0	0	0	0	0.2	0	0	0	0	0	0	0	0.000725645	0	0	0	0	0	0	0
Ig kappa chain V-V region HP R16.7 OS=Mus musculus OX=10090 PE=1 SV=1	sp|P01644|KV5AB_MOUSE (+1)	12	9	22	18	21	12	22	18	21	0.75	1.83333	1.5	1.75	1	1.83333	1.5	1.75	0.00272117	0.00472178	0.00361037	0.00477458	0.00272362	0.00406814	0.0030507	0.00348025
Protein 4.1 OS=Mus musculus OX=10090 GN=Epb41 PE=1 SV=2	sp|P48193|EPB41_MOUSE	96	14	30	13	18	35	13	8	30	0.145833	0.3125	0.135417	0.1875	0.364583	0.135417	0.0833333	0.3125	0.000529116	0.000804848	0.000325936	0.000511563	0.000992988	0.000300488	0.000169483	0.000621474
Heat shock 70 kDa protein 4 OS=Mus musculus OX=10090 GN=Hspa4 PE=1 SV=1	sp|Q61316|HSP74_MOUSE	94	13	24	26	22	17	13	23	21	0.138298	0.255319	0.276596	0.234043	0.180851	0.138298	0.244681	0.223404	0.000501776	0.000657578	0.000665741	0.000638546	0.00049257	0.000306881	0.000497631	0.000444288
L-lactate dehydrogenase B chain OS=Mus musculus OX=10090 GN=Ldhb PE=1 SV=2	sp|P16125|LDHB_MOUSE	37	12	11	20	14	19	17	21	25	0.324324	0.297297	0.540541	0.378378	0.513514	0.459459	0.567568	0.675676	0.00117672	0.000765693	0.00130103	0.00103234	0.00139862	0.00101953	0.00115432	0.00134373
Heat shock protein HSP 90-alpha OS=Mus musculus OX=10090 GN=Hsp90aa1 PE=1 SV=4	sp|P07901|HS90A_MOUSE	85	2	11	11	8	0	12	14	37	0.0235294	0.129412	0.129412	0.0941176	0	0.141176	0.164706	0.435294	8.537e-05	0.000333302	0.000311483	0.000256784	0	0.000313268	0.000334978	0.000865677
Elongation factor 2 OS=Mus musculus OX=10090 GN=Eef2 PE=1 SV=2	sp|P58252|EF2_MOUSE	95	18	22	22	7	16	17	21	33	0.189474	0.231579	0.231579	0.0736842	0.168421	0.178947	0.221053	0.347368	0.000687453	0.000596435	0.00055739	0.000201035	0.000458716	0.000397082	0.000449576	0.000690817
Filamin-C OS=Mus musculus OX=10090 GN=Flnc PE=1 SV=3	sp|Q8VHX6|FLNC_MOUSE	291	12	16	18	21	33	27	16	13	0.0412371	0.0549828	0.0618557	0.0721649	0.113402	0.0927835	0.0549828	0.0446735	0.000149618	0.000141609	0.000148881	0.00019689	0.000308865	0.000205885	0.000111824	8.8843e-05
Isocitrate dehydrogenase [NAD] subunit gamma 1, mitochondrial OS=Mus musculus OX=10090 GN=Idh3g PE=1 SV=1	sp|P70404|IDHG1_MOUSE	43	12	13	21	14	22	22	29	27	0.27907	0.302326	0.488372	0.325581	0.511628	0.511628	0.674419	0.627907	0.00101253	0.000778644	0.00117547	0.000888295	0.00139348	0.00113529	0.00137163	0.00124873
Myosin regulatory light chain 2, ventricular/cardiac muscle isoform OS=Mus musculus OX=10090 GN=Myl2 PE=1 SV=3	sp|P51667|MLRV_MOUSE	19	19	20	18	17	20	26	20	19	1	1.05263	0.947368	0.894737	1.05263	1.36842	1.05263	1	0.00362823	0.00271107	0.00228023	0.00244114	0.00286697	0.00303651	0.00214084	0.00198872
F-box/WD repeat-containing protein 5 OS=Mus musculus OX=10090 GN=Fbxw5 PE=1 SV=1	sp|Q9QXW2|FBXW5_MOUSE	65	6	28	22	22	16	15	19	17	0.0923077	0.430769	0.338462	0.338462	0.246154	0.230769	0.292308	0.261538	0.000334913	0.00110945	0.000814647	0.000923436	0.00067043	0.000512074	0.000594494	0.000520126
Protein-glutamine gamma-glutamyltransferase K OS=Mus musculus OX=10090 GN=Tgm1 PE=1 SV=2	sp|Q9JLF6|TGM1_MOUSE	90	21	25	27	17	19	21	6	5	0.233333	0.277778	0.3	0.188889	0.211111	0.233333	0.0666667	0.0555556	0.000846586	0.000715421	0.000722073	0.000515352	0.000574987	0.000517763	0.000135586	0.000110484
Y-box-binding protein 1 OS=Mus musculus OX=10090 GN=Ybx1 PE=1 SV=3	sp|P62960|YBOX1_MOUSE	36	13	11	28	18	17	19	27	25	0.361111	0.305556	0.777778	0.5	0.472222	0.527778	0.75	0.694444	0.00131019	0.000786963	0.00187204	0.00136417	0.00128616	0.00117113	0.00152535	0.00138105
Desmoglein-1-beta OS=Mus musculus OX=10090 GN=Dsg1b PE=1 SV=1	sp|Q7TSF1|DSG1B_MOUSE	114	21	9	23	24	29	20	6	4	0.184211	0.0789474	0.201754	0.210526	0.254386	0.175439	0.0526316	0.0350877	0.000668357	0.00020333	0.000485605	0.000574386	0.000692852	0.000389296	0.000107042	6.97795e-05
Protein-glutamine gamma-glutamyltransferase 2 OS=Mus musculus OX=10090 GN=Tgm2 PE=1 SV=4	sp|P21981|TGM2_MOUSE	77	6	20	14	16	25	20	16	22	0.0779221	0.25974	0.181818	0.207792	0.324675	0.25974	0.207792	0.285714	0.000282719	0.000668965	0.00043762	0.000566926	0.000884293	0.00057636	0.000422607	0.000568205
Cytochrome c oxidase subunit 6C OS=Mus musculus OX=10090 GN=Cox6c PE=1 SV=3	sp|Q9CPQ1|COX6C_MOUSE	8	12	17	20	16	22	24	24	21	1.5	2.125	2.5	2	2.75	3	3	2.625	0.00544234	0.00547297	0.00601728	0.00545667	0.00748996	0.00665696	0.00610139	0.00522038
40S ribosomal protein S4, X isoform OS=Mus musculus OX=10090 GN=Rps4x PE=1 SV=2	sp|P62702|RS4X_MOUSE	30	15	16	19	14	18	16	15	22	0.5	0.533333	0.633333	0.466667	0.6	0.533333	0.5	0.733333	0.00181411	0.00137361	0.00152438	0.00127322	0.00163417	0.00118346	0.0010169	0.00145839
NADH dehydrogenase [ubiquinone] 1 alpha subcomplex subunit 6 OS=Mus musculus OX=10090 GN=Ndufa6 PE=1 SV=1	sp|Q9CQZ5|NDUA6_MOUSE	15	12	15	13	13	21	25	27	23	0.8	1	0.866667	0.866667	1.4	1.66667	1.8	1.53333	0.00290258	0.00257551	0.00208599	0.00236456	0.00381307	0.00369831	0.00366083	0.00304937
Fibrillin-1 OS=Mus musculus OX=10090 GN=Fbn1 PE=1 SV=2	sp|Q61554|FBN1_MOUSE	312	11	37	5	23	32	12	0	29	0.0352564	0.11859	0.0160256	0.0737179	0.102564	0.0384615	0	0.0929487	0.000127918	0.00030543	3.85723e-05	0.000201127	0.000279346	8.53456e-05	0	0.000184849
Apoptosis-inducing factor 1, mitochondrial OS=Mus musculus OX=10090 GN=Aifm1 PE=1 SV=1	sp|Q9Z0X1|AIFM1_MOUSE	67	6	16	22	16	19	24	22	23	0.0895522	0.238806	0.328358	0.238806	0.283582	0.358209	0.328358	0.343284	0.000324916	0.000615048	0.000790329	0.000651542	0.000772371	0.00079486	0.000667814	0.000682694
NADH dehydrogenase [ubiquinone] iron-sulfur protein 7, mitochondrial OS=Mus musculus OX=10090 GN=Ndufs7 PE=1 SV=1	sp|Q9DC70|NDUS7_MOUSE	25	11	14	14	17	16	13	18	16	0.44	0.56	0.56	0.68	0.64	0.52	0.72	0.64	0.00159642	0.00144229	0.00134787	0.00185527	0.00174312	0.00115387	0.00146433	0.00127278
Mitochondrial carnitine/acylcarnitine carrier protein OS=Mus musculus OX=10090 GN=Slc25a20 PE=1 SV=1	sp|Q9Z2Z6|MCAT_MOUSE	33	14	14	15	17	18	15	23	18	0.424242	0.424242	0.454545	0.515152	0.545455	0.454545	0.69697	0.545455	0.00153925	0.00109264	0.00109405	0.00140551	0.00148561	0.00100863	0.00141749	0.00108475
Ig kappa chain V19-17 OS=Mus musculus OX=10090 GN=Igk-V19-17 PE=1 SV=1	sp|P01633|KV5A1_MOUSE	16	9	10	9	14	7	12	10	14	0.5625	0.625	0.5625	0.875	0.4375	0.75	0.625	0.875	0.00204088	0.0016097	0.00135389	0.00238729	0.00119159	0.00166424	0.00127112	0.00174013
Pyruvate kinase PKM OS=Mus musculus OX=10090 GN=Pkm PE=1 SV=4	sp|P52480|KPYM_MOUSE	58	17	10	8	6	7	8	11	28	0.293103	0.172414	0.137931	0.103448	0.12069	0.137931	0.189655	0.482759	0.00106345	0.000444054	0.000331988	0.000282241	0.000328713	0.000306067	0.00038572	0.00096007
Myomesin-1 OS=Mus musculus OX=10090 GN=Myom1 PE=1 SV=2	sp|Q62234|MYOM1_MOUSE	185	3	11	13	15	19	17	25	34	0.0162162	0.0594595	0.0702703	0.0810811	0.102703	0.0918919	0.135135	0.183784	5.88361e-05	0.000153139	0.000169134	0.000221216	0.000279723	0.000203907	0.000274837	0.000365494
Keratin, type II cuticular Hb2 OS=Mus musculus OX=10090 GN=Krt82 PE=1 SV=2	sp|Q99M74|KRT82_MOUSE	57	21	13	11	14	16	15	3	8	0.368421	0.22807	0.192982	0.245614	0.280702	0.263158	0.0526316	0.140351	0.00133671	0.000587398	0.000464492	0.000670117	0.000764526	0.000583943	0.000107042	0.000279118
Myosin light polypeptide 6 OS=Mus musculus OX=10090 GN=Myl6 PE=1 SV=3	sp|Q60605|MYL6_MOUSE	17	20	23	9	12	17	14	9	28	1.17647	1.35294	0.529412	0.705882	1	0.823529	0.529412	1.64706	0.0042685	0.00348452	0.00127425	0.00192588	0.00272362	0.0018274	0.00107672	0.00327553
Serine/arginine repetitive matrix protein 2 OS=Mus musculus OX=10090 GN=Srrm2 PE=1 SV=3	sp|Q8BTI8|SRRM2_MOUSE	295	0	0	5	0	0	0	0	0	0	0	0.0169492	0	0	0	0	0	0	0	4.07951e-05	0	0	0	0	0
Hexokinase-1 OS=Mus musculus OX=10090 GN=Hk1 PE=1 SV=3	sp|P17710|HXK1_MOUSE	108	14	9	19	11	16	13	22	21	0.12963	0.0833333	0.175926	0.101852	0.148148	0.12037	0.203704	0.194444	0.000470325	0.000214626	0.000423438	0.000277886	0.0004035	0.0002671	0.000414292	0.000386695
Histone H4 OS=Mus musculus OX=10090 GN=H4c1 PE=1 SV=2	sp|P62806|H4_MOUSE	11	31	11	13	12	12	20	8	20	2.81818	1	1.18182	1.09091	1.09091	1.81818	0.727273	1.81818	0.010225	0.00257551	0.00284453	0.00297636	0.00297123	0.00403452	0.00147912	0.00361585
Alpha-actinin-1 OS=Mus musculus OX=10090 GN=Actn1 PE=1 SV=1	sp|Q7TPR4|ACTN1_MOUSE	103	0	0	0	0	0	0	21	23	0	0	0	0	0	0	0.203883	0.223301	0	0	0	0	0	0	0.000414658	0.000444082
Kinesin-like protein KIF27 OS=Mus musculus OX=10090 GN=Kif27 PE=1 SV=1	sp|Q7M6Z4|KIF27_MOUSE	159	12	9	7	11	14	4	4	0	0.0754717	0.0566038	0.0440252	0.0691824	0.0880503	0.0251572	0.0251572	0	0.000273828	0.000145784	0.000105965	0.000188753	0.000239816	5.58235e-05	5.11647e-05	0
NADH dehydrogenase [ubiquinone] 1 alpha subcomplex subunit 13 OS=Mus musculus OX=10090 GN=Ndufa13 PE=1 SV=3	sp|Q9ERS2|NDUAD_MOUSE	17	12	11	9	11	16	23	21	15	0.705882	0.647059	0.529412	0.647059	0.941176	1.35294	1.23529	0.882353	0.0025611	0.00166651	0.00127425	0.00176539	0.00256341	0.00300216	0.00251234	0.00175475
Tripartite motif-containing protein 72 OS=Mus musculus OX=10090 GN=Trim72 PE=1 SV=1	sp|Q1XH17|TRI72_MOUSE	53	17	11	11	11	20	13	20	19	0.320755	0.207547	0.207547	0.207547	0.377358	0.245283	0.377358	0.358491	0.00116377	0.000534541	0.000499548	0.000566258	0.00102778	0.000544279	0.000767471	0.000712936
Tropomyosin alpha-3 chain OS=Mus musculus OX=10090 GN=Tpm3 PE=1 SV=3	sp|P21107|TPM3_MOUSE	33	8	0	0	0	0	0	0	7	0.242424	0	0	0	0	0	0	0.212121	0.00087957	0	0	0	0	0	0	0.000421849
Propionyl-CoA carboxylase alpha chain, mitochondrial OS=Mus musculus OX=10090 GN=Pcca PE=1 SV=2	sp|Q91ZA3|PCCA_MOUSE	80	0	9	16	14	17	18	25	21	0	0.1125	0.2	0.175	0.2125	0.225	0.3125	0.2625	0	0.000289745	0.000481382	0.000477458	0.00057877	0.000499272	0.000635562	0.000522038
40S ribosomal protein S3a OS=Mus musculus OX=10090 GN=Rps3a PE=1 SV=3	sp|P97351|RS3A_MOUSE	30	17	20	17	15	20	12	16	12	0.566667	0.666667	0.566667	0.5	0.666667	0.4	0.533333	0.4	0.00205599	0.00171701	0.00136392	0.00136417	0.00181575	0.000887594	0.00108469	0.000795487
Collagen alpha-1(VI) chain OS=Mus musculus OX=10090 GN=Col6a1 PE=1 SV=1	sp|Q04857|CO6A1_MOUSE	108	12	21	11	16	28	11	7	17	0.111111	0.194444	0.101852	0.148148	0.259259	0.101852	0.0648148	0.157407	0.000403136	0.000500794	0.000245148	0.000404198	0.000706125	0.000226008	0.00013182	0.000313039
Aspartate aminotransferase, mitochondrial OS=Mus musculus OX=10090 GN=Got2 PE=1 SV=1	sp|P05202|AATM_MOUSE	47	11	18	18	14	16	16	21	20	0.234043	0.382979	0.382979	0.297872	0.340426	0.340426	0.446809	0.425532	0.000849159	0.000986367	0.000921796	0.000812695	0.000927191	0.000755399	0.000908718	0.000846263
Acetyl-coenzyme A synthetase 2-like, mitochondrial OS=Mus musculus OX=10090 GN=Acss1 PE=1 SV=1	sp|Q99NB1|ACS2L_MOUSE	75	4	13	18	14	18	19	24	23	0.0533333	0.173333	0.24	0.186667	0.24	0.253333	0.32	0.306667	0.000193505	0.000446422	0.000577659	0.000509289	0.00065367	0.000562143	0.000650815	0.000609873
Junctophilin-2 OS=Mus musculus OX=10090 GN=Jph2 PE=1 SV=2	sp|Q9ET78|JPH2_MOUSE	75	9	16	20	14	15	14	16	21	0.12	0.213333	0.266667	0.186667	0.2	0.186667	0.213333	0.28	0.000435387	0.000549443	0.000641843	0.000509289	0.000544725	0.000414211	0.000433877	0.000556841
NADH dehydrogenase [ubiquinone] 1 alpha subcomplex subunit 2 OS=Mus musculus OX=10090 GN=Ndufa2 PE=1 SV=3	sp|Q9CQ75|NDUA2_MOUSE	11	8	12	14	10	9	16	18	12	0.727273	1.09091	1.27273	0.909091	0.818182	1.45455	1.63636	1.09091	0.00263871	0.00280965	0.00306334	0.0024803	0.00222842	0.00322761	0.00332803	0.00216951
L-lactate dehydrogenase A chain OS=Mus musculus OX=10090 GN=Ldha PE=1 SV=3	sp|P06151|LDHA_MOUSE	36	11	11	5	8	10	9	13	9	0.305556	0.305556	0.138889	0.222222	0.277778	0.25	0.361111	0.25	0.00110862	0.000786963	0.000334293	0.000606296	0.000756562	0.000554746	0.000734427	0.000497179
SRA stem-loop-interacting RNA-binding protein, mitochondrial OS=Mus musculus OX=10090 GN=Slirp PE=1 SV=2	sp|Q9D8T7|SLIRP_MOUSE	13	13	14	15	10	13	15	14	15	1	1.07692	1.15385	0.769231	1	1.15385	1.07692	1.15385	0.00362823	0.00277363	0.0027772	0.00209872	0.00272362	0.00256037	0.00219024	0.00229467
Ig gamma-2A chain C region, membrane-bound form OS=Mus musculus OX=10090 GN=Igh-1a PE=1 SV=3	sp|P01865|GCAM_MOUSE	44	0	0	0	0	0	7	10	6	0	0	0	0	0	0.159091	0.227273	0.136364	0	0	0	0	0	0.00035302	0.000462227	0.000271189
60S ribosomal protein L30 OS=Mus musculus OX=10090 GN=Rpl30 PE=1 SV=2	sp|P62889|RL30_MOUSE	13	9	9	15	8	13	15	16	15	0.692308	0.692308	1.15385	0.615385	1	1.15385	1.23077	1.15385	0.00251185	0.00178305	0.0027772	0.00167897	0.00272362	0.00256037	0.00250313	0.00229467
MICOS complex subunit Mic19 OS=Mus musculus OX=10090 GN=Chchd3 PE=1 SV=1	sp|Q9CRB9|MIC19_MOUSE	26	14	13	16	14	18	11	14	12	0.538462	0.5	0.615385	0.538462	0.692308	0.423077	0.538462	0.461538	0.00195366	0.00128776	0.00148118	0.0014691	0.00188559	0.000938801	0.00109512	0.000917869
Peroxiredoxin-1 OS=Mus musculus OX=10090 GN=Prdx1 PE=1 SV=1	sp|P35700|PRDX1_MOUSE	22	15	11	16	10	17	15	12	15	0.681818	0.5	0.727273	0.454545	0.772727	0.681818	0.545455	0.681818	0.00247379	0.00128776	0.00175048	0.00124015	0.00210462	0.00151294	0.00110934	0.00135594
Cytochrome c oxidase subunit 5B, mitochondrial OS=Mus musculus OX=10090 GN=Cox5b PE=1 SV=1	sp|P19536|COX5B_MOUSE	14	6	7	16	14	12	19	23	25	0.428571	0.5	1.14286	1	0.857143	1.35714	1.64286	1.78571	0.00155495	0.00128776	0.00275076	0.00272833	0.00233453	0.00301148	0.00334124	0.00355128
Peroxiredoxin-6 OS=Mus musculus OX=10090 GN=Prdx6 PE=1 SV=3	sp|O08709|PRDX6_MOUSE	25	15	8	20	15	24	10	16	11	0.6	0.32	0.8	0.6	0.96	0.4	0.64	0.44	0.00217694	0.000824164	0.00192553	0.001637	0.00261468	0.000887594	0.00130163	0.000875035
Mitochondrial pyruvate carrier 2 OS=Mus musculus OX=10090 GN=Mpc2 PE=1 SV=1	sp|Q9D023|MPC2_MOUSE	14	10	10	17	10	15	16	24	22	0.714286	0.714286	1.21429	0.714286	1.07143	1.14286	1.71429	1.57143	0.00259159	0.00183965	0.00292268	0.00194881	0.00291817	0.00253598	0.00348651	0.00312513
Lon protease homolog, mitochondrial OS=Mus musculus OX=10090 GN=Lonp1 PE=1 SV=2	sp|Q8CGK3|LONM_MOUSE	106	9	13	11	10	11	15	18	18	0.0849057	0.122642	0.103774	0.0943396	0.103774	0.141509	0.169811	0.169811	0.000308057	0.000315865	0.000249774	0.00025739	0.00028264	0.000314007	0.000345362	0.000337707
Transitional endoplasmic reticulum ATPase OS=Mus musculus OX=10090 GN=Vcp PE=1 SV=4	sp|Q01853|TERA_MOUSE	89	3	14	18	5	13	14	19	27	0.0337079	0.157303	0.202247	0.0561798	0.146067	0.157303	0.213483	0.303371	0.0001223	0.000405137	0.000486791	0.000153277	0.000397833	0.000349054	0.000434181	0.000603319
NADH dehydrogenase [ubiquinone] 1 alpha subcomplex subunit 5 OS=Mus musculus OX=10090 GN=Ndufa5 PE=1 SV=3	sp|Q9CPP6|NDUA5_MOUSE	13	7	7	16	5	15	19	17	17	0.538462	0.538462	1.23077	0.384615	1.15385	1.46154	1.30769	1.30769	0.00195366	0.00138682	0.00296235	0.00104936	0.00314264	0.00324313	0.00265958	0.00260063
ATP-dependent 6-phosphofructokinase, liver type OS=Mus musculus OX=10090 GN=Pfkl PE=1 SV=4	sp|P12382|PFKAL_MOUSE	85	0	0	0	0	8	7	8	8	0	0	0	0	0.0941176	0.0823529	0.0941176	0.0941176	0	0	0	0	0.000256341	0.00018274	0.000191416	0.000187173
Troponin I, cardiac muscle OS=Mus musculus OX=10090 GN=Tnni3 PE=1 SV=2	sp|P48787|TNNI3_MOUSE	24	10	20	11	12	18	8	8	16	0.416667	0.833333	0.458333	0.5	0.75	0.333333	0.333333	0.666667	0.00151176	0.00214626	0.00110317	0.00136417	0.00204272	0.000739662	0.000677932	0.00132581
Nucleoside diphosphate kinase B OS=Mus musculus OX=10090 GN=Nme2 PE=1 SV=1	sp|Q01768|NDKB_MOUSE	17	14	17	12	10	13	16	19	16	0.823529	1	0.705882	0.588235	0.764706	0.941176	1.11765	0.941176	0.00298795	0.00257551	0.001699	0.0016049	0.00208277	0.00208846	0.00227307	0.00187173
NADH dehydrogenase [ubiquinone] iron-sulfur protein 4, mitochondrial OS=Mus musculus OX=10090 GN=Ndufs4 PE=1 SV=3	sp|Q9CXZ1|NDUS4_MOUSE	20	5	7	12	7	7	8	10	15	0.25	0.35	0.6	0.35	0.35	0.4	0.5	0.75	0.000907056	0.00090143	0.00144415	0.000954917	0.000953268	0.000887594	0.0010169	0.00149154
Citrate synthase, mitochondrial OS=Mus musculus OX=10090 GN=Cs PE=1 SV=1	sp|Q9CZU6|CISY_MOUSE	52	7	8	17	13	18	19	21	18	0.134615	0.153846	0.326923	0.25	0.346154	0.365385	0.403846	0.346154	0.000488415	0.000396233	0.000786875	0.000682083	0.000942793	0.000810783	0.000821341	0.000688402
Clathrin heavy chain 1 OS=Mus musculus OX=10090 GN=Cltc PE=1 SV=3	sp|Q68FD5|CLH1_MOUSE	192	0	11	4	11	13	18	18	19	0	0.0572917	0.0208333	0.0572917	0.0677083	0.09375	0.09375	0.0989583	0	0.000147555	5.0144e-05	0.000156311	0.000184412	0.00020803	0.000190668	0.0001968
Enoyl-CoA hydratase, mitochondrial OS=Mus musculus OX=10090 GN=Echs1 PE=1 SV=1	sp|Q8BH95|ECHM_MOUSE	31	10	10	11	13	14	10	13	14	0.322581	0.322581	0.354839	0.419355	0.451613	0.322581	0.419355	0.451613	0.0011704	0.000830811	0.000854065	0.00114414	0.00123002	0.000715802	0.000852883	0.00089813
Heat shock 70 kDa protein 4L OS=Mus musculus OX=10090 GN=Hspa4l PE=1 SV=2	sp|P48722|HS74L_MOUSE	94	10	15	28	15	7	11	14	9	0.106383	0.159574	0.297872	0.159574	0.0744681	0.117021	0.148936	0.0957447	0.000385981	0.000410986	0.000716952	0.000435372	0.000202823	0.000259668	0.000302906	0.000190409
Peroxiredoxin-2 OS=Mus musculus OX=10090 GN=Prdx2 PE=1 SV=3	sp|Q61171|PRDX2_MOUSE	22	12	10	8	9	12	12	10	10	0.545455	0.454545	0.363636	0.409091	0.545455	0.545455	0.454545	0.454545	0.00197903	0.00117069	0.00087524	0.00111614	0.00148561	0.00121036	0.000924453	0.000903962
Ig kappa chain V-III region PC 6684 OS=Mus musculus OX=10090 PE=1 SV=1	sp|P01670|KV3AI_MOUSE	12	4	20	11	16	0	12	8	12	0.333333	1.66667	0.916667	1.33333	0	1	0.666667	1	0.00120941	0.00429252	0.00220634	0.00363778	0	0.00221899	0.00135586	0.00198872
Ig heavy chain V-III region J606 OS=Mus musculus OX=10090 PE=1 SV=1	sp|P01801|HVM32_MOUSE	13	3	18	25	10	9	13	18	8	0.230769	1.38462	1.92308	0.769231	0.692308	1	1.38462	0.615385	0.000837283	0.0035661	0.00462867	0.00209872	0.00188559	0.00221899	0.00281603	0.00122383
Fatty acid-binding protein, heart OS=Mus musculus OX=10090 GN=Fabp3 PE=1 SV=5	sp|P11404|FABPH_MOUSE	15	5	11	20	9	10	16	12	6	0.333333	0.733333	1.33333	0.6	0.666667	1.06667	0.8	0.4	0.00120941	0.00188871	0.00320921	0.001637	0.00181575	0.00236692	0.00162704	0.000795487
Superoxide dismutase [Mn], mitochondrial OS=Mus musculus OX=10090 GN=Sod2 PE=1 SV=3	sp|P09671|SODM_MOUSE	25	6	11	13	10	15	15	19	15	0.24	0.44	0.52	0.4	0.6	0.6	0.76	0.6	0.000870774	0.00113323	0.00125159	0.00109133	0.00163417	0.00133139	0.00154569	0.00119323
40S ribosomal protein S2 OS=Mus musculus OX=10090 GN=Rps2 PE=1 SV=3	sp|P25444|RS2_MOUSE	31	6	11	14	9	7	14	15	14	0.193548	0.354839	0.451613	0.290323	0.225806	0.451613	0.483871	0.451613	0.000702237	0.000913892	0.00108699	0.000792097	0.000615012	0.00100212	0.000984095	0.00089813
40S ribosomal protein S11 OS=Mus musculus OX=10090 GN=Rps11 PE=1 SV=3	sp|P62281|RS11_MOUSE	18	10	14	16	8	12	12	14	18	0.555556	0.777778	0.888889	0.444444	0.666667	0.666667	0.777778	1	0.00201568	0.00200318	0.00213948	0.00121259	0.00181575	0.00147932	0.00158184	0.00198872
Pregnancy zone protein OS=Mus musculus OX=10090 GN=Pzp PE=1 SV=3	sp|Q61838|PZP_MOUSE	166	3	0	9	19	11	8	16	24	0.0180723	0	0.0542169	0.114458	0.0662651	0.0481928	0.0963855	0.144578	6.55703e-05	0	0.000130495	0.000312279	0.000180481	0.000106939	0.000196029	0.000287525
Voltage-dependent anion-selective channel protein 2 OS=Mus musculus OX=10090 GN=Vdac2 PE=1 SV=2	sp|Q60930|VDAC2_MOUSE	32	4	7	6	7	11	10	11	12	0.125	0.21875	0.1875	0.21875	0.34375	0.3125	0.34375	0.375	0.000453528	0.000563394	0.000451296	0.000596823	0.000936246	0.000693433	0.000699118	0.000745769
Plakophilin-1 OS=Mus musculus OX=10090 GN=Pkp1 PE=1 SV=1	sp|P97350|PKP1_MOUSE	81	16	13	8	15	9	15	2	3	0.197531	0.160494	0.0987654	0.185185	0.111111	0.185185	0.0246914	0.037037	0.000716686	0.000413354	0.00023772	0.000505247	0.000302625	0.000410923	5.02172e-05	7.36562e-05
Vinculin OS=Mus musculus OX=10090 GN=Vcl PE=1 SV=4	sp|Q64727|VINC_MOUSE	117	7	23	7	6	18	10	3	19	0.0598291	0.196581	0.0598291	0.0512821	0.153846	0.0854701	0.025641	0.162393	0.000217073	0.000506298	0.000144003	0.000139915	0.000419019	0.000189657	5.21486e-05	0.000322954
Carnitine O-acetyltransferase OS=Mus musculus OX=10090 GN=Crat PE=1 SV=3	sp|P47934|CACP_MOUSE	71	3	12	16	9	9	9	14	12	0.0422535	0.169014	0.225352	0.126761	0.126761	0.126761	0.197183	0.169014	0.000153305	0.000435298	0.000542402	0.000345845	0.000345248	0.00028128	0.00040103	0.000336121
Ig heavy chain V region 441 OS=Mus musculus OX=10090 PE=4 SV=1	sp|P01806|HVM36_MOUSE (+2)	13	6	8	15	11	9	6	16	9	0.461538	0.615385	1.15385	0.846154	0.692308	0.461538	1.23077	0.692308	0.00167457	0.00158493	0.0027772	0.00230859	0.00188559	0.00102415	0.00250313	0.0013768
Cytochrome c oxidase subunit 2 OS=Mus musculus OX=10090 GN=Mtco2 PE=1 SV=1	sp|P00405|COX2_MOUSE	26	6	9	9	7	16	10	19	12	0.230769	0.346154	0.346154	0.269231	0.615385	0.384615	0.730769	0.461538	0.000837283	0.000891524	0.000833161	0.000734551	0.00167608	0.000853456	0.00148624	0.000917869
Bifunctional glutamate/proline--tRNA ligase OS=Mus musculus OX=10090 GN=Eprs1 PE=1 SV=4	sp|Q8CGC7|SYEP_MOUSE	170	0	6	4	6	7	10	10	11	0	0.0352941	0.0235294	0.0352941	0.0411765	0.0588235	0.0588235	0.0647059	0	9.09005e-05	5.66332e-05	9.62941e-05	0.000112149	0.000130529	0.000119635	0.000128682
60S ribosomal protein L26 OS=Mus musculus OX=10090 GN=Rpl26 PE=1 SV=1	sp|P61255|RL26_MOUSE	17	4	9	12	8	9	14	16	19	0.235294	0.529412	0.705882	0.470588	0.529412	0.823529	0.941176	1.11765	0.0008537	0.00136351	0.001699	0.00128392	0.00144192	0.0018274	0.00191416	0.00222268
Histone H3.3C OS=Mus musculus OX=10090 GN=H3-5 PE=3 SV=3	sp|P02301|H3C_MOUSE (+3)	15	11	6	3	6	7	7	8	10	0.733333	0.4	0.2	0.4	0.466667	0.466667	0.533333	0.666667	0.0026607	0.00103021	0.000481382	0.00109133	0.00127102	0.00103553	0.00108469	0.00132581
Fatty acid-binding protein, adipocyte OS=Mus musculus OX=10090 GN=Fabp4 PE=1 SV=3	sp|P04117|FABP4_MOUSE	15	8	9	14	11	10	16	14	12	0.533333	0.6	0.933333	0.733333	0.666667	1.06667	0.933333	0.8	0.00193505	0.00154531	0.00224645	0.00200078	0.00181575	0.00236692	0.00189821	0.00159097
NADH dehydrogenase [ubiquinone] iron-sulfur protein 8, mitochondrial OS=Mus musculus OX=10090 GN=Ndufs8 PE=1 SV=1	sp|Q8K3J1|NDUS8_MOUSE	24	10	10	8	7	14	12	21	15	0.416667	0.416667	0.333333	0.291667	0.583333	0.5	0.875	0.625	0.00151176	0.00107313	0.000802304	0.000795764	0.00158878	0.00110949	0.00177957	0.00124295
Protein phosphatase 1 regulatory subunit 3A OS=Mus musculus OX=10090 GN=Ppp1r3a PE=1 SV=2	sp|Q99MR9|PPR3A_MOUSE	121	0	0	0	0	5	27	31	26	0	0	0	0	0.0413223	0.22314	0.256198	0.214876	0	0	0	0	0.000112546	0.000495145	0.000521055	0.000427328
40S ribosomal protein S16 OS=Mus musculus OX=10090 GN=Rps16 PE=1 SV=4	sp|P14131|RS16_MOUSE	16	8	15	11	6	10	12	16	16	0.5	0.9375	0.6875	0.375	0.625	0.75	1	1	0.00181411	0.00241454	0.00165475	0.00102313	0.00170226	0.00166424	0.0020338	0.00198872
CDGSH iron-sulfur domain-containing protein 1 OS=Mus musculus OX=10090 GN=Cisd1 PE=1 SV=1	sp|Q91WS0|CISD1_MOUSE	12	11	12	10	10	14	18	17	11	0.916667	1	0.833333	0.833333	1.16667	1.5	1.41667	0.916667	0.00332587	0.00257551	0.00200576	0.00227361	0.00317756	0.00332848	0.00288121	0.00182299
40S ribosomal protein S3 OS=Mus musculus OX=10090 GN=Rps3 PE=1 SV=1	sp|P62908|RS3_MOUSE	27	12	13	8	15	14	10	10	13	0.444444	0.481481	0.296296	0.555556	0.518519	0.37037	0.37037	0.481481	0.00161254	0.00124006	0.000713159	0.00151574	0.00141225	0.000821846	0.000753258	0.00095753
Ig lambda-1 chain C region OS=Mus musculus OX=10090 PE=1 SV=1	sp|P01843|LAC1_MOUSE	12	6	8	16	16	5	6	16	13	0.5	0.666667	1.33333	1.33333	0.416667	0.5	1.33333	1.08333	0.00181411	0.00171701	0.00320921	0.00363778	0.00113484	0.00110949	0.00271173	0.00215444
GrpE protein homolog 1, mitochondrial OS=Mus musculus OX=10090 GN=Grpel1 PE=1 SV=1	sp|Q99LP6|GRPE1_MOUSE	24	10	8	17	15	13	8	12	13	0.416667	0.333333	0.708333	0.625	0.541667	0.333333	0.5	0.541667	0.00151176	0.000858505	0.0017049	0.00170521	0.0014753	0.000739662	0.0010169	0.00107722
3-hydroxyacyl-CoA dehydrogenase type-2 OS=Mus musculus OX=10090 GN=Hsd17b10 PE=1 SV=4	sp|O08756|HCD2_MOUSE	27	6	5	7	6	18	12	26	19	0.222222	0.185185	0.259259	0.222222	0.666667	0.444444	0.962963	0.703704	0.000806272	0.000476947	0.000624014	0.000606296	0.00181575	0.000986216	0.00195847	0.00139947
60S ribosomal protein L6 OS=Mus musculus OX=10090 GN=Rpl6 PE=1 SV=3	sp|P47911|RL6_MOUSE	34	5	13	13	11	13	8	15	13	0.147059	0.382353	0.382353	0.323529	0.382353	0.235294	0.441176	0.382353	0.000533563	0.000984755	0.000920289	0.000882696	0.00104139	0.000522114	0.000897263	0.000760392
Histone H2B type 1-H OS=Mus musculus OX=10090 GN=H2bc9 PE=1 SV=3	sp|Q64478|H2B1H_MOUSE (+1)	14	13	9	8	8	7	18	6	14	0.928571	0.642857	0.571429	0.571429	0.5	1.28571	0.428571	1	0.00336907	0.00165569	0.00137538	0.00155905	0.00136181	0.00285298	0.000871627	0.00198872
60S ribosomal protein L8 OS=Mus musculus OX=10090 GN=Rpl8 PE=1 SV=2	sp|P62918|RL8_MOUSE	28	11	11	10	11	9	8	9	12	0.392857	0.392857	0.357143	0.392857	0.321429	0.285714	0.321429	0.428571	0.00142537	0.00101181	0.000859611	0.00107185	0.00087545	0.000633996	0.00065372	0.000852307
NADH dehydrogenase [ubiquinone] flavoprotein 2, mitochondrial OS=Mus musculus OX=10090 GN=Ndufv2 PE=1 SV=2	sp|Q9D6J6|NDUV2_MOUSE	27	5	7	11	5	14	13	18	15	0.185185	0.259259	0.407407	0.185185	0.518519	0.481481	0.666667	0.555556	0.000671894	0.000667726	0.000980593	0.000505247	0.00141225	0.0010684	0.00135586	0.00110484
Ig kappa chain V-V region MOPC 173 OS=Mus musculus OX=10090 PE=1 SV=1	sp|P01643|KV5AA_MOUSE	12	0	10	0	0	0	0	0	0	0	0.833333	0	0	0	0	0	0	0	0.00214626	0	0	0	0	0	0
NADH dehydrogenase [ubiquinone] 1 beta subcomplex subunit 4 OS=Mus musculus OX=10090 GN=Ndufb4 PE=1 SV=3	sp|Q9CQC7|NDUB4_MOUSE	15	6	13	9	10	12	15	12	14	0.4	0.866667	0.6	0.666667	0.8	1	0.8	0.933333	0.00145129	0.00223211	0.00144415	0.00181889	0.0021789	0.00221899	0.00162704	0.00185614
ATP synthase subunit epsilon, mitochondrial OS=Mus musculus OX=10090 GN=Atp5f1e PE=1 SV=2	sp|P56382|ATP5E_MOUSE	6	10	10	10	8	10	14	16	8	1.66667	1.66667	1.66667	1.33333	1.66667	2.33333	2.66667	1.33333	0.00604704	0.00429252	0.00401152	0.00363778	0.00453937	0.00517763	0.00542346	0.00265162
Cytochrome c oxidase subunit 5A, mitochondrial OS=Mus musculus OX=10090 GN=Cox5a PE=1 SV=2	sp|P12787|COX5A_MOUSE	16	10	11	9	8	10	11	13	9	0.625	0.6875	0.5625	0.5	0.625	0.6875	0.8125	0.5625	0.00226764	0.00177067	0.00135389	0.00136417	0.00170226	0.00152555	0.00165246	0.00111865
Ig kappa chain V-VI region TEPC 601/TEPC 191 OS=Mus musculus OX=10090 PE=1 SV=1	sp|P01677|KV6A3_MOUSE (+1)	12	8	5	9	6	8	8	11	7	0.666667	0.416667	0.75	0.5	0.666667	0.666667	0.916667	0.583333	0.00241882	0.00107313	0.00180518	0.00136417	0.00181575	0.00147932	0.00186431	0.00116008
Prelamin-A/C OS=Mus musculus OX=10090 GN=Lmna PE=1 SV=2	sp|P48678|LMNA_MOUSE	74	31	12	3	4	16	4	0	17	0.418919	0.162162	0.0405405	0.0540541	0.216216	0.0540541	0	0.22973	0.00151993	0.000417651	9.75775e-05	0.000147477	0.000588892	0.000119945	0	0.000456867
Protein-glutamine gamma-glutamyltransferase E OS=Mus musculus OX=10090 GN=Tgm3 PE=1 SV=2	sp|Q08189|TGM3_MOUSE	77	3	3	9	0	12	0	3	0	0.038961	0.038961	0.116883	0	0.155844	0	0.038961	0	0.000141359	0.000100345	0.000281327	0	0.000424461	0	7.92388e-05	0
Acidic leucine-rich nuclear phosphoprotein 32 family member B OS=Mus musculus OX=10090 GN=Anp32b PE=1 SV=1	sp|Q9EST5|AN32B_MOUSE	31	11	11	13	8	12	11	8	9	0.354839	0.354839	0.419355	0.258065	0.387097	0.354839	0.258065	0.290323	0.00128743	0.000913892	0.00100935	0.000704086	0.00105431	0.000787382	0.000524851	0.000577369
Transcription factor A, mitochondrial OS=Mus musculus OX=10090 GN=Tfam PE=1 SV=2	sp|P40630|TFAM_MOUSE	28	13	16	9	7	15	10	9	11	0.464286	0.571429	0.321429	0.25	0.535714	0.357143	0.321429	0.392857	0.00168453	0.00147172	0.00077365	0.000682083	0.00145908	0.000792495	0.00065372	0.000781282
Peroxiredoxin-5, mitochondrial OS=Mus musculus OX=10090 GN=Prdx5 PE=1 SV=2	sp|P99029|PRDX5_MOUSE	22	11	14	12	8	10	11	14	14	0.5	0.636364	0.545455	0.363636	0.454545	0.5	0.636364	0.636364	0.00181411	0.00163896	0.00131286	0.000992121	0.00123801	0.00110949	0.00129423	0.00126555
Acidic leucine-rich nuclear phosphoprotein 32 family member A OS=Mus musculus OX=10090 GN=Anp32a PE=1 SV=1	sp|O35381|AN32A_MOUSE	29	13	8	6	6	10	7	4	0	0.448276	0.275862	0.206897	0.206897	0.344828	0.241379	0.137931	0	0.00162645	0.000710487	0.000497982	0.000564483	0.000939181	0.000535617	0.000280524	0
Malate dehydrogenase, cytoplasmic OS=Mus musculus OX=10090 GN=Mdh1 PE=1 SV=3	sp|P14152|MDHC_MOUSE	37	6	11	12	14	11	9	11	12	0.162162	0.297297	0.324324	0.378378	0.297297	0.243243	0.297297	0.324324	0.000588361	0.000765693	0.00078062	0.00103234	0.000809726	0.000539753	0.000604642	0.000644989
NADH dehydrogenase [ubiquinone] iron-sulfur protein 3, mitochondrial OS=Mus musculus OX=10090 GN=Ndufs3 PE=1 SV=2	sp|Q9DCT2|NDUS3_MOUSE	30	8	6	7	11	17	13	16	12	0.266667	0.2	0.233333	0.366667	0.566667	0.433333	0.533333	0.4	0.000967527	0.000515103	0.000561613	0.00100039	0.00154339	0.00096156	0.00108469	0.000795487
Ferritin heavy chain OS=Mus musculus OX=10090 GN=Fth1 PE=1 SV=2	sp|P09528|FRIH_MOUSE	21	8	11	11	10	12	14	15	12	0.380952	0.52381	0.52381	0.47619	0.571429	0.666667	0.714286	0.571429	0.00138218	0.00134908	0.00126076	0.00129921	0.00155636	0.00147932	0.00145271	0.00113641
Collagen alpha-2(VI) chain OS=Mus musculus OX=10090 GN=Col6a2 PE=1 SV=3	sp|Q02788|CO6A2_MOUSE	110	9	16	6	9	17	9	8	8	0.0818182	0.145455	0.0545455	0.0818182	0.154545	0.0818182	0.0727273	0.0727273	0.000296855	0.00037462	0.000131286	0.000223227	0.000420924	0.000181553	0.000147912	0.000144634
Gamma-enolase OS=Mus musculus OX=10090 GN=Eno2 PE=1 SV=2	sp|P17183|ENOG_MOUSE	47	0	0	0	0	0	5	0	6	0	0	0	0	0	0.106383	0	0.12766	0	0	0	0	0	0.000236062	0	0.000253879
Ig kappa chain V-II region 26-10 OS=Mus musculus OX=10090 PE=1 SV=1	sp|P01631|KV2A7_MOUSE	12	7	10	8	11	6	11	10	10	0.583333	0.833333	0.666667	0.916667	0.5	0.916667	0.833333	0.833333	0.00211646	0.00214626	0.00160461	0.00250097	0.00136181	0.00203407	0.00169483	0.00165726
NADH dehydrogenase [ubiquinone] iron-sulfur protein 6, mitochondrial OS=Mus musculus OX=10090 GN=Ndufs6 PE=1 SV=2	sp|P52503|NDUS6_MOUSE	13	4	3	11	10	13	11	17	12	0.307692	0.230769	0.846154	0.769231	1	0.846154	1.30769	0.923077	0.00111638	0.000594349	0.00203662	0.00209872	0.00272362	0.0018776	0.00265958	0.00183574
40S ribosomal protein S7 OS=Mus musculus OX=10090 GN=Rps7 PE=2 SV=1	sp|P62082|RS7_MOUSE	22	5	11	10	12	8	12	12	11	0.227273	0.5	0.454545	0.545455	0.363636	0.545455	0.545455	0.5	0.000824597	0.00128776	0.00109405	0.00148818	0.000990409	0.00121036	0.00110934	0.000994358
Fumarate hydratase, mitochondrial OS=Mus musculus OX=10090 GN=Fh PE=1 SV=3	sp|P97807|FUMH_MOUSE	54	5	8	7	11	14	12	12	11	0.0925926	0.148148	0.12963	0.203704	0.259259	0.222222	0.222222	0.203704	0.000335947	0.000381558	0.000312007	0.000555772	0.000706125	0.000493108	0.000451955	0.000405109
Pyruvate dehydrogenase protein X component, mitochondrial OS=Mus musculus OX=10090 GN=Pdhx PE=1 SV=1	sp|Q8BKZ9|ODPX_MOUSE	54	7	5	10	9	7	8	12	11	0.12963	0.0925926	0.185185	0.166667	0.12963	0.148148	0.222222	0.203704	0.000470325	0.000238474	0.000445724	0.000454722	0.000353062	0.000328739	0.000451955	0.000405109
40S ribosomal protein S29 OS=Mus musculus OX=10090 GN=Rps29 PE=1 SV=2	sp|P62274|RS29_MOUSE	7	11	12	11	11	10	9	6	8	1.57143	1.71429	1.57143	1.57143	1.42857	1.28571	0.857143	1.14286	0.0057015	0.00441517	0.00378229	0.00428738	0.00389089	0.00285298	0.00174325	0.00227282
Caveolae-associated protein 4 OS=Mus musculus OX=10090 GN=Cavin4 PE=1 SV=1	sp|A2AMM0|CAVN4_MOUSE	41	9	10	10	12	12	11	10	13	0.219512	0.243902	0.243902	0.292683	0.292683	0.268293	0.243902	0.317073	0.00079644	0.000628174	0.000587051	0.000798537	0.000797158	0.000595337	0.000496048	0.000630569
Catalase OS=Mus musculus OX=10090 GN=Cat PE=1 SV=4	sp|P24270|CATA_MOUSE	60	2	7	11	9	15	7	13	15	0.0333333	0.116667	0.183333	0.15	0.25	0.116667	0.216667	0.25	0.000120941	0.000300477	0.000441267	0.00040925	0.000680906	0.000258882	0.000440656	0.000497179
ATP synthase subunit g, mitochondrial OS=Mus musculus OX=10090 GN=Atp5mg PE=1 SV=1	sp|Q9CPQ8|ATP5L_MOUSE	11	8	11	9	9	10	16	14	11	0.727273	1	0.818182	0.818182	0.909091	1.45455	1.27273	1	0.00263871	0.00257551	0.00196929	0.00223227	0.00247602	0.00322761	0.00258847	0.00198872
Ig kappa chain V-V region L6 (Fragment) OS=Mus musculus OX=10090 PE=4 SV=1	sp|P01638|KV5A6_MOUSE	13	9	9	9	10	8	7	9	10	0.692308	0.692308	0.692308	0.769231	0.615385	0.538462	0.692308	0.769231	0.00251185	0.00178305	0.00166632	0.00209872	0.00167608	0.00119484	0.00140801	0.00152978
CDGSH iron-sulfur domain-containing protein 3, mitochondrial OS=Mus musculus OX=10090 GN=Cisd3 PE=1 SV=1	sp|B1AR13|CISD3_MOUSE	16	4	11	13	10	8	10	11	8	0.25	0.6875	0.8125	0.625	0.5	0.625	0.6875	0.5	0.000907056	0.00177067	0.00195562	0.00170521	0.00136181	0.00138687	0.00139824	0.000994358
Isoleucine--tRNA ligase, mitochondrial OS=Mus musculus OX=10090 GN=Iars2 PE=1 SV=1	sp|Q8BIJ6|SYIM_MOUSE	113	5	2	15	6	12	9	14	11	0.0442478	0.0176991	0.132743	0.0530973	0.106195	0.079646	0.123894	0.0973451	0.000160541	4.55843e-05	0.000319501	0.000144867	0.000289234	0.000176733	0.000251975	0.000193592
Ig heavy chain V region 102 OS=Mus musculus OX=10090 PE=1 SV=1	sp|P01750|HVM06_MOUSE	13	0	7	0	4	4	7	8	7	0	0.538462	0	0.307692	0.307692	0.538462	0.615385	0.538462	0	0.00138682	0	0.000839487	0.000838038	0.00119484	0.00125157	0.00107085
Methylcrotonoyl-CoA carboxylase beta chain, mitochondrial OS=Mus musculus OX=10090 GN=Mccc2 PE=1 SV=1	sp|Q3ULD5|MCCB_MOUSE	61	0	4	7	7	17	14	19	15	0	0.0655738	0.114754	0.114754	0.278689	0.229508	0.311475	0.245902	0	0.000168886	0.000276203	0.000313087	0.000759043	0.000509275	0.000633478	0.000489029
40S ribosomal protein S20 OS=Mus musculus OX=10090 GN=Rps20 PE=1 SV=1	sp|P60867|RS20_MOUSE	13	10	11	7	6	8	14	13	13	0.769231	0.846154	0.538462	0.461538	0.615385	1.07692	1	1	0.00279094	0.00217928	0.00129603	0.00125923	0.00167608	0.00238968	0.0020338	0.00198872
60S ribosomal protein L12 OS=Mus musculus OX=10090 GN=Rpl12 PE=1 SV=2	sp|P35979|RL12_MOUSE	18	7	8	13	6	9	9	12	13	0.388889	0.444444	0.722222	0.333333	0.5	0.5	0.666667	0.722222	0.00141098	0.00114467	0.00173832	0.000909444	0.00136181	0.00110949	0.00135586	0.0014363
60S ribosomal protein L10-like OS=Mus musculus OX=10090 GN=Rpl10l PE=2 SV=1	sp|P86048|RL10L_MOUSE (+1)	25	5	10	8	5	8	9	8	14	0.2	0.4	0.32	0.2	0.32	0.36	0.32	0.56	0.000725645	0.00103021	0.000770211	0.000545667	0.00087156	0.000798835	0.000650815	0.00111368
Adenylate kinase isoenzyme 1 OS=Mus musculus OX=10090 GN=Ak1 PE=1 SV=1	sp|Q9R0Y5|KAD1_MOUSE	22	7	9	11	4	12	12	15	14	0.318182	0.409091	0.5	0.181818	0.545455	0.545455	0.681818	0.636364	0.00115444	0.00105362	0.00120346	0.000496061	0.00148561	0.00121036	0.00138668	0.00126555
Histone H2A type 2-C OS=Mus musculus OX=10090 GN=H2ac20 PE=1 SV=3	sp|Q64523|H2A2C_MOUSE (+1)	14	10	7	5	4	2	5	2	10	0.714286	0.5	0.357143	0.285714	0.142857	0.357143	0.142857	0.714286	0.00259159	0.00128776	0.000859611	0.000779524	0.000389089	0.000792495	0.000290542	0.00142051
Dynamin-like 120 kDa protein, mitochondrial OS=Mus musculus OX=10090 GN=Opa1 PE=1 SV=1	sp|P58281|OPA1_MOUSE	111	4	7	10	7	5	9	14	8	0.036036	0.0630631	0.0900901	0.0630631	0.045045	0.0810811	0.126126	0.0720721	0.000130747	0.00016242	0.000216839	0.000172057	0.000122686	0.000179918	0.000256515	0.000143331
Ferrochelatase, mitochondrial OS=Mus musculus OX=10090 GN=Fech PE=1 SV=2	sp|P22315|HEMH_MOUSE	47	7	7	8	8	15	9	13	13	0.148936	0.148936	0.170213	0.170213	0.319149	0.191489	0.276596	0.276596	0.000540374	0.000383587	0.000409687	0.000464397	0.000869242	0.000424912	0.00056254	0.000550071
Voltage-dependent anion-selective channel protein 1 OS=Mus musculus OX=10090 GN=Vdac1 PE=1 SV=3	sp|Q60932|VDAC1_MOUSE	32	2	9	4	5	5	4	6	9	0.0625	0.28125	0.125	0.15625	0.15625	0.125	0.1875	0.28125	0.000226764	0.000724363	0.000300864	0.000426302	0.000425566	0.000277373	0.000381337	0.000559327
Cytochrome c, somatic OS=Mus musculus OX=10090 GN=Cycs PE=1 SV=2	sp|P62897|CYC_MOUSE	12	2	9	12	5	9	18	15	7	0.166667	0.75	1	0.416667	0.75	1.5	1.25	0.583333	0.000604704	0.00193164	0.00240691	0.00113681	0.00204272	0.00332848	0.00254225	0.00116008
AFG3-like protein 2 OS=Mus musculus OX=10090 GN=Afg3l2 PE=1 SV=1	sp|Q8JZQ2|AFG32_MOUSE	90	0	3	11	5	9	12	10	13	0	0.0333333	0.122222	0.0555556	0.1	0.133333	0.111111	0.144444	0	8.58505e-05	0.000294178	0.000151574	0.000272362	0.000295865	0.000225977	0.000287259
Ig heavy chain V region 1-72 OS=Mus musculus OX=10090 GN=Ighv1-72 PE=1 SV=2	sp|P06328|HVM49_MOUSE	13	3	11	4	4	4	7	4	8	0.230769	0.846154	0.307692	0.307692	0.307692	0.538462	0.307692	0.615385	0.000837283	0.00217928	0.000740588	0.000839487	0.000838038	0.00119484	0.000625784	0.00122383
Ig kappa chain V-V region K2 (Fragment) OS=Mus musculus OX=10090 PE=1 SV=1	sp|P01635|KV5A3_MOUSE	13	3	14	11	7	6	14	10	9	0.230769	1.07692	0.846154	0.538462	0.461538	1.07692	0.769231	0.692308	0.000837283	0.00277363	0.00203662	0.0014691	0.00125706	0.00238968	0.00156446	0.0013768
60S ribosomal protein L27 OS=Mus musculus OX=10090 GN=Rpl27 PE=1 SV=2	sp|P61358|RL27_MOUSE	16	7	11	7	6	7	8	12	11	0.4375	0.6875	0.4375	0.375	0.4375	0.5	0.75	0.6875	0.00158735	0.00177067	0.00105302	0.00102313	0.00119159	0.00110949	0.00152535	0.00136724
Dehydrogenase/reductase SDR family member 4 OS=Mus musculus OX=10090 GN=Dhrs4 PE=1 SV=3	sp|Q99LB2|DHRS4_MOUSE	30	7	7	7	14	8	9	9	11	0.233333	0.233333	0.233333	0.466667	0.266667	0.3	0.3	0.366667	0.000846586	0.000600953	0.000561613	0.00127322	0.0007263	0.000665696	0.000610139	0.000729196
Ubiquitin-like modifier-activating enzyme 1 OS=Mus musculus OX=10090 GN=Uba1 PE=1 SV=1	sp|Q02053|UBA1_MOUSE	118	2	9	14	9	11	7	11	17	0.0169492	0.0762712	0.118644	0.0762712	0.0932203	0.059322	0.0932203	0.144068	6.14953e-05	0.000196438	0.000285566	0.000208093	0.000253897	0.000131635	0.000189591	0.00028651
Troponin T, cardiac muscle OS=Mus musculus OX=10090 GN=Tnnt2 PE=1 SV=2	sp|P50752|TNNT2_MOUSE	36	7	14	4	9	11	8	6	15	0.194444	0.388889	0.111111	0.25	0.305556	0.222222	0.166667	0.416667	0.000705488	0.00100159	0.000267435	0.000682083	0.000832218	0.000493108	0.000338966	0.000828632
Annexin A6 OS=Mus musculus OX=10090 GN=Anxa6 PE=1 SV=3	sp|P14824|ANXA6_MOUSE	76	0	6	12	10	12	13	11	16	0	0.0789474	0.157895	0.131579	0.157895	0.171053	0.144737	0.210526	0	0.00020333	0.000380039	0.000358991	0.000430046	0.000379563	0.000294365	0.000418677
Adhesion G-protein coupled receptor V1 OS=Mus musculus OX=10090 GN=Adgrv1 PE=1 SV=1	sp|Q8VHN7|AGRV1_MOUSE	687	3	2	0	0	0	0	0	0	0.00436681	0.00291121	0	0	0	0	0	0	1.58438e-05	7.49786e-06	0	0	0	0	0	0
Ig kappa chain V region Mem5 (Fragment) OS=Mus musculus OX=10090 PE=1 SV=1	sp|P84750|KVM5_MOUSE	13	0	0	6	0	0	2	2	3	0	0	0.461538	0	0	0.153846	0.153846	0.230769	0	0	0.00111088	0	0	0.000341382	0.000312892	0.000458935
Four and a half LIM domains protein 1 OS=Mus musculus OX=10090 GN=Fhl1 PE=1 SV=3	sp|P97447|FHL1_MOUSE	32	7	12	9	13	8	6	7	9	0.21875	0.375	0.28125	0.40625	0.25	0.1875	0.21875	0.28125	0.000793674	0.000965818	0.000676944	0.00110839	0.000680906	0.00041606	0.000444893	0.000559327
60S ribosomal protein L11 OS=Mus musculus OX=10090 GN=Rpl11 PE=1 SV=4	sp|Q9CXW4|RL11_MOUSE	20	6	8	9	5	9	11	10	13	0.3	0.4	0.45	0.25	0.45	0.55	0.5	0.65	0.00108847	0.00103021	0.00108311	0.000682083	0.00122563	0.00122044	0.0010169	0.00129267
Filamin-A OS=Mus musculus OX=10090 GN=Flna PE=1 SV=5	sp|Q8BTM8|FLNA_MOUSE	281	0	7	6	6	16	8	6	5	0	0.024911	0.0213523	0.0213523	0.0569395	0.0284698	0.0213523	0.0177936	0	6.41587e-05	5.13931e-05	5.82562e-05	0.000155082	6.3174e-05	4.34263e-05	3.53864e-05
Phospholipid hydroperoxide glutathione peroxidase OS=Mus musculus OX=10090 GN=Gpx4 PE=1 SV=4	sp|O70325|GPX4_MOUSE	22	8	9	12	2	9	8	12	8	0.363636	0.409091	0.545455	0.0909091	0.409091	0.363636	0.545455	0.363636	0.00131935	0.00105362	0.00131286	0.00024803	0.00111421	0.000806904	0.00110934	0.00072317
28S ribosomal protein S22, mitochondrial OS=Mus musculus OX=10090 GN=Mrps22 PE=1 SV=1	sp|Q9CXW2|RT22_MOUSE	41	3	3	2	3	0	4	5	7	0.0731707	0.0731707	0.0487805	0.0731707	0	0.097561	0.121951	0.170732	0.00026548	0.000188452	0.00011741	0.000199634	0	0.000216486	0.000248024	0.000339537
F-box only protein 50 OS=Mus musculus OX=10090 GN=Nccrp1 PE=1 SV=2	sp|G3X9C2|FBX50_MOUSE	30	4	4	9	3	5	7	4	3	0.133333	0.133333	0.3	0.1	0.166667	0.233333	0.133333	0.1	0.000483763	0.000343402	0.000722073	0.000272833	0.000453937	0.000517763	0.000271173	0.000198872
Chloride intracellular channel protein 4 OS=Mus musculus OX=10090 GN=Clic4 PE=1 SV=3	sp|Q9QYB1|CLIC4_MOUSE	29	0	0	0	0	2	2	2	2	0	0	0	0	0.0689655	0.0689655	0.0689655	0.0689655	0	0	0	0	0.000187836	0.000153033	0.000140262	0.000137153
Ig kappa chain V-V region MOPC 21 OS=Mus musculus OX=10090 PE=1 SV=1	sp|P01634|KV5A2_MOUSE	15	3	3	3	3	0	3	3	0	0.2	0.2	0.2	0.2	0	0.2	0.2	0	0.000725645	0.000515103	0.000481382	0.000545667	0	0.000443797	0.000406759	0
40S ribosomal protein S13 OS=Mus musculus OX=10090 GN=Rps13 PE=1 SV=2	sp|P62301|RS13_MOUSE	17	3	12	13	5	13	11	10	6	0.176471	0.705882	0.764706	0.294118	0.764706	0.647059	0.588235	0.352941	0.000640275	0.00181801	0.00184058	0.000802451	0.00208277	0.00143581	0.00119635	0.0007019
Carbonyl reductase family member 4 OS=Mus musculus OX=10090 GN=Cbr4 PE=1 SV=2	sp|Q91VT4|CBR4_MOUSE	25	10	5	9	10	11	10	10	8	0.4	0.2	0.36	0.4	0.44	0.4	0.4	0.32	0.00145129	0.000515103	0.000866488	0.00109133	0.00119839	0.000887594	0.000813519	0.000636389
60S ribosomal protein L7a OS=Mus musculus OX=10090 GN=Rpl7a PE=1 SV=2	sp|P12970|RL7A_MOUSE	30	0	12	12	10	5	6	13	10	0	0.4	0.4	0.333333	0.166667	0.2	0.433333	0.333333	0	0.00103021	0.000962764	0.000909444	0.000453937	0.000443797	0.000881312	0.000662906
Elongin-B OS=Mus musculus OX=10090 GN=Elob PE=1 SV=1	sp|P62869|ELOB_MOUSE	13	8	11	11	5	9	11	10	10	0.615385	0.846154	0.846154	0.384615	0.692308	0.846154	0.769231	0.769231	0.00223275	0.00217928	0.00203662	0.00104936	0.00188559	0.0018776	0.00156446	0.00152978
Lipoamide acyltransferase component of branched-chain alpha-keto acid dehydrogenase complex, mitochondrial OS=Mus musculus OX=10090 GN=Dbt PE=1 SV=2	sp|P53395|ODB2_MOUSE	53	5	7	11	5	8	11	14	11	0.0943396	0.132075	0.207547	0.0943396	0.150943	0.207547	0.264151	0.207547	0.000342285	0.000340162	0.000499548	0.00025739	0.000411113	0.000460544	0.000537229	0.000412753
Ig lambda-2 chain C region OS=Mus musculus OX=10090 GN=Iglc2 PE=1 SV=1	sp|P01844|LAC2_MOUSE	11	6	12	12	11	4	8	7	9	0.545455	1.09091	1.09091	1	0.363636	0.727273	0.636364	0.818182	0.00197903	0.00280965	0.00262572	0.00272833	0.000990409	0.00161381	0.00129423	0.00162713
Arginase-1 OS=Mus musculus OX=10090 GN=Arg1 PE=1 SV=1	sp|Q61176|ARGI1_MOUSE	35	6	4	9	3	3	5	3	0	0.171429	0.114286	0.257143	0.0857143	0.0857143	0.142857	0.0857143	0	0.000621981	0.000294344	0.00061892	0.000233857	0.000233453	0.000316998	0.000174325	0
ADP-ribosylation factor 3 OS=Mus musculus OX=10090 GN=Arf3 PE=2 SV=2	sp|P61205|ARF3_MOUSE	21	6	6	4	2	7	10	12	8	0.285714	0.285714	0.190476	0.0952381	0.333333	0.47619	0.571429	0.380952	0.00103664	0.000735861	0.000458459	0.000259841	0.000907874	0.00105666	0.00116217	0.000757606
Ig kappa chain V-III region PC 7043 OS=Mus musculus OX=10090 PE=1 SV=1	sp|P01665|KV3AD_MOUSE (+1)	12	0	8	5	11	0	7	6	12	0	0.666667	0.416667	0.916667	0	0.583333	0.5	1	0	0.00171701	0.00100288	0.00250097	0	0.00129441	0.0010169	0.00198872
40S ribosomal protein S15a OS=Mus musculus OX=10090 GN=Rps15a PE=1 SV=2	sp|P62245|RS15A_MOUSE	15	6	7	9	6	8	8	7	12	0.4	0.466667	0.6	0.4	0.533333	0.533333	0.466667	0.8	0.00145129	0.00120191	0.00144415	0.00109133	0.0014526	0.00118346	0.000949105	0.00159097
CD5 antigen-like OS=Mus musculus OX=10090 GN=Cd5l PE=1 SV=3	sp|Q9QWK4|CD5L_MOUSE	39	3	12	8	13	8	5	7	8	0.0769231	0.307692	0.205128	0.333333	0.205128	0.128205	0.179487	0.205128	0.000279094	0.000792466	0.000493725	0.000909444	0.000558692	0.000284485	0.00036504	0.000407942
Gasdermin-A OS=Mus musculus OX=10090 GN=Gsdma PE=2 SV=1	sp|Q9EST1|GSDMA_MOUSE	50	8	5	5	2	6	3	0	0	0.16	0.1	0.1	0.04	0.12	0.06	0	0	0.000580516	0.000257551	0.000240691	0.000109133	0.000326835	0.000133139	0	0
Parkinson disease protein 7 homolog OS=Mus musculus OX=10090 GN=Park7 PE=1 SV=1	sp|Q99LX0|PARK7_MOUSE	20	5	9	8	8	10	9	9	10	0.25	0.45	0.4	0.4	0.5	0.45	0.45	0.5	0.000907056	0.00115898	0.000962764	0.00109133	0.00136181	0.000998543	0.000915209	0.000994358
Major vault protein OS=Mus musculus OX=10090 GN=Mvp PE=1 SV=4	sp|Q9EQK5|MVP_MOUSE	96	5	6	5	4	12	13	11	13	0.0520833	0.0625	0.0520833	0.0416667	0.125	0.135417	0.114583	0.135417	0.00018897	0.00016097	0.00012536	0.000113681	0.000340453	0.000300488	0.000233039	0.000269305
Biglycan OS=Mus musculus OX=10090 GN=Bgn PE=1 SV=1	sp|P28653|PGS1_MOUSE	42	4	9	8	6	9	5	10	9	0.0952381	0.214286	0.190476	0.142857	0.214286	0.119048	0.238095	0.214286	0.000345545	0.000551896	0.000458459	0.000389762	0.000583634	0.000264165	0.000484237	0.000426154
Voltage-dependent anion-selective channel protein 3 OS=Mus musculus OX=10090 GN=Vdac3 PE=1 SV=1	sp|Q60931|VDAC3_MOUSE	31	0	0	2	2	4	6	9	7	0	0	0.0645161	0.0645161	0.129032	0.193548	0.290323	0.225806	0	0	0.000155285	0.000176022	0.000351435	0.000429481	0.000590457	0.000449065
60S ribosomal protein L15 OS=Mus musculus OX=10090 GN=Rpl15 PE=1 SV=4	sp|Q9CZM2|RL15_MOUSE	24	2	5	14	4	4	4	10	12	0.0833333	0.208333	0.583333	0.166667	0.166667	0.166667	0.416667	0.5	0.000302352	0.000536565	0.00140403	0.000454722	0.000453937	0.000369831	0.000847415	0.000994358
Ig heavy chain V region 36-65 OS=Mus musculus OX=10090 PE=1 SV=1	sp|P01747|HVM03_MOUSE	13	7	6	4	4	3	0	3	3	0.538462	0.461538	0.307692	0.307692	0.230769	0	0.230769	0.230769	0.00195366	0.0011887	0.000740588	0.000839487	0.000628528	0	0.000469338	0.000458935
Complement C4-B OS=Mus musculus OX=10090 GN=C4b PE=1 SV=3	sp|P01029|CO4B_MOUSE	193	0	7	9	8	2	7	10	14	0	0.0362694	0.0466321	0.0414508	0.0103627	0.0362694	0.0518135	0.0725389	0	9.34124e-05	0.000112239	0.000113092	2.82241e-05	8.04813e-05	0.000105378	0.000144259
Hydroxysteroid dehydrogenase-like protein 2 OS=Mus musculus OX=10090 GN=Hsdl2 PE=1 SV=1	sp|Q2TPA8|HSDL2_MOUSE	54	0	8	12	6	12	7	11	9	0	0.148148	0.222222	0.111111	0.222222	0.12963	0.203704	0.166667	0	0.000381558	0.000534869	0.000303148	0.00060525	0.000287646	0.000414292	0.000331453
Heterogeneous nuclear ribonucleoprotein U OS=Mus musculus OX=10090 GN=Hnrnpu PE=1 SV=1	sp|Q8VEK3|HNRPU_MOUSE	88	4	9	11	7	6	5	7	11	0.0454545	0.102273	0.125	0.0795455	0.0681818	0.0568182	0.0795455	0.125	0.000164919	0.000263405	0.000300864	0.000217027	0.000185702	0.000126079	0.000161779	0.00024859
ATP synthase subunit f, mitochondrial OS=Mus musculus OX=10090 GN=Atp5mf PE=1 SV=3	sp|P56135|ATPK_MOUSE	10	4	6	7	4	4	8	5	3	0.4	0.6	0.7	0.4	0.4	0.8	0.5	0.3	0.00145129	0.00154531	0.00168484	0.00109133	0.00108945	0.00177519	0.0010169	0.000596615
60S ribosomal protein L35a OS=Mus musculus OX=10090 GN=Rpl35a PE=1 SV=2	sp|O55142|RL35A_MOUSE	13	5	9	6	6	7	7	9	10	0.384615	0.692308	0.461538	0.461538	0.538462	0.538462	0.692308	0.769231	0.00139547	0.00178305	0.00111088	0.00125923	0.00146657	0.00119484	0.00140801	0.00152978
Laminin subunit alpha-2 OS=Mus musculus OX=10090 GN=Lama2 PE=1 SV=2	sp|Q60675|LAMA2_MOUSE	344	3	17	0	4	24	0	0	5	0.00872093	0.0494186	0	0.0116279	0.0697674	0	0	0.0145349	3.16415e-05	0.000127278	0	3.17248e-05	0.00019002	0	0	2.89058e-05
Myosin regulatory light chain 12B OS=Mus musculus OX=10090 GN=Myl12b PE=1 SV=2	sp|Q3THE2|ML12B_MOUSE	20	8	8	5	10	8	8	6	9	0.4	0.4	0.25	0.5	0.4	0.4	0.3	0.45	0.00145129	0.00103021	0.000601728	0.00136417	0.00108945	0.000887594	0.000610139	0.000894923
Caveolae-associated protein 2 OS=Mus musculus OX=10090 GN=Cavin2 PE=1 SV=3	sp|Q63918|CAVN2_MOUSE	47	0	7	8	4	5	8	10	9	0	0.148936	0.170213	0.0851064	0.106383	0.170213	0.212766	0.191489	0	0.000383587	0.000409687	0.000232199	0.000289747	0.0003777	0.000432723	0.000380818
S-phase kinase-associated protein 1 OS=Mus musculus OX=10090 GN=Skp1 PE=1 SV=3	sp|Q9WTX5|SKP1_MOUSE	19	6	9	13	4	6	8	8	7	0.315789	0.473684	0.684211	0.210526	0.315789	0.421053	0.421053	0.368421	0.00114576	0.00121998	0.00164683	0.000574386	0.000860092	0.00093431	0.000856336	0.000732685
Histone H2B type 3-B OS=Mus musculus OX=10090 GN=H2bu1 PE=1 SV=3	sp|Q8CGP0|H2B3B_MOUSE (+1)	14	0	0	0	0	0	0	0	10	0	0	0	0	0	0	0	0.714286	0	0	0	0	0	0	0	0.00142051
ATP synthase-coupling factor 6, mitochondrial OS=Mus musculus OX=10090 GN=Atp5pf PE=1 SV=1	sp|P97450|ATP5J_MOUSE	12	10	6	5	5	7	8	10	9	0.833333	0.5	0.416667	0.416667	0.583333	0.666667	0.833333	0.75	0.00302352	0.00128776	0.00100288	0.00113681	0.00158878	0.00147932	0.00169483	0.00149154
60S ribosomal protein L31 OS=Mus musculus OX=10090 GN=Rpl31 PE=1 SV=1	sp|P62900|RL31_MOUSE	14	7	11	7	6	7	11	7	7	0.5	0.785714	0.5	0.428571	0.5	0.785714	0.5	0.5	0.00181411	0.00202362	0.00120346	0.00116929	0.00136181	0.00174349	0.0010169	0.000994358
Nexilin OS=Mus musculus OX=10090 GN=Nexn PE=1 SV=3	sp|Q7TPW1|NEXN_MOUSE	72	3	12	4	5	9	0	0	21	0.0416667	0.166667	0.0555556	0.0694444	0.125	0	0	0.291667	0.000151176	0.000429252	0.000133717	0.000189468	0.000340453	0	0	0.000580042
Asporin OS=Mus musculus OX=10090 GN=Aspn PE=1 SV=1	sp|Q99MQ4|ASPN_MOUSE	43	6	12	6	9	12	4	3	11	0.139535	0.27907	0.139535	0.209302	0.27907	0.0930233	0.0697674	0.255814	0.000506264	0.000718748	0.000335848	0.000571047	0.000760081	0.000206417	0.000141893	0.000508742
60S ribosomal protein L23a OS=Mus musculus OX=10090 GN=Rpl23a PE=1 SV=1	sp|P62751|RL23A_MOUSE	18	7	8	7	5	7	10	10	15	0.388889	0.444444	0.388889	0.277778	0.388889	0.555556	0.555556	0.833333	0.00141098	0.00114467	0.000936021	0.00075787	0.00105919	0.00123277	0.00112989	0.00165726
Atypical kinase COQ8A, mitochondrial OS=Mus musculus OX=10090 GN=Coq8a PE=1 SV=2	sp|Q60936|COQ8A_MOUSE	72	3	3	4	2	8	6	10	6	0.0416667	0.0416667	0.0555556	0.0277778	0.111111	0.0833333	0.138889	0.0833333	0.000151176	0.000107313	0.000133717	7.5787e-05	0.000302625	0.000184915	0.000282472	0.000165726
Thioredoxin-dependent peroxide reductase, mitochondrial OS=Mus musculus OX=10090 GN=Prdx3 PE=1 SV=1	sp|P20108|PRDX3_MOUSE	28	6	7	7	4	10	7	12	12	0.214286	0.25	0.25	0.142857	0.357143	0.25	0.428571	0.428571	0.000777477	0.000643878	0.000601728	0.000389762	0.000972723	0.000554746	0.000871627	0.000852307
Mitochondrial pyruvate carrier 1 OS=Mus musculus OX=10090 GN=Mpc1 PE=1 SV=1	sp|P63030|MPC1_MOUSE	12	6	7	8	3	7	9	7	7	0.5	0.583333	0.666667	0.25	0.583333	0.75	0.583333	0.583333	0.00181411	0.00150238	0.00160461	0.000682083	0.00158878	0.00166424	0.00118638	0.00116008
Laminin subunit gamma-1 OS=Mus musculus OX=10090 GN=Lamc1 PE=1 SV=2	sp|P02468|LAMC1_MOUSE	177	9	13	3	7	22	0	0	8	0.0508475	0.0734463	0.0169492	0.039548	0.124294	0	0	0.0451977	0.000184486	0.000189162	4.07951e-05	0.0001079	0.000338529	0	0	8.98855e-05
Ig kappa chain V-VI region NQ6-8.3.1 OS=Mus musculus OX=10090 PE=2 SV=1	sp|P04943|KV6A9_MOUSE	12	5	8	10	8	5	6	8	8	0.416667	0.666667	0.833333	0.666667	0.416667	0.5	0.666667	0.666667	0.00151176	0.00171701	0.00200576	0.00181889	0.00113484	0.00110949	0.00135586	0.00132581
Destrin OS=Mus musculus OX=10090 GN=Dstn PE=1 SV=3	sp|Q9R0P5|DEST_MOUSE	19	5	5	8	4	6	5	9	10	0.263158	0.263158	0.421053	0.210526	0.315789	0.263158	0.473684	0.526316	0.000954796	0.000677767	0.00101344	0.000574386	0.000860092	0.000583943	0.000963377	0.00104669
GMP reductase 1 OS=Mus musculus OX=10090 GN=Gmpr PE=1 SV=1	sp|Q9DCZ1|GMPR1_MOUSE	37	7	6	5	7	9	8	10	8	0.189189	0.162162	0.135135	0.189189	0.243243	0.216216	0.27027	0.216216	0.000686421	0.000417651	0.000325258	0.000516171	0.000662503	0.000479781	0.000549675	0.000429993
Heat shock protein beta-1 OS=Mus musculus OX=10090 GN=Hspb1 PE=1 SV=3	sp|P14602|HSPB1_MOUSE	23	13	7	4	7	6	4	7	5	0.565217	0.304348	0.173913	0.304348	0.26087	0.173913	0.304348	0.217391	0.00205074	0.000783852	0.000418593	0.000830362	0.00071051	0.00038591	0.000618982	0.00043233
60S ribosomal protein L5 OS=Mus musculus OX=10090 GN=Rpl5 PE=1 SV=3	sp|P47962|RL5_MOUSE	34	4	11	9	6	5	4	6	13	0.117647	0.323529	0.264706	0.176471	0.147059	0.117647	0.176471	0.382353	0.00042685	0.000833255	0.000637123	0.000481471	0.000400533	0.000261057	0.000358905	0.000760392
60S ribosomal protein L28 OS=Mus musculus OX=10090 GN=Rpl28 PE=1 SV=2	sp|P41105|RL28_MOUSE	16	2	7	10	0	4	7	13	11	0.125	0.4375	0.625	0	0.25	0.4375	0.8125	0.6875	0.000453528	0.00112679	0.00150432	0	0.000680906	0.000970806	0.00165246	0.00136724
Cytochrome c oxidase subunit 6B1 OS=Mus musculus OX=10090 GN=Cox6b1 PE=1 SV=2	sp|P56391|CX6B1_MOUSE	10	5	8	9	4	7	13	10	5	0.5	0.8	0.9	0.4	0.7	1.3	1	0.5	0.00181411	0.00206041	0.00216622	0.00109133	0.00190654	0.00288468	0.0020338	0.000994358
Nidogen-1 OS=Mus musculus OX=10090 GN=Nid1 PE=1 SV=2	sp|P10493|NID1_MOUSE	137	3	13	5	3	17	7	4	8	0.0218978	0.0948905	0.0364964	0.0218978	0.124088	0.0510949	0.0291971	0.0583942	7.94502e-05	0.000244392	8.78435e-05	5.97445e-05	0.000337968	0.000113379	5.93809e-05	0.000116129
Transcriptional activator protein Pur-alpha OS=Mus musculus OX=10090 GN=Pura PE=1 SV=1	sp|P42669|PURA_MOUSE	35	3	4	4	5	4	6	5	6	0.0857143	0.114286	0.114286	0.142857	0.114286	0.171429	0.142857	0.171429	0.000310991	0.000294344	0.000275076	0.000389762	0.000311271	0.000380397	0.000290542	0.000340923
Phosphoglycerate mutase 2 OS=Mus musculus OX=10090 GN=Pgam2 PE=1 SV=3	sp|O70250|PGAM2_MOUSE	29	7	5	7	8	11	7	7	10	0.241379	0.172414	0.241379	0.275862	0.37931	0.241379	0.241379	0.344828	0.000875778	0.000444054	0.000580978	0.000752644	0.0010331	0.000535617	0.000490916	0.000685764
Isovaleryl-CoA dehydrogenase, mitochondrial OS=Mus musculus OX=10090 GN=Ivd PE=1 SV=1	sp|Q9JHI5|IVD_MOUSE	46	3	5	5	7	8	10	13	10	0.0652174	0.108696	0.108696	0.152174	0.173913	0.217391	0.282609	0.217391	0.000236623	0.000279947	0.000261621	0.000415181	0.000473674	0.000482388	0.000574769	0.00043233
Laminin subunit beta-2 OS=Mus musculus OX=10090 GN=Lamb2 PE=1 SV=2	sp|Q61292|LAMB2_MOUSE	197	8	14	2	5	17	0	0	6	0.0406091	0.071066	0.0101523	0.0253807	0.0862944	0	0	0.0304569	0.000147339	0.000183031	2.44356e-05	6.9247e-05	0.000235033	0	0	6.05701e-05
2,4-dienoyl-CoA reductase, mitochondrial OS=Mus musculus OX=10090 GN=Decr1 PE=1 SV=1	sp|Q9CQ62|DECR_MOUSE	36	3	4	8	5	4	11	9	5	0.0833333	0.111111	0.222222	0.138889	0.111111	0.305556	0.25	0.138889	0.000302352	0.000286168	0.000534869	0.000378935	0.000302625	0.000678023	0.000508449	0.000276211
Endoplasmin OS=Mus musculus OX=10090 GN=Hsp90b1 PE=1 SV=2	sp|P08113|ENPL_MOUSE	92	5	3	6	3	6	6	9	20	0.0543478	0.0326087	0.0652174	0.0326087	0.0652174	0.0652174	0.0978261	0.217391	0.000197186	8.39842e-05	0.000156972	8.89674e-05	0.000177628	0.000144716	0.000198958	0.00043233
Aspartate aminotransferase, cytoplasmic OS=Mus musculus OX=10090 GN=Got1 PE=1 SV=3	sp|P05201|AATC_MOUSE	46	3	6	9	7	9	8	11	10	0.0652174	0.130435	0.195652	0.152174	0.195652	0.173913	0.23913	0.217391	0.000236623	0.000335937	0.000470917	0.000415181	0.000532883	0.00038591	0.000486343	0.00043233
Glutathione S-transferase P 1 OS=Mus musculus OX=10090 GN=Gstp1 PE=1 SV=2	sp|P19157|GSTP1_MOUSE	24	7	5	6	4	9	6	11	7	0.291667	0.208333	0.25	0.166667	0.375	0.25	0.458333	0.291667	0.00105823	0.000536565	0.000601728	0.000454722	0.00102136	0.000554746	0.000932157	0.000580042
Ig kappa chain V-III region PC 3741/TEPC 111 OS=Mus musculus OX=10090 PE=1 SV=1	sp|P01660|KV3A8_MOUSE	12	3	6	8	10	0	0	5	4	0.25	0.5	0.666667	0.833333	0	0	0.416667	0.333333	0.000907056	0.00128776	0.00160461	0.00227361	0	0	0.000847415	0.000662906
D-beta-hydroxybutyrate dehydrogenase, mitochondrial OS=Mus musculus OX=10090 GN=Bdh1 PE=1 SV=2	sp|Q80XN0|BDH_MOUSE	38	9	4	3	5	10	5	9	7	0.236842	0.105263	0.0789474	0.131579	0.263158	0.131579	0.236842	0.184211	0.000859316	0.000271107	0.000190019	0.000358991	0.000716743	0.000291972	0.000481689	0.000366343
Cytochrome b-c1 complex subunit 7 OS=Mus musculus OX=10090 GN=Uqcrb PE=1 SV=3	sp|Q9D855|QCR7_MOUSE	14	4	5	8	4	5	9	12	10	0.285714	0.357143	0.571429	0.285714	0.357143	0.642857	0.857143	0.714286	0.00103664	0.000919826	0.00137538	0.000779524	0.000972723	0.00142649	0.00174325	0.00142051
Protein SET OS=Mus musculus OX=10090 GN=Set PE=1 SV=1	sp|Q9EQU5|SET_MOUSE	33	5	5	4	5	5	5	4	8	0.151515	0.151515	0.121212	0.151515	0.151515	0.151515	0.121212	0.242424	0.000549731	0.000390229	0.000291747	0.000413384	0.00041267	0.00033621	0.000246521	0.000482113
Heterogeneous nuclear ribonucleoprotein K OS=Mus musculus OX=10090 GN=Hnrnpk PE=1 SV=1	sp|P61979|HNRPK_MOUSE	51	2	7	5	5	6	5	6	19	0.0392157	0.137255	0.0980392	0.0980392	0.117647	0.0980392	0.117647	0.372549	0.000142283	0.000353502	0.000235972	0.000267484	0.000320426	0.000217548	0.00023927	0.000740895
ATP-dependent 6-phosphofructokinase, platelet type OS=Mus musculus OX=10090 GN=Pfkp PE=1 SV=1	sp|Q9WUA3|PFKAP_MOUSE	85	0	0	0	0	4	0	5	4	0	0	0	0	0.0470588	0	0.0588235	0.0470588	0	0	0	0	0.000128171	0	0.000119635	9.35867e-05
Thioredoxin OS=Mus musculus OX=10090 GN=Txn PE=1 SV=3	sp|P10639|THIO_MOUSE	12	3	4	5	2	7	5	4	3	0.25	0.333333	0.416667	0.166667	0.583333	0.416667	0.333333	0.25	0.000907056	0.000858505	0.00100288	0.000454722	0.00158878	0.000924577	0.000677932	0.000497179
Nucleolin OS=Mus musculus OX=10090 GN=Ncl PE=1 SV=2	sp|P09405|NUCL_MOUSE	77	2	3	9	4	8	0	8	8	0.025974	0.038961	0.116883	0.0519481	0.103896	0	0.103896	0.103896	9.42396e-05	0.000100345	0.000281327	0.000141732	0.000282974	0	0.000211304	0.00020662
NADH dehydrogenase [ubiquinone] 1 subunit C2 OS=Mus musculus OX=10090 GN=Ndufc2 PE=1 SV=1	sp|Q9CQ54|NDUC2_MOUSE	14	5	6	5	4	7	8	11	9	0.357143	0.428571	0.357143	0.285714	0.5	0.571429	0.785714	0.642857	0.00129579	0.00110379	0.000859611	0.000779524	0.00136181	0.00126799	0.00159798	0.00127846
Pyruvate carboxylase, mitochondrial OS=Mus musculus OX=10090 GN=Pc PE=1 SV=1	sp|Q05920|PYC_MOUSE	130	0	4	5	0	2	6	7	8	0	0.0307692	0.0384615	0	0.0153846	0.0461538	0.0538462	0.0615385	0	7.92466e-05	9.25735e-05	0	4.19019e-05	0.000102415	0.000109512	0.000122383
Succinate--CoA ligase [GDP-forming] subunit beta, mitochondrial OS=Mus musculus OX=10090 GN=Suclg2 PE=1 SV=3	sp|Q9Z2I8|SUCB2_MOUSE	47	3	4	4	7	9	11	11	10	0.0638298	0.0851064	0.0851064	0.148936	0.191489	0.234043	0.234043	0.212766	0.000231589	0.000219193	0.000204843	0.000406348	0.000521545	0.000519337	0.000475995	0.000423131
26S proteasome non-ATPase regulatory subunit 2 OS=Mus musculus OX=10090 GN=Psmd2 PE=1 SV=1	sp|Q8VDM4|PSMD2_MOUSE	100	2	4	10	4	6	7	14	12	0.02	0.04	0.1	0.04	0.06	0.07	0.14	0.12	7.25645e-05	0.000103021	0.000240691	0.000109133	0.000163417	0.000155329	0.000284732	0.000238646
Myosin regulatory light polypeptide 9 OS=Mus musculus OX=10090 GN=Myl9 PE=1 SV=3	sp|Q9CQ19|MYL9_MOUSE	20	0	9	0	0	0	8	0	0	0	0.45	0	0	0	0.4	0	0	0	0.00115898	0	0	0	0.000887594	0	0
ATP-binding cassette sub-family E member 1 OS=Mus musculus OX=10090 GN=Abce1 PE=1 SV=1	sp|P61222|ABCE1_MOUSE	67	0	3	0	0	2	0	2	0	0	0.0447761	0	0	0.0298507	0	0.0298507	0	0	0.000115322	0	0	8.13022e-05	0	6.07104e-05	0
Prohibitin-2 OS=Mus musculus OX=10090 GN=Phb2 PE=1 SV=1	sp|O35129|PHB2_MOUSE	33	6	10	5	7	10	6	9	7	0.181818	0.30303	0.151515	0.212121	0.30303	0.181818	0.272727	0.212121	0.000659677	0.000780459	0.000364683	0.000578737	0.00082534	0.000403452	0.000554672	0.000421849
Heat shock protein 75 kDa, mitochondrial OS=Mus musculus OX=10090 GN=Trap1 PE=1 SV=1	sp|Q9CQN1|TRAP1_MOUSE	80	0	5	7	6	7	8	8	10	0	0.0625	0.0875	0.075	0.0875	0.1	0.1	0.125	0	0.00016097	0.000210605	0.000204625	0.000238317	0.000221899	0.00020338	0.00024859
Cofilin-1 OS=Mus musculus OX=10090 GN=Cfl1 PE=1 SV=3	sp|P18760|COF1_MOUSE	19	5	5	7	2	7	5	11	14	0.263158	0.263158	0.368421	0.105263	0.368421	0.263158	0.578947	0.736842	0.000954796	0.000677767	0.000886757	0.000287193	0.00100344	0.000583943	0.00117746	0.00146537
40S ribosomal protein S23 OS=Mus musculus OX=10090 GN=Rps23 PE=1 SV=3	sp|P62267|RS23_MOUSE	16	3	10	5	6	6	8	8	11	0.1875	0.625	0.3125	0.375	0.375	0.5	0.5	0.6875	0.000680292	0.0016097	0.00075216	0.00102313	0.00102136	0.00110949	0.0010169	0.00136724
Kinectin OS=Mus musculus OX=10090 GN=Ktn1 PE=1 SV=1	sp|Q61595|KTN1_MOUSE	153	3	9	6	6	7	4	8	6	0.0196078	0.0588235	0.0392157	0.0392157	0.0457516	0.0261438	0.0522876	0.0392157	7.11417e-05	0.000151501	9.43887e-05	0.000106993	0.00012461	5.80127e-05	0.000106342	7.79889e-05
Estradiol 17-beta-dehydrogenase 8 OS=Mus musculus OX=10090 GN=Hsd17b8 PE=1 SV=2	sp|P50171|DHB8_MOUSE	27	7	6	7	7	9	7	6	7	0.259259	0.222222	0.259259	0.259259	0.333333	0.259259	0.222222	0.259259	0.000940651	0.000572336	0.000624014	0.000707346	0.000907874	0.000575292	0.000451955	0.000515593
5-oxoprolinase OS=Mus musculus OX=10090 GN=Oplah PE=1 SV=1	sp|Q8K010|OPLA_MOUSE	138	0	4	6	6	4	8	8	8	0	0.0289855	0.0434783	0.0434783	0.0289855	0.057971	0.057971	0.057971	0	7.46526e-05	0.000104648	0.000118623	7.89456e-05	0.000128637	0.000117901	0.000115288
E3 ubiquitin-protein ligase TRIM21 OS=Mus musculus OX=10090 GN=Trim21 PE=1 SV=1	sp|Q62191|RO52_MOUSE	54	2	8	6	3	3	7	5	4	0.037037	0.148148	0.111111	0.0555556	0.0555556	0.12963	0.0925926	0.0740741	0.000134379	0.000381558	0.000267435	0.000151574	0.000151312	0.000287646	0.000188315	0.000147312
Aflatoxin B1 aldehyde reductase member 2 OS=Mus musculus OX=10090 GN=Akr7a2 PE=1 SV=3	sp|Q8CG76|ARK72_MOUSE	41	7	7	6	5	9	9	10	6	0.170732	0.170732	0.146341	0.121951	0.219512	0.219512	0.243902	0.146341	0.000619453	0.000439722	0.000352231	0.000332724	0.000597869	0.000487094	0.000496048	0.000291032
Methylmalonate-semialdehyde dehydrogenase [acylating], mitochondrial OS=Mus musculus OX=10090 GN=Aldh6a1 PE=1 SV=1	sp|Q9EQ20|MMSA_MOUSE	58	8	5	8	6	7	5	4	4	0.137931	0.0862069	0.137931	0.103448	0.12069	0.0862069	0.0689655	0.0689655	0.000500445	0.000222027	0.000331988	0.000282241	0.000328713	0.000191292	0.000140262	0.000137153
Ig kappa chain V-III region PC 2880/PC 1229 OS=Mus musculus OX=10090 PE=1 SV=1	sp|P01654|KV3A1_MOUSE (+1)	12	3	4	8	3	0	0	9	3	0.25	0.333333	0.666667	0.25	0	0	0.75	0.25	0.000907056	0.000858505	0.00160461	0.000682083	0	0	0.00152535	0.000497179
Microtubule-associated protein 4 OS=Mus musculus OX=10090 GN=Map4 PE=1 SV=3	sp|P27546|MAP4_MOUSE	117	0	0	6	2	8	7	13	11	0	0	0.0512821	0.017094	0.0683761	0.0598291	0.111111	0.0940171	0	0	0.000123431	4.66382e-05	0.000186231	0.00013276	0.000225977	0.000186973
Delta(3,5)-Delta(2,4)-dienoyl-CoA isomerase, mitochondrial OS=Mus musculus OX=10090 GN=Ech1 PE=1 SV=1	sp|O35459|ECH1_MOUSE	36	0	7	7	6	7	7	9	8	0	0.194444	0.194444	0.166667	0.194444	0.194444	0.25	0.222222	0	0.000500794	0.00046801	0.000454722	0.000529593	0.000431469	0.000508449	0.000441937
Glutathione peroxidase 3 OS=Mus musculus OX=10090 GN=Gpx3 PE=1 SV=2	sp|P46412|GPX3_MOUSE	25	8	7	6	4	6	6	6	5	0.32	0.28	0.24	0.16	0.24	0.24	0.24	0.2	0.00116103	0.000721144	0.000577659	0.000436533	0.00065367	0.000532556	0.000488111	0.000397743
ADP-ribose glycohydrolase MACROD1 OS=Mus musculus OX=10090 GN=Macrod1 PE=1 SV=2	sp|Q922B1|MACD1_MOUSE	35	4	5	6	5	7	5	5	7	0.114286	0.142857	0.171429	0.142857	0.2	0.142857	0.142857	0.2	0.000414654	0.000367931	0.000412613	0.000389762	0.000544725	0.000316998	0.000290542	0.000397743
60S ribosomal protein L3 OS=Mus musculus OX=10090 GN=Rpl3 PE=1 SV=3	sp|P27659|RL3_MOUSE	46	0	2	7	6	4	4	8	14	0	0.0434783	0.152174	0.130435	0.0869565	0.0869565	0.173913	0.304348	0	0.000111979	0.000366269	0.00035587	0.000236837	0.000192955	0.000353704	0.000605262
Puromycin-sensitive aminopeptidase OS=Mus musculus OX=10090 GN=Npepps PE=1 SV=2	sp|Q11011|PSA_MOUSE	103	6	6	8	7	7	5	9	7	0.0582524	0.0582524	0.0776699	0.0679612	0.0679612	0.0485437	0.0873786	0.0679612	0.000211353	0.00015003	0.000186945	0.000185421	0.000185101	0.000107718	0.00017771	0.000135156
Filamin-B OS=Mus musculus OX=10090 GN=Flnb PE=1 SV=3	sp|Q80X90|FLNB_MOUSE	278	2	0	0	0	0	0	0	0	0.00719424	0	0	0	0	0	0	0	2.61023e-05	0	0	0	0	0	0	0
Dynactin subunit 1 OS=Mus musculus OX=10090 GN=Dctn1 PE=1 SV=3	sp|O08788|DCTN1_MOUSE	142	3	6	6	7	5	6	5	9	0.0211268	0.0422535	0.0422535	0.0492958	0.0352113	0.0422535	0.0352113	0.0633803	7.66526e-05	0.000108825	0.0001017	0.000134495	9.59022e-05	9.37599e-05	7.16126e-05	0.000126045
60S ribosomal protein L18a OS=Mus musculus OX=10090 GN=Rpl18a PE=1 SV=1	sp|P62717|RL18A_MOUSE	21	3	7	4	5	6	7	8	6	0.142857	0.333333	0.190476	0.238095	0.285714	0.333333	0.380952	0.285714	0.000518318	0.000858505	0.000458459	0.000649603	0.000778178	0.000739662	0.00077478	0.000568205
60S acidic ribosomal protein P0 OS=Mus musculus OX=10090 GN=Rplp0 PE=1 SV=3	sp|P14869|RLA0_MOUSE	34	3	5	3	0	3	5	8	9	0.0882353	0.147059	0.0882353	0	0.0882353	0.147059	0.235294	0.264706	0.000320138	0.000378752	0.000212374	0	0.00024032	0.000326321	0.00047854	0.000526425
Talin-1 OS=Mus musculus OX=10090 GN=Tln1 PE=1 SV=2	sp|P26039|TLN1_MOUSE	270	0	0	0	5	0	0	2	0	0	0	0	0.0185185	0	0	0.00740741	0	0	0	0	5.05247e-05	0	0	1.50652e-05	0
Succinyl-CoA:3-ketoacid coenzyme A transferase 1, mitochondrial OS=Mus musculus OX=10090 GN=Oxct1 PE=1 SV=1	sp|Q9D0K2|SCOT1_MOUSE	56	2	9	4	4	4	7	9	7	0.0357143	0.160714	0.0714286	0.0714286	0.0714286	0.125	0.160714	0.125	0.000129579	0.000413922	0.000171922	0.000194881	0.000194545	0.000277373	0.00032686	0.00024859
NADH dehydrogenase [ubiquinone] 1 beta subcomplex subunit 10 OS=Mus musculus OX=10090 GN=Ndufb10 PE=1 SV=3	sp|Q9DCS9|NDUBA_MOUSE	21	0	3	0	0	6	6	11	15	0	0.142857	0	0	0.285714	0.285714	0.52381	0.714286	0	0.000367931	0	0	0.000778178	0.000633996	0.00106532	0.00142051
Decorin OS=Mus musculus OX=10090 GN=Dcn PE=1 SV=1	sp|P28654|PGS2_MOUSE	40	2	7	5	3	8	6	7	6	0.05	0.175	0.125	0.075	0.2	0.15	0.175	0.15	0.000181411	0.000450715	0.000300864	0.000204625	0.000544725	0.000332848	0.000355914	0.000298308
[Protein ADP-ribosylarginine] hydrolase-like protein 1 OS=Mus musculus OX=10090 GN=Adprhl1 PE=1 SV=1	sp|Q8BGK2|ARHL1_MOUSE	40	4	5	7	6	6	7	8	8	0.1	0.125	0.175	0.15	0.15	0.175	0.2	0.2	0.000362823	0.000321939	0.000421209	0.00040925	0.000408544	0.000388322	0.000406759	0.000397743
40S ribosomal protein S14 OS=Mus musculus OX=10090 GN=Rps14 PE=1 SV=3	sp|P62264|RS14_MOUSE	16	4	7	7	6	5	8	7	11	0.25	0.4375	0.4375	0.375	0.3125	0.5	0.4375	0.6875	0.000907056	0.00112679	0.00105302	0.00102313	0.000851132	0.00110949	0.000889786	0.00136724
Murinoglobulin-1 OS=Mus musculus OX=10090 GN=Mug1 PE=1 SV=3	sp|P28665|MUG1_MOUSE	165	0	0	4	5	3	7	9	12	0	0	0.0242424	0.030303	0.0181818	0.0424242	0.0545455	0.0727273	0	0	5.83494e-05	8.26768e-05	4.95204e-05	9.41388e-05	0.000110934	0.000144634
60S ribosomal protein L23 OS=Mus musculus OX=10090 GN=Rpl23 PE=1 SV=1	sp|P62830|RL23_MOUSE	15	4	8	7	5	4	10	6	7	0.266667	0.533333	0.466667	0.333333	0.266667	0.666667	0.4	0.466667	0.000967527	0.00137361	0.00112323	0.000909444	0.0007263	0.00147932	0.000813519	0.000928068
Ig heavy chain V region 3 OS=Mus musculus OX=10090 GN=Ighv1-61 PE=1 SV=1	sp|P01749|HVM05_MOUSE	13	0	3	0	0	0	0	0	0	0	0.230769	0	0	0	0	0	0	0	0.000594349	0	0	0	0	0	0
Elongin-C OS=Mus musculus OX=10090 GN=Eloc PE=1 SV=1	sp|P83940|ELOC_MOUSE	12	4	6	7	5	5	9	8	4	0.333333	0.5	0.583333	0.416667	0.416667	0.75	0.666667	0.333333	0.00120941	0.00128776	0.00140403	0.00113681	0.00113484	0.00166424	0.00135586	0.000662906
Phosphoglycerate kinase 1 OS=Mus musculus OX=10090 GN=Pgk1 PE=1 SV=4	sp|P09411|PGK1_MOUSE	45	12	0	0	0	0	5	3	24	0.266667	0	0	0	0	0.111111	0.0666667	0.533333	0.000967527	0	0	0	0	0.000246554	0.000135586	0.00106065
Barrier-to-autointegration factor OS=Mus musculus OX=10090 GN=Banf1 PE=1 SV=1	sp|O54962|BAF_MOUSE	10	5	8	4	5	9	6	3	5	0.5	0.8	0.4	0.5	0.9	0.6	0.3	0.5	0.00181411	0.00206041	0.000962764	0.00136417	0.00245126	0.00133139	0.000610139	0.000994358
ATP synthase protein 8 OS=Mus musculus OX=10090 GN=Mtatp8 PE=1 SV=1	sp|P03930|ATP8_MOUSE	8	5	5	4	4	4	4	8	4	0.625	0.625	0.5	0.5	0.5	0.5	1	0.5	0.00226764	0.0016097	0.00120346	0.00136417	0.00136181	0.00110949	0.0020338	0.000994358
Heterogeneous nuclear ribonucleoprotein M OS=Mus musculus OX=10090 GN=Hnrnpm PE=1 SV=3	sp|Q9D0E1|HNRPM_MOUSE	78	0	6	6	5	11	4	6	9	0	0.0769231	0.0769231	0.0641026	0.141026	0.0512821	0.0769231	0.115385	0	0.000198116	0.000185147	0.000174893	0.000384101	0.000113794	0.000156446	0.000229467
Gelsolin OS=Mus musculus OX=10090 GN=Gsn PE=1 SV=3	sp|P13020|GELS_MOUSE	86	5	10	2	6	8	0	0	8	0.0581395	0.116279	0.0232558	0.0697674	0.0930233	0	0	0.0930233	0.000210943	0.000299478	5.59747e-05	0.000190349	0.00025336	0	0	0.000184997
Electron transfer flavoprotein-ubiquinone oxidoreductase, mitochondrial OS=Mus musculus OX=10090 GN=Etfdh PE=1 SV=1	sp|Q921G7|ETFD_MOUSE	68	0	7	7	0	5	7	11	9	0	0.102941	0.102941	0	0.0735294	0.102941	0.161765	0.132353	0	0.000265126	0.00024777	0	0.000200266	0.000228425	0.000328997	0.000263213
40S ribosomal protein S9 OS=Mus musculus OX=10090 GN=Rps9 PE=1 SV=3	sp|Q6ZWN5|RS9_MOUSE	23	0	4	9	3	5	5	13	9	0	0.173913	0.391304	0.130435	0.217391	0.217391	0.565217	0.391304	0	0.000447915	0.000941835	0.00035587	0.000592092	0.000482388	0.00114954	0.000778194
Insulin-degrading enzyme OS=Mus musculus OX=10090 GN=Ide PE=1 SV=1	sp|Q9JHR7|IDE_MOUSE	118	12	10	9	3	0	4	4	0	0.101695	0.0847458	0.0762712	0.0254237	0	0.0338983	0.0338983	0	0.000368972	0.000218264	0.000183578	6.93644e-05	0	7.52198e-05	6.89423e-05	0
Peroxiredoxin-4 OS=Mus musculus OX=10090 GN=Prdx4 PE=1 SV=1	sp|O08807|PRDX4_MOUSE	31	0	0	3	3	3	0	3	0	0	0	0.0967742	0.0967742	0.0967742	0	0.0967742	0	0	0	0.000232927	0.000264032	0.000263576	0	0.000196819	0
DnaJ homolog subfamily A member 2 OS=Mus musculus OX=10090 GN=Dnaja2 PE=1 SV=1	sp|Q9QYJ0|DNJA2_MOUSE	46	6	6	5	6	6	3	3	8	0.130435	0.130435	0.108696	0.130435	0.130435	0.0652174	0.0652174	0.173913	0.000473247	0.000335937	0.000261621	0.00035587	0.000355255	0.000144716	0.000132639	0.000345864
Isocitrate dehydrogenase [NADP] cytoplasmic OS=Mus musculus OX=10090 GN=Idh1 PE=1 SV=2	sp|O88844|IDHC_MOUSE	47	4	0	0	4	7	4	4	3	0.0851064	0	0	0.0851064	0.148936	0.0851064	0.0851064	0.0638298	0.000308785	0	0	0.000232199	0.000405646	0.00018885	0.000173089	0.000126939
Cytochrome b-c1 complex subunit 6, mitochondrial OS=Mus musculus OX=10090 GN=Uqcrh PE=1 SV=2	sp|P99028|QCR6_MOUSE	10	3	4	5	5	5	9	9	5	0.3	0.4	0.5	0.5	0.5	0.9	0.9	0.5	0.00108847	0.00103021	0.00120346	0.00136417	0.00136181	0.00199709	0.00183042	0.000994358
EH domain-containing protein 2 OS=Mus musculus OX=10090 GN=Ehd2 PE=1 SV=1	sp|Q8BH64|EHD2_MOUSE	61	4	9	6	0	6	5	12	8	0.0655738	0.147541	0.0983607	0	0.0983607	0.0819672	0.196721	0.131148	0.000237916	0.000379994	0.000236745	0	0.000267897	0.000181884	0.000400091	0.000260815
HIV Tat-specific factor 1 homolog OS=Mus musculus OX=10090 GN=Htatsf1 PE=1 SV=1	sp|Q8BGC0|HTSF1_MOUSE	86	0	0	0	2	0	0	0	0	0	0	0	0.0232558	0	0	0	0	0	0	0	6.34496e-05	0	0	0	0
Ig heavy chain V region 345 OS=Mus musculus OX=10090 PE=1 SV=1	sp|P18526|HVM55_MOUSE	13	0	4	5	4	4	3	5	0	0	0.307692	0.384615	0.307692	0.307692	0.230769	0.384615	0	0	0.000792466	0.000925735	0.000839487	0.000838038	0.000512074	0.00078223	0
Histone-lysine N-methyltransferase Smyd1 OS=Mus musculus OX=10090 GN=Smyd1 PE=1 SV=3	sp|P97443|SMYD1_MOUSE	56	0	0	0	0	6	9	16	8	0	0	0	0	0.107143	0.160714	0.285714	0.142857	0	0	0	0	0.000291817	0.000356623	0.000581085	0.000284102
Protein-L-isoaspartate O-methyltransferase domain-containing protein 1 OS=Mus musculus OX=10090 GN=Pcmtd1 PE=1 SV=1	sp|P59913|PCMD1_MOUSE	41	6	5	6	7	6	6	6	7	0.146341	0.121951	0.146341	0.170732	0.146341	0.146341	0.146341	0.170732	0.00053096	0.000314087	0.000352231	0.000465813	0.000398579	0.00032473	0.000297629	0.000339537
Transcriptional activator protein Pur-beta OS=Mus musculus OX=10090 GN=Purb PE=1 SV=3	sp|O35295|PURB_MOUSE	34	4	4	3	4	5	6	5	6	0.117647	0.117647	0.0882353	0.117647	0.147059	0.176471	0.147059	0.176471	0.00042685	0.000303002	0.000212374	0.00032098	0.000400533	0.000391586	0.000299088	0.00035095
2-oxoisovalerate dehydrogenase subunit alpha, mitochondrial OS=Mus musculus OX=10090 GN=Bckdha PE=1 SV=1	sp|P50136|ODBA_MOUSE	50	3	4	4	5	4	6	7	7	0.06	0.08	0.08	0.1	0.08	0.12	0.14	0.14	0.000217694	0.000206041	0.000192553	0.000272833	0.00021789	0.000266278	0.000284732	0.00027842
Cytochrome b-c1 complex subunit 9 OS=Mus musculus OX=10090 GN=Uqcr10 PE=1 SV=1	sp|Q8R1I1|QCR9_MOUSE	7	5	6	4	4	5	5	6	9	0.714286	0.857143	0.571429	0.571429	0.714286	0.714286	0.857143	1.28571	0.00259159	0.00220758	0.00137538	0.00155905	0.00194545	0.00158499	0.00174325	0.00255692
Sorting and assembly machinery component 50 homolog OS=Mus musculus OX=10090 GN=Samm50 PE=1 SV=1	sp|Q8BGH2|SAM50_MOUSE	52	5	4	4	3	7	7	7	8	0.0961538	0.0769231	0.0769231	0.0576923	0.134615	0.134615	0.134615	0.153846	0.000348868	0.000198116	0.000185147	0.000157404	0.000366642	0.00029871	0.00027378	0.000305956
UTP--glucose-1-phosphate uridylyltransferase OS=Mus musculus OX=10090 GN=Ugp2 PE=1 SV=3	sp|Q91ZJ5|UGPA_MOUSE	57	6	0	6	4	10	4	5	6	0.105263	0	0.105263	0.0701754	0.175439	0.0701754	0.0877193	0.105263	0.000381918	0	0.000253359	0.000191462	0.000477829	0.000155718	0.000178403	0.000209339
Microsomal glutathione S-transferase 3 OS=Mus musculus OX=10090 GN=Mgst3 PE=1 SV=1	sp|Q9CPU4|MGST3_MOUSE	17	2	3	5	2	4	5	6	7	0.117647	0.176471	0.294118	0.117647	0.235294	0.294118	0.352941	0.411765	0.00042685	0.000454502	0.000707915	0.00032098	0.000640853	0.000652643	0.000717811	0.000818883
Sorbin and SH3 domain-containing protein 2 OS=Mus musculus OX=10090 GN=Sorbs2 PE=1 SV=2	sp|Q3UTJ2|SRBS2_MOUSE	132	0	7	4	4	8	5	3	3	0	0.0530303	0.030303	0.030303	0.0606061	0.0378788	0.0227273	0.0227273	0	0.00013658	7.29367e-05	8.26768e-05	0.000165068	8.40525e-05	4.62227e-05	4.51981e-05
Aldehyde dehydrogenase, mitochondrial OS=Mus musculus OX=10090 GN=Aldh2 PE=1 SV=1	sp|P47738|ALDH2_MOUSE	57	5	4	6	4	6	6	11	6	0.0877193	0.0701754	0.105263	0.0701754	0.105263	0.105263	0.192982	0.105263	0.000318265	0.000180738	0.000253359	0.000191462	0.000286697	0.000233577	0.000392487	0.000209339
Unconventional myosin-Ic OS=Mus musculus OX=10090 GN=Myo1c PE=1 SV=2	sp|Q9WTI7|MYO1C_MOUSE	122	4	12	3	2	15	0	0	9	0.0327869	0.0983607	0.0245902	0.0163934	0.122951	0	0	0.0737705	0.000118958	0.000253329	5.91863e-05	4.47268e-05	0.000334872	0	0	0.000146709
Nesprin-1 OS=Mus musculus OX=10090 GN=Syne1 PE=1 SV=2	sp|Q6ZWR6|SYNE1_MOUSE	1010	0	2	3	0	0	0	0	0	0	0.0019802	0.0029703	0	0	0	0	0	0	5.10003e-06	7.14924e-06	0	0	0	0	0
Vigilin OS=Mus musculus OX=10090 GN=Hdlbp PE=1 SV=1	sp|Q8VDJ3|VIGLN_MOUSE	142	0	0	2	0	0	3	4	4	0	0	0.0140845	0	0	0.0211268	0.028169	0.028169	0	0	3.39002e-05	0	0	4.688e-05	5.72901e-05	5.60202e-05
Short/branched chain specific acyl-CoA dehydrogenase, mitochondrial OS=Mus musculus OX=10090 GN=Acadsb PE=1 SV=1	sp|Q9DBL1|ACDSB_MOUSE	48	5	5	3	4	5	7	7	9	0.104167	0.104167	0.0625	0.0833333	0.104167	0.145833	0.145833	0.1875	0.00037794	0.000268283	0.000150432	0.000227361	0.000283711	0.000323602	0.000296595	0.000372884
Heat shock protein beta-6 OS=Mus musculus OX=10090 GN=Hspb6 PE=1 SV=1	sp|Q5EBG6|HSPB6_MOUSE	18	5	5	6	5	8	7	5	8	0.277778	0.277778	0.333333	0.277778	0.444444	0.388889	0.277778	0.444444	0.00100784	0.000715421	0.000802304	0.00075787	0.0012105	0.000862939	0.000564944	0.000883874
Palladin OS=Mus musculus OX=10090 GN=Palld PE=1 SV=2	sp|Q9ET54|PALLD_MOUSE	152	0	0	7	4	5	3	6	6	0	0	0.0460526	0.0263158	0.0328947	0.0197368	0.0394737	0.0394737	0	0	0.000110845	7.17982e-05	8.95929e-05	4.37958e-05	8.02815e-05	7.8502e-05
ATP synthase membrane subunit DAPIT, mitochondrial OS=Mus musculus OX=10090 GN=Atp5md PE=1 SV=1	sp|Q78IK2|ATPMD_MOUSE	6	6	5	4	6	6	9	7	4	1	0.833333	0.666667	1	1	1.5	1.16667	0.666667	0.00362823	0.00214626	0.00160461	0.00272833	0.00272362	0.00332848	0.00237276	0.00132581
ATP-binding cassette sub-family F member 1 OS=Mus musculus OX=10090 GN=Abcf1 PE=1 SV=1	sp|Q6P542|ABCF1_MOUSE	95	0	0	3	3	0	2	2	2	0	0	0.0315789	0.0315789	0	0.0210526	0.0210526	0.0210526	0	0	7.60077e-05	8.61579e-05	0	4.67155e-05	4.28168e-05	4.18677e-05
Talin-2 OS=Mus musculus OX=10090 GN=Tln2 PE=1 SV=3	sp|Q71LX4|TLN2_MOUSE	254	0	2	0	0	0	0	0	3	0	0.00787402	0	0	0	0	0	0.011811	0	2.02796e-05	0	0	0	0	0	2.34888e-05
Bifunctional epoxide hydrolase 2 OS=Mus musculus OX=10090 GN=Ephx2 PE=1 SV=2	sp|P34914|HYES_MOUSE	63	4	6	7	4	6	5	6	3	0.0634921	0.0952381	0.111111	0.0634921	0.0952381	0.0793651	0.0952381	0.047619	0.000230364	0.000245287	0.000267435	0.000173228	0.000259393	0.00017611	0.000193695	9.47008e-05
Delta-1-pyrroline-5-carboxylate dehydrogenase, mitochondrial OS=Mus musculus OX=10090 GN=Aldh4a1 PE=1 SV=3	sp|Q8CHT0|AL4A1_MOUSE	62	0	8	7	3	9	4	3	3	0	0.129032	0.112903	0.0483871	0.145161	0.0645161	0.0483871	0.0483871	0	0.000332324	0.000271748	0.000132016	0.000395365	0.00014316	9.84095e-05	9.62282e-05
LIM and calponin homology domains-containing protein 1 OS=Mus musculus OX=10090 GN=Limch1 PE=1 SV=2	sp|Q3UH68|LIMC1_MOUSE	118	3	8	0	3	7	5	3	8	0.0254237	0.0677966	0	0.0254237	0.059322	0.0423729	0.0254237	0.0677966	9.2243e-05	0.000174611	0	6.93644e-05	0.000161571	9.40248e-05	5.17067e-05	0.000134828
Acyl-CoA dehydrogenase family member 10 OS=Mus musculus OX=10090 GN=Acad10 PE=1 SV=1	sp|Q8K370|ACD10_MOUSE	119	4	5	0	3	9	6	7	7	0.0336134	0.0420168	0	0.0252101	0.0756303	0.0504202	0.0588235	0.0588235	0.000121957	0.000108215	0	6.87815e-05	0.000205988	0.000111882	0.000119635	0.000116983
Enoyl-CoA delta isomerase 2 OS=Mus musculus OX=10090 GN=Eci2 PE=1 SV=2	sp|Q9WUR2|ECI2_MOUSE	43	3	2	0	4	5	6	8	7	0.0697674	0.0465116	0	0.0930233	0.116279	0.139535	0.186047	0.162791	0.000253132	0.000119791	0	0.000253798	0.0003167	0.000309626	0.000378381	0.000323745
Cysteine desulfurase, mitochondrial OS=Mus musculus OX=10090 GN=Nfs1 PE=1 SV=3	sp|Q9Z1J3|NFS1_MOUSE	51	0	0	6	8	7	7	5	10	0	0	0.117647	0.156863	0.137255	0.137255	0.0980392	0.196078	0	0	0.000283166	0.000427974	0.000373831	0.000304567	0.000199392	0.000389944
40S ribosomal protein S25 OS=Mus musculus OX=10090 GN=Rps25 PE=1 SV=1	sp|P62852|RS25_MOUSE	14	5	4	6	5	6	5	5	8	0.357143	0.285714	0.428571	0.357143	0.428571	0.357143	0.357143	0.571429	0.00129579	0.000735861	0.00103153	0.000974405	0.00116727	0.000792495	0.000726356	0.00113641
60S ribosomal protein L13 OS=Mus musculus OX=10090 GN=Rpl13 PE=1 SV=3	sp|P47963|RL13_MOUSE	24	2	2	5	4	4	3	5	5	0.0833333	0.0833333	0.208333	0.166667	0.166667	0.125	0.208333	0.208333	0.000302352	0.000214626	0.00050144	0.000454722	0.000453937	0.000277373	0.000423708	0.000414316
40S ribosomal protein S17 OS=Mus musculus OX=10090 GN=Rps17 PE=1 SV=2	sp|P63276|RS17_MOUSE	16	0	4	5	5	0	6	7	7	0	0.25	0.3125	0.3125	0	0.375	0.4375	0.4375	0	0.000643878	0.00075216	0.000852604	0	0.000832119	0.000889786	0.000870064
Succinate dehydrogenase cytochrome b560 subunit, mitochondrial OS=Mus musculus OX=10090 GN=Sdhc PE=1 SV=1	sp|Q9CZB0|C560_MOUSE	18	2	3	6	3	4	6	10	6	0.111111	0.166667	0.333333	0.166667	0.222222	0.333333	0.555556	0.333333	0.000403136	0.000429252	0.000802304	0.000454722	0.00060525	0.000739662	0.00112989	0.000662906
Protein FAM136A OS=Mus musculus OX=10090 GN=Fam136a PE=1 SV=1	sp|Q9CR98|F136A_MOUSE	16	2	6	5	5	3	7	8	4	0.125	0.375	0.3125	0.3125	0.1875	0.4375	0.5	0.25	0.000453528	0.000965818	0.00075216	0.000852604	0.000510679	0.000970806	0.0010169	0.000497179
GTP-binding nuclear protein Ran OS=Mus musculus OX=10090 GN=Ran PE=1 SV=3	sp|P62827|RAN_MOUSE	24	4	5	4	3	5	3	5	13	0.166667	0.208333	0.166667	0.125	0.208333	0.125	0.208333	0.541667	0.000604704	0.000536565	0.000401152	0.000341042	0.000567422	0.000277373	0.000423708	0.00107722
Citramalyl-CoA lyase, mitochondrial OS=Mus musculus OX=10090 GN=Clybl PE=1 SV=2	sp|Q8R4N0|CLYBL_MOUSE	38	5	4	4	4	4	5	7	5	0.131579	0.105263	0.105263	0.105263	0.105263	0.131579	0.184211	0.131579	0.000477398	0.000271107	0.000253359	0.000287193	0.000286697	0.000291972	0.000374647	0.000261673
Acyl carrier protein, mitochondrial OS=Mus musculus OX=10090 GN=Ndufab1 PE=1 SV=1	sp|Q9CR21|ACPM_MOUSE	17	4	4	5	3	5	6	4	4	0.235294	0.235294	0.294118	0.176471	0.294118	0.352941	0.235294	0.235294	0.0008537	0.000606003	0.000707915	0.000481471	0.000801066	0.000783171	0.00047854	0.000467933
Isobutyryl-CoA dehydrogenase, mitochondrial OS=Mus musculus OX=10090 GN=Acad8 PE=1 SV=2	sp|Q9D7B6|ACAD8_MOUSE	45	3	4	3	4	5	7	8	9	0.0666667	0.0888889	0.0666667	0.0888889	0.111111	0.155556	0.177778	0.2	0.000241882	0.000228935	0.000160461	0.000242519	0.000302625	0.000345175	0.000361564	0.000397743
Ig kappa chain V-V region MOPC 41 OS=Mus musculus OX=10090 GN=Gm5571 PE=1 SV=1	sp|P01639|KV5A7_MOUSE	14	2	4	3	6	0	4	3	5	0.142857	0.285714	0.214286	0.428571	0	0.285714	0.214286	0.357143	0.000518318	0.000735861	0.000515767	0.00116929	0	0.000633996	0.000435814	0.000710256
Ig kappa chain V-V region L7 (Fragment) OS=Mus musculus OX=10090 GN=Gm10881 PE=1 SV=1	sp|P01642|KV5A9_MOUSE	13	3	2	4	6	3	2	4	0	0.230769	0.153846	0.307692	0.461538	0.230769	0.153846	0.307692	0	0.000837283	0.000396233	0.000740588	0.00125923	0.000628528	0.000341382	0.000625784	0
Mitochondrial import inner membrane translocase subunit TIM50 OS=Mus musculus OX=10090 GN=Timm50 PE=1 SV=1	sp|Q9D880|TIM50_MOUSE	40	3	0	0	2	3	3	4	4	0.075	0	0	0.05	0.075	0.075	0.1	0.1	0.000272117	0	0	0.000136417	0.000204272	0.000166424	0.00020338	0.000198872
Laminin subunit beta-1 OS=Mus musculus OX=10090 GN=Lamb1 PE=1 SV=3	sp|P02469|LAMB1_MOUSE	197	0	0	0	0	4	0	0	0	0	0	0	0	0.0203046	0	0	0	0	0	0	0	5.5302e-05	0	0	0
Serpin B6 OS=Mus musculus OX=10090 GN=Serpinb6 PE=1 SV=1	sp|Q60854|SPB6_MOUSE	43	3	3	5	4	5	4	6	6	0.0697674	0.0697674	0.116279	0.0930233	0.116279	0.0930233	0.139535	0.139535	0.000253132	0.000179687	0.000279873	0.000253798	0.0003167	0.000206417	0.000283786	0.000277495
Glutaryl-CoA dehydrogenase, mitochondrial OS=Mus musculus OX=10090 GN=Gcdh PE=1 SV=2	sp|Q60759|GCDH_MOUSE	49	2	0	3	2	3	3	4	3	0.0408163	0	0.0612245	0.0408163	0.0612245	0.0612245	0.0816327	0.0612245	0.000148091	0	0.000147362	0.000111361	0.000166752	0.000135856	0.000166024	0.000121758
39S ribosomal protein L12, mitochondrial OS=Mus musculus OX=10090 GN=Mrpl12 PE=1 SV=2	sp|Q9DB15|RM12_MOUSE	22	4	3	4	2	6	6	7	4	0.181818	0.136364	0.181818	0.0909091	0.272727	0.272727	0.318182	0.181818	0.000659677	0.000351206	0.00043762	0.00024803	0.000742806	0.000605178	0.000647117	0.000361585
Aldo-keto reductase family 1 member B1 OS=Mus musculus OX=10090 GN=Akr1b1 PE=1 SV=3	sp|P45376|ALDR_MOUSE	36	3	5	4	0	6	5	9	7	0.0833333	0.138889	0.111111	0	0.166667	0.138889	0.25	0.194444	0.000302352	0.00035771	0.000267435	0	0.000453937	0.000308192	0.000508449	0.000386695
Ras-related protein Rab-1B OS=Mus musculus OX=10090 GN=Rab1b PE=1 SV=1	sp|Q9D1G1|RAB1B_MOUSE	22	0	0	0	0	4	6	7	6	0	0	0	0	0.181818	0.272727	0.318182	0.272727	0	0	0	0	0.000495204	0.000605178	0.000647117	0.000542377
ADP-ribosylation factor 5 OS=Mus musculus OX=10090 GN=Arf5 PE=1 SV=2	sp|P84084|ARF5_MOUSE	21	0	0	0	0	0	4	4	0	0	0	0	0	0	0.190476	0.190476	0	0	0	0	0	0	0.000422664	0.00038739	0
Monocarboxylate transporter 1 OS=Mus musculus OX=10090 GN=Slc16a1 PE=1 SV=1	sp|P53986|MOT1_MOUSE	53	0	2	2	2	4	6	9	7	0	0.0377358	0.0377358	0.0377358	0.0754717	0.113208	0.169811	0.132075	0	9.71892e-05	9.08268e-05	0.000102956	0.000205556	0.000251206	0.000345362	0.000262661
Glutathione S-transferase Mu 1 OS=Mus musculus OX=10090 GN=Gstm1 PE=1 SV=2	sp|P10649|GSTM1_MOUSE	26	2	4	5	4	2	4	8	5	0.0769231	0.153846	0.192308	0.153846	0.0769231	0.153846	0.307692	0.192308	0.000279094	0.000396233	0.000462867	0.000419744	0.000209509	0.000341382	0.000625784	0.000382446
High mobility group protein HMG-I/HMG-Y OS=Mus musculus OX=10090 GN=Hmga1 PE=1 SV=4	sp|P17095|HMGA1_MOUSE	12	5	3	5	3	5	4	3	4	0.416667	0.25	0.416667	0.25	0.416667	0.333333	0.25	0.333333	0.00151176	0.000643878	0.00100288	0.000682083	0.00113484	0.000739662	0.000508449	0.000662906
60S ribosomal protein L13a OS=Mus musculus OX=10090 GN=Rpl13a PE=1 SV=4	sp|P19253|RL13A_MOUSE	23	0	0	2	0	2	0	6	6	0	0	0.0869565	0	0.0869565	0	0.26087	0.26087	0	0	0.000209297	0	0.000236837	0	0.000530556	0.000518796
Coatomer subunit alpha OS=Mus musculus OX=10090 GN=Copa PE=1 SV=2	sp|Q8CIE6|COPA_MOUSE	138	0	2	4	4	3	6	5	7	0	0.0144928	0.0289855	0.0289855	0.0217391	0.0434783	0.0362319	0.0507246	0	3.73263e-05	6.97655e-05	7.90821e-05	5.92092e-05	9.64776e-05	7.36883e-05	0.000100877
Guanine nucleotide-binding protein G(I)/G(S)/G(T) subunit beta-2 OS=Mus musculus OX=10090 GN=Gnb2 PE=1 SV=3	sp|P62880|GBB2_MOUSE	37	3	3	4	4	4	6	7	10	0.0810811	0.0810811	0.108108	0.108108	0.108108	0.162162	0.189189	0.27027	0.00029418	0.000208825	0.000260207	0.000294955	0.000294446	0.000359835	0.000384772	0.000537491
Prostamide/prostaglandin F synthase OS=Mus musculus OX=10090 GN=Prxl2b PE=1 SV=1	sp|Q9DB60|PXL2B_MOUSE	22	3	4	3	0	6	6	7	4	0.136364	0.181818	0.136364	0	0.272727	0.272727	0.318182	0.181818	0.000494758	0.000468275	0.000328215	0	0.000742806	0.000605178	0.000647117	0.000361585
NADH dehydrogenase [ubiquinone] 1 beta subcomplex subunit 6 OS=Mus musculus OX=10090 GN=Ndufb6 PE=1 SV=3	sp|Q3UIU2|NDUB6_MOUSE	16	0	2	4	0	5	6	11	9	0	0.125	0.25	0	0.3125	0.375	0.6875	0.5625	0	0.000321939	0.000601728	0	0.000851132	0.000832119	0.00139824	0.00111865
Glutaredoxin-3 OS=Mus musculus OX=10090 GN=Glrx3 PE=1 SV=1	sp|Q9CQM9|GLRX3_MOUSE	38	3	5	5	6	5	5	6	4	0.0789474	0.131579	0.131579	0.157895	0.131579	0.131579	0.157895	0.105263	0.000286439	0.000338883	0.000316699	0.000430789	0.000358372	0.000291972	0.000321126	0.000209339
Platelet glycoprotein 4 OS=Mus musculus OX=10090 GN=Cd36 PE=1 SV=2	sp|Q08857|CD36_MOUSE	53	0	3	2	2	0	0	0	5	0	0.0566038	0.0377358	0.0377358	0	0	0	0.0943396	0	0.000145784	9.08268e-05	0.000102956	0	0	0	0.000187615
60S ribosomal protein L22 OS=Mus musculus OX=10090 GN=Rpl22 PE=1 SV=2	sp|P67984|RL22_MOUSE	15	3	5	3	0	3	5	4	5	0.2	0.333333	0.2	0	0.2	0.333333	0.266667	0.333333	0.000725645	0.000858505	0.000481382	0	0.000544725	0.000739662	0.000542346	0.000662906
Short-chain specific acyl-CoA dehydrogenase, mitochondrial OS=Mus musculus OX=10090 GN=Acads PE=1 SV=2	sp|Q07417|ACADS_MOUSE	45	3	4	5	4	5	6	8	7	0.0666667	0.0888889	0.111111	0.0888889	0.111111	0.133333	0.177778	0.155556	0.000241882	0.000228935	0.000267435	0.000242519	0.000302625	0.000295865	0.000361564	0.000309356
Acyl-coenzyme A thioesterase 2, mitochondrial OS=Mus musculus OX=10090 GN=Acot2 PE=1 SV=2	sp|Q9QYR9|ACOT2_MOUSE	50	0	0	4	0	6	6	9	6	0	0	0.08	0	0.12	0.12	0.18	0.12	0	0	0.000192553	0	0.000326835	0.000266278	0.000366083	0.000238646
Ras-related protein Rab-10 OS=Mus musculus OX=10090 GN=Rab10 PE=1 SV=1	sp|P61027|RAB10_MOUSE	23	0	3	3	2	5	4	7	4	0	0.130435	0.130435	0.0869565	0.217391	0.173913	0.304348	0.173913	0	0.000335937	0.000313945	0.000237246	0.000592092	0.00038591	0.000618982	0.000345864
Prohibitin OS=Mus musculus OX=10090 GN=Phb PE=1 SV=1	sp|P67778|PHB_MOUSE	30	4	6	4	5	5	3	4	3	0.133333	0.2	0.133333	0.166667	0.166667	0.1	0.133333	0.1	0.000483763	0.000515103	0.000320921	0.000454722	0.000453937	0.000221899	0.000271173	0.000198872
39S ribosomal protein L14, mitochondrial OS=Mus musculus OX=10090 GN=Mrpl14 PE=1 SV=1	sp|Q9D1I6|RM14_MOUSE	16	3	4	5	5	5	7	5	5	0.1875	0.25	0.3125	0.3125	0.3125	0.4375	0.3125	0.3125	0.000680292	0.000643878	0.00075216	0.000852604	0.000851132	0.000970806	0.000635562	0.000621474
Phosphoglycerate mutase 1 OS=Mus musculus OX=10090 GN=Pgam1 PE=1 SV=3	sp|Q9DBJ1|PGAM1_MOUSE	29	5	0	0	0	0	0	0	10	0.172414	0	0	0	0	0	0	0.344828	0.000625556	0	0	0	0	0	0	0.000685764
Lysozyme C-1 OS=Mus musculus OX=10090 GN=Lyz1 PE=1 SV=1	sp|P17897|LYZ1_MOUSE	17	0	4	5	4	2	2	0	2	0	0.235294	0.294118	0.235294	0.117647	0.117647	0	0.117647	0	0.000606003	0.000707915	0.000641961	0.000320426	0.000261057	0	0.000233967
Collagen alpha-2(I) chain OS=Mus musculus OX=10090 GN=Col1a2 PE=1 SV=2	sp|Q01149|CO1A2_MOUSE	130	0	0	0	0	4	0	2	6	0	0	0	0	0.0307692	0	0.0153846	0.0461538	0	0	0	0	8.38038e-05	0	3.12892e-05	9.17869e-05
Glutamine amidotransferase-like class 1 domain-containing protein 3A, mitochondrial OS=Mus musculus OX=10090 GN=Gatd3a PE=1 SV=1	sp|Q9D172|GAL3A_MOUSE	28	4	4	2	0	5	6	6	6	0.142857	0.142857	0.0714286	0	0.178571	0.214286	0.214286	0.214286	0.000518318	0.000367931	0.000171922	0	0.000486361	0.000475497	0.000435814	0.000426154
ATPase family AAA domain-containing protein 3 OS=Mus musculus OX=10090 GN=Atad3 PE=1 SV=1	sp|Q925I1|ATAD3_MOUSE	67	0	4	4	2	0	5	8	7	0	0.0597015	0.0597015	0.0298507	0	0.0746269	0.119403	0.104478	0	0.000153762	0.000143696	8.14428e-05	0	0.000165596	0.000242841	0.000207776
60S ribosomal protein L34 OS=Mus musculus OX=10090 GN=Rpl34 PE=1 SV=2	sp|Q9D1R9|RL34_MOUSE	13	5	6	5	3	3	5	7	3	0.384615	0.461538	0.384615	0.230769	0.230769	0.384615	0.538462	0.230769	0.00139547	0.0011887	0.000925735	0.000629615	0.000628528	0.000853456	0.00109512	0.000458935
NADH dehydrogenase [ubiquinone] 1 beta subcomplex subunit 5, mitochondrial OS=Mus musculus OX=10090 GN=Ndufb5 PE=1 SV=1	sp|Q9CQH3|NDUB5_MOUSE	22	4	3	4	0	4	6	7	5	0.181818	0.136364	0.181818	0	0.181818	0.272727	0.318182	0.227273	0.000659677	0.000351206	0.00043762	0	0.000495204	0.000605178	0.000647117	0.000451981
Eukaryotic initiation factor 4A-I OS=Mus musculus OX=10090 GN=Eif4a1 PE=1 SV=1	sp|P60843|IF4A1_MOUSE	46	2	0	0	3	0	5	5	11	0.0434783	0	0	0.0652174	0	0.108696	0.108696	0.23913	0.000157749	0	0	0.000177935	0	0.000241194	0.000221065	0.000475563
40S ribosomal protein S26 OS=Mus musculus OX=10090 GN=Rps26 PE=1 SV=3	sp|P62855|RS26_MOUSE	13	3	4	4	3	4	5	4	5	0.230769	0.307692	0.307692	0.230769	0.307692	0.384615	0.307692	0.384615	0.000837283	0.000792466	0.000740588	0.000629615	0.000838038	0.000853456	0.000625784	0.000764891
Polyadenylate-binding protein 2 OS=Mus musculus OX=10090 GN=Pabpn1 PE=1 SV=3	sp|Q8CCS6|PABP2_MOUSE	32	5	4	4	6	7	3	6	5	0.15625	0.125	0.125	0.1875	0.21875	0.09375	0.1875	0.15625	0.00056691	0.000321939	0.000300864	0.000511563	0.000595793	0.00020803	0.000381337	0.000310737
Lipoprotein lipase OS=Mus musculus OX=10090 GN=Lpl PE=1 SV=3	sp|P11152|LIPL_MOUSE	53	3	6	6	2	5	6	4	5	0.0566038	0.113208	0.113208	0.0377358	0.0943396	0.113208	0.0754717	0.0943396	0.000205371	0.000291568	0.00027248	0.000102956	0.000256946	0.000251206	0.000153494	0.000187615
Selenium-binding protein 2 OS=Mus musculus OX=10090 GN=Selenbp2 PE=1 SV=2	sp|Q63836|SBP2_MOUSE	53	7	4	3	3	5	3	6	7	0.132075	0.0754717	0.0566038	0.0566038	0.0943396	0.0566038	0.113208	0.132075	0.0004792	0.000194378	0.00013624	0.000154434	0.000256946	0.000125603	0.000230241	0.000262661
E3 ubiquitin-protein ligase RBX1 OS=Mus musculus OX=10090 GN=Rbx1 PE=1 SV=1	sp|P62878|RBX1_MOUSE	12	0	5	4	4	0	5	5	5	0	0.416667	0.333333	0.333333	0	0.416667	0.416667	0.416667	0	0.00107313	0.000802304	0.000909444	0	0.000924577	0.000847415	0.000828632
60S ribosomal protein L37a OS=Mus musculus OX=10090 GN=Rpl37a PE=1 SV=2	sp|P61514|RL37A_MOUSE	10	2	3	6	2	2	3	2	3	0.2	0.3	0.6	0.2	0.2	0.3	0.2	0.3	0.000725645	0.000772654	0.00144415	0.000545667	0.000544725	0.000665696	0.000406759	0.000596615
60S ribosomal protein L10a OS=Mus musculus OX=10090 GN=Rpl10a PE=1 SV=3	sp|P53026|RL10A_MOUSE	25	2	3	5	2	3	0	3	4	0.08	0.12	0.2	0.08	0.12	0	0.12	0.16	0.000290258	0.000309062	0.000481382	0.000218267	0.000326835	0	0.000244056	0.000318195
Caveolin-1 OS=Mus musculus OX=10090 GN=Cav1 PE=1 SV=1	sp|P49817|CAV1_MOUSE	21	2	3	3	0	3	6	5	4	0.0952381	0.142857	0.142857	0	0.142857	0.285714	0.238095	0.190476	0.000345545	0.000367931	0.000343844	0	0.000389089	0.000633996	0.000484237	0.000378803
Prostaglandin reductase-3 OS=Mus musculus OX=10090 GN=Zadh2 PE=1 SV=1	sp|Q8BGC4|PTGR3_MOUSE	41	3	4	0	0	5	7	6	9	0.0731707	0.097561	0	0	0.121951	0.170732	0.146341	0.219512	0.00026548	0.00025127	0	0	0.000332149	0.000378851	0.000297629	0.000436548
Obscurin OS=Mus musculus OX=10090 GN=Obscn PE=1 SV=3	sp|A2AAJ9|OBSCN_MOUSE	967	0	0	0	0	5	0	0	3	0	0	0	0	0.00517063	0	0	0.00310238	0	0	0	0	1.40829e-05	0	0	6.16975e-06
Ig lambda-1 chain V region S178 OS=Mus musculus OX=10090 PE=1 SV=1	sp|P01725|LV1C_MOUSE	12	0	2	4	3	0	2	3	5	0	0.166667	0.333333	0.25	0	0.166667	0.25	0.416667	0	0.000429252	0.000802304	0.000682083	0	0.000369831	0.000508449	0.000828632
Cardiac phospholamban OS=Mus musculus OX=10090 GN=Pln PE=1 SV=1	sp|P61014|PPLA_MOUSE	6	0	0	0	0	0	5	4	0	0	0	0	0	0	0.833333	0.666667	0	0	0	0	0	0	0.00184915	0.00135586	0
Branched-chain-amino-acid aminotransferase, mitochondrial OS=Mus musculus OX=10090 GN=Bcat2 PE=1 SV=2	sp|O35855|BCAT2_MOUSE	44	2	4	2	3	3	2	7	6	0.0454545	0.0909091	0.0454545	0.0681818	0.0681818	0.0454545	0.159091	0.136364	0.000164919	0.000234138	0.000109405	0.000186023	0.000185702	0.000100863	0.000323559	0.000271189
39S ribosomal protein L22, mitochondrial OS=Mus musculus OX=10090 GN=Mrpl22 PE=1 SV=1	sp|Q8BU88|RM22_MOUSE	24	2	4	3	0	4	5	6	5	0.0833333	0.166667	0.125	0	0.166667	0.208333	0.25	0.208333	0.000302352	0.000429252	0.000300864	0	0.000453937	0.000462289	0.000508449	0.000414316
Propionyl-CoA carboxylase beta chain, mitochondrial OS=Mus musculus OX=10090 GN=Pccb PE=1 SV=2	sp|Q99MN9|PCCB_MOUSE	58	0	3	3	0	5	2	6	5	0	0.0517241	0.0517241	0	0.0862069	0.0344828	0.103448	0.0862069	0	0.000133216	0.000124495	0	0.000234795	7.65167e-05	0.000210393	0.000171441
Methylmalonic aciduria type A homolog, mitochondrial OS=Mus musculus OX=10090 GN=Mmaa PE=1 SV=1	sp|Q8C7H1|MMAA_MOUSE	46	3	5	3	2	7	5	6	4	0.0652174	0.108696	0.0652174	0.0434783	0.152174	0.108696	0.130435	0.0869565	0.000236623	0.000279947	0.000156972	0.000118623	0.000414464	0.000241194	0.000265278	0.000172932
Cytochrome c oxidase subunit 7A1, mitochondrial OS=Mus musculus OX=10090 GN=Cox7a1 PE=1 SV=1	sp|P56392|CX7A1_MOUSE	9	5	5	5	6	6	4	0	4	0.555556	0.555556	0.555556	0.666667	0.666667	0.444444	0	0.444444	0.00201568	0.00143084	0.00133717	0.00181889	0.00181575	0.000986216	0	0.000883874
Protein phosphatase 1 regulatory subunit 12B OS=Mus musculus OX=10090 GN=Ppp1r12b PE=1 SV=2	sp|Q8BG95|MYPT2_MOUSE	109	0	0	0	0	0	0	0	2	0	0	0	0	0	0	0	0.0183486	0	0	0	0	0	0	0	3.64902e-05
Epiplakin OS=Mus musculus OX=10090 GN=Eppk1 PE=1 SV=2	sp|Q8R0W0|EPIPL_MOUSE	725	7	0	0	0	0	0	0	0	0.00965517	0	0	0	0	0	0	0	3.50311e-05	0	0	0	0	0	0	0
Receptor of activated protein C kinase 1 OS=Mus musculus OX=10090 GN=Rack1 PE=1 SV=3	sp|P68040|RACK1_MOUSE	35	3	4	0	2	6	5	3	9	0.0857143	0.114286	0	0.0571429	0.171429	0.142857	0.0857143	0.257143	0.000310991	0.000294344	0	0.000155905	0.000466907	0.000316998	0.000174325	0.000511384
60S ribosomal protein L14 OS=Mus musculus OX=10090 GN=Rpl14 PE=1 SV=3	sp|Q9CR57|RL14_MOUSE	24	3	3	5	4	5	4	4	5	0.125	0.125	0.208333	0.166667	0.208333	0.166667	0.166667	0.208333	0.000453528	0.000321939	0.00050144	0.000454722	0.000567422	0.000369831	0.000338966	0.000414316
F-actin-capping protein subunit beta OS=Mus musculus OX=10090 GN=Capzb PE=1 SV=3	sp|P47757|CAPZB_MOUSE	31	3	9	0	5	8	0	0	3	0.0967742	0.290323	0	0.16129	0.258065	0	0	0.0967742	0.000351119	0.00074773	0	0.000440054	0.000702871	0	0	0.000192456
EH domain-containing protein 1 OS=Mus musculus OX=10090 GN=Ehd1 PE=1 SV=1	sp|Q9WVK4|EHD1_MOUSE	61	0	0	0	3	3	3	0	4	0	0	0	0.0491803	0.0491803	0.0491803	0	0.0655738	0	0	0	0.00013418	0.000133949	0.00010913	0	0.000130408
ATP-dependent RNA helicase DDX3Y OS=Mus musculus OX=10090 GN=Ddx3y PE=1 SV=2	sp|Q62095|DDX3Y_MOUSE	73	2	3	2	5	6	4	6	8	0.0273973	0.0410959	0.0273973	0.0684932	0.0821918	0.0547945	0.0821918	0.109589	9.94034e-05	0.000105843	6.59428e-05	0.000186872	0.000223859	0.000121588	0.000167161	0.000217942
Ig lambda-1 chain V region OS=Mus musculus OX=10090 PE=1 SV=2	sp|P01723|LV1A_MOUSE (+1)	12	0	0	0	0	0	4	0	3	0	0	0	0	0	0.333333	0	0.25	0	0	0	0	0	0.000739662	0	0.000497179
Protein FAM210A OS=Mus musculus OX=10090 GN=Fam210a PE=1 SV=1	sp|Q8BGY7|F210A_MOUSE	32	0	3	0	0	2	7	7	4	0	0.09375	0	0	0.0625	0.21875	0.21875	0.125	0	0.000241454	0	0	0.000170226	0.000485403	0.000444893	0.00024859
Histone H1.3 OS=Mus musculus OX=10090 GN=H1-3 PE=1 SV=2	sp|P43277|H13_MOUSE	22	0	0	2	2	2	4	6	9	0	0	0.0909091	0.0909091	0.0909091	0.181818	0.272727	0.409091	0	0	0.00021881	0.00024803	0.000247602	0.000403452	0.000554672	0.000813566
28S ribosomal protein S36, mitochondrial OS=Mus musculus OX=10090 GN=Mrps36 PE=1 SV=1	sp|Q9CQX8|RT36_MOUSE	11	0	0	4	2	3	5	8	4	0	0	0.363636	0.181818	0.272727	0.454545	0.727273	0.363636	0	0	0.00087524	0.000496061	0.000742806	0.00100863	0.00147912	0.00072317
Transforming protein RhoA OS=Mus musculus OX=10090 GN=Rhoa PE=1 SV=1	sp|Q9QUI0|RHOA_MOUSE	22	2	3	0	0	3	4	6	6	0.0909091	0.136364	0	0	0.136364	0.181818	0.272727	0.272727	0.000329839	0.000351206	0	0	0.000371403	0.000403452	0.000554672	0.000542377
Actin-binding LIM protein 1 OS=Mus musculus OX=10090 GN=Ablim1 PE=1 SV=1	sp|Q8K4G5|ABLM1_MOUSE	97	0	3	0	3	7	0	0	4	0	0.0309278	0	0.0309278	0.0721649	0	0	0.0412371	0	7.96551e-05	0	8.43814e-05	0.00019655	0	0	8.20089e-05
60S ribosomal protein L21 OS=Mus musculus OX=10090 GN=Rpl21 PE=1 SV=3	sp|O09167|RL21_MOUSE	19	0	3	2	3	3	3	3	2	0	0.157895	0.105263	0.157895	0.157895	0.157895	0.157895	0.105263	0	0.00040666	0.000253359	0.000430789	0.000430046	0.000350366	0.000321126	0.000209339
[Pyruvate dehydrogenase (acetyl-transferring)] kinase isozyme 2, mitochondrial OS=Mus musculus OX=10090 GN=Pdk2 PE=1 SV=2	sp|Q9JK42|PDK2_MOUSE	46	0	0	0	3	4	4	3	5	0	0	0	0.0652174	0.0869565	0.0869565	0.0652174	0.108696	0	0	0	0.000177935	0.000236837	0.000192955	0.000132639	0.000216165
Transthyretin OS=Mus musculus OX=10090 GN=Ttr PE=1 SV=1	sp|P07309|TTHY_MOUSE	16	3	4	3	3	3	4	5	4	0.1875	0.25	0.1875	0.1875	0.1875	0.25	0.3125	0.25	0.000680292	0.000643878	0.000451296	0.000511563	0.000510679	0.000554746	0.000635562	0.000497179
Mitochondrial import inner membrane translocase subunit TIM44 OS=Mus musculus OX=10090 GN=Timm44 PE=1 SV=2	sp|O35857|TIM44_MOUSE	51	0	0	3	3	3	6	6	9	0	0	0.0588235	0.0588235	0.0588235	0.117647	0.117647	0.176471	0	0	0.000141583	0.00016049	0.000160213	0.000261057	0.00023927	0.00035095
NADH dehydrogenase [ubiquinone] flavoprotein 3, mitochondrial OS=Mus musculus OX=10090 GN=Ndufv3 PE=1 SV=1	sp|Q8BK30|NDUV3_MOUSE	12	0	0	6	3	4	3	7	4	0	0	0.5	0.25	0.333333	0.25	0.583333	0.333333	0	0	0.00120346	0.000682083	0.000907874	0.000554746	0.00118638	0.000662906
Plectin OS=Mus musculus OX=10090 GN=Plec PE=1 SV=3	sp|Q9QXS1|PLEC_MOUSE	534	8	0	0	0	0	0	0	0	0.0149813	0	0	0	0	0	0	0	5.43554e-05	0	0	0	0	0	0	0
Poly(rC)-binding protein 1 OS=Mus musculus OX=10090 GN=Pcbp1 PE=1 SV=1	sp|P60335|PCBP1_MOUSE	37	2	3	3	3	4	4	4	9	0.0540541	0.0810811	0.0810811	0.0810811	0.108108	0.108108	0.108108	0.243243	0.00019612	0.000208825	0.000195155	0.000221216	0.000294446	0.00023989	0.00021987	0.000483742
Serotransferrin OS=Mus musculus OX=10090 GN=Tf PE=1 SV=1	sp|Q921I1|TRFE_MOUSE	77	0	4	6	2	4	4	5	4	0	0.0519481	0.0779221	0.025974	0.0519481	0.0519481	0.0649351	0.0519481	0	0.000133793	0.000187551	7.08658e-05	0.000141487	0.000115272	0.000132065	0.00010331
Ras-related protein Rab-1A OS=Mus musculus OX=10090 GN=Rab1A PE=1 SV=3	sp|P62821|RAB1A_MOUSE	23	0	0	0	0	4	0	6	0	0	0	0	0	0.173913	0	0.26087	0	0	0	0	0	0.000473674	0	0.000530556	0
Heterogeneous nuclear ribonucleoprotein H OS=Mus musculus OX=10090 GN=Hnrnph1 PE=1 SV=3	sp|O35737|HNRH1_MOUSE	49	0	0	0	0	0	0	2	2	0	0	0	0	0	0	0.0408163	0.0408163	0	0	0	0	0	0	8.30121e-05	8.11721e-05
Troponin C, slow skeletal and cardiac muscles OS=Mus musculus OX=10090 GN=Tnnc1 PE=1 SV=1	sp|P19123|TNNC1_MOUSE	18	3	6	0	0	0	3	0	3	0.166667	0.333333	0	0	0	0.166667	0	0.166667	0.000604704	0.000858505	0	0	0	0.000369831	0	0.000331453
Dystrophin OS=Mus musculus OX=10090 GN=Dmd PE=1 SV=3	sp|P11531|DMD_MOUSE	426	0	4	4	4	4	3	0	3	0	0.00938967	0.00938967	0.00938967	0.00938967	0.00704225	0	0.00704225	0	2.41832e-05	2.26001e-05	2.56182e-05	2.55739e-05	1.56267e-05	0	1.4005e-05
40S ribosomal protein S8 OS=Mus musculus OX=10090 GN=Rps8 PE=1 SV=2	sp|P62242|RS8_MOUSE	24	4	6	2	4	4	2	2	7	0.166667	0.25	0.0833333	0.166667	0.166667	0.0833333	0.0833333	0.291667	0.000604704	0.000643878	0.000200576	0.000454722	0.000453937	0.000184915	0.000169483	0.000580042
Prostaglandin E synthase 2 OS=Mus musculus OX=10090 GN=Ptges2 PE=1 SV=3	sp|Q8BWM0|PGES2_MOUSE	43	2	5	0	4	3	4	4	3	0.0465116	0.116279	0	0.0930233	0.0697674	0.0930233	0.0930233	0.0697674	0.000168755	0.000299478	0	0.000253798	0.00019002	0.000206417	0.00018919	0.000138748
Annexin A1 OS=Mus musculus OX=10090 GN=Anxa1 PE=1 SV=2	sp|P10107|ANXA1_MOUSE	39	5	13	0	2	4	3	0	0	0.128205	0.333333	0	0.0512821	0.102564	0.0769231	0	0	0.000465157	0.000858505	0	0.000139915	0.000279346	0.000170691	0	0
Dynein light chain 2, cytoplasmic OS=Mus musculus OX=10090 GN=Dynll2 PE=1 SV=1	sp|Q9D0M5|DYL2_MOUSE	10	3	4	4	5	4	4	4	3	0.3	0.4	0.4	0.5	0.4	0.4	0.4	0.3	0.00108847	0.00103021	0.000962764	0.00136417	0.00108945	0.000887594	0.000813519	0.000596615
Heterogeneous nuclear ribonucleoprotein A1 OS=Mus musculus OX=10090 GN=Hnrnpa1 PE=1 SV=2	sp|P49312|ROA1_MOUSE	34	0	0	0	0	0	0	0	16	0	0	0	0	0	0	0	0.470588	0	0	0	0	0	0	0	0.000935867
Protein NDRG2 OS=Mus musculus OX=10090 GN=Ndrg2 PE=1 SV=1	sp|Q9QYG0|NDRG2_MOUSE	41	0	0	0	2	2	2	4	0	0	0	0	0.0487805	0.0487805	0.0487805	0.097561	0	0	0	0	0.000133089	0.00013286	0.000108243	0.000198419	0
Carnitine O-palmitoyltransferase 2, mitochondrial OS=Mus musculus OX=10090 GN=Cpt2 PE=1 SV=2	sp|P52825|CPT2_MOUSE	74	0	2	3	0	4	4	3	3	0	0.027027	0.0405405	0	0.0540541	0.0540541	0.0405405	0.0405405	0	6.96085e-05	9.75775e-05	0	0.000147223	0.000119945	8.24512e-05	8.06237e-05
Calcium/calmodulin-dependent protein kinase type II subunit delta OS=Mus musculus OX=10090 GN=Camk2d PE=1 SV=1	sp|Q6PHZ2|KCC2D_MOUSE	56	0	3	3	3	5	4	6	7	0	0.0535714	0.0535714	0.0535714	0.0892857	0.0714286	0.107143	0.125	0	0.000137974	0.000128942	0.000146161	0.000243181	0.000158499	0.000217907	0.00024859
Hexokinase HKDC1 OS=Mus musculus OX=10090 GN=Hkdc1 PE=2 SV=1	sp|Q91W97|HKDC1_MOUSE	102	0	0	0	0	0	0	4	0	0	0	0	0	0	0	0.0392157	0	0	0	0	0	0	0	7.97567e-05	0
Ryanodine receptor 1 OS=Mus musculus OX=10090 GN=Ryr1 PE=1 SV=1	sp|E9PZQ0|RYR1_MOUSE	565	0	2	0	0	0	0	0	0	0	0.00353982	0	0	0	0	0	0	0	9.11686e-06	0	0	0	0	0	0
NADH dehydrogenase [ubiquinone] 1 alpha subcomplex subunit 11 OS=Mus musculus OX=10090 GN=Ndufa11 PE=1 SV=2	sp|Q9D8B4|NDUAB_MOUSE	15	2	2	3	2	0	3	7	7	0.133333	0.133333	0.2	0.133333	0	0.2	0.466667	0.466667	0.000483763	0.000343402	0.000481382	0.000363778	0	0.000443797	0.000949105	0.000928068
60S ribosomal protein L9 OS=Mus musculus OX=10090 GN=Rpl9 PE=2 SV=2	sp|P51410|RL9_MOUSE	22	2	0	2	4	2	2	3	5	0.0909091	0	0.0909091	0.181818	0.0909091	0.0909091	0.136364	0.227273	0.000329839	0	0.00021881	0.000496061	0.000247602	0.000201726	0.000277336	0.000451981
Protein S100-A11 OS=Mus musculus OX=10090 GN=S100a11 PE=1 SV=1	sp|P50543|S10AB_MOUSE	11	6	3	0	0	4	3	3	4	0.545455	0.272727	0	0	0.363636	0.272727	0.272727	0.363636	0.00197903	0.000702413	0	0	0.000990409	0.000605178	0.000554672	0.00072317
Alpha-mannosidase 2C1 OS=Mus musculus OX=10090 GN=Man2c1 PE=1 SV=1	sp|Q91W89|MA2C1_MOUSE	116	0	3	4	6	5	3	5	3	0	0.0258621	0.0344828	0.0517241	0.0431034	0.0258621	0.0431034	0.0258621	0	6.66081e-05	8.29969e-05	0.000141121	0.000117398	5.73875e-05	8.76637e-05	5.14323e-05
60S ribosomal protein L24 OS=Mus musculus OX=10090 GN=Rpl24 PE=1 SV=2	sp|Q8BP67|RL24_MOUSE	18	2	2	4	2	2	4	5	0	0.111111	0.111111	0.222222	0.111111	0.111111	0.222222	0.277778	0	0.000403136	0.000286168	0.000534869	0.000303148	0.000302625	0.000493108	0.000564944	0
ATP synthase subunit delta, mitochondrial OS=Mus musculus OX=10090 GN=Atp5f1d PE=1 SV=1	sp|Q9D3D9|ATPD_MOUSE	18	2	2	2	2	2	4	4	2	0.111111	0.111111	0.111111	0.111111	0.111111	0.222222	0.222222	0.111111	0.000403136	0.000286168	0.000267435	0.000303148	0.000302625	0.000493108	0.000451955	0.000220969
Cytochrome c oxidase subunit 6A2, mitochondrial OS=Mus musculus OX=10090 GN=Cox6a2 PE=1 SV=2	sp|P43023|CX6A2_MOUSE	11	0	0	0	2	0	0	0	0	0	0	0	0.181818	0	0	0	0	0	0	0	0.000496061	0	0	0	0
Histidine ammonia-lyase OS=Mus musculus OX=10090 GN=Hal PE=1 SV=1	sp|P35492|HUTH_MOUSE	72	5	0	0	0	0	2	0	0	0.0694444	0	0	0	0	0.0277778	0	0	0.00025196	0	0	0	0	6.16385e-05	0	0
Ig kappa chain V-II region 7S34.1 OS=Mus musculus OX=10090 PE=1 SV=1	sp|P01630|KV2A6_MOUSE	12	2	3	2	3	2	4	3	3	0.166667	0.25	0.166667	0.25	0.166667	0.333333	0.25	0.25	0.000604704	0.000643878	0.000401152	0.000682083	0.000453937	0.000739662	0.000508449	0.000497179
S-formylglutathione hydrolase OS=Mus musculus OX=10090 GN=Esd PE=1 SV=1	sp|Q9R0P3|ESTD_MOUSE	31	0	2	4	5	5	0	2	5	0	0.0645161	0.129032	0.16129	0.16129	0	0.0645161	0.16129	0	0.000166162	0.000310569	0.000440054	0.000439294	0	0.000131213	0.000320761
Fermitin family homolog 2 OS=Mus musculus OX=10090 GN=Fermt2 PE=1 SV=1	sp|Q8CIB5|FERM2_MOUSE	78	0	0	3	2	4	4	6	4	0	0	0.0384615	0.025641	0.0512821	0.0512821	0.0769231	0.0512821	0	0	9.25735e-05	6.99573e-05	0.000139673	0.000113794	0.000156446	0.000101985
Elongation factor G, mitochondrial OS=Mus musculus OX=10090 GN=Gfm1 PE=1 SV=1	sp|Q8K0D5|EFGM_MOUSE	84	0	0	3	2	3	4	10	6	0	0	0.0357143	0.0238095	0.0357143	0.047619	0.119048	0.0714286	0	0	8.59611e-05	6.49603e-05	9.72723e-05	0.000105666	0.000242119	0.000142051
Caveolin-3 OS=Mus musculus OX=10090 GN=Cav3 PE=1 SV=1	sp|P51637|CAV3_MOUSE	17	0	0	3	0	0	4	3	4	0	0	0.176471	0	0	0.235294	0.176471	0.235294	0	0	0.000424749	0	0	0.000522114	0.000358905	0.000467933
Ig kappa chain V-V region MOPC 149 OS=Mus musculus OX=10090 PE=1 SV=1	sp|P01636|KV5A4_MOUSE	12	0	2	0	0	0	3	2	2	0	0.166667	0	0	0	0.25	0.166667	0.166667	0	0.000429252	0	0	0	0.000554746	0.000338966	0.000331453
Ras-related protein Rab-21 OS=Mus musculus OX=10090 GN=Rab21 PE=1 SV=4	sp|P35282|RAB21_MOUSE	24	2	3	2	2	0	0	0	2	0.0833333	0.125	0.0833333	0.0833333	0	0	0	0.0833333	0.000302352	0.000321939	0.000200576	0.000227361	0	0	0	0.000165726
Nebulin-related-anchoring protein OS=Mus musculus OX=10090 GN=Nrap PE=1 SV=3	sp|Q80XB4|NRAP_MOUSE	196	0	0	0	0	0	0	4	5	0	0	0	0	0	0	0.0204082	0.0255102	0	0	0	0	0	0	4.15061e-05	5.07326e-05
Coiled-coil-helix-coiled-coil-helix domain-containing protein 1 OS=Mus musculus OX=10090 GN=Chchd1 PE=1 SV=1	sp|Q9CQA6|CHCH1_MOUSE	14	5	2	4	4	3	3	4	4	0.357143	0.142857	0.285714	0.285714	0.214286	0.214286	0.285714	0.285714	0.00129579	0.000367931	0.000687689	0.000779524	0.000583634	0.000475497	0.000581085	0.000568205
Presequence protease, mitochondrial OS=Mus musculus OX=10090 GN=Pitrm1 PE=1 SV=1	sp|Q8K411|PREP_MOUSE	117	3	3	6	0	4	4	3	3	0.025641	0.025641	0.0512821	0	0.034188	0.034188	0.025641	0.025641	9.30314e-05	6.60388e-05	0.000123431	0	9.31153e-05	7.58627e-05	5.21486e-05	5.09927e-05
Galectin-1 OS=Mus musculus OX=10090 GN=Lgals1 PE=1 SV=3	sp|P16045|LEG1_MOUSE	15	0	0	5	0	4	5	5	7	0	0	0.333333	0	0.266667	0.333333	0.333333	0.466667	0	0	0.000802304	0	0.0007263	0.000739662	0.000677932	0.000928068
High affinity immunoglobulin gamma Fc receptor I OS=Mus musculus OX=10090 GN=Fcgr1 PE=1 SV=1	sp|P26151|FCGR1_MOUSE	45	0	6	3	4	2	5	6	4	0	0.133333	0.0666667	0.0888889	0.0444444	0.111111	0.133333	0.0888889	0	0.000343402	0.000160461	0.000242519	0.00012105	0.000246554	0.000271173	0.000176775
NADH dehydrogenase [ubiquinone] 1 beta subcomplex subunit 1 OS=Mus musculus OX=10090 GN=Ndufb1 PE=1 SV=1	sp|P0DN34|NDUB1_MOUSE	7	0	0	0	0	0	2	4	3	0	0	0	0	0	0.285714	0.571429	0.428571	0	0	0	0	0	0.000633996	0.00116217	0.000852307
HIG1 domain family member 1A, mitochondrial OS=Mus musculus OX=10090 GN=Higd1a PE=1 SV=1	sp|Q9JLR9|HIG1A_MOUSE	10	0	3	3	2	3	4	2	3	0	0.3	0.3	0.2	0.3	0.4	0.2	0.3	0	0.000772654	0.000722073	0.000545667	0.000817087	0.000887594	0.000406759	0.000596615
ATP synthase subunit a OS=Mus musculus OX=10090 GN=Mtatp6 PE=1 SV=1	sp|P00848|ATP6_MOUSE	25	0	0	0	0	0	4	0	0	0	0	0	0	0	0.16	0	0	0	0	0	0	0	0.000355038	0	0
Mitochondrial fission process protein 1 OS=Mus musculus OX=10090 GN=Mtfp1 PE=1 SV=1	sp|Q9CRB8|MTFP1_MOUSE	18	0	3	0	0	2	4	7	5	0	0.166667	0	0	0.111111	0.222222	0.388889	0.277778	0	0.000429252	0	0	0.000302625	0.000493108	0.000790921	0.000552421
Ryanodine receptor 2 OS=Mus musculus OX=10090 GN=Ryr2 PE=1 SV=1	sp|E9Q401|RYR2_MOUSE	565	0	0	0	0	0	2	6	4	0	0	0	0	0	0.00353982	0.0106195	0.00707965	0	0	0	0	0	7.85481e-06	2.15978e-05	1.40794e-05
Ig heavy chain V region MOPC 47A OS=Mus musculus OX=10090 PE=1 SV=1	sp|P01786|HVM17_MOUSE	13	0	3	0	2	2	2	0	3	0	0.230769	0	0.153846	0.153846	0.153846	0	0.230769	0	0.000594349	0	0.000419744	0.000419019	0.000341382	0	0.000458935
Fibrinogen gamma chain OS=Mus musculus OX=10090 GN=Fgg PE=1 SV=1	sp|Q8VCM7|FIBG_MOUSE	49	2	4	0	0	6	3	3	4	0.0408163	0.0816327	0	0	0.122449	0.0612245	0.0612245	0.0816327	0.000148091	0.000210246	0	0	0.000333505	0.000135856	0.000124518	0.000162344
Elongation factor 1-gamma OS=Mus musculus OX=10090 GN=Eef1g PE=1 SV=3	sp|Q9D8N0|EF1G_MOUSE	50	2	0	4	0	4	0	3	7	0.04	0	0.08	0	0.08	0	0.06	0.14	0.000145129	0	0.000192553	0	0.00021789	0	0.000122028	0.00027842
ATPase family AAA domain-containing protein 1 OS=Mus musculus OX=10090 GN=Atad1 PE=1 SV=1	sp|Q9D5T0|ATAD1_MOUSE	41	0	3	3	4	3	3	5	3	0	0.0731707	0.0731707	0.097561	0.0731707	0.0731707	0.121951	0.0731707	0	0.000188452	0.000176115	0.000266179	0.00019929	0.000162365	0.000248024	0.000145516
Valine--tRNA ligase OS=Mus musculus OX=10090 GN=Vars1 PE=1 SV=1	sp|Q9Z1Q9|SYVC_MOUSE	140	0	0	0	0	3	3	4	6	0	0	0	0	0.0214286	0.0214286	0.0285714	0.0428571	0	0	0	0	5.83634e-05	4.75497e-05	5.81085e-05	8.52307e-05
Myosin light chain kinase 3 OS=Mus musculus OX=10090 GN=Mylk3 PE=1 SV=1	sp|Q3UIZ8|MYLK3_MOUSE	86	0	4	5	0	0	6	8	5	0	0.0465116	0.0581395	0	0	0.0697674	0.0930233	0.0581395	0	0.000119791	0.000139937	0	0	0.000154813	0.00018919	0.000115623
Heterogeneous nuclear ribonucleoprotein Q OS=Mus musculus OX=10090 GN=Syncrip PE=1 SV=2	sp|Q7TMK9|HNRPQ_MOUSE	70	0	0	3	2	0	0	3	5	0	0	0.0428571	0.0285714	0	0	0.0428571	0.0714286	0	0	0.000103153	7.79524e-05	0	0	8.71627e-05	0.000142051
NADH dehydrogenase [ubiquinone] 1 beta subcomplex subunit 11, mitochondrial OS=Mus musculus OX=10090 GN=Ndufb11 PE=1 SV=2	sp|O09111|NDUBB_MOUSE	17	0	0	0	0	3	3	2	3	0	0	0	0	0.176471	0.176471	0.117647	0.176471	0	0	0	0	0.000480639	0.000391586	0.00023927	0.00035095
BAG family molecular chaperone regulator 3 OS=Mus musculus OX=10090 GN=Bag3 PE=1 SV=2	sp|Q9JLV1|BAG3_MOUSE	62	0	0	7	4	3	2	2	4	0	0	0.112903	0.0645161	0.0483871	0.0322581	0.0322581	0.0645161	0	0	0.000271748	0.000176022	0.000131788	7.15802e-05	6.56063e-05	0.000128304
Rho guanine nucleotide exchange factor 5 OS=Mus musculus OX=10090 GN=Arhgef5 PE=1 SV=1	sp|E9Q7D5|ARHG5_MOUSE	177	0	0	0	0	0	8	5	7	0	0	0	0	0	0.0451977	0.0282486	0.039548	0	0	0	0	0	0.000100293	5.74519e-05	7.86498e-05
Cell division control protein 42 homolog OS=Mus musculus OX=10090 GN=Cdc42 PE=1 SV=2	sp|P60766|CDC42_MOUSE	21	0	0	0	0	2	4	5	10	0	0	0	0	0.0952381	0.190476	0.238095	0.47619	0	0	0	0	0.000259393	0.000422664	0.000484237	0.000947008
MICOS complex subunit MIC13 OS=Mus musculus OX=10090 GN=Micos13 PE=1 SV=1	sp|Q8R404|MIC13_MOUSE	13	0	0	3	3	3	4	4	3	0	0	0.230769	0.230769	0.230769	0.307692	0.307692	0.230769	0	0	0.000555441	0.000629615	0.000628528	0.000682765	0.000625784	0.000458935
Nebulette OS=Mus musculus OX=10090 GN=Nebl PE=1 SV=1	sp|Q0II04|NEBL_MOUSE	52	0	2	0	3	6	0	3	6	0	0.0384615	0	0.0576923	0.115385	0	0.0576923	0.115385	0	9.90582e-05	0	0.000157404	0.000314264	0	0.000117334	0.000229467
F-actin-capping protein subunit alpha-2 OS=Mus musculus OX=10090 GN=Capza2 PE=1 SV=3	sp|P47754|CAZA2_MOUSE	33	2	5	2	0	4	2	0	2	0.0606061	0.151515	0.0606061	0	0.121212	0.0606061	0	0.0606061	0.000219892	0.000390229	0.000145873	0	0.000330136	0.000134484	0	0.000120528
Gap junction alpha-1 protein OS=Mus musculus OX=10090 GN=Gja1 PE=1 SV=2	sp|P23242|CXA1_MOUSE	43	0	2	2	0	4	4	6	5	0	0.0465116	0.0465116	0	0.0930233	0.0930233	0.139535	0.116279	0	0.000119791	0.000111949	0	0.00025336	0.000206417	0.000283786	0.000231246
Ras-related C3 botulinum toxin substrate 1 OS=Mus musculus OX=10090 GN=Rac1 PE=1 SV=1	sp|P63001|RAC1_MOUSE	21	0	2	0	0	3	3	4	10	0	0.0952381	0	0	0.142857	0.142857	0.190476	0.47619	0	0.000245287	0	0	0.000389089	0.000316998	0.00038739	0.000947008
Protein-cysteine N-palmitoyltransferase HHAT-like protein OS=Mus musculus OX=10090 GN=Hhatl PE=1 SV=2	sp|Q9D1G3|HHATL_MOUSE	56	3	2	0	3	5	4	4	6	0.0535714	0.0357143	0	0.0535714	0.0892857	0.0714286	0.0714286	0.107143	0.000194369	9.19826e-05	0	0.000146161	0.000243181	0.000158499	0.000145271	0.000213077
Cullin-associated NEDD8-dissociated protein 2 OS=Mus musculus OX=10090 GN=Cand2 PE=1 SV=2	sp|Q6ZQ73|CAND2_MOUSE	136	0	3	5	0	3	0	6	5	0	0.0220588	0.0367647	0	0.0220588	0	0.0441176	0.0367647	0	5.68128e-05	8.84894e-05	0	6.00799e-05	0	8.97263e-05	7.31146e-05
Mitochondrial import receptor subunit TOM22 homolog OS=Mus musculus OX=10090 GN=Tomm22 PE=1 SV=3	sp|Q9CPQ3|TOM22_MOUSE	16	2	2	0	2	2	5	5	4	0.125	0.125	0	0.125	0.125	0.3125	0.3125	0.25	0.000453528	0.000321939	0	0.000341042	0.000340453	0.000693433	0.000635562	0.000497179
NADH dehydrogenase [ubiquinone] 1 beta subcomplex subunit 3 OS=Mus musculus OX=10090 GN=Ndufb3 PE=1 SV=1	sp|Q9CQZ6|NDUB3_MOUSE	12	0	3	0	2	3	5	3	0	0	0.25	0	0.166667	0.25	0.416667	0.25	0	0	0.000643878	0	0.000454722	0.000680906	0.000924577	0.000508449	0
60S ribosomal protein L17 OS=Mus musculus OX=10090 GN=Rpl17 PE=1 SV=3	sp|Q9CPR4|RL17_MOUSE	21	0	4	4	0	0	0	0	2	0	0.190476	0.190476	0	0	0	0	0.0952381	0	0.000490574	0.000458459	0	0	0	0	0.000189402
Ig kappa chain V-IV region S107B OS=Mus musculus OX=10090 PE=4 SV=1	sp|P01680|KV4A1_MOUSE	14	0	3	0	0	0	3	3	0	0	0.214286	0	0	0	0.214286	0.214286	0	0	0.000551896	0	0	0	0.000475497	0.000435814	0
ATP-dependent RNA helicase DDX1 OS=Mus musculus OX=10090 GN=Ddx1 PE=1 SV=1	sp|Q91VR5|DDX1_MOUSE	83	0	0	0	0	2	2	5	5	0	0	0	0	0.0240964	0.0240964	0.060241	0.060241	0	0	0	0	6.56295e-05	5.34695e-05	0.000122518	0.000119802
Metaxin-2 OS=Mus musculus OX=10090 GN=Mtx2 PE=1 SV=1	sp|O88441|MTX2_MOUSE	30	4	2	3	3	3	3	4	3	0.133333	0.0666667	0.1	0.1	0.1	0.1	0.133333	0.1	0.000483763	0.000171701	0.000240691	0.000272833	0.000272362	0.000221899	0.000271173	0.000198872
Protein transport protein Sec31B OS=Mus musculus OX=10090 GN=Sec31b PE=1 SV=2	sp|Q3TZ89|SC31B_MOUSE	126	3	0	0	0	0	0	0	0	0.0238095	0	0	0	0	0	0	0	8.63863e-05	0	0	0	0	0	0	0
Alpha-1-antitrypsin 1-5 OS=Mus musculus OX=10090 GN=Serpina1e PE=1 SV=1	sp|Q00898|A1AT5_MOUSE	46	2	0	3	2	4	4	3	4	0.0434783	0	0.0652174	0.0434783	0.0869565	0.0869565	0.0652174	0.0869565	0.000157749	0	0.000156972	0.000118623	0.000236837	0.000192955	0.000132639	0.000172932
60S ribosomal protein L7 OS=Mus musculus OX=10090 GN=Rpl7 PE=1 SV=2	sp|P14148|RL7_MOUSE	31	0	0	5	2	0	0	10	0	0	0	0.16129	0.0645161	0	0	0.322581	0	0	0	0.000388211	0.000176022	0	0	0.000656063	0
Translationally-controlled tumor protein OS=Mus musculus OX=10090 GN=Tpt1 PE=1 SV=1	sp|P63028|TCTP_MOUSE	19	0	4	0	0	3	2	6	5	0	0.210526	0	0	0.157895	0.105263	0.315789	0.263158	0	0.000542213	0	0	0.000430046	0.000233577	0.000642252	0.000523347
39S ribosomal protein L11, mitochondrial OS=Mus musculus OX=10090 GN=Mrpl11 PE=1 SV=1	sp|Q9CQF0|RM11_MOUSE	21	2	4	2	2	5	5	6	2	0.0952381	0.190476	0.0952381	0.0952381	0.238095	0.238095	0.285714	0.0952381	0.000345545	0.000490574	0.00022923	0.000259841	0.000648482	0.00052833	0.000581085	0.000189402
Ferritin light chain 1 OS=Mus musculus OX=10090 GN=Ftl1 PE=1 SV=2	sp|P29391|FRIL1_MOUSE	21	0	3	3	0	2	6	7	4	0	0.142857	0.142857	0	0.0952381	0.285714	0.333333	0.190476	0	0.000367931	0.000343844	0	0.000259393	0.000633996	0.000677932	0.000378803
Guanine nucleotide-binding protein G(i) subunit alpha-2 OS=Mus musculus OX=10090 GN=Gnai2 PE=1 SV=5	sp|P08752|GNAI2_MOUSE	40	0	0	0	2	2	3	4	5	0	0	0	0.05	0.05	0.075	0.1	0.125	0	0	0	0.000136417	0.000136181	0.000166424	0.00020338	0.00024859
Kinesin-1 heavy chain OS=Mus musculus OX=10090 GN=Kif5b PE=1 SV=3	sp|Q61768|KINH_MOUSE	110	0	0	0	0	4	6	9	5	0	0	0	0	0.0363636	0.0545455	0.0818182	0.0454545	0	0	0	0	9.90409e-05	0.000121036	0.000166402	9.03962e-05
X-ray repair cross-complementing protein 5 OS=Mus musculus OX=10090 GN=Xrcc5 PE=1 SV=4	sp|P27641|XRCC5_MOUSE	83	0	0	0	0	6	7	0	7	0	0	0	0	0.0722892	0.0843373	0	0.0843373	0	0	0	0	0.000196888	0.000187143	0	0.000167723
[Pyruvate dehydrogenase (acetyl-transferring)] kinase isozyme 1, mitochondrial OS=Mus musculus OX=10090 GN=Pdk1 PE=1 SV=2	sp|Q8BFP9|PDK1_MOUSE	49	0	0	0	0	0	0	0	3	0	0	0	0	0	0	0	0.0612245	0	0	0	0	0	0	0	0.000121758
Fructose-bisphosphate aldolase C OS=Mus musculus OX=10090 GN=Aldoc PE=1 SV=4	sp|P05063|ALDOC_MOUSE	39	0	0	0	0	0	0	0	4	0	0	0	0	0	0	0	0.102564	0	0	0	0	0	0	0	0.000203971
Sodium/potassium-transporting ATPase subunit beta-1 OS=Mus musculus OX=10090 GN=Atp1b1 PE=1 SV=1	sp|P14094|AT1B1_MOUSE	35	2	3	2	2	0	2	4	7	0.0571429	0.0857143	0.0571429	0.0571429	0	0.0571429	0.114286	0.2	0.000207327	0.000220758	0.000137538	0.000155905	0	0.000126799	0.000232434	0.000397743
Mitochondrial fission 1 protein OS=Mus musculus OX=10090 GN=Fis1 PE=1 SV=1	sp|Q9CQ92|FIS1_MOUSE	17	0	0	3	2	2	6	0	4	0	0	0.176471	0.117647	0.117647	0.352941	0	0.235294	0	0	0.000424749	0.00032098	0.000320426	0.000783171	0	0.000467933
N-acetylneuraminate 9-O-acetyltransferase OS=Mus musculus OX=10090 GN=Casd1 PE=2 SV=1	sp|Q7TN73|CASD1_MOUSE	92	0	3	3	2	0	0	3	2	0	0.0326087	0.0326087	0.0217391	0	0	0.0326087	0.0217391	0	8.39842e-05	7.84862e-05	5.93116e-05	0	0	6.63195e-05	4.3233e-05
Perilipin-4 OS=Mus musculus OX=10090 GN=Plin4 PE=1 SV=2	sp|O88492|PLIN4_MOUSE	139	0	0	3	2	0	4	4	4	0	0	0.0215827	0.0143885	0	0.028777	0.028777	0.028777	0	0	5.19477e-05	3.92566e-05	0	6.38557e-05	5.85265e-05	5.72293e-05
NADH dehydrogenase [ubiquinone] 1 beta subcomplex subunit 7 OS=Mus musculus OX=10090 GN=Ndufb7 PE=1 SV=3	sp|Q9CR61|NDUB7_MOUSE	16	0	0	2	0	3	3	3	5	0	0	0.125	0	0.1875	0.1875	0.1875	0.3125	0	0	0.000300864	0	0.000510679	0.00041606	0.000381337	0.000621474
UPF0598 protein C8orf82 homolog OS=Mus musculus OX=10090 PE=1 SV=1	sp|Q8VE95|CH082_MOUSE	24	2	0	3	3	3	3	4	4	0.0833333	0	0.125	0.125	0.125	0.125	0.166667	0.166667	0.000302352	0	0.000300864	0.000341042	0.000340453	0.000277373	0.000338966	0.000331453
Plasminogen OS=Mus musculus OX=10090 GN=Plg PE=1 SV=3	sp|P20918|PLMN_MOUSE	91	2	9	0	0	4	0	0	2	0.021978	0.0989011	0	0	0.043956	0	0	0.021978	7.97412e-05	0.000254721	0	0	0.00011972	0	0	4.37081e-05
Ras-related protein Rab-8A OS=Mus musculus OX=10090 GN=Rab8a PE=1 SV=2	sp|P55258|RAB8A_MOUSE	24	0	0	0	0	0	2	3	0	0	0	0	0	0	0.0833333	0.125	0	0	0	0	0	0	0.000184915	0.000254225	0
2-oxoisovalerate dehydrogenase subunit beta, mitochondrial OS=Mus musculus OX=10090 GN=Bckdhb PE=1 SV=2	sp|Q6P3A8|ODBB_MOUSE	43	2	3	0	3	3	3	3	3	0.0465116	0.0697674	0	0.0697674	0.0697674	0.0697674	0.0697674	0.0697674	0.000168755	0.000179687	0	0.000190349	0.00019002	0.000154813	0.000141893	0.000138748
28S ribosomal protein S9, mitochondrial OS=Mus musculus OX=10090 GN=Mrps9 PE=1 SV=3	sp|Q9D7N3|RT09_MOUSE	45	0	4	3	2	3	4	4	5	0	0.0888889	0.0666667	0.0444444	0.0666667	0.0888889	0.0888889	0.111111	0	0.000228935	0.000160461	0.000121259	0.000181575	0.000197243	0.000180782	0.000220969
Moesin OS=Mus musculus OX=10090 GN=Msn PE=1 SV=3	sp|P26041|MOES_MOUSE	68	0	0	0	0	0	0	0	12	0	0	0	0	0	0	0	0.176471	0	0	0	0	0	0	0	0.00035095
Envoplakin OS=Mus musculus OX=10090 GN=Evpl PE=1 SV=3	sp|Q9D952|EVPL_MOUSE	232	3	0	0	0	0	0	0	0	0.012931	0	0	0	0	0	0	0	4.69167e-05	0	0	0	0	0	0	0
Collagen alpha-1(XV) chain OS=Mus musculus OX=10090 GN=Col15a1 PE=1 SV=2	sp|O35206|COFA1_MOUSE	140	3	6	2	3	8	0	0	0	0.0214286	0.0428571	0.0142857	0.0214286	0.0571429	0	0	0	7.77477e-05	0.000110379	3.43844e-05	5.84643e-05	0.000155636	0	0	0
60S ribosomal protein L35 OS=Mus musculus OX=10090 GN=Rpl35 PE=1 SV=1	sp|Q6ZWV7|RL35_MOUSE	15	0	0	2	0	2	0	3	7	0	0	0.133333	0	0.133333	0	0.2	0.466667	0	0	0.000320921	0	0.00036315	0	0.000406759	0.000928068
ATP synthase subunit ATP5MPL, mitochondrial OS=Mus musculus OX=10090 GN=Atp5mpl PE=1 SV=1	sp|P56379|ATP68_MOUSE	7	0	3	0	3	0	0	4	0	0	0.428571	0	0.428571	0	0	0.571429	0	0	0.00110379	0	0.00116929	0	0	0.00116217	0
Glutamine synthetase OS=Mus musculus OX=10090 GN=Glul PE=1 SV=6	sp|P15105|GLNA_MOUSE	42	0	0	0	3	2	2	3	3	0	0	0	0.0714286	0.047619	0.047619	0.0714286	0.0714286	0	0	0	0.000194881	0.000129696	0.000105666	0.000145271	0.000142051
Serine/threonine-protein phosphatase 2A catalytic subunit alpha isoform OS=Mus musculus OX=10090 GN=Ppp2ca PE=1 SV=1	sp|P63330|PP2AA_MOUSE	36	4	3	0	0	4	3	3	2	0.111111	0.0833333	0	0	0.111111	0.0833333	0.0833333	0.0555556	0.000403136	0.000214626	0	0	0.000302625	0.000184915	0.000169483	0.000110484
40S ribosomal protein S10 OS=Mus musculus OX=10090 GN=Rps10 PE=1 SV=1	sp|P63325|RS10_MOUSE	19	2	2	0	0	4	3	3	0	0.105263	0.105263	0	0	0.210526	0.157895	0.157895	0	0.000381918	0.000271107	0	0	0.000573394	0.000350366	0.000321126	0
NADH dehydrogenase [ubiquinone] 1 alpha subcomplex subunit 3 OS=Mus musculus OX=10090 GN=Ndufa3 PE=1 SV=1	sp|Q9CQ91|NDUA3_MOUSE	9	2	2	2	2	0	3	2	2	0.222222	0.222222	0.222222	0.222222	0	0.333333	0.222222	0.222222	0.000806272	0.000572336	0.000534869	0.000606296	0	0.000739662	0.000451955	0.000441937
Translational activator of cytochrome c oxidase 1 OS=Mus musculus OX=10090 GN=Taco1 PE=1 SV=1	sp|Q8K0Z7|TACO1_MOUSE	32	3	3	0	3	3	0	3	3	0.09375	0.09375	0	0.09375	0.09375	0	0.09375	0.09375	0.000340146	0.000241454	0	0.000255781	0.00025534	0	0.000190668	0.000186442
Polyadenylate-binding protein 1 OS=Mus musculus OX=10090 GN=Pabpc1 PE=1 SV=2	sp|P29341|PABP1_MOUSE	71	0	0	0	2	0	0	0	0	0	0	0	0.028169	0	0	0	0	0	0	0	7.68545e-05	0	0	0	0
Coagulation factor XIII A chain OS=Mus musculus OX=10090 GN=F13a1 PE=1 SV=3	sp|Q8BH61|F13A_MOUSE	83	0	0	0	0	4	5	5	6	0	0	0	0	0.0481928	0.060241	0.060241	0.0722892	0	0	0	0	0.000131259	0.000133674	0.000122518	0.000143763
Profilin-1 OS=Mus musculus OX=10090 GN=Pfn1 PE=1 SV=2	sp|P62962|PROF1_MOUSE	15	0	2	2	0	3	3	6	7	0	0.133333	0.133333	0	0.2	0.2	0.4	0.466667	0	0.000343402	0.000320921	0	0.000544725	0.000443797	0.000813519	0.000928068
NADH dehydrogenase [ubiquinone] 1 beta subcomplex subunit 9 OS=Mus musculus OX=10090 GN=Ndufb9 PE=1 SV=3	sp|Q9CQJ8|NDUB9_MOUSE	22	0	0	0	0	3	2	8	0	0	0	0	0	0.136364	0.0909091	0.363636	0	0	0	0	0	0.000371403	0.000201726	0.000739562	0
MAP/microtubule affinity-regulating kinase 3 OS=Mus musculus OX=10090 GN=Mark3 PE=1 SV=2	sp|Q03141|MARK3_MOUSE	84	0	5	2	2	0	2	2	0	0	0.0595238	0.0238095	0.0238095	0	0.0238095	0.0238095	0	0	0.000153304	5.73074e-05	6.49603e-05	0	5.2833e-05	4.84237e-05	0
Protein S100-A14 OS=Mus musculus OX=10090 GN=S100a14 PE=1 SV=1	sp|Q9D2Q8|S10AE_MOUSE	12	4	3	2	3	2	2	2	0	0.333333	0.25	0.166667	0.25	0.166667	0.166667	0.166667	0	0.00120941	0.000643878	0.000401152	0.000682083	0.000453937	0.000369831	0.000338966	0
Macrophage migration inhibitory factor OS=Mus musculus OX=10090 GN=Mif PE=1 SV=2	sp|P34884|MIF_MOUSE	13	0	0	0	2	0	0	2	2	0	0	0	0.153846	0	0	0.153846	0.153846	0	0	0	0.000419744	0	0	0.000312892	0.000305956
Complex I assembly factor ACAD9, mitochondrial OS=Mus musculus OX=10090 GN=Acad9 PE=1 SV=2	sp|Q8JZN5|ACAD9_MOUSE	69	0	2	3	2	2	2	2	3	0	0.0289855	0.0434783	0.0289855	0.0289855	0.0289855	0.0289855	0.0434783	0	7.46526e-05	0.000104648	7.90821e-05	7.89456e-05	6.43184e-05	5.89506e-05	8.6466e-05
Obg-like ATPase 1 OS=Mus musculus OX=10090 GN=Ola1 PE=1 SV=1	sp|Q9CZ30|OLA1_MOUSE	45	0	0	0	0	0	0	2	0	0	0	0	0	0	0	0.0444444	0	0	0	0	0	0	0	9.0391e-05	0
Phosphatidylethanolamine-binding protein 1 OS=Mus musculus OX=10090 GN=Pebp1 PE=1 SV=3	sp|P70296|PEBP1_MOUSE	21	2	2	3	0	3	4	5	0	0.0952381	0.0952381	0.142857	0	0.142857	0.190476	0.238095	0	0.000345545	0.000245287	0.000343844	0	0.000389089	0.000422664	0.000484237	0
Carbonyl reductase [NADPH] 1 OS=Mus musculus OX=10090 GN=Cbr1 PE=1 SV=3	sp|P48758|CBR1_MOUSE	31	2	2	5	2	2	0	3	3	0.0645161	0.0645161	0.16129	0.0645161	0.0645161	0	0.0967742	0.0967742	0.000234079	0.000166162	0.000388211	0.000176022	0.000175718	0	0.000196819	0.000192456
Acetyl-CoA carboxylase 2 OS=Mus musculus OX=10090 GN=Acacb PE=1 SV=1	sp|E9Q4Z2|ACACB_MOUSE	276	0	0	0	0	0	0	0	6	0	0	0	0	0	0	0	0.0217391	0	0	0	0	0	0	0	4.3233e-05
Apolipoprotein A-I OS=Mus musculus OX=10090 GN=Apoa1 PE=1 SV=2	sp|Q00623|APOA1_MOUSE	31	0	2	3	3	0	0	0	0	0	0.0645161	0.0967742	0.0967742	0	0	0	0	0	0.000166162	0.000232927	0.000264032	0	0	0	0
Resistin-like gamma OS=Mus musculus OX=10090 GN=Retnlg PE=1 SV=1	sp|Q8K426|RETNG_MOUSE	13	3	4	3	2	4	4	4	0	0.230769	0.307692	0.230769	0.153846	0.307692	0.307692	0.307692	0	0.000837283	0.000792466	0.000555441	0.000419744	0.000838038	0.000682765	0.000625784	0
Cytochrome c oxidase subunit 7A2, mitochondrial OS=Mus musculus OX=10090 GN=Cox7a2 PE=1 SV=2	sp|P48771|CX7A2_MOUSE	9	0	0	3	2	5	5	6	2	0	0	0.333333	0.222222	0.555556	0.555556	0.666667	0.222222	0	0	0.000802304	0.000606296	0.00151312	0.00123277	0.00135586	0.000441937
Endonuclease G, mitochondrial OS=Mus musculus OX=10090 GN=Endog PE=1 SV=1	sp|O08600|NUCG_MOUSE	32	0	0	3	0	5	3	0	0	0	0	0.09375	0	0.15625	0.09375	0	0	0	0	0.000225648	0	0.000425566	0.00020803	0	0
Collagen alpha-1(I) chain OS=Mus musculus OX=10090 GN=Col1a1 PE=1 SV=4	sp|P11087|CO1A1_MOUSE	138	0	0	0	0	4	0	0	0	0	0	0	0	0.0289855	0	0	0	0	0	0	0	7.89456e-05	0	0	0
Basigin OS=Mus musculus OX=10090 GN=Bsg PE=1 SV=2	sp|P18572|BASI_MOUSE	42	2	2	2	0	2	2	5	6	0.047619	0.047619	0.047619	0	0.047619	0.047619	0.119048	0.142857	0.000172773	0.000122644	0.000114615	0	0.000129696	0.000105666	0.000242119	0.000284102
40S ribosomal protein SA OS=Mus musculus OX=10090 GN=Rpsa PE=1 SV=4	sp|P14206|RSSA_MOUSE	33	2	2	0	2	2	2	2	7	0.0606061	0.0606061	0	0.0606061	0.0606061	0.0606061	0.0606061	0.212121	0.000219892	0.000156092	0	0.000165354	0.000165068	0.000134484	0.00012326	0.000421849
E3 ubiquitin-protein ligase NEDD4 OS=Mus musculus OX=10090 GN=Nedd4 PE=1 SV=3	sp|P46935|NEDD4_MOUSE	103	0	3	2	0	3	3	3	2	0	0.0291262	0.0194175	0	0.0291262	0.0291262	0.0291262	0.0194175	0	7.5015e-05	4.67361e-05	0	7.93288e-05	6.46306e-05	5.92368e-05	3.86159e-05
Collagen alpha-1(IV) chain OS=Mus musculus OX=10090 GN=Col4a1 PE=1 SV=4	sp|P02463|CO4A1_MOUSE	161	2	4	3	3	2	0	0	2	0.0124224	0.0248447	0.0186335	0.0186335	0.0124224	0	0	0.0124224	4.50711e-05	6.39879e-05	4.48493e-05	5.08385e-05	3.38338e-05	0	0	2.47046e-05
28S ribosomal protein S6, mitochondrial OS=Mus musculus OX=10090 GN=Mrps6 PE=1 SV=3	sp|P58064|RT06_MOUSE	14	0	3	2	2	3	3	4	3	0	0.214286	0.142857	0.142857	0.214286	0.214286	0.285714	0.214286	0	0.000551896	0.000343844	0.000389762	0.000583634	0.000475497	0.000581085	0.000426154
39S ribosomal protein L37, mitochondrial OS=Mus musculus OX=10090 GN=Mrpl37 PE=1 SV=1	sp|Q921S7|RM37_MOUSE	48	0	0	0	0	0	4	4	6	0	0	0	0	0	0.0833333	0.0833333	0.125	0	0	0	0	0	0.000184915	0.000169483	0.00024859
Fibrinogen beta chain OS=Mus musculus OX=10090 GN=Fgb PE=1 SV=1	sp|Q8K0E8|FIBB_MOUSE	55	0	3	3	0	5	0	0	6	0	0.0545455	0.0545455	0	0.0909091	0	0	0.109091	0	0.000140483	0.000131286	0	0.000247602	0	0	0.000216951
Protein disulfide-isomerase OS=Mus musculus OX=10090 GN=P4hb PE=1 SV=2	sp|P09103|PDIA1_MOUSE	57	0	0	0	0	0	0	0	5	0	0	0	0	0	0	0	0.0877193	0	0	0	0	0	0	0	0.000174449
Ig heavy chain V regions TEPC 15/S107/HPCM1/HPCM2/HPCM3 OS=Mus musculus OX=10090 PE=1 SV=1	sp|P01787|HVM18_MOUSE (+3)	14	2	4	0	0	2	2	2	3	0.142857	0.285714	0	0	0.142857	0.142857	0.142857	0.214286	0.000518318	0.000735861	0	0	0.000389089	0.000316998	0.000290542	0.000426154
Actin-related protein 2/3 complex subunit 4 OS=Mus musculus OX=10090 GN=Arpc4 PE=1 SV=3	sp|P59999|ARPC4_MOUSE	20	0	0	0	0	3	0	0	0	0	0	0	0	0.15	0	0	0	0	0	0	0	0.000408544	0	0	0
3-hydroxyisobutyrate dehydrogenase, mitochondrial OS=Mus musculus OX=10090 GN=Hibadh PE=1 SV=1	sp|Q99L13|3HIDH_MOUSE	35	0	4	2	2	0	3	6	2	0	0.114286	0.0571429	0.0571429	0	0.0857143	0.171429	0.0571429	0	0.000294344	0.000137538	0.000155905	0	0.000190199	0.000348651	0.000113641
39S ribosomal protein L34, mitochondrial OS=Mus musculus OX=10090 GN=Mrpl34 PE=1 SV=1	sp|Q99N91|RM34_MOUSE	11	3	2	2	2	2	3	2	3	0.272727	0.181818	0.181818	0.181818	0.181818	0.272727	0.181818	0.272727	0.000989516	0.000468275	0.00043762	0.000496061	0.000495204	0.000605178	0.000369781	0.000542377
Elongation factor 1-delta OS=Mus musculus OX=10090 GN=Eef1d PE=1 SV=3	sp|P57776|EF1D_MOUSE	31	0	2	0	0	4	3	5	5	0	0.0645161	0	0	0.129032	0.0967742	0.16129	0.16129	0	0.000166162	0	0	0.000351435	0.000214741	0.000328032	0.000320761
UDP-glucose:glycoprotein glucosyltransferase 1 OS=Mus musculus OX=10090 GN=Uggt1 PE=1 SV=4	sp|Q6P5E4|UGGG1_MOUSE	176	0	0	2	3	0	3	5	0	0	0	0.0113636	0.0170455	0	0.0170455	0.0284091	0	0	0	2.73513e-05	4.65057e-05	0	3.78236e-05	5.77783e-05	0
DnaJ homolog subfamily A member 3, mitochondrial OS=Mus musculus OX=10090 GN=Dnaja3 PE=1 SV=1	sp|Q99M87|DNJA3_MOUSE	52	0	0	3	5	0	4	0	5	0	0	0.0576923	0.0961538	0	0.0769231	0	0.0961538	0	0	0.00013886	0.00026234	0	0.000170691	0	0.000191223
Serine/threonine-protein phosphatase PP1-beta catalytic subunit OS=Mus musculus OX=10090 GN=Ppp1cb PE=1 SV=3	sp|P62141|PP1B_MOUSE	37	2	2	0	0	5	4	5	2	0.0540541	0.0540541	0	0	0.135135	0.108108	0.135135	0.0540541	0.00019612	0.000139217	0	0	0.000368057	0.00023989	0.000274837	0.000107498
T-complex protein 1 subunit alpha OS=Mus musculus OX=10090 GN=Tcp1 PE=1 SV=3	sp|P11983|TCPA_MOUSE	60	0	0	0	0	0	2	5	6	0	0	0	0	0	0.0333333	0.0833333	0.1	0	0	0	0	0	7.39662e-05	0.000169483	0.000198872
60S ribosomal protein L36a OS=Mus musculus OX=10090 GN=Rpl36a PE=3 SV=2	sp|P83882|RL36A_MOUSE	12	0	0	0	2	0	2	0	0	0	0	0	0.166667	0	0.166667	0	0	0	0	0	0.000454722	0	0.000369831	0	0
Striated muscle-specific serine/threonine-protein kinase OS=Mus musculus OX=10090 GN=Speg PE=1 SV=2	sp|Q62407|SPEG_MOUSE	354	0	0	0	3	0	0	4	3	0	0	0	0.00847458	0	0	0.0112994	0.00847458	0	0	0	2.31215e-05	0	0	2.29808e-05	1.68535e-05
60S ribosomal protein L32 OS=Mus musculus OX=10090 GN=Rpl32 PE=1 SV=2	sp|P62911|RL32_MOUSE	16	0	0	0	0	0	3	4	2	0	0	0	0	0	0.1875	0.25	0.125	0	0	0	0	0	0.00041606	0.000508449	0.00024859
Eukaryotic translation initiation factor 2 subunit 1 OS=Mus musculus OX=10090 GN=Eif2s1 PE=1 SV=3	sp|Q6ZWX6|IF2A_MOUSE	36	0	0	3	0	3	0	4	4	0	0	0.0833333	0	0.0833333	0	0.111111	0.111111	0	0	0.000200576	0	0.000226969	0	0.000225977	0.000220969
Collagen alpha-2(IV) chain OS=Mus musculus OX=10090 GN=Col4a2 PE=1 SV=4	sp|P08122|CO4A2_MOUSE	167	0	3	0	0	3	0	0	4	0	0.0179641	0	0	0.0179641	0	0	0.0239521	0	4.62667e-05	0	0	4.89274e-05	0	0	4.76339e-05
Nucleoside diphosphate-linked moiety X motif 8 OS=Mus musculus OX=10090 GN=Nudt8 PE=1 SV=1	sp|Q9CR24|NUDT8_MOUSE	23	0	0	0	0	3	0	5	4	0	0	0	0	0.130435	0	0.217391	0.173913	0	0	0	0	0.000355255	0	0.00044213	0.000345864
Clustered mitochondria protein homolog OS=Mus musculus OX=10090 GN=Cluh PE=1 SV=2	sp|Q5SW19|CLU_MOUSE	148	0	0	3	2	0	4	3	5	0	0	0.0202703	0.0135135	0	0.027027	0.0202703	0.0337838	0	0	4.87887e-05	3.68694e-05	0	5.99726e-05	4.12256e-05	6.71864e-05
Protein-L-isoaspartate(D-aspartate) O-methyltransferase OS=Mus musculus OX=10090 GN=Pcmt1 PE=1 SV=3	sp|P23506|PIMT_MOUSE	25	4	3	8	3	0	0	0	0	0.16	0.12	0.32	0.12	0	0	0	0	0.000580516	0.000309062	0.000770211	0.0003274	0	0	0	0
Beta-centractin OS=Mus musculus OX=10090 GN=Actr1b PE=1 SV=1	sp|Q8R5C5|ACTY_MOUSE	42	0	2	0	0	3	3	2	6	0	0.047619	0	0	0.0714286	0.0714286	0.047619	0.142857	0	0.000122644	0	0	0.000194545	0.000158499	9.68475e-05	0.000284102
Mitochondrial proton/calcium exchanger protein OS=Mus musculus OX=10090 GN=Letm1 PE=1 SV=1	sp|Q9Z2I0|LETM1_MOUSE	83	0	0	0	0	0	2	5	4	0	0	0	0	0	0.0240964	0.060241	0.0481928	0	0	0	0	0	5.34695e-05	0.000122518	9.58418e-05
5'-AMP-activated protein kinase subunit gamma-1 OS=Mus musculus OX=10090 GN=Prkag1 PE=1 SV=2	sp|O54950|AAKG1_MOUSE	38	0	0	0	0	4	3	5	5	0	0	0	0	0.105263	0.0789474	0.131579	0.131579	0	0	0	0	0.000286697	0.000175183	0.000267605	0.000261673
Alpha-1-antitrypsin 1-1 OS=Mus musculus OX=10090 GN=Serpina1a PE=1 SV=4	sp|P07758|A1AT1_MOUSE (+1)	46	0	0	3	3	0	0	0	3	0	0	0.0652174	0.0652174	0	0	0	0.0652174	0	0	0.000156972	0.000177935	0	0	0	0.000129699
Fatty acid-binding protein 5 OS=Mus musculus OX=10090 GN=Fabp5 PE=1 SV=3	sp|Q05816|FABP5_MOUSE	15	2	2	2	2	2	0	2	0	0.133333	0.133333	0.133333	0.133333	0.133333	0	0.133333	0	0.000483763	0.000343402	0.000320921	0.000363778	0.00036315	0	0.000271173	0
40S ribosomal protein S15 OS=Mus musculus OX=10090 GN=Rps15 PE=1 SV=2	sp|P62843|RS15_MOUSE	17	0	3	0	0	3	4	0	0	0	0.176471	0	0	0.176471	0.235294	0	0	0	0.000454502	0	0	0.000480639	0.000522114	0	0
Signal recognition particle 14 kDa protein OS=Mus musculus OX=10090 GN=Srp14 PE=1 SV=1	sp|P16254|SRP14_MOUSE	13	3	0	4	0	2	3	2	2	0.230769	0	0.307692	0	0.153846	0.230769	0.153846	0.153846	0.000837283	0	0.000740588	0	0.000419019	0.000512074	0.000312892	0.000305956
Mitochondrial import inner membrane translocase subunit Tim21 OS=Mus musculus OX=10090 GN=Timm21 PE=1 SV=2	sp|Q8CCM6|TIM21_MOUSE	28	0	0	0	0	0	0	0	2	0	0	0	0	0	0	0	0.0714286	0	0	0	0	0	0	0	0.000142051
Integrin-linked protein kinase OS=Mus musculus OX=10090 GN=Ilk PE=1 SV=2	sp|O55222|ILK_MOUSE	51	0	4	2	0	3	0	5	3	0	0.0784314	0.0392157	0	0.0588235	0	0.0980392	0.0588235	0	0.000202001	9.43887e-05	0	0.000160213	0	0.000199392	0.000116983
Tyrosine-protein phosphatase non-receptor type 11 OS=Mus musculus OX=10090 GN=Ptpn11 PE=1 SV=3	sp|P35235|PTN11_MOUSE	68	0	0	2	2	3	4	2	0	0	0	0.0294118	0.0294118	0.0441176	0.0588235	0.0294118	0	0	0	7.07915e-05	8.02451e-05	0.00012016	0.000130529	5.98176e-05	0
X-ray repair cross-complementing protein 6 OS=Mus musculus OX=10090 GN=Xrcc6 PE=1 SV=5	sp|P23475|XRCC6_MOUSE	69	0	0	0	0	5	5	3	4	0	0	0	0	0.0724638	0.0724638	0.0434783	0.057971	0	0	0	0	0.000197364	0.000160796	8.84259e-05	0.000115288
Polyribonucleotide nucleotidyltransferase 1, mitochondrial OS=Mus musculus OX=10090 GN=Pnpt1 PE=1 SV=1	sp|Q8K1R3|PNPT1_MOUSE	86	0	0	0	0	0	0	4	0	0	0	0	0	0	0	0.0465116	0	0	0	0	0	0	0	9.45952e-05	0
Protein S100-A6 OS=Mus musculus OX=10090 GN=S100a6 PE=1 SV=3	sp|P14069|S10A6_MOUSE	10	3	0	0	0	0	0	2	2	0.3	0	0	0	0	0	0.2	0.2	0.00108847	0	0	0	0	0	0.000406759	0.000397743
28S ribosomal protein S5, mitochondrial OS=Mus musculus OX=10090 GN=Mrps5 PE=1 SV=1	sp|Q99N87|RT05_MOUSE	48	0	3	0	3	0	0	2	3	0	0.0625	0	0.0625	0	0	0.0416667	0.0625	0	0.00016097	0	0.000170521	0	0	8.47415e-05	0.000124295
40S ribosomal protein S5 OS=Mus musculus OX=10090 GN=Rps5 PE=1 SV=3	sp|P97461|RS5_MOUSE	23	0	2	0	0	3	4	3	0	0	0.0869565	0	0	0.130435	0.173913	0.130435	0	0	0.000223958	0	0	0.000355255	0.00038591	0.000265278	0
39S ribosomal protein L41, mitochondrial OS=Mus musculus OX=10090 GN=Mrpl41 PE=1 SV=1	sp|Q9CQN7|RM41_MOUSE	15	2	0	0	0	0	3	3	3	0.133333	0	0	0	0	0.2	0.2	0.2	0.000483763	0	0	0	0	0.000443797	0.000406759	0.000397743
Glutamate dehydrogenase 1, mitochondrial OS=Mus musculus OX=10090 GN=Glud1 PE=1 SV=1	sp|P26443|DHE3_MOUSE	61	0	0	3	2	3	2	3	2	0	0	0.0491803	0.0327869	0.0491803	0.0327869	0.0491803	0.0327869	0	0	0.000118373	8.94536e-05	0.000133949	7.27536e-05	0.000100023	6.52038e-05
Malonyl-CoA decarboxylase, mitochondrial OS=Mus musculus OX=10090 GN=Mlycd PE=1 SV=1	sp|Q99J39|DCMC_MOUSE	55	0	0	0	0	0	0	3	0	0	0	0	0	0	0	0.0545455	0	0	0	0	0	0	0	0.000110934	0
Proteasome subunit alpha type-1 OS=Mus musculus OX=10090 GN=Psma1 PE=1 SV=1	sp|Q9R1P4|PSA1_MOUSE	30	0	2	0	0	3	0	0	4	0	0.0666667	0	0	0.1	0	0	0.133333	0	0.000171701	0	0	0.000272362	0	0	0.000265162
Reticulon-2 OS=Mus musculus OX=10090 GN=Rtn2 PE=1 SV=1	sp|O70622|RTN2_MOUSE	51	0	0	0	0	0	4	5	2	0	0	0	0	0	0.0784314	0.0980392	0.0392157	0	0	0	0	0	0.000174038	0.000199392	7.79889e-05
Probable ATP-dependent RNA helicase DDX5 OS=Mus musculus OX=10090 GN=Ddx5 PE=1 SV=2	sp|Q61656|DDX5_MOUSE	69	0	0	0	0	0	0	0	2	0	0	0	0	0	0	0	0.0289855	0	0	0	0	0	0	0	5.7644e-05
28S ribosomal protein S27, mitochondrial OS=Mus musculus OX=10090 GN=Mrps27 PE=1 SV=2	sp|Q8BK72|RT27_MOUSE	48	0	0	2	3	0	3	5	3	0	0	0.0416667	0.0625	0	0.0625	0.104167	0.0625	0	0	0.000100288	0.000170521	0	0.000138687	0.000211854	0.000124295
Ig kappa chain V-II region VKappa167 OS=Mus musculus OX=10090 GN=Gm5153 PE=4 SV=1	sp|P01627|KV2A2_MOUSE	13	2	3	3	0	0	3	3	4	0.153846	0.230769	0.230769	0	0	0.230769	0.230769	0.307692	0.000558188	0.000594349	0.000555441	0	0	0.000512074	0.000469338	0.000611913
Dynamin-1-like protein OS=Mus musculus OX=10090 GN=Dnm1l PE=1 SV=2	sp|Q8K1M6|DNM1L_MOUSE	83	0	2	0	0	3	0	4	5	0	0.0240964	0	0	0.0361446	0	0.0481928	0.060241	0	6.20606e-05	0	0	9.84442e-05	0	9.80143e-05	0.000119802
Dysferlin OS=Mus musculus OX=10090 GN=Dysf PE=1 SV=3	sp|Q9ESD7|DYSF_MOUSE	238	0	0	2	0	0	0	6	4	0	0	0.00840336	0	0	0	0.0252101	0.0168067	0	0	2.02261e-05	0	0	0	5.12722e-05	3.34238e-05
Maleylacetoacetate isomerase OS=Mus musculus OX=10090 GN=Gstz1 PE=1 SV=1	sp|Q9WVL0|MAAI_MOUSE	24	0	0	0	0	0	0	0	5	0	0	0	0	0	0	0	0.208333	0	0	0	0	0	0	0	0.000414316
Inosine-5'-monophosphate dehydrogenase 2 OS=Mus musculus OX=10090 GN=Impdh2 PE=1 SV=2	sp|P24547|IMDH2_MOUSE	56	0	0	0	0	2	6	4	6	0	0	0	0	0.0357143	0.107143	0.0714286	0.107143	0	0	0	0	9.72723e-05	0.000237748	0.000145271	0.000213077
60S ribosomal protein L19 OS=Mus musculus OX=10090 GN=Rpl19 PE=1 SV=1	sp|P84099|RL19_MOUSE	23	0	2	2	2	0	0	2	2	0	0.0869565	0.0869565	0.0869565	0	0	0.0869565	0.0869565	0	0.000223958	0.000209297	0.000237246	0	0	0.000176852	0.000172932
Acyl-protein thioesterase 1 OS=Mus musculus OX=10090 GN=Lypla1 PE=1 SV=1	sp|P97823|LYPA1_MOUSE	25	2	2	0	0	3	2	2	0	0.08	0.08	0	0	0.12	0.08	0.08	0	0.000290258	0.000206041	0	0	0.000326835	0.000177519	0.000162704	0
Fumarylacetoacetate hydrolase domain-containing protein 2A OS=Mus musculus OX=10090 GN=Fahd2 PE=1 SV=1	sp|Q3TC72|FAHD2_MOUSE	35	0	3	0	0	0	3	2	0	0	0.0857143	0	0	0	0.0857143	0.0571429	0	0	0.000220758	0	0	0	0.000190199	0.000116217	0
Ankyrin-1 OS=Mus musculus OX=10090 GN=Ank1 PE=1 SV=2	sp|Q02357|ANK1_MOUSE	204	0	3	0	0	0	0	0	4	0	0.0147059	0	0	0	0	0	0.0196078	0	3.78752e-05	0	0	0	0	0	3.89944e-05
60S ribosomal protein L18 OS=Mus musculus OX=10090 GN=Rpl18 PE=1 SV=3	sp|P35980|RL18_MOUSE	22	0	0	2	0	0	0	5	2	0	0	0.0909091	0	0	0	0.227273	0.0909091	0	0	0.00021881	0	0	0	0.000462227	0.000180792
Adenosylhomocysteinase OS=Mus musculus OX=10090 GN=Ahcy PE=1 SV=3	sp|P50247|SAHH_MOUSE	48	0	0	0	3	3	0	0	0	0	0	0	0.0625	0.0625	0	0	0	0	0	0	0.000170521	0.000170226	0	0	0
28S ribosomal protein S18a, mitochondrial OS=Mus musculus OX=10090 GN=Mrps18a PE=2 SV=1	sp|Q99N85|RT18A_MOUSE	22	0	0	0	0	3	0	0	0	0	0	0	0	0.136364	0	0	0	0	0	0	0	0.000371403	0	0	0
28S ribosomal protein S26, mitochondrial OS=Mus musculus OX=10090 GN=Mrps26 PE=1 SV=1	sp|Q80ZS3|RT26_MOUSE	23	0	0	3	0	0	0	5	4	0	0	0.130435	0	0	0	0.217391	0.173913	0	0	0.000313945	0	0	0	0.00044213	0.000345864
cAMP-dependent protein kinase catalytic subunit alpha OS=Mus musculus OX=10090 GN=Prkaca PE=1 SV=3	sp|P05132|KAPCA_MOUSE	41	0	0	0	0	2	3	3	4	0	0	0	0	0.0487805	0.0731707	0.0731707	0.097561	0	0	0	0	0.00013286	0.000162365	0.000148814	0.000194021
Transmembrane protein 70, mitochondrial OS=Mus musculus OX=10090 GN=Tmem70 PE=2 SV=2	sp|Q921N7|TMM70_MOUSE	28	0	0	0	0	0	3	0	3	0	0	0	0	0	0.107143	0	0.107143	0	0	0	0	0	0.000237748	0	0.000213077
Ubiquinone biosynthesis O-methyltransferase, mitochondrial OS=Mus musculus OX=10090 GN=Coq3 PE=1 SV=1	sp|Q8BMS4|COQ3_MOUSE	41	0	0	0	0	0	2	4	0	0	0	0	0	0	0.0487805	0.097561	0	0	0	0	0	0	0.000108243	0.000198419	0
Mitochondrial carrier homolog 2 OS=Mus musculus OX=10090 GN=Mtch2 PE=1 SV=1	sp|Q791V5|MTCH2_MOUSE	33	0	0	3	0	3	0	3	4	0	0	0.0909091	0	0.0909091	0	0.0909091	0.121212	0	0	0.00021881	0	0.000247602	0	0.000184891	0.000241057
Dynactin subunit 3 OS=Mus musculus OX=10090 GN=Dctn3 PE=1 SV=2	sp|Q9Z0Y1|DCTN3_MOUSE	21	0	3	0	0	3	4	2	4	0	0.142857	0	0	0.142857	0.190476	0.0952381	0.190476	0	0.000367931	0	0	0.000389089	0.000422664	0.000193695	0.000378803
Sulfide:quinone oxidoreductase, mitochondrial OS=Mus musculus OX=10090 GN=Sqor PE=1 SV=3	sp|Q9R112|SQOR_MOUSE	50	0	0	2	2	0	2	7	3	0	0	0.04	0.04	0	0.04	0.14	0.06	0	0	9.62764e-05	0.000109133	0	8.87594e-05	0.000284732	0.000119323
Calpain-2 catalytic subunit OS=Mus musculus OX=10090 GN=Capn2 PE=1 SV=4	sp|O08529|CAN2_MOUSE	80	3	0	0	0	0	5	4	4	0.0375	0	0	0	0	0.0625	0.05	0.05	0.000136058	0	0	0	0	0.000138687	0.00010169	9.94358e-05
Serine beta-lactamase-like protein LACTB, mitochondrial OS=Mus musculus OX=10090 GN=Lactb PE=1 SV=1	sp|Q9EP89|LACTB_MOUSE	61	0	5	0	0	4	0	0	3	0	0.0819672	0	0	0.0655738	0	0	0.0491803	0	0.000211108	0	0	0.000178598	0	0	9.78057e-05
Plasminogen activator inhibitor 1 RNA-binding protein OS=Mus musculus OX=10090 GN=Serbp1 PE=1 SV=2	sp|Q9CY58|PAIRB_MOUSE	45	0	0	0	0	0	0	0	2	0	0	0	0	0	0	0	0.0444444	0	0	0	0	0	0	0	8.83874e-05
60S ribosomal protein L36 OS=Mus musculus OX=10090 GN=Rpl36 PE=1 SV=2	sp|P47964|RL36_MOUSE	12	0	0	0	2	0	2	0	2	0	0	0	0.166667	0	0.166667	0	0.166667	0	0	0	0.000454722	0	0.000369831	0	0.000331453
Ras-related protein R-Ras2 OS=Mus musculus OX=10090 GN=Rras2 PE=1 SV=1	sp|P62071|RRAS2_MOUSE	23	0	2	2	3	0	0	2	0	0	0.0869565	0.0869565	0.130435	0	0	0.0869565	0	0	0.000223958	0.000209297	0.00035587	0	0	0.000176852	0
Bleomycin hydrolase OS=Mus musculus OX=10090 GN=Blmh PE=1 SV=1	sp|Q8R016|BLMH_MOUSE	53	3	0	5	0	2	2	0	0	0.0566038	0	0.0943396	0	0.0377358	0.0377358	0	0	0.000205371	0	0.000227067	0	0.000102778	8.37353e-05	0	0
Cytoplasmic aconitate hydratase OS=Mus musculus OX=10090 GN=Aco1 PE=1 SV=3	sp|P28271|ACOC_MOUSE	98	0	0	6	0	3	0	0	0	0	0	0.0612245	0	0.0306122	0	0	0	0	0	0.000147362	0	8.33762e-05	0	0	0
39S ribosomal protein L21, mitochondrial OS=Mus musculus OX=10090 GN=Mrpl21 PE=1 SV=1	sp|Q9D1N9|RM21_MOUSE	23	0	2	2	0	0	3	3	2	0	0.0869565	0.0869565	0	0	0.130435	0.130435	0.0869565	0	0.000223958	0.000209297	0	0	0.000289433	0.000265278	0.000172932
Glutathione S-transferase kappa 1 OS=Mus musculus OX=10090 GN=Gstk1 PE=1 SV=3	sp|Q9DCM2|GSTK1_MOUSE	26	0	0	0	2	0	3	0	6	0	0	0	0.0769231	0	0.115385	0	0.230769	0	0	0	0.000209872	0	0.000256037	0	0.000458935
39S ribosomal protein L13, mitochondrial OS=Mus musculus OX=10090 GN=Mrpl13 PE=1 SV=1	sp|Q9D1P0|RM13_MOUSE	21	3	4	0	0	3	2	3	2	0.142857	0.190476	0	0	0.142857	0.0952381	0.142857	0.0952381	0.000518318	0.000490574	0	0	0.000389089	0.000211332	0.000290542	0.000189402
Cytochrome c-type heme lyase OS=Mus musculus OX=10090 GN=Hccs PE=1 SV=2	sp|P53702|CCHL_MOUSE	31	4	5	0	0	0	0	2	0	0.129032	0.16129	0	0	0	0	0.0645161	0	0.000468158	0.000415405	0	0	0	0	0.000131213	0
3-hydroxyisobutyryl-CoA hydrolase, mitochondrial OS=Mus musculus OX=10090 GN=Hibch PE=1 SV=1	sp|Q8QZS1|HIBCH_MOUSE	43	0	0	2	0	3	3	3	3	0	0	0.0465116	0	0.0697674	0.0697674	0.0697674	0.0697674	0	0	0.000111949	0	0.00019002	0.000154813	0.000141893	0.000138748
T-complex protein 1 subunit theta OS=Mus musculus OX=10090 GN=Cct8 PE=1 SV=3	sp|P42932|TCPQ_MOUSE	60	0	0	0	0	0	0	0	2	0	0	0	0	0	0	0	0.0333333	0	0	0	0	0	0	0	6.62906e-05
28S ribosomal protein S29, mitochondrial OS=Mus musculus OX=10090 GN=Dap3 PE=1 SV=1	sp|Q9ER88|RT29_MOUSE	45	0	0	0	0	2	0	5	5	0	0	0	0	0.0444444	0	0.111111	0.111111	0	0	0	0	0.00012105	0	0.000225977	0.000220969
Collagen alpha-6(VI) chain OS=Mus musculus OX=10090 GN=Col6a6 PE=1 SV=2	sp|Q8C6K9|CO6A6_MOUSE	246	0	0	0	0	5	0	0	0	0	0	0	0	0.0203252	0	0	0	0	0	0	0	5.53582e-05	0	0	0
Mitofusin-1 OS=Mus musculus OX=10090 GN=Mfn1 PE=1 SV=3	sp|Q811U4|MFN1_MOUSE	84	0	0	0	0	5	2	5	5	0	0	0	0	0.0595238	0.0238095	0.0595238	0.0595238	0	0	0	0	0.00016212	5.2833e-05	0.000121059	0.000118376
Hydroxymethylglutaryl-CoA lyase, mitochondrial OS=Mus musculus OX=10090 GN=Hmgcl PE=1 SV=2	sp|P38060|HMGCL_MOUSE	34	0	0	0	2	0	3	0	0	0	0	0	0.0588235	0	0.0882353	0	0	0	0	0	0.00016049	0	0.000195793	0	0
40S ribosomal protein S24 OS=Mus musculus OX=10090 GN=Rps24 PE=1 SV=1	sp|P62849|RS24_MOUSE	15	0	3	0	0	0	2	0	2	0	0.2	0	0	0	0.133333	0	0.133333	0	0.000515103	0	0	0	0.000295865	0	0.000265162
Microtubule-associated proteins 1A/1B light chain 3A OS=Mus musculus OX=10090 GN=Map1lc3a PE=1 SV=1	sp|Q91VR7|MLP3A_MOUSE	14	0	0	0	0	0	3	2	2	0	0	0	0	0	0.214286	0.142857	0.142857	0	0	0	0	0	0.000475497	0.000290542	0.000284102
60S ribosomal protein L4 OS=Mus musculus OX=10090 GN=Rpl4 PE=1 SV=3	sp|Q9D8E6|RL4_MOUSE	47	0	0	3	0	0	0	3	3	0	0	0.0638298	0	0	0	0.0638298	0.0638298	0	0	0.000153633	0	0	0	0.000129817	0.000126939
Triadin OS=Mus musculus OX=10090 GN=Trdn PE=1 SV=1	sp|E9Q9K5|TRDN_MOUSE	78	0	2	0	0	2	0	3	3	0	0.025641	0	0	0.025641	0	0.0384615	0.0384615	0	6.60388e-05	0	0	6.98365e-05	0	7.8223e-05	7.64891e-05
Carbonic anhydrase 2 OS=Mus musculus OX=10090 GN=Ca2 PE=1 SV=4	sp|P00920|CAH2_MOUSE	29	0	0	3	2	0	0	3	4	0	0	0.103448	0.0689655	0	0	0.103448	0.137931	0	0	0.000248991	0.000188161	0	0	0.000210393	0.000274306
Alcohol dehydrogenase class-3 OS=Mus musculus OX=10090 GN=Adh5 PE=1 SV=3	sp|P28474|ADHX_MOUSE	40	0	0	0	0	0	0	3	4	0	0	0	0	0	0	0.075	0.1	0	0	0	0	0	0	0.000152535	0.000198872
RNA-binding protein FUS OS=Mus musculus OX=10090 GN=Fus PE=1 SV=1	sp|P56959|FUS_MOUSE	53	0	0	0	0	0	0	3	2	0	0	0	0	0	0	0.0566038	0.0377358	0	0	0	0	0	0	0.000115121	7.50459e-05
Ras-interacting protein 1 OS=Mus musculus OX=10090 GN=Rasip1 PE=1 SV=3	sp|Q3U0S6|RAIN_MOUSE	104	0	0	4	0	0	0	0	0	0	0	0.0384615	0	0	0	0	0	0	0	9.25735e-05	0	0	0	0	0
Catenin alpha-1 OS=Mus musculus OX=10090 GN=Ctnna1 PE=1 SV=1	sp|P26231|CTNA1_MOUSE	100	0	0	0	0	3	3	2	4	0	0	0	0	0.03	0.03	0.02	0.04	0	0	0	0	8.17087e-05	6.65696e-05	4.06759e-05	7.95487e-05
F-box only protein 40 OS=Mus musculus OX=10090 GN=Fbxo40 PE=1 SV=1	sp|P62932|FBX40_MOUSE	80	0	4	0	0	5	0	0	4	0	0.05	0	0	0.0625	0	0	0.05	0	0.000128776	0	0	0.000170226	0	0	9.94358e-05
Vacuolar protein sorting-associated protein 29 OS=Mus musculus OX=10090 GN=Vps29 PE=1 SV=1	sp|Q9QZ88|VPS29_MOUSE	20	0	0	0	0	0	4	3	3	0	0	0	0	0	0.2	0.15	0.15	0	0	0	0	0	0.000443797	0.00030507	0.000298308
Lamin-B1 OS=Mus musculus OX=10090 GN=Lmnb1 PE=1 SV=3	sp|P14733|LMNB1_MOUSE	67	0	0	0	0	6	0	0	3	0	0	0	0	0.0895522	0	0	0.0447761	0	0	0	0	0.000243907	0	0	8.9047e-05
Heterogeneous nuclear ribonucleoproteins A2/B1 OS=Mus musculus OX=10090 GN=Hnrnpa2b1 PE=1 SV=2	sp|O88569|ROA2_MOUSE	37	0	0	0	0	0	0	0	15	0	0	0	0	0	0	0	0.405405	0	0	0	0	0	0	0	0.000806237
Proteasome subunit alpha type-6 OS=Mus musculus OX=10090 GN=Psma6 PE=1 SV=1	sp|Q9QUM9|PSA6_MOUSE	27	0	0	0	0	0	0	0	2	0	0	0	0	0	0	0	0.0740741	0	0	0	0	0	0	0	0.000147312
Ubiquitin-conjugating enzyme E2 variant 2 OS=Mus musculus OX=10090 GN=Ube2v2 PE=1 SV=4	sp|Q9D2M8|UB2V2_MOUSE	16	0	2	0	0	0	0	2	2	0	0.125	0	0	0	0	0.125	0.125	0	0.000321939	0	0	0	0	0.000254225	0.00024859
ADP-ribosylation factor-like protein 8B OS=Mus musculus OX=10090 GN=Arl8b PE=1 SV=1	sp|Q9CQW2|ARL8B_MOUSE	22	2	2	0	0	0	2	2	2	0.0909091	0.0909091	0	0	0	0.0909091	0.0909091	0.0909091	0.000329839	0.000234138	0	0	0	0.000201726	0.000184891	0.000180792
Dihydropyrimidinase-related protein 2 OS=Mus musculus OX=10090 GN=Dpysl2 PE=1 SV=2	sp|O08553|DPYL2_MOUSE	62	4	2	2	0	0	0	2	2	0.0645161	0.0322581	0.0322581	0	0	0	0.0322581	0.0322581	0.000234079	8.30811e-05	7.76423e-05	0	0	0	6.56063e-05	6.41522e-05
Pentatricopeptide repeat domain-containing protein 3, mitochondrial OS=Mus musculus OX=10090 GN=Ptcd3 PE=1 SV=2	sp|Q14C51|PTCD3_MOUSE	78	0	0	0	0	3	0	0	2	0	0	0	0	0.0384615	0	0	0.025641	0	0	0	0	0.000104755	0	0	5.09927e-05
NADH dehydrogenase [ubiquinone] 1 beta subcomplex subunit 8, mitochondrial OS=Mus musculus OX=10090 GN=Ndufb8 PE=1 SV=1	sp|Q9D6J5|NDUB8_MOUSE	22	0	0	0	0	0	4	4	0	0	0	0	0	0	0.181818	0.181818	0	0	0	0	0	0	0.000403452	0.000369781	0
3-ketoacyl-CoA thiolase A, peroxisomal OS=Mus musculus OX=10090 GN=Acaa1a PE=1 SV=1	sp|Q921H8|THIKA_MOUSE	44	0	0	0	0	3	0	0	3	0	0	0	0	0.0681818	0	0	0.0681818	0	0	0	0	0.000185702	0	0	0.000135594
Ig kappa chain V-II region 17S29.1 OS=Mus musculus OX=10090 PE=1 SV=1	sp|P03976|KV2A5_MOUSE	12	0	2	0	0	0	0	0	0	0	0.166667	0	0	0	0	0	0	0	0.000429252	0	0	0	0	0	0
Cysteine and glycine-rich protein 1 OS=Mus musculus OX=10090 GN=Csrp1 PE=1 SV=3	sp|P97315|CSRP1_MOUSE	21	0	0	0	0	0	2	0	3	0	0	0	0	0	0.0952381	0	0.142857	0	0	0	0	0	0.000211332	0	0.000284102
Low molecular weight phosphotyrosine protein phosphatase OS=Mus musculus OX=10090 GN=Acp1 PE=1 SV=3	sp|Q9D358|PPAC_MOUSE	18	0	2	0	0	0	2	2	0	0	0.111111	0	0	0	0.111111	0.111111	0	0	0.000286168	0	0	0	0.000246554	0.000225977	0
28S ribosomal protein S34, mitochondrial OS=Mus musculus OX=10090 GN=Mrps34 PE=1 SV=1	sp|Q9JIK9|RT34_MOUSE	26	0	2	0	0	0	2	4	0	0	0.0769231	0	0	0	0.0769231	0.153846	0	0	0.000198116	0	0	0	0.000170691	0.000312892	0
MICOS complex subunit Mic26 OS=Mus musculus OX=10090 GN=Apoo PE=1 SV=2	sp|Q9DCZ4|MIC26_MOUSE	23	0	0	0	0	2	3	2	2	0	0	0	0	0.0869565	0.130435	0.0869565	0.0869565	0	0	0	0	0.000236837	0.000289433	0.000176852	0.000172932
Four and a half LIM domains protein 2 OS=Mus musculus OX=10090 GN=Fhl2 PE=1 SV=1	sp|O70433|FHL2_MOUSE	32	0	0	3	0	0	0	0	0	0	0	0.09375	0	0	0	0	0	0	0	0.000225648	0	0	0	0	0
LIM and SH3 domain protein 1 OS=Mus musculus OX=10090 GN=Lasp1 PE=1 SV=1	sp|Q61792|LASP1_MOUSE	30	0	0	0	0	0	0	3	3	0	0	0	0	0	0	0.1	0.1	0	0	0	0	0	0	0.00020338	0.000198872
ATP-dependent RNA helicase A OS=Mus musculus OX=10090 GN=Dhx9 PE=1 SV=2	sp|O70133|DHX9_MOUSE	149	0	0	0	0	0	0	0	2	0	0	0	0	0	0	0	0.0134228	0	0	0	0	0	0	0	2.66942e-05
Complement C1q subcomponent subunit C OS=Mus musculus OX=10090 GN=C1qc PE=1 SV=2	sp|Q02105|C1QC_MOUSE	26	0	3	0	0	0	0	0	4	0	0.115385	0	0	0	0	0	0.153846	0	0.000297175	0	0	0	0	0	0.000305956
60S ribosomal protein L27a OS=Mus musculus OX=10090 GN=Rpl27a PE=1 SV=5	sp|P14115|RL27A_MOUSE	17	0	0	0	0	0	2	2	2	0	0	0	0	0	0.117647	0.117647	0.117647	0	0	0	0	0	0.000261057	0.00023927	0.000233967
Eukaryotic translation initiation factor 5A-1 OS=Mus musculus OX=10090 GN=Eif5a PE=1 SV=2	sp|P63242|IF5A1_MOUSE	17	0	0	0	0	0	3	0	6	0	0	0	0	0	0.176471	0	0.352941	0	0	0	0	0	0.000391586	0	0.0007019
Peptidyl-prolyl cis-trans isomerase A OS=Mus musculus OX=10090 GN=Ppia PE=1 SV=2	sp|P17742|PPIA_MOUSE	18	0	0	0	0	0	0	0	4	0	0	0	0	0	0	0	0.222222	0	0	0	0	0	0	0	0.000441937
Aspartyl/asparaginyl beta-hydroxylase OS=Mus musculus OX=10090 GN=Asph PE=1 SV=1	sp|Q8BSY0|ASPH_MOUSE	83	0	0	0	0	0	0	0	3	0	0	0	0	0	0	0	0.0361446	0	0	0	0	0	0	0	7.18813e-05
40S ribosomal protein S30 OS=Mus musculus OX=10090 GN=Fau PE=1 SV=1	sp|P62862|RS30_MOUSE	7	0	0	0	0	0	2	0	0	0	0	0	0	0	0.285714	0	0	0	0	0	0	0	0.000633996	0	0
Splicing factor, proline- and glutamine-rich OS=Mus musculus OX=10090 GN=Sfpq PE=1 SV=1	sp|Q8VIJ6|SFPQ_MOUSE	75	0	0	2	0	0	0	2	0	0	0	0.0266667	0	0	0	0.0266667	0	0	0	6.41843e-05	0	0	0	5.42346e-05	0
40S ribosomal protein S28 OS=Mus musculus OX=10090 GN=Rps28 PE=1 SV=1	sp|P62858|RS28_MOUSE	8	0	0	0	2	0	0	3	3	0	0	0	0.25	0	0	0.375	0.375	0	0	0	0.000682083	0	0	0.000762674	0.000745769
40S ribosomal protein S27 OS=Mus musculus OX=10090 GN=Rps27 PE=1 SV=3	sp|Q6ZWU9|RS27_MOUSE	9	0	0	0	2	0	2	3	2	0	0	0	0.222222	0	0.222222	0.333333	0.222222	0	0	0	0.000606296	0	0.000493108	0.000677932	0.000441937
10 kDa heat shock protein, mitochondrial OS=Mus musculus OX=10090 GN=Hspe1 PE=1 SV=2	sp|Q64433|CH10_MOUSE	11	0	2	0	0	2	2	3	3	0	0.181818	0	0	0.181818	0.181818	0.272727	0.272727	0	0.000468275	0	0	0.000495204	0.000403452	0.000554672	0.000542377
DNA damage-binding protein 1 OS=Mus musculus OX=10090 GN=Ddb1 PE=1 SV=2	sp|Q3U1J4|DDB1_MOUSE	127	0	0	0	0	0	0	3	2	0	0	0	0	0	0	0.023622	0.015748	0	0	0	0	0	0	4.80424e-05	3.13184e-05
Protein FAM162A OS=Mus musculus OX=10090 GN=Fam162a PE=1 SV=1	sp|Q9D6U8|F162A_MOUSE	18	0	0	0	0	0	2	2	4	0	0	0	0	0	0.111111	0.111111	0.222222	0	0	0	0	0	0.000246554	0.000225977	0.000441937
Aspartate--tRNA ligase, cytoplasmic OS=Mus musculus OX=10090 GN=Dars1 PE=1 SV=2	sp|Q922B2|SYDC_MOUSE	57	0	0	2	0	0	0	3	4	0	0	0.0350877	0	0	0	0.0526316	0.0701754	0	0	8.4453e-05	0	0	0	0.000107042	0.000139559
Cytochrome c oxidase assembly protein COX20, mitochondrial OS=Mus musculus OX=10090 GN=Cox20 PE=1 SV=1	sp|Q9D7J4|COX20_MOUSE	13	0	2	0	0	0	0	4	3	0	0.153846	0	0	0	0	0.307692	0.230769	0	0.000396233	0	0	0	0	0.000625784	0.000458935
Peroxisomal acyl-coenzyme A oxidase 1 OS=Mus musculus OX=10090 GN=Acox1 PE=1 SV=5	sp|Q9R0H0|ACOX1_MOUSE	75	0	0	0	0	2	2	3	2	0	0	0	0	0.0266667	0.0266667	0.04	0.0266667	0	0	0	0	7.263e-05	5.91729e-05	8.13519e-05	5.30325e-05
Band 3 anion transport protein OS=Mus musculus OX=10090 GN=Slc4a1 PE=1 SV=1	sp|P04919|B3AT_MOUSE	103	0	0	0	0	0	0	2	2	0	0	0	0	0	0	0.0194175	0.0194175	0	0	0	0	0	0	3.94912e-05	3.86159e-05
Oxidoreductase NAD-binding domain-containing protein 1 OS=Mus musculus OX=10090 GN=Oxnad1 PE=1 SV=2	sp|Q8VE38|OXND1_MOUSE	35	0	0	2	0	0	0	0	3	0	0	0.0571429	0	0	0	0	0.0857143	0	0	0.000137538	0	0	0	0	0.000170461
Ras-related protein Rab-35 OS=Mus musculus OX=10090 GN=Rab35 PE=1 SV=1	sp|Q6PHN9|RAB35_MOUSE	23	0	0	0	0	0	0	0	2	0	0	0	0	0	0	0	0.0869565	0	0	0	0	0	0	0	0.000172932
Nicotinamide phosphoribosyltransferase OS=Mus musculus OX=10090 GN=Nampt PE=1 SV=1	sp|Q99KQ4|NAMPT_MOUSE	55	0	0	0	0	2	3	0	2	0	0	0	0	0.0363636	0.0545455	0	0.0363636	0	0	0	0	9.90409e-05	0.000121036	0	7.2317e-05
Ubiquitin-conjugating enzyme E2 N OS=Mus musculus OX=10090 GN=Ube2n PE=1 SV=1	sp|P61089|UBE2N_MOUSE	17	0	2	0	2	0	0	0	0	0	0.117647	0	0.117647	0	0	0	0	0	0.000303002	0	0.00032098	0	0	0	0
Bcl-2-like protein 13 OS=Mus musculus OX=10090 GN=Bcl2l13 PE=1 SV=2	sp|P59017|B2L13_MOUSE	47	0	2	0	0	2	0	4	0	0	0.0425532	0	0	0.0425532	0	0.0851064	0	0	0.000109596	0	0	0.000115899	0	0.000173089	0
Sodium/calcium exchanger 1 OS=Mus musculus OX=10090 GN=Slc8a1 PE=1 SV=1	sp|P70414|NAC1_MOUSE	108	0	0	2	0	0	0	2	0	0	0	0.0185185	0	0	0	0.0185185	0	0	0	4.45724e-05	0	0	0	3.76629e-05	0
39S ribosomal protein L9, mitochondrial OS=Mus musculus OX=10090 GN=Mrpl9 PE=1 SV=2	sp|Q99N94|RM09_MOUSE	30	2	0	0	0	2	0	0	0	0.0666667	0	0	0	0.0666667	0	0	0	0.000241882	0	0	0	0.000181575	0	0	0
Methylglutaconyl-CoA hydratase, mitochondrial OS=Mus musculus OX=10090 GN=Auh PE=1 SV=1	sp|Q9JLZ3|AUHM_MOUSE	33	0	0	0	0	0	2	2	0	0	0	0	0	0	0.0606061	0.0606061	0	0	0	0	0	0	0.000134484	0.00012326	0
Laminin subunit alpha-5 OS=Mus musculus OX=10090 GN=Lama5 PE=1 SV=4	sp|Q61001|LAMA5_MOUSE	404	0	0	0	0	3	0	0	0	0	0	0	0	0.00742574	0	0	0	0	0	0	0	2.02249e-05	0	0	0
Adenylosuccinate lyase OS=Mus musculus OX=10090 GN=Adsl PE=1 SV=2	sp|P54822|PUR8_MOUSE	55	0	0	0	0	2	0	2	0	0	0	0	0	0.0363636	0	0.0363636	0	0	0	0	0	9.90409e-05	0	7.39562e-05	0
Tropomodulin-3 OS=Mus musculus OX=10090 GN=Tmod3 PE=1 SV=1	sp|Q9JHJ0|TMOD3_MOUSE	40	0	3	0	0	5	0	0	2	0	0.075	0	0	0.125	0	0	0.05	0	0.000193164	0	0	0.000340453	0	0	9.94358e-05
39S ribosomal protein L33, mitochondrial OS=Mus musculus OX=10090 GN=Mrpl33 PE=1 SV=1	sp|Q9CQP0|RM33_MOUSE	7	0	0	0	3	0	0	0	0	0	0	0	0.428571	0	0	0	0	0	0	0	0.00116929	0	0	0	0
T-complex protein 1 subunit zeta OS=Mus musculus OX=10090 GN=Cct6a PE=1 SV=3	sp|P80317|TCPZ_MOUSE	58	0	0	0	0	0	0	0	5	0	0	0	0	0	0	0	0.0862069	0	0	0	0	0	0	0	0.000171441
Amine oxidase [flavin-containing] B OS=Mus musculus OX=10090 GN=Maob PE=1 SV=4	sp|Q8BW75|AOFB_MOUSE	59	0	0	0	0	0	0	3	3	0	0	0	0	0	0	0.0508475	0.0508475	0	0	0	0	0	0	0.000103413	0.000101121
39S ribosomal protein L43, mitochondrial OS=Mus musculus OX=10090 GN=Mrpl43 PE=1 SV=1	sp|Q99N89|RM43_MOUSE	20	0	3	0	0	0	0	0	0	0	0.15	0	0	0	0	0	0	0	0.000386327	0	0	0	0	0	0
Isoaspartyl peptidase/L-asparaginase OS=Mus musculus OX=10090 GN=Asrgl1 PE=1 SV=1	sp|Q8C0M9|ASGL1_MOUSE	34	0	0	3	0	0	0	0	2	0	0	0.0882353	0	0	0	0	0.0588235	0	0	0.000212374	0	0	0	0	0.000116983
Multifunctional protein ADE2 OS=Mus musculus OX=10090 GN=Paics PE=1 SV=4	sp|Q9DCL9|PUR6_MOUSE	47	0	0	0	3	0	0	0	5	0	0	0	0.0638298	0	0	0	0.106383	0	0	0	0.000174149	0	0	0	0.000211566
Heterogeneous nuclear ribonucleoprotein A3 OS=Mus musculus OX=10090 GN=Hnrnpa3 PE=1 SV=1	sp|Q8BG05|ROA3_MOUSE	40	0	0	0	0	0	0	0	4	0	0	0	0	0	0	0	0.1	0	0	0	0	0	0	0	0.000198872
Plastin-2 OS=Mus musculus OX=10090 GN=Lcp1 PE=1 SV=4	sp|Q61233|PLSL_MOUSE	70	0	0	0	0	0	0	0	11	0	0	0	0	0	0	0	0.157143	0	0	0	0	0	0	0	0.000312513
Serine protease HTRA2, mitochondrial OS=Mus musculus OX=10090 GN=Htra2 PE=1 SV=2	sp|Q9JIY5|HTRA2_MOUSE	49	0	0	2	0	0	0	0	2	0	0	0.0408163	0	0	0	0	0.0408163	0	0	9.82413e-05	0	0	0	0	8.11721e-05
Immunoglobulin J chain OS=Mus musculus OX=10090 GN=Jchain PE=1 SV=4	sp|P01592|IGJ_MOUSE	18	0	0	2	2	0	0	0	3	0	0	0.111111	0.111111	0	0	0	0.166667	0	0	0.000267435	0.000303148	0	0	0	0.000331453
Dual specificity protein phosphatase 3 OS=Mus musculus OX=10090 GN=Dusp3 PE=1 SV=1	sp|Q9D7X3|DUS3_MOUSE	20	0	0	0	0	0	0	0	2	0	0	0	0	0	0	0	0.1	0	0	0	0	0	0	0	0.000198872
Inorganic pyrophosphatase 2, mitochondrial OS=Mus musculus OX=10090 GN=Ppa2 PE=1 SV=1	sp|Q91VM9|IPYR2_MOUSE	38	0	0	0	0	0	0	3	2	0	0	0	0	0	0	0.0789474	0.0526316	0	0	0	0	0	0	0.000160563	0.000104669
Fragile X mental retardation syndrome-related protein 1 OS=Mus musculus OX=10090 GN=Fxr1 PE=1 SV=2	sp|Q61584|FXR1_MOUSE	76	0	0	0	0	2	0	0	0	0	0	0	0	0.0263158	0	0	0	0	0	0	0	7.16743e-05	0	0	0
Superoxide dismutase [Cu-Zn] OS=Mus musculus OX=10090 GN=Sod1 PE=1 SV=2	sp|P08228|SODC_MOUSE	16	0	2	0	0	0	0	0	0	0	0.125	0	0	0	0	0	0	0	0.000321939	0	0	0	0	0	0
Methyl-CpG-binding protein 2 OS=Mus musculus OX=10090 GN=Mecp2 PE=1 SV=1	sp|Q9Z2D6|MECP2_MOUSE	52	0	0	0	2	0	0	0	3	0	0	0	0.0384615	0	0	0	0.0576923	0	0	0	0.000104936	0	0	0	0.000114734
Transmembrane protein 143 OS=Mus musculus OX=10090 GN=Tmem143 PE=1 SV=1	sp|Q8VD26|TM143_MOUSE	52	0	0	0	0	0	0	2	0	0	0	0	0	0	0	0.0384615	0	0	0	0	0	0	0	7.8223e-05	0
28S ribosomal protein S35, mitochondrial OS=Mus musculus OX=10090 GN=Mrps35 PE=1 SV=2	sp|Q8BJZ4|RT35_MOUSE	36	0	0	0	0	0	0	2	0	0	0	0	0	0	0	0.0555556	0	0	0	0	0	0	0	0.000112989	0
NADH dehydrogenase [ubiquinone] 1 alpha subcomplex assembly factor 4 OS=Mus musculus OX=10090 GN=Ndufaf4 PE=1 SV=1	sp|Q9D1H6|NDUF4_MOUSE	20	0	0	0	0	4	0	2	0	0	0	0	0	0.2	0	0.1	0	0	0	0	0	0.000544725	0	0.00020338	0
Protein flightless-1 homolog OS=Mus musculus OX=10090 GN=Flii PE=1 SV=1	sp|Q9JJ28|FLII_MOUSE	145	0	0	0	0	0	0	0	3	0	0	0	0	0	0	0	0.0206897	0	0	0	0	0	0	0	4.11459e-05
von Willebrand factor OS=Mus musculus OX=10090 GN=Vwf PE=1 SV=2	sp|Q8CIZ8|VWF_MOUSE	309	0	4	0	0	4	0	0	3	0	0.012945	0	0	0.012945	0	0	0.00970874	0	3.334e-05	0	0	3.52573e-05	0	0	1.93079e-05
Actin-related protein 2/3 complex subunit 3 OS=Mus musculus OX=10090 GN=Arpc3 PE=1 SV=3	sp|Q9JM76|ARPC3_MOUSE	21	0	0	0	0	0	0	0	2	0	0	0	0	0	0	0	0.0952381	0	0	0	0	0	0	0	0.000189402
Calmodulin-1 OS=Mus musculus OX=10090 GN=Calm1 PE=1 SV=1	sp|P0DP26|CALM1_MOUSE (+2)	17	2	0	0	0	0	0	0	5	0.117647	0	0	0	0	0	0	0.294118	0.00042685	0	0	0	0	0	0	0.000584917
Complement C1q subcomponent subunit A OS=Mus musculus OX=10090 GN=C1qa PE=1 SV=2	sp|P98086|C1QA_MOUSE	26	0	3	0	0	0	0	0	0	0	0.115385	0	0	0	0	0	0	0	0.000297175	0	0	0	0	0	0
40S ribosomal protein S12 OS=Mus musculus OX=10090 GN=Rps12 PE=1 SV=2	sp|P63323|RS12_MOUSE	15	0	0	0	0	0	0	2	0	0	0	0	0	0	0	0.133333	0	0	0	0	0	0	0	0.000271173	0
60S ribosomal protein L38 OS=Mus musculus OX=10090 GN=Rpl38 PE=1 SV=3	sp|Q9JJI8|RL38_MOUSE	8	0	0	2	0	0	0	2	0	0	0	0.25	0	0	0	0.25	0	0	0	0.000601728	0	0	0	0.000508449	0
Signal recognition particle 9 kDa protein OS=Mus musculus OX=10090 GN=Srp9 PE=1 SV=2	sp|P49962|SRP09_MOUSE	10	0	0	0	0	2	0	0	0	0	0	0	0	0.2	0	0	0	0	0	0	0	0.000544725	0	0	0
Guanine nucleotide-binding protein G(I)/G(S)/G(O) subunit gamma-12 OS=Mus musculus OX=10090 GN=Gng12 PE=1 SV=3	sp|Q9DAS9|GBG12_MOUSE	8	0	0	0	0	0	2	2	0	0	0	0	0	0	0.25	0.25	0	0	0	0	0	0	0.000554746	0.000508449	0
39S ribosomal protein L2, mitochondrial OS=Mus musculus OX=10090 GN=Mrpl2 PE=1 SV=1	sp|Q9D773|RM02_MOUSE	33	0	0	0	2	0	0	0	0	0	0	0	0.0606061	0	0	0	0	0	0	0	0.000165354	0	0	0	0
MICOS complex subunit Mic27 OS=Mus musculus OX=10090 GN=Apool PE=1 SV=1	sp|Q78IK4|MIC27_MOUSE	29	0	0	0	0	0	0	0	3	0	0	0	0	0	0	0	0.103448	0	0	0	0	0	0	0	0.000205729
Acyl-coenzyme A thioesterase 9, mitochondrial OS=Mus musculus OX=10090 GN=Acot9 PE=1 SV=1	sp|Q9R0X4|ACOT9_MOUSE	51	0	0	0	0	0	0	2	2	0	0	0	0	0	0	0.0392157	0.0392157	0	0	0	0	0	0	7.97567e-05	7.79889e-05
NLR family member X1 OS=Mus musculus OX=10090 GN=Nlrx1 PE=1 SV=1	sp|Q3TL44|NLRX1_MOUSE	108	0	0	2	0	2	0	0	0	0	0	0.0185185	0	0.0185185	0	0	0	0	0	4.45724e-05	0	5.04375e-05	0	0	0
C-1-tetrahydrofolate synthase, cytoplasmic OS=Mus musculus OX=10090 GN=Mthfd1 PE=1 SV=4	sp|Q922D8|C1TC_MOUSE	101	0	0	2	0	3	0	0	0	0	0	0.019802	0	0.029703	0	0	0	0	0	4.76616e-05	0	8.08997e-05	0	0	0
Nuclear mitotic apparatus protein 1 OS=Mus musculus OX=10090 GN=Numa1 PE=1 SV=1	sp|E9Q7G0|NUMA1_MOUSE	236	0	0	0	0	2	0	0	0	0	0	0	0	0.00847458	0	0	0	0	0	0	0	2.30816e-05	0	0	0
Serine/arginine-rich splicing factor 1 OS=Mus musculus OX=10090 GN=Srsf1 PE=1 SV=3	sp|Q6PDM2|SRSF1_MOUSE	28	0	0	0	0	0	0	0	5	0	0	0	0	0	0	0	0.178571	0	0	0	0	0	0	0	0.000355128
39S ribosomal protein L46, mitochondrial OS=Mus musculus OX=10090 GN=Mrpl46 PE=1 SV=1	sp|Q9EQI8|RM46_MOUSE	32	0	0	0	2	0	0	0	0	0	0	0	0.0625	0	0	0	0	0	0	0	0.000170521	0	0	0	0
Cysteine and histidine-rich domain-containing protein 1 OS=Mus musculus OX=10090 GN=Chordc1 PE=1 SV=1	sp|Q9D1P4|CHRD1_MOUSE	37	0	0	0	0	0	0	3	2	0	0	0	0	0	0	0.0810811	0.0540541	0	0	0	0	0	0	0.000164902	0.000107498
Probable leucine--tRNA ligase, mitochondrial OS=Mus musculus OX=10090 GN=Lars2 PE=1 SV=1	sp|Q8VDC0|SYLM_MOUSE	101	0	0	0	0	0	0	0	3	0	0	0	0	0	0	0	0.029703	0	0	0	0	0	0	0	5.90708e-05
SWI/SNF complex subunit SMARCC2 OS=Mus musculus OX=10090 GN=Smarcc2 PE=1 SV=2	sp|Q6PDG5|SMRC2_MOUSE	133	0	0	0	0	0	2	2	2	0	0	0	0	0	0.0150376	0.0150376	0.0150376	0	0	0	0	0	3.33682e-05	3.05834e-05	2.99055e-05
39S ribosomal protein L16, mitochondrial OS=Mus musculus OX=10090 GN=Mrpl16 PE=1 SV=1	sp|Q99N93|RM16_MOUSE	29	0	3	0	0	0	0	0	0	0	0.103448	0	0	0	0	0	0	0	0.000266432	0	0	0	0	0	0
39S ribosomal protein L27, mitochondrial OS=Mus musculus OX=10090 GN=Mrpl27 PE=1 SV=1	sp|Q99N92|RM27_MOUSE	16	0	3	0	0	0	0	0	0	0	0.1875	0	0	0	0	0	0	0	0.000482909	0	0	0	0	0	0
40S ribosomal protein S6 OS=Mus musculus OX=10090 GN=Rps6 PE=1 SV=1	sp|P62754|RS6_MOUSE	29	0	0	0	0	3	0	0	0	0	0	0	0	0.103448	0	0	0	0	0	0	0	0.000281754	0	0	0
Arf-GAP with SH3 domain, ANK repeat and PH domain-containing protein 1 OS=Mus musculus OX=10090 GN=Asap1 PE=1 SV=2	sp|Q9QWY8|ASAP1_MOUSE	127	0	0	0	0	0	4	0	3	0	0	0	0	0	0.0314961	0	0.023622	0	0	0	0	0	6.98893e-05	0	4.69776e-05
Rho GTPase-activating protein 24 OS=Mus musculus OX=10090 GN=Arhgap24 PE=1 SV=2	sp|Q8C4V1|RHG24_MOUSE	84	5	0	0	0	0	0	0	0	0.0595238	0	0	0	0	0	0	0	0.000215966	0	0	0	0	0	0	0
Phosphoglucomutase-like protein 5 OS=Mus musculus OX=10090 GN=Pgm5 PE=1 SV=2	sp|Q8BZF8|PGM5_MOUSE	62	0	0	0	0	4	0	0	0	0	0	0	0	0.0645161	0	0	0	0	0	0	0	0.000175718	0	0	0
Chloride intracellular channel protein 1 OS=Mus musculus OX=10090 GN=Clic1 PE=1 SV=3	sp|Q9Z1Q5|CLIC1_MOUSE	27	0	0	0	0	0	0	0	2	0	0	0	0	0	0	0	0.0740741	0	0	0	0	0	0	0	0.000147312
Beta-parvin OS=Mus musculus OX=10090 GN=Parvb PE=1 SV=1	sp|Q9ES46|PARVB_MOUSE	42	0	0	0	0	0	0	2	3	0	0	0	0	0	0	0.047619	0.0714286	0	0	0	0	0	0	9.68475e-05	0.000142051
RNA-splicing ligase RtcB homolog OS=Mus musculus OX=10090 GN=Rtcb PE=1 SV=1	sp|Q99LF4|RTCB_MOUSE	55	0	0	2	0	0	2	0	0	0	0	0.0363636	0	0	0.0363636	0	0	0	0	8.7524e-05	0	0	8.06904e-05	0	0
Protein disulfide-isomerase A3 OS=Mus musculus OX=10090 GN=Pdia3 PE=1 SV=2	sp|P27773|PDIA3_MOUSE	57	0	0	0	0	0	0	0	4	0	0	0	0	0	0	0	0.0701754	0	0	0	0	0	0	0	0.000139559
CAP-Gly domain-containing linker protein 1 OS=Mus musculus OX=10090 GN=Clip1 PE=1 SV=1	sp|Q922J3|CLIP1_MOUSE	156	0	0	0	0	0	3	2	2	0	0	0	0	0	0.0192308	0.0128205	0.0128205	0	0	0	0	0	4.26728e-05	2.60743e-05	2.54964e-05
Transcription elongation factor, mitochondrial OS=Mus musculus OX=10090 GN=Tefm PE=1 SV=1	sp|Q5SSK3|TEFM_MOUSE	42	2	0	0	0	0	2	0	0	0.047619	0	0	0	0	0.047619	0	0	0.000172773	0	0	0	0	0.000105666	0	0
Rho GDP-dissociation inhibitor 1 OS=Mus musculus OX=10090 GN=Arhgdia PE=1 SV=3	sp|Q99PT1|GDIR1_MOUSE	23	0	0	0	0	0	0	0	2	0	0	0	0	0	0	0	0.0869565	0	0	0	0	0	0	0	0.000172932
Heat shock protein beta-7 OS=Mus musculus OX=10090 GN=Hspb7 PE=1 SV=3	sp|P35385|HSPB7_MOUSE	19	0	0	0	0	0	3	0	0	0	0	0	0	0	0.157895	0	0	0	0	0	0	0	0.000350366	0	0
Peptidyl-prolyl cis-trans isomerase F, mitochondrial OS=Mus musculus OX=10090 GN=Ppif PE=1 SV=1	sp|Q99KR7|PPIF_MOUSE	22	0	0	0	0	0	0	2	0	0	0	0	0	0	0	0.0909091	0	0	0	0	0	0	0	0.000184891	0
Mitochondrial amidoxime reducing component 2 OS=Mus musculus OX=10090 GN=Mtarc2 PE=1 SV=1	sp|Q922Q1|MARC2_MOUSE	38	0	0	0	0	0	0	4	0	0	0	0	0	0	0	0.105263	0	0	0	0	0	0	0	0.000214084	0
Complex I intermediate-associated protein 30, mitochondrial OS=Mus musculus OX=10090 GN=Ndufaf1 PE=1 SV=2	sp|Q9CWX2|CIA30_MOUSE	38	0	0	0	0	0	0	4	0	0	0	0	0	0	0	0.105263	0	0	0	0	0	0	0	0.000214084	0
Protein transport protein Sec23A OS=Mus musculus OX=10090 GN=Sec23a PE=1 SV=2	sp|Q01405|SC23A_MOUSE	86	0	0	0	0	0	0	3	0	0	0	0	0	0	0	0.0348837	0	0	0	0	0	0	0	7.09464e-05	0
Proteasome subunit beta type-5 OS=Mus musculus OX=10090 GN=Psmb5 PE=1 SV=3	sp|O55234|PSB5_MOUSE	29	0	2	0	0	0	2	2	0	0	0.0689655	0	0	0	0.0689655	0.0689655	0	0	0.000177622	0	0	0	0.000153033	0.000140262	0
Ras-related protein Rap-1b OS=Mus musculus OX=10090 GN=Rap1b PE=1 SV=2	sp|Q99JI6|RAP1B_MOUSE	21	0	0	0	0	0	0	2	2	0	0	0	0	0	0	0.0952381	0.0952381	0	0	0	0	0	0	0.000193695	0.000189402
Proteasome subunit alpha type-3 OS=Mus musculus OX=10090 GN=Psma3 PE=1 SV=3	sp|O70435|PSA3_MOUSE	28	0	0	0	0	3	0	0	0	0	0	0	0	0.107143	0	0	0	0	0	0	0	0.000291817	0	0	0
A-kinase anchor protein 1, mitochondrial OS=Mus musculus OX=10090 GN=Akap1 PE=1 SV=4	sp|O08715|AKAP1_MOUSE	92	0	0	0	0	2	0	0	2	0	0	0	0	0.0217391	0	0	0.0217391	0	0	0	0	5.92092e-05	0	0	4.3233e-05
T-complex protein 1 subunit epsilon OS=Mus musculus OX=10090 GN=Cct5 PE=1 SV=1	sp|P80316|TCPE_MOUSE	60	0	0	0	0	0	0	3	2	0	0	0	0	0	0	0.05	0.0333333	0	0	0	0	0	0	0.00010169	6.62906e-05
Sorbin and SH3 domain-containing protein 1 OS=Mus musculus OX=10090 GN=Sorbs1 PE=1 SV=2	sp|Q62417|SRBS1_MOUSE	143	0	0	0	2	0	0	0	0	0	0	0	0.013986	0	0	0	0	0	0	0	3.81585e-05	0	0	0	0
Nucleophosmin OS=Mus musculus OX=10090 GN=Npm1 PE=1 SV=1	sp|Q61937|NPM_MOUSE	33	0	0	0	0	0	0	0	4	0	0	0	0	0	0	0	0.121212	0	0	0	0	0	0	0	0.000241057
Leucine-rich repeat-containing protein 15 OS=Mus musculus OX=10090 GN=Lrrc15 PE=2 SV=1	sp|Q80X72|LRC15_MOUSE	64	0	0	0	5	0	0	0	0	0	0	0	0.078125	0	0	0	0	0	0	0	0.000213151	0	0	0	0
Xin actin-binding repeat-containing protein 1 OS=Mus musculus OX=10090 GN=Xirp1 PE=1 SV=2	sp|O70373|XIRP1_MOUSE	123	0	4	0	0	0	0	0	0	0	0.0325203	0	0	0	0	0	0	0	8.37566e-05	0	0	0	0	0	0
Desmoglein-4 OS=Mus musculus OX=10090 GN=Dsg4 PE=1 SV=1	sp|Q7TMD7|DSG4_MOUSE	114	4	0	0	3	0	0	0	0	0.0350877	0	0	0.0263158	0	0	0	0	0.000127306	0	0	7.17982e-05	0	0	0	0
Glucose-6-phosphate isomerase OS=Mus musculus OX=10090 GN=Gpi PE=1 SV=4	sp|P06745|G6PI_MOUSE	63	3	0	0	0	0	0	0	5	0.047619	0	0	0	0	0	0	0.0793651	0.000172773	0	0	0	0	0	0	0.000157835
Serpin B5 OS=Mus musculus OX=10090 GN=Serpinb5 PE=1 SV=1	sp|P70124|SPB5_MOUSE	42	7	0	0	0	0	0	0	0	0.166667	0	0	0	0	0	0	0	0.000604704	0	0	0	0	0	0	0
Methylmalonyl-CoA mutase, mitochondrial OS=Mus musculus OX=10090 GN=Mmut PE=1 SV=2	sp|P16332|MUTA_MOUSE	83	0	0	0	0	2	0	0	0	0	0	0	0	0.0240964	0	0	0	0	0	0	0	6.56295e-05	0	0	0
ATPase inhibitor, mitochondrial OS=Mus musculus OX=10090 GN=Atp5if1 PE=1 SV=2	sp|O35143|ATIF1_MOUSE	12	0	0	2	0	0	0	2	0	0	0	0.166667	0	0	0	0.166667	0	0	0	0.000401152	0	0	0	0.000338966	0
Ubiquitin carboxyl-terminal hydrolase 5 OS=Mus musculus OX=10090 GN=Usp5 PE=1 SV=1	sp|P56399|UBP5_MOUSE	96	0	0	0	2	0	0	0	0	0	0	0	0.0208333	0	0	0	0	0	0	0	5.68403e-05	0	0	0	0
Centrosomal protein of 112 kDa OS=Mus musculus OX=10090 GN=Cep112 PE=2 SV=2	sp|Q5PR68|CE112_MOUSE	113	2	0	0	0	0	0	0	0	0.0176991	0	0	0	0	0	0	0	6.42164e-05	0	0	0	0	0	0	0
Actin-related protein 3 OS=Mus musculus OX=10090 GN=Actr3 PE=1 SV=3	sp|Q99JY9|ARP3_MOUSE	47	2	0	0	2	0	0	0	0	0.0425532	0	0	0.0425532	0	0	0	0	0.000154393	0	0	0.000116099	0	0	0	0
28S ribosomal protein S28, mitochondrial OS=Mus musculus OX=10090 GN=Mrps28 PE=1 SV=1	sp|Q9CY16|RT28_MOUSE	21	0	3	0	0	0	0	0	0	0	0.142857	0	0	0	0	0	0	0	0.000367931	0	0	0	0	0	0
Chromodomain-helicase-DNA-binding protein 6 OS=Mus musculus OX=10090 GN=Chd6 PE=1 SV=1	sp|A3KFM7|CHD6_MOUSE	305	0	0	0	0	0	0	2	0	0	0	0	0	0	0	0.00655738	0	0	0	0	0	0	0	1.33364e-05	0
LIM zinc-binding domain-containing Nebulette OS=Mus musculus OX=10090 GN=Nebl PE=1 SV=1	sp|Q9DC07|LNEBL_MOUSE	31	0	0	0	0	0	0	0	2	0	0	0	0	0	0	0	0.0645161	0	0	0	0	0	0	0	0.000128304
Protein SEC13 homolog OS=Mus musculus OX=10090 GN=Sec13 PE=1 SV=3	sp|Q9D1M0|SEC13_MOUSE	36	0	0	0	0	0	0	0	2	0	0	0	0	0	0	0	0.0555556	0	0	0	0	0	0	0	0.000110484
Arginine--tRNA ligase, cytoplasmic OS=Mus musculus OX=10090 GN=Rars1 PE=1 SV=2	sp|Q9D0I9|SYRC_MOUSE	76	0	0	0	0	0	0	2	0	0	0	0	0	0	0	0.0263158	0	0	0	0	0	0	0	5.3521e-05	0
Cytosol aminopeptidase OS=Mus musculus OX=10090 GN=Lap3 PE=1 SV=3	sp|Q9CPY7|AMPL_MOUSE	56	0	0	0	0	0	0	2	0	0	0	0	0	0	0	0.0357143	0	0	0	0	0	0	0	7.26356e-05	0
Long-chain fatty acid transport protein 1 OS=Mus musculus OX=10090 GN=Slc27a1 PE=1 SV=1	sp|Q60714|S27A1_MOUSE	71	0	2	0	0	0	0	0	0	0	0.028169	0	0	0	0	0	0	0	7.25497e-05	0	0	0	0	0	0
Eukaryotic translation initiation factor 2 subunit 2 OS=Mus musculus OX=10090 GN=Eif2s2 PE=1 SV=1	sp|Q99L45|IF2B_MOUSE	38	0	0	0	0	0	2	0	0	0	0	0	0	0	0.0526316	0	0	0	0	0	0	0	0.000116789	0	0
Delta-sarcoglycan OS=Mus musculus OX=10090 GN=Sgcd PE=1 SV=1	sp|P82347|SGCD_MOUSE	32	0	0	0	0	0	2	0	0	0	0	0	0	0	0.0625	0	0	0	0	0	0	0	0.000138687	0	0
Band 4.1-like protein 2 OS=Mus musculus OX=10090 GN=Epb41l2 PE=1 SV=2	sp|O70318|E41L2_MOUSE	110	0	3	0	0	0	0	0	0	0	0.0272727	0	0	0	0	0	0	0	7.02413e-05	0	0	0	0	0	0
Growth factor receptor-bound protein 2 OS=Mus musculus OX=10090 GN=Grb2 PE=1 SV=1	sp|Q60631|GRB2_MOUSE	25	0	0	0	0	0	0	0	2	0	0	0	0	0	0	0	0.08	0	0	0	0	0	0	0	0.000159097
T-complex protein 1 subunit delta OS=Mus musculus OX=10090 GN=Cct4 PE=1 SV=3	sp|P80315|TCPD_MOUSE	58	0	0	0	0	0	0	0	3	0	0	0	0	0	0	0	0.0517241	0	0	0	0	0	0	0	0.000102865
Protein POF1B OS=Mus musculus OX=10090 GN=Pof1b PE=2 SV=3	sp|Q8K4L4|POF1B_MOUSE	68	3	0	0	0	0	0	0	0	0.0441176	0	0	0	0	0	0	0	0.000160069	0	0	0	0	0	0	0
Gephyrin OS=Mus musculus OX=10090 GN=Gphn PE=1 SV=2	sp|Q8BUV3|GEPH_MOUSE	83	0	0	0	0	0	0	2	0	0	0	0	0	0	0	0.0240964	0	0	0	0	0	0	0	4.90072e-05	0
NADH dehydrogenase [ubiquinone] 1 alpha subcomplex assembly factor 3 OS=Mus musculus OX=10090 GN=Ndufaf3 PE=1 SV=1	sp|Q9JKL4|NDUF3_MOUSE	21	0	0	0	0	0	0	0	3	0	0	0	0	0	0	0	0.142857	0	0	0	0	0	0	0	0.000284102
Galectin-3 OS=Mus musculus OX=10090 GN=Lgals3 PE=1 SV=3	sp|P16110|LEG3_MOUSE	28	2	0	0	0	0	0	0	0	0.0714286	0	0	0	0	0	0	0	0.000259159	0	0	0	0	0	0	0
Matrix metalloproteinase-9 OS=Mus musculus OX=10090 GN=Mmp9 PE=1 SV=2	sp|P41245|MMP9_MOUSE	81	0	4	0	0	0	0	0	0	0	0.0493827	0	0	0	0	0	0	0	0.000127186	0	0	0	0	0	0
High mobility group protein B1 OS=Mus musculus OX=10090 GN=Hmgb1 PE=1 SV=2	sp|P63158|HMGB1_MOUSE	25	0	0	0	0	0	0	0	6	0	0	0	0	0	0	0	0.24	0	0	0	0	0	0	0	0.000477292
Heterogeneous nuclear ribonucleoproteins C1/C2 OS=Mus musculus OX=10090 GN=Hnrnpc PE=1 SV=1	sp|Q9Z204|HNRPC_MOUSE	34	0	0	0	0	0	0	0	4	0	0	0	0	0	0	0	0.117647	0	0	0	0	0	0	0	0.000233967
Heat shock 70 kDa protein 12B OS=Mus musculus OX=10090 GN=Hspa12b PE=1 SV=1	sp|Q9CZJ2|HS12B_MOUSE	76	0	0	3	0	0	0	0	0	0	0	0.0394737	0	0	0	0	0	0	0	9.50096e-05	0	0	0	0	0
T-complex protein 1 subunit eta OS=Mus musculus OX=10090 GN=Cct7 PE=1 SV=1	sp|P80313|TCPH_MOUSE	60	0	0	0	0	0	0	0	3	0	0	0	0	0	0	0	0.05	0	0	0	0	0	0	0	9.94358e-05
Histidine-rich glycoprotein OS=Mus musculus OX=10090 GN=Hrg PE=1 SV=2	sp|Q9ESB3|HRG_MOUSE	59	0	0	0	0	0	2	0	2	0	0	0	0	0	0.0338983	0	0.0338983	0	0	0	0	0	7.52198e-05	0	6.74141e-05
Thymosin beta-4 OS=Mus musculus OX=10090 GN=Tmsb4x PE=1 SV=1	sp|P20065|TYB4_MOUSE	6	0	0	0	0	0	0	0	6	0	0	0	0	0	0	0	1	0	0	0	0	0	0	0	0.00198872
Complement C1q subcomponent subunit B OS=Mus musculus OX=10090 GN=C1qb PE=1 SV=2	sp|P14106|C1QB_MOUSE	27	0	2	0	0	0	0	0	0	0	0.0740741	0	0	0	0	0	0	0	0.000190779	0	0	0	0	0	0
Heterogeneous nuclear ribonucleoprotein L OS=Mus musculus OX=10090 GN=Hnrnpl PE=1 SV=2	sp|Q8R081|HNRPL_MOUSE	64	0	0	0	0	0	0	0	2	0	0	0	0	0	0	0	0.03125	0	0	0	0	0	0	0	6.21474e-05
Peptidyl-tRNA hydrolase ICT1, mitochondrial OS=Mus musculus OX=10090 GN=Mrpl58 PE=1 SV=1	sp|Q8R035|ICT1_MOUSE	23	0	0	0	2	0	0	0	0	0	0	0	0.0869565	0	0	0	0	0	0	0	0.000237246	0	0	0	0
AP-2 complex subunit mu OS=Mus musculus OX=10090 GN=Ap2m1 PE=1 SV=1	sp|P84091|AP2M1_MOUSE	50	0	2	0	0	0	0	0	0	0	0.04	0	0	0	0	0	0	0	0.000103021	0	0	0	0	0	0
Filamin-A-interacting protein 1 OS=Mus musculus OX=10090 GN=Filip1 PE=1 SV=2	sp|Q9CS72|FLIP1_MOUSE	138	2	0	0	0	0	0	0	0	0.0144928	0	0	0	0	0	0	0	5.2583e-05	0	0	0	0	0	0	0
LIM and cysteine-rich domains protein 1 OS=Mus musculus OX=10090 GN=Lmcd1 PE=1 SV=1	sp|Q8VEE1|LMCD1_MOUSE	41	0	0	0	0	0	0	0	2	0	0	0	0	0	0	0	0.0487805	0	0	0	0	0	0	0	9.70106e-05
Mitochondrial import inner membrane translocase subunit TIM16 OS=Mus musculus OX=10090 GN=Pam16 PE=1 SV=1	sp|Q9CQV1|TIM16_MOUSE	14	0	0	0	0	0	2	2	0	0	0	0	0	0	0.142857	0.142857	0	0	0	0	0	0	0.000316998	0.000290542	0
60S acidic ribosomal protein P2 OS=Mus musculus OX=10090 GN=Rplp2 PE=1 SV=3	sp|P99027|RLA2_MOUSE	12	0	0	0	0	0	0	0	4	0	0	0	0	0	0	0	0.333333	0	0	0	0	0	0	0	0.000662906
AP-2 complex subunit beta OS=Mus musculus OX=10090 GN=Ap2b1 PE=1 SV=1	sp|Q9DBG3|AP2B1_MOUSE	105	0	2	0	0	0	0	0	0	0	0.0190476	0	0	0	0	0	0	0	4.90574e-05	0	0	0	0	0	0
Myelin basic protein OS=Mus musculus OX=10090 GN=Mbp PE=1 SV=2	sp|P04370|MBP_MOUSE	27	0	0	0	0	0	0	0	3	0	0	0	0	0	0	0	0.111111	0	0	0	0	0	0	0	0.000220969
Calreticulin OS=Mus musculus OX=10090 GN=Calr PE=1 SV=1	sp|P14211|CALR_MOUSE	48	0	0	0	0	0	0	0	5	0	0	0	0	0	0	0	0.104167	0	0	0	0	0	0	0	0.000207158
V-set and immunoglobulin domain-containing protein 8 OS=Mus musculus OX=10090 GN=Vsig8 PE=2 SV=2	sp|Q6P3A4|VSIG8_MOUSE	44	0	0	0	5	0	0	0	0	0	0	0	0.113636	0	0	0	0	0	0	0	0.000310038	0	0	0	0
Keratin-associated protein 9-3 OS=Mus musculus OX=10090 GN=Krtap9-3 PE=2 SV=1	sp|Q3V2C1|KRA93_MOUSE	14	0	0	0	4	0	0	0	0	0	0	0	0.285714	0	0	0	0	0	0	0	0.000779524	0	0	0	0
Fibrinogen alpha chain OS=Mus musculus OX=10090 GN=Fga PE=1 SV=1	sp|E9PV24|FIBA_MOUSE	87	0	2	0	0	0	0	0	0	0	0.0229885	0	0	0	0	0	0	0	5.92072e-05	0	0	0	0	0	0
NEDD8-conjugating enzyme Ubc12 OS=Mus musculus OX=10090 GN=Ube2m PE=1 SV=1	sp|P61082|UBC12_MOUSE	21	0	0	0	0	0	0	2	0	0	0	0	0	0	0	0.0952381	0	0	0	0	0	0	0	0.000193695	0
28S ribosomal protein S23, mitochondrial OS=Mus musculus OX=10090 GN=Mrps23 PE=1 SV=1	sp|Q8VE22|RT23_MOUSE	20	0	0	0	0	0	0	0	2	0	0	0	0	0	0	0	0.1	0	0	0	0	0	0	0	0.000198872
Hypoxia up-regulated protein 1 OS=Mus musculus OX=10090 GN=Hyou1 PE=1 SV=1	sp|Q9JKR6|HYOU1_MOUSE	111	0	0	0	0	0	0	2	0	0	0	0	0	0	0	0.018018	0	0	0	0	0	0	0	3.6645e-05	0
Transmembrane emp24 domain-containing protein 10 OS=Mus musculus OX=10090 GN=Tmed10 PE=1 SV=1	sp|Q9D1D4|TMEDA_MOUSE	25	0	0	0	0	0	0	2	0	0	0	0	0	0	0	0.08	0	0	0	0	0	0	0	0.000162704	0
Flotillin-1 OS=Mus musculus OX=10090 GN=Flot1 PE=1 SV=1	sp|O08917|FLOT1_MOUSE	48	0	0	0	0	0	0	0	2	0	0	0	0	0	0	0	0.0416667	0	0	0	0	0	0	0	8.28632e-05
[3-methyl-2-oxobutanoate dehydrogenase [lipoamide]] kinase, mitochondrial OS=Mus musculus OX=10090 GN=Bckdk PE=1 SV=1	sp|O55028|BCKD_MOUSE	47	0	0	0	0	0	0	2	0	0	0	0	0	0	0	0.0425532	0	0	0	0	0	0	0	8.65445e-05	0
Eukaryotic translation initiation factor 4 gamma 1 OS=Mus musculus OX=10090 GN=Eif4g1 PE=1 SV=1	sp|Q6NZJ6|IF4G1_MOUSE	176	0	0	0	0	0	0	0	3	0	0	0	0	0	0	0	0.0170455	0	0	0	0	0	0	0	3.38986e-05
Proliferation-associated protein 2G4 OS=Mus musculus OX=10090 GN=Pa2g4 PE=1 SV=3	sp|P50580|PA2G4_MOUSE	44	0	0	0	0	0	0	0	4	0	0	0	0	0	0	0	0.0909091	0	0	0	0	0	0	0	0.000180792
Coatomer subunit beta OS=Mus musculus OX=10090 GN=Copb1 PE=1 SV=1	sp|Q9JIF7|COPB_MOUSE	107	0	0	0	0	0	0	2	0	0	0	0	0	0	0	0.0186916	0	0	0	0	0	0	0	3.80149e-05	0
Glycerophosphocholine phosphodiesterase GPCPD1 OS=Mus musculus OX=10090 GN=Gpcpd1 PE=1 SV=1	sp|Q8C0L9|GPCP1_MOUSE	77	0	0	0	0	0	0	2	0	0	0	0	0	0	0	0.025974	0	0	0	0	0	0	0	5.28259e-05	0
Chromobox protein homolog 3 OS=Mus musculus OX=10090 GN=Cbx3 PE=1 SV=2	sp|P23198|CBX3_MOUSE	21	0	0	0	0	0	0	0	2	0	0	0	0	0	0	0	0.0952381	0	0	0	0	0	0	0	0.000189402
WD repeat-containing protein 1 OS=Mus musculus OX=10090 GN=Wdr1 PE=1 SV=3	sp|O88342|WDR1_MOUSE	66	0	0	0	0	0	0	0	2	0	0	0	0	0	0	0	0.030303	0	0	0	0	0	0	0	6.02641e-05
Coronin-1A OS=Mus musculus OX=10090 GN=Coro1a PE=1 SV=5	sp|O89053|COR1A_MOUSE	51	0	0	0	0	0	0	0	4	0	0	0	0	0	0	0	0.0784314	0	0	0	0	0	0	0	0.000155978
Adenylyl cyclase-associated protein 1 OS=Mus musculus OX=10090 GN=Cap1 PE=1 SV=4	sp|P40124|CAP1_MOUSE	52	0	0	0	0	0	0	0	3	0	0	0	0	0	0	0	0.0576923	0	0	0	0	0	0	0	0.000114734
Prothymosin alpha OS=Mus musculus OX=10090 GN=Ptma PE=1 SV=2	sp|P26350|PTMA_MOUSE	12	0	0	0	0	0	0	0	4	0	0	0	0	0	0	0	0.333333	0	0	0	0	0	0	0	0.000662906
Serine hydroxymethyltransferase, mitochondrial OS=Mus musculus OX=10090 GN=Shmt2 PE=1 SV=1	sp|Q9CZN7|GLYM_MOUSE	56	0	0	0	0	0	0	0	4	0	0	0	0	0	0	0	0.0714286	0	0	0	0	0	0	0	0.000142051
Dual specificity protein phosphatase 14 OS=Mus musculus OX=10090 GN=Dusp14 PE=2 SV=2	sp|Q9JLY7|DUS14_MOUSE	22	0	0	0	3	0	0	0	0	0	0	0	0.136364	0	0	0	0	0	0	0	0.000372045	0	0	0	0
Heterogeneous nuclear ribonucleoprotein D-like OS=Mus musculus OX=10090 GN=Hnrnpdl PE=1 SV=1	sp|Q9Z130|HNRDL_MOUSE	34	0	0	0	0	0	0	0	2	0	0	0	0	0	0	0	0.0588235	0	0	0	0	0	0	0	0.000116983
Bis(5'-nucleosyl)-tetraphosphatase [asymmetrical] OS=Mus musculus OX=10090 GN=Nudt2 PE=1 SV=3	sp|P56380|AP4A_MOUSE	17	0	0	0	0	0	0	2	0	0	0	0	0	0	0	0.117647	0	0	0	0	0	0	0	0.00023927	0
Transgelin-2 OS=Mus musculus OX=10090 GN=Tagln2 PE=1 SV=4	sp|Q9WVA4|TAGL2_MOUSE	22	0	0	0	0	0	0	0	3	0	0	0	0	0	0	0	0.136364	0	0	0	0	0	0	0	0.000271189
Heterogeneous nuclear ribonucleoprotein D0 OS=Mus musculus OX=10090 GN=Hnrnpd PE=1 SV=2	sp|Q60668|HNRPD_MOUSE	38	0	0	0	0	0	0	0	3	0	0	0	0	0	0	0	0.0789474	0	0	0	0	0	0	0	0.000157004
Thymosin beta-10 OS=Mus musculus OX=10090 GN=Tmsb10 PE=1 SV=3	sp|Q6ZWY8|TYB10_MOUSE	5	0	0	0	0	0	0	0	3	0	0	0	0	0	0	0	0.6	0	0	0	0	0	0	0	0.00119323
Proteasome activator complex subunit 1 OS=Mus musculus OX=10090 GN=Psme1 PE=1 SV=2	sp|P97371|PSME1_MOUSE	29	0	0	0	0	0	0	0	3	0	0	0	0	0	0	0	0.103448	0	0	0	0	0	0	0	0.000205729
Proliferating cell nuclear antigen OS=Mus musculus OX=10090 GN=Pcna PE=1 SV=2	sp|P17918|PCNA_MOUSE	29	0	0	0	0	0	0	0	2	0	0	0	0	0	0	0	0.0689655	0	0	0	0	0	0	0	0.000137153
Proteasome activator complex subunit 2 OS=Mus musculus OX=10090 GN=Psme2 PE=1 SV=4	sp|P97372|PSME2_MOUSE	27	0	0	0	0	0	0	0	2	0	0	0	0	0	0	0	0.0740741	0	0	0	0	0	0	0	0.000147312
COP9 signalosome complex subunit 4 OS=Mus musculus OX=10090 GN=Cops4 PE=1 SV=1	sp|O88544|CSN4_MOUSE	46	0	0	0	0	0	0	0	2	0	0	0	0	0	0	0	0.0434783	0	0	0	0	0	0	0	8.6466e-05
Coactosin-like protein OS=Mus musculus OX=10090 GN=Cotl1 PE=1 SV=3	sp|Q9CQI6|COTL1_MOUSE	16	0	0	0	0	0	0	0	2	0	0	0	0	0	0	0	0.125	0	0	0	0	0	0	0	0.00024859
Enhancer of rudimentary homolog OS=Mus musculus OX=10090 GN=Erh PE=1 SV=1	sp|P84089|ERH_MOUSE	12	0	0	0	0	0	0	0	2	0	0	0	0	0	0	0	0.166667	0	0	0	0	0	0	0	0.000331453
Histone H1.5 OS=Mus musculus OX=10090 GN=H1-5 PE=1 SV=2	sp|P43276|H15_MOUSE	23	0	0	0	0	0	0	0	2	0	0	0	0	0	0	0	0.0869565	0	0	0	0	0	0	0	0.000172932
Tripartite motif-containing protein 29 OS=Mus musculus OX=10090 GN=Trim29 PE=1 SV=1	sp|Q8R2Q0|TRI29_MOUSE	66	2	0	0	0	0	0	0	0	0.030303	0	0	0	0	0	0	0	0.000109946	0	0	0	0	0	0	0

## Sheet: Mean
			Control-1	Control-2	Control-3	Control-4	14-3-3_1	14-3-3_2	14-3-3_3	14-3-3_4	Control	14-3-3
Identified Proteins (912)	Accession Number	Molecular Weight	52753 NSAF	52754 NSAF	52755 NSAF	52756 NSAF	52757 NSAF	52758 NSAF	52759 NSAF	52760 NSAF	Mean	Mean
Ig gamma-1 chain C region secreted form OS=Mus musculus OX=10090 GN=Ighg1 PE=1 SV=1	sp|P01868|IGHG1_MOUSE	36	0.066719	0.0828457	0.0869162	0.0970074	0.0496305	0.0636109	0.0606749	0.0592748	0.0833721	0.0582978
Immunoglobulin kappa constant OS=Mus musculus OX=10090 GN=Igkc PE=1 SV=2	sp|P01837|IGKC_MOUSE	12	0.116103	0.152599	0.17771	0.179615	0.0896526	0.12038	0.119825	0.122969	0.156507	0.113207
Myosin-6 OS=Mus musculus OX=10090 GN=Myh6 PE=1 SV=2	sp|Q02566|MYH6_MOUSE	224	0.00434091	0.00617433	0.00232095	0.00411686	0.00460827	0.00334829	0.00140731	0.00386202	0.00423826	0.00330647
Stress-70 protein, mitochondrial OS=Mus musculus OX=10090 GN=Hspa9 PE=1 SV=3	sp|P38647|GRP75_MOUSE	73	0.0127236	0.0107607	0.0136172	0.0119224	0.0104468	0.00887594	0.00961178	0.0091263	0.012256	0.0095152
ATP synthase subunit alpha, mitochondrial OS=Mus musculus OX=10090 GN=Atp5f1a PE=1 SV=1	sp|Q03265|ATPA_MOUSE	60	0.0134849	0.0107742	0.0106706	0.0105496	0.0133911	0.0121674	0.0128468	0.0119654	0.0113698	0.0125927
Desmoplakin OS=Mus musculus OX=10090 GN=Dsp PE=1 SV=1	sp|E9Q557|DESP_MOUSE	333	0.00403136	0.00184849	0.00256593	0.00262182	0.00232285	0.0017392	0.0012215	0.000537491	0.0027669	0.00145526
Sarcoplasmic/endoplasmic reticulum calcium ATPase 2 OS=Mus musculus OX=10090 GN=Atp2a2 PE=1 SV=2	sp|O55143|AT2A2_MOUSE	115	0.00384907	0.00436718	0.0051487	0.00469748	0.00556567	0.00526768	0.00530556	0.00515337	0.00451561	0.00532307
Myosin-9 OS=Mus musculus OX=10090 GN=Myh9 PE=1 SV=4	sp|Q8VDD5|MYH9_MOUSE	226	0.00285763	0.00385187	0.00140581	0.00277662	0.00384441	0.00193425	0.0010259	0.00276308	0.00272298	0.00239191
Myosin-7 OS=Mus musculus OX=10090 GN=Myh7 PE=2 SV=1	sp|Q91Z83|MYH7_MOUSE	223	0	0.00206734	0	0	0.00164883	0	0	0	0.000516835	0.000412208
ADP/ATP translocase 1 OS=Mus musculus OX=10090 GN=Slc25a4 PE=1 SV=4	sp|P48962|ADT1_MOUSE	33	0.0155024	0.0131898	0.0152438	0.0133936	0.0160116	0.0158019	0.0180577	0.0148852	0.0143324	0.0161891
ATP synthase subunit beta, mitochondrial OS=Mus musculus OX=10090 GN=Atp5f1b PE=1 SV=2	sp|P56480|ATPB_MOUSE	56	0.00855224	0.00763456	0.00769352	0.00740548	0.00958132	0.00907406	0.00969685	0.00870064	0.00782145	0.00926322
Endoplasmic reticulum chaperone BiP OS=Mus musculus OX=10090 GN=Hspa5 PE=1 SV=3	sp|P20029|BIP_MOUSE	72	0.0069541	0.00718998	0.00835733	0.00704819	0.00571204	0.00477698	0.00545171	0.00488893	0.0073874	0.00520742
Myosin-11 OS=Mus musculus OX=10090 GN=Myh11 PE=1 SV=1	sp|O08638|MYH11_MOUSE	227	0.00209382	0.00293858	0.000986091	0.00179084	0.00255565	0.00138809	0.000546527	0.00178722	0.00195233	0.00156937
Actin, alpha cardiac muscle 1 OS=Mus musculus OX=10090 GN=Actc1 PE=1 SV=1	sp|P68033|ACTC_MOUSE	42	0.0127852	0.0119577	0.00630381	0.00889956	0.0116727	0.00850611	0.00697302	0.00932803	0.00998657	0.00911996
Aconitate hydratase, mitochondrial OS=Mus musculus OX=10090 GN=Aco2 PE=1 SV=1	sp|Q99KI0|ACON_MOUSE	85	0.00431119	0.00421172	0.00458729	0.00420484	0.00474231	0.00446408	0.00466577	0.00402423	0.00432876	0.0044741
3-ketoacyl-CoA thiolase, mitochondrial OS=Mus musculus OX=10090 GN=Acaa2 PE=1 SV=3	sp|Q8BWT1|THIM_MOUSE	42	0.00932972	0.00925959	0.00796573	0.00824996	0.00946783	0.00903444	0.00968475	0.00828632	0.00870125	0.00911834
Actin, cytoplasmic 1 OS=Mus musculus OX=10090 GN=Actb PE=1 SV=1	sp|P60710|ACTB_MOUSE	42	0.0129579	0.00907562	0.00332383	0.00669091	0.00797633	0.00533613	0.00208222	0.00577675	0.00801208	0.00529286
Succinate dehydrogenase [ubiquinone] flavoprotein subunit, mitochondrial OS=Mus musculus OX=10090 GN=Sdha PE=1 SV=1	sp|Q8K2B3|SDHA_MOUSE	73	0.00347912	0.00416316	0.00441817	0.00485868	0.00611883	0.00510671	0.00562777	0.0054213	0.00422978	0.00556865
Trifunctional enzyme subunit alpha, mitochondrial OS=Mus musculus OX=10090 GN=Hadha PE=1 SV=1	sp|Q8BMS1|ECHA_MOUSE	83	0.00397793	0.00387879	0.00437884	0.00410894	0.00456125	0.00398348	0.00448415	0.00426496	0.00408612	0.00432346
Glycogen phosphorylase, muscle form OS=Mus musculus OX=10090 GN=Pygm PE=1 SV=3	sp|Q9WUB3|PYGM_MOUSE	97	0.00213205	0.0024162	0.00240691	0.00270021	0.00384677	0.00400332	0.00436113	0.00438748	0.00241384	0.00414968
Heat shock cognate 71 kDa protein OS=Mus musculus OX=10090 GN=Hspa8 PE=1 SV=1	sp|P63017|HSP7C_MOUSE	71	0.00536569	0.00467945	0.00532232	0.00511082	0.00429642	0.00346912	0.00335147	0.00434157	0.00511957	0.00386464
Junction plakoglobin OS=Mus musculus OX=10090 GN=Jup PE=1 SV=3	sp|Q02257|PLAK_MOUSE	82	0.00623878	0.00389468	0.00493123	0.00568957	0.00528117	0.00392382	0.00257945	0.00152792	0.00518857	0.00332809
Isocitrate dehydrogenase [NADP], mitochondrial OS=Mus musculus OX=10090 GN=Idh2 PE=1 SV=3	sp|P54071|IDHP_MOUSE	51	0.00412622	0.00404002	0.00542735	0.00417275	0.00624831	0.00543869	0.00634066	0.00592716	0.00444158	0.0059887
Glyceraldehyde-3-phosphate dehydrogenase OS=Mus musculus OX=10090 GN=Gapdh PE=1 SV=2	sp|P16858|G3P_MOUSE	36	0.00987684	0.00751192	0.0077556	0.00833657	0.00900309	0.00764317	0.0080222	0.0073472	0.00837023	0.00800392
14-3-3 protein beta/alpha OS=Mus musculus OX=10090 GN=Ywhab PE=1 SV=3	sp|Q9CQV8|1433B_MOUSE	28	0.00181411	0.000827844	0.00077365	0.00116929	0.0157581	0.0204464	0.0201201	0.0205974	0.00114622	0.0192305
ADP/ATP translocase 2 OS=Mus musculus OX=10090 GN=Slc25a5 PE=1 SV=3	sp|P51881|ADT2_MOUSE	33	0.00505753	0.00468275	0.00554319	0.00305904	0.00718046	0.00638799	0.00893638	0.00825619	0.00458563	0.00769025
Keratin, type II cytoskeletal 2 oral OS=Mus musculus OX=10090 GN=Krt76 PE=1 SV=1	sp|Q3UV17|K22O_MOUSE	63	0.00524077	0.00327049	0.00355306	0.00181889	0.00324241	0.00211332	0.000225977	0	0.0034708	0.00139543
2-oxoglutarate dehydrogenase, mitochondrial OS=Mus musculus OX=10090 GN=Ogdh PE=1 SV=3	sp|Q60597|ODO1_MOUSE	116	0.0014075	0.00168741	0.00255216	0.00190513	0.00255927	0.0027546	0.00327862	0.00330881	0.00188805	0.00297533
von Willebrand factor A domain-containing protein 8 OS=Mus musculus OX=10090 GN=Vwa8 PE=1 SV=2	sp|Q8CC88|VWA8_MOUSE	213	0.000255509	0.000278107	0.000474602	0.000448318	0.00159837	0.00262528	0.0023298	0.00206341	0.000364134	0.00215421
Very long-chain specific acyl-CoA dehydrogenase, mitochondrial OS=Mus musculus OX=10090 GN=Acadvl PE=1 SV=3	sp|P50544|ACADV_MOUSE	71	0.003015	0.00293826	0.00349172	0.00449599	0.00494856	0.00431296	0.00421082	0.00414549	0.00348524	0.00440446
Trifunctional enzyme subunit beta, mitochondrial OS=Mus musculus OX=10090 GN=Hadhb PE=1 SV=1	sp|Q99JY0|ECHB_MOUSE	51	0.00469535	0.00459552	0.00509699	0.00524268	0.0060347	0.00526465	0.00574249	0.00526425	0.00490764	0.00557652
Cytochrome b-c1 complex subunit 2, mitochondrial OS=Mus musculus OX=10090 GN=Uqcrc2 PE=1 SV=1	sp|Q9DB77|QCR2_MOUSE	48	0.00559351	0.00482909	0.00521497	0.00420618	0.00635512	0.00540878	0.00660984	0.00600758	0.00496094	0.00609533
Spectrin alpha chain, erythrocytic 1 OS=Mus musculus OX=10090 GN=Spta1 PE=1 SV=3	sp|P08032|SPTA1_MOUSE	280	0.00146425	0.00132455	0.000670497	0.00107185	0.00180926	0.000578521	0.000283279	0.000497179	0.00113278	0.000792061
MICOS complex subunit Mic60 OS=Mus musculus OX=10090 GN=Immt PE=1 SV=1	sp|Q8CAQ8|MIC60_MOUSE	84	0.00185731	0.0028208	0.00312325	0.00237105	0.00314514	0.0030379	0.0034623	0.00319615	0.0025431	0.00321037
Ig gamma-3 chain C region OS=Mus musculus OX=10090 PE=1 SV=2	sp|P03987|IGHG3_MOUSE	44	0.0042879	0.00643878	0.00738484	0.00905311	0.00346643	0.00443797	0.00536183	0.00610175	0.00679116	0.00484199
General transcription factor II-I OS=Mus musculus OX=10090 GN=Gtf2i PE=1 SV=3	sp|Q9ESZ8|GTF2I_MOUSE	112	0.00223525	0.00241454	0.00257883	0.00238729	0.00199408	0.00170386	0.001943	0.00172237	0.00240398	0.00184083
Spectrin beta chain, erythrocytic OS=Mus musculus OX=10090 GN=Sptb PE=1 SV=4	sp|P15508|SPTB1_MOUSE	245	0.00119954	0.00138762	0.000530503	0.00111361	0.00170088	0.00049814	0.000423362	0.00106335	0.00105782	0.000921433
Myoglobin OS=Mus musculus OX=10090 GN=Mb PE=1 SV=3	sp|P04247|MYG_MOUSE	17	0.0125921	0.0116656	0.0124593	0.0128392	0.0139385	0.0151413	0.0139973	0.0133361	0.012389	0.0141033
Myosin-10 OS=Mus musculus OX=10090 GN=Myh10 PE=1 SV=2	sp|Q61879|MYH10_MOUSE	229	0.000950627	0.00137211	0.000462463	0.00081016	0.00149859	0.000542634	0.000373011	0.000868435	0.000898839	0.000820667
Vimentin OS=Mus musculus OX=10090 GN=Vim PE=1 SV=3	sp|P20152|VIME_MOUSE	54	0.00147817	0.00224165	0.000579442	0.00161679	0.00615337	0.00698569	0.00508449	0.00644492	0.00147901	0.00616712
Single-stranded DNA-binding protein, mitochondrial OS=Mus musculus OX=10090 GN=Ssbp1 PE=1 SV=1	sp|Q9CYR0|SSBP_MOUSE	17	0.0130189	0.0146956	0.0128841	0.0128392	0.0115353	0.0126613	0.0107672	0.00900772	0.0133594	0.0109929
Creatine kinase S-type, mitochondrial OS=Mus musculus OX=10090 GN=Ckmt2 PE=1 SV=1	sp|Q6P8J7|KCRS_MOUSE	47	0.00478617	0.00345228	0.00348234	0.00359908	0.0052734	0.00344651	0.00419741	0.00351199	0.00382997	0.00410733
ATP synthase subunit O, mitochondrial OS=Mus musculus OX=10090 GN=Atp5po PE=1 SV=1	sp|Q9DB20|ATPO_MOUSE	23	0.00899169	0.00828644	0.00795327	0.0115064	0.00971031	0.0090689	0.00981528	0.00951125	0.00918446	0.00952644
Myosin-binding protein C, cardiac-type OS=Mus musculus OX=10090 GN=Mybpc3 PE=1 SV=1	sp|O70468|MYPC3_MOUSE	141	0.00131234	0.00131516	0.00148512	0.00135449	0.00160327	0.00132195	0.00144241	0.00152327	0.00136677	0.00147272
Spectrin beta chain, non-erythrocytic 1 OS=Mus musculus OX=10090 GN=Sptbn1 PE=1 SV=2	sp|Q62261|SPTB2_MOUSE	274	0.000794502	0.00109036	0.00040408	0.000806551	0.00122265	0.000421121	0.000319172	0.00064597	0.000773874	0.000652228
Glycogen phosphorylase, brain form OS=Mus musculus OX=10090 GN=Pygb PE=1 SV=3	sp|Q8CI94|PYGB_MOUSE	97	0.00175801	0.00146034	0.00166251	0.00174388	0.00207782	0.0019216	0.00220153	0.00241926	0.00165618	0.00215505
ATP synthase subunit gamma, mitochondrial OS=Mus musculus OX=10090 GN=Atp5f1c PE=1 SV=1	sp|Q91VR2|ATPG_MOUSE	33	0.0073664	0.00593149	0.00539732	0.00529131	0.00602499	0.00558108	0.00603976	0.00512245	0.00599663	0.00569207
NADH-ubiquinone oxidoreductase 75 kDa subunit, mitochondrial OS=Mus musculus OX=10090 GN=Ndufs1 PE=1 SV=2	sp|Q91VD9|NDUS1_MOUSE	80	0.00176876	0.00238235	0.002437	0.00221677	0.00279171	0.00274599	0.00251682	0.00223731	0.00220122	0.00257296
Cysteine and glycine-rich protein 3 OS=Mus musculus OX=10090 GN=Csrp3 PE=1 SV=1	sp|P50462|CSRP3_MOUSE	21	0.00984804	0.00956619	0.0100861	0.00987397	0.00894905	0.00940427	0.00910366	0.00899658	0.00984358	0.00911339
Spectrin alpha chain, non-erythrocytic 1 OS=Mus musculus OX=10090 GN=Sptan1 PE=1 SV=4	sp|P16546|SPTN1_MOUSE	285	0.000814759	0.000975984	0.000481382	0.00080414	0.0011659	0.000474941	0.000235492	0.000383787	0.000769067	0.000565031
Myosin-4 OS=Mus musculus OX=10090 GN=Myh4 PE=2 SV=1	sp|Q5SX39|MYH4_MOUSE	223	0.000748423	0.000646766	0.000518079	0.000293632	0.000916017	0	0	0	0.000551725	0.000229004
Carnitine O-palmitoyltransferase 1, muscle isoform OS=Mus musculus OX=10090 GN=Cpt1b PE=1 SV=1	sp|Q924X2|CPT1B_MOUSE	88	0.00136058	0.0016097	0.00196929	0.00155019	0.00201177	0.0019164	0.00228802	0.00212431	0.00162244	0.00208512
Phosphate carrier protein, mitochondrial OS=Mus musculus OX=10090 GN=Slc25a3 PE=1 SV=1	sp|Q8VEM8|MPCP_MOUSE	40	0.00380964	0.00321939	0.00415192	0.00313758	0.00442589	0.0043825	0.00483027	0.00432546	0.00357963	0.00449103
14-3-3 protein theta OS=Mus musculus OX=10090 GN=Ywhaq PE=1 SV=1	sp|P68254|1433T_MOUSE	28	0	0	0	0.000584643	0.00291817	0.00808345	0.00900681	0.00987256	0.000146161	0.00747025
Acyl-coenzyme A thioesterase 13 OS=Mus musculus OX=10090 GN=Acot13 PE=1 SV=1	sp|Q9CQR4|ACO13_MOUSE	15	0.0106428	0.00892845	0.00930672	0.0100039	0.00853402	0.00946767	0.00650815	0.00623131	0.00972046	0.00768529
Succinate--CoA ligase [ADP/GDP-forming] subunit alpha, mitochondrial OS=Mus musculus OX=10090 GN=Suclg1 PE=1 SV=4	sp|Q9WUM5|SUCA_MOUSE	36	0.00463607	0.00372019	0.0050144	0.00363778	0.00499331	0.00425305	0.00485851	0.00425364	0.00425211	0.00458963
Immunoglobulin heavy constant mu OS=Mus musculus OX=10090 GN=Ighm PE=1 SV=2	sp|P01872|IGHM_MOUSE	50	0.00246719	0.0029876	0.00332154	0.00349227	0.00228784	0.00252964	0.00301002	0.00250578	0.00306715	0.00258332
ATP-dependent 6-phosphofructokinase, muscle type OS=Mus musculus OX=10090 GN=Pfkm PE=1 SV=3	sp|P47857|PFKAM_MOUSE	85	0.00106713	0.00121201	0.0018689	0.00150861	0.0017303	0.00154024	0.0017706	0.00166116	0.00141416	0.00167558
Elongation factor 1-alpha 2 OS=Mus musculus OX=10090 GN=Eef1a2 PE=1 SV=1	sp|P62631|EF1A2_MOUSE	50	0.00420874	0.00314213	0.00284015	0.00305573	0.00332282	0.00266278	0.00280664	0.00266488	0.00331169	0.00286428
Beta-enolase OS=Mus musculus OX=10090 GN=Eno3 PE=1 SV=3	sp|P21550|ENOB_MOUSE	47	0.00223869	0.00175354	0.00276539	0.00203174	0.00295542	0.00269111	0.00272615	0.00253879	0.00219734	0.00272787
Ig gamma-2A chain C region secreted form OS=Mus musculus OX=10090 PE=1 SV=1	sp|P01864|GCAB_MOUSE	37	0.0029418	0.00549907	0.00429341	0.00398189	0.00287085	0.00425805	0.00373779	0.00322495	0.00417904	0.00352291
Keratin, type II cytoskeletal 74 OS=Mus musculus OX=10090 GN=Krt74 PE=3 SV=1	sp|Q6IFZ9|K2C74_MOUSE	55	0	0	0.000481382	0	0	0	0	0	0.000120346	0
Elongation factor Tu, mitochondrial OS=Mus musculus OX=10090 GN=Tufm PE=1 SV=1	sp|Q8BFR5|EFTU_MOUSE	50	0.00232206	0.00190588	0.00269574	0.0022918	0.00397649	0.00319534	0.00378286	0.00302285	0.00230387	0.00349439
Ig gamma-2B chain C region OS=Mus musculus OX=10090 GN=Igh-3 PE=1 SV=3	sp|P01867|IGG2B_MOUSE	44	0.00247379	0.00427301	0.00361037	0.00403049	0.00142371	0.00302589	0.0028658	0.00257629	0.00359692	0.00247292
Acetyl-CoA acetyltransferase, mitochondrial OS=Mus musculus OX=10090 GN=Acat1 PE=1 SV=1	sp|Q8QZT1|THIL_MOUSE	45	0.00419262	0.00268998	0.00267435	0.00206141	0.00357097	0.00251485	0.00320888	0.00256324	0.00290459	0.00296448
ATP synthase F(0) complex subunit B1, mitochondrial OS=Mus musculus OX=10090 GN=Atp5pb PE=1 SV=1	sp|Q9CQQ7|AT5F1_MOUSE	29	0.00487934	0.00373005	0.00439884	0.00357506	0.00544725	0.00512662	0.0056806	0.00507466	0.00414582	0.00533228
Cytochrome b-c1 complex subunit Rieske, mitochondrial OS=Mus musculus OX=10090 GN=Uqcrfs1 PE=1 SV=1	sp|Q9CR68|UCRI_MOUSE	29	0.00437889	0.00435173	0.00406685	0.00319874	0.00488374	0.00512662	0.00525982	0.00480035	0.00399905	0.00501763
Nascent polypeptide-associated complex subunit alpha, muscle-specific form OS=Mus musculus OX=10090 GN=Naca PE=1 SV=2	sp|P70670|NACAM_MOUSE	220	0.000544234	0.000725827	0.000459501	0.000768894	0.000953268	0.000373193	0.000443737	0.00072317	0.000624614	0.000623342
Medium-chain specific acyl-CoA dehydrogenase, mitochondrial OS=Mus musculus OX=10090 GN=Acadm PE=1 SV=1	sp|P45952|ACADM_MOUSE	46	0.00283948	0.00246354	0.00251156	0.00231315	0.00301967	0.00274961	0.00318333	0.00315601	0.00253193	0.00302716
14-3-3 protein zeta/delta OS=Mus musculus OX=10090 GN=Ywhaz PE=1 SV=1	sp|P63101|1433Z_MOUSE	28	0.00285075	0.00101181	0.000945572	0.00165649	0.00262635	0.00253598	0.00254225	0.00326718	0.00161615	0.00274294
Golgin subfamily A member 4 OS=Mus musculus OX=10090 GN=Golga4 PE=1 SV=2	sp|Q91VW5|GOGA4_MOUSE	258	2.81258e-05	0.000898435	0.000998215	0.00108922	0	0.000335428	0.000354732	0.000246663	0.000753499	0.000234206
Pyruvate dehydrogenase E1 component subunit alpha, somatic form, mitochondrial OS=Mus musculus OX=10090 GN=Pdha1 PE=1 SV=1	sp|P35486|ODPA_MOUSE	43	0.00362823	0.00305468	0.00268678	0.00247453	0.00342036	0.00273503	0.00293245	0.00268246	0.00296106	0.00294257
Heat shock-related 70 kDa protein 2 OS=Mus musculus OX=10090 GN=Hspa2 PE=1 SV=2	sp|P17156|HSP72_MOUSE	70	0.00145129	0	0	0.00128621	0	0	0	0	0.000684376	0
Succinate dehydrogenase [ubiquinone] iron-sulfur subunit, mitochondrial OS=Mus musculus OX=10090 GN=Sdhb PE=1 SV=1	sp|Q9CQA3|SDHB_MOUSE	32	0.00362823	0.00321939	0.00315907	0.00358094	0.00400032	0.00360585	0.00374981	0.00323166	0.00339691	0.00364691
Progranulin OS=Mus musculus OX=10090 GN=Grn PE=1 SV=2	sp|P28798|GRN_MOUSE	63	0.000979045	0.00277992	0.00355306	0.00350786	0.00082141	0.00126799	0.00112989	0.00142051	0.00270497	0.00115995
Hemoglobin subunit alpha OS=Mus musculus OX=10090 GN=Hba PE=1 SV=2	sp|P01942|HBA_MOUSE	15	0.00653081	0.00738314	0.00834396	0.00727556	0.00817087	0.00784041	0.010169	0.00901552	0.00738336	0.00879895
Long-chain-fatty-acid--CoA ligase 1 OS=Mus musculus OX=10090 GN=Acsl1 PE=1 SV=2	sp|P41216|ACSL1_MOUSE	78	0.000697736	0.00132078	0.00163547	0.00139915	0.0019205	0.00170691	0.00177305	0.00178475	0.00126328	0.0017963
Succinate--CoA ligase [ADP-forming] subunit beta, mitochondrial OS=Mus musculus OX=10090 GN=Sucla2 PE=1 SV=2	sp|Q9Z2I9|SUCB1_MOUSE	50	0.00203181	0.00164833	0.00192553	0.00223723	0.00256021	0.00244088	0.00264394	0.00230691	0.00196072	0.00248798
Long-chain specific acyl-CoA dehydrogenase, mitochondrial OS=Mus musculus OX=10090 GN=Acadl PE=1 SV=2	sp|P51174|ACADL_MOUSE	48	0.00219205	0.00187798	0.00210605	0.00164837	0.00306408	0.00254259	0.00271173	0.00265162	0.00195611	0.0027425
Sodium/potassium-transporting ATPase subunit alpha-1 OS=Mus musculus OX=10090 GN=Atp1a1 PE=1 SV=1	sp|Q8VDN2|AT1A1_MOUSE	113	0.000642164	0.000820518	0.0010011	0.000748481	0.00115694	0.00104076	0.00109789	0.00119675	0.000803067	0.00112309
Alpha-actinin-2 OS=Mus musculus OX=10090 GN=Actn2 PE=1 SV=2	sp|Q9JI91|ACTN2_MOUSE	104	0.0013257	0.00136205	0.000925735	0.000996891	0.00172845	0.000874792	0.000684451	0.00122383	0.00115259	0.00112788
Cytochrome b-c1 complex subunit 1, mitochondrial OS=Mus musculus OX=10090 GN=Uqcrc1 PE=1 SV=2	sp|Q9CZ13|QCR1_MOUSE	53	0.00198526	0.00184659	0.00213443	0.00185321	0.00241529	0.00221899	0.00234079	0.00232642	0.00195487	0.00232537
Elongation factor 1-alpha 1 OS=Mus musculus OX=10090 GN=Eef1a1 PE=1 SV=3	sp|P10126|EF1A1_MOUSE	50	0.00108847	0.000824164	0	0.000436533	0.000272362	0	0	0.000676164	0.000587291	0.000237132
ATP synthase subunit d, mitochondrial OS=Mus musculus OX=10090 GN=Atp5pd PE=1 SV=3	sp|Q9DCX2|ATP5H_MOUSE	19	0.00611069	0.00515103	0.00570058	0.00588746	0.0055906	0.00595622	0.00685068	0.0054428	0.00571244	0.00596008
14-3-3 protein gamma OS=Mus musculus OX=10090 GN=Ywhag PE=1 SV=2	sp|P61982|1433G_MOUSE	28	0.00259159	0.00110379	0.000945572	0.00116929	0.00233453	0.00340773	0.00254225	0.00284102	0.00145256	0.00278138
NADH dehydrogenase [ubiquinone] 1 alpha subcomplex subunit 10, mitochondrial OS=Mus musculus OX=10090 GN=Ndufa10 PE=1 SV=1	sp|Q99LC3|NDUAA_MOUSE	41	0.00230083	0.00188452	0.0022895	0.00226252	0.00225861	0.00194838	0.00228182	0.00194021	0.00218434	0.00210726
Cytochrome c1, heme protein, mitochondrial OS=Mus musculus OX=10090 GN=Cyc1 PE=1 SV=1	sp|Q9D0M3|CY1_MOUSE	35	0.00300624	0.00228117	0.00192553	0.00249448	0.00256799	0.00304318	0.00337029	0.00392061	0.00242685	0.00322552
NADH dehydrogenase [ubiquinone] iron-sulfur protein 5 OS=Mus musculus OX=10090 GN=Ndufs5 PE=1 SV=3	sp|Q99LY9|NDUS5_MOUSE	13	0.0133965	0.00970771	0.00870191	0.00881462	0.00858989	0.0058035	0.00594494	0.00642509	0.0101552	0.00669085
Sarcalumenin OS=Mus musculus OX=10090 GN=Srl PE=1 SV=2	sp|Q7TQ48|SRCA_MOUSE	54	0.0012766	0.00128776	0.00147089	0.00146522	0.00196706	0.00189025	0.00225977	0.0018414	0.00137512	0.00198962
Calcium-binding mitochondrial carrier protein Aralar1 OS=Mus musculus OX=10090 GN=Slc25a12 PE=1 SV=1	sp|Q8BH59|CMC1_MOUSE	75	0.000628892	0.00120191	0.00141205	0.00116409	0.00156154	0.00142015	0.00162704	0.00132581	0.00110174	0.00148364
Heat shock protein HSP 90-beta OS=Mus musculus OX=10090 GN=Hsp90ab1 PE=1 SV=3	sp|P11499|HS90B_MOUSE	83	0.00074313	0.000961939	0.000985964	0.000690301	0.00101726	0.00112286	0.00129869	0.00191684	0.000845334	0.00133891
LIM domain-binding protein 3 OS=Mus musculus OX=10090 GN=Ldb3 PE=1 SV=1	sp|Q9JKS4|LDB3_MOUSE	76	0.000811577	0.00128776	0.00133013	0.00114877	0.00172018	0.00122628	0.00149859	0.00149154	0.00114456	0.00148415
Hemoglobin subunit beta-1 OS=Mus musculus OX=10090 GN=Hbb-b1 PE=1 SV=2	sp|P02088|HBB1_MOUSE	16	0.00476205	0.00450715	0.00601728	0.00511563	0.00595793	0.00637958	0.00711829	0.00745769	0.00510052	0.00672837
Ubiquitin-40S ribosomal protein S27a OS=Mus musculus OX=10090 GN=Rps27a PE=1 SV=2	sp|P62983|RS27A_MOUSE	18	0.00423293	0.00257551	0.00320921	0.00227361	0.00438806	0.00209571	0.00282472	0.00220969	0.00307282	0.00287954
Fructose-bisphosphate aldolase A OS=Mus musculus OX=10090 GN=Aldoa PE=1 SV=2	sp|P05064|ALDOA_MOUSE	39	0.00241882	0.00191513	0.00166632	0.00153906	0.00216493	0.00233278	0.00260743	0.00295758	0.00188483	0.00251568
Tropomyosin alpha-1 chain OS=Mus musculus OX=10090 GN=Tpm1 PE=1 SV=1	sp|P58771|TPM1_MOUSE	33	0.00516747	0.00382425	0.0013858	0.00272833	0.0033839	0.00188278	0.00110934	0.00277215	0.00327646	0.00228704
Dihydrolipoyllysine-residue acetyltransferase component of pyruvate dehydrogenase complex, mitochondrial OS=Mus musculus OX=10090 GN=Dlat PE=1 SV=2	sp|Q8BMF4|ODP2_MOUSE	68	0.00128055	0.000984755	0.00134504	0.00132404	0.00164218	0.00140318	0.00146553	0.00111134	0.0012336	0.00140556
60 kDa heat shock protein, mitochondrial OS=Mus musculus OX=10090 GN=Hspd1 PE=1 SV=1	sp|P63038|CH60_MOUSE	61	0.000773228	0.00139331	0.0013021	0.000939262	0.00191993	0.00163696	0.00173373	0.00192351	0.00110198	0.00180353
Alpha-enolase OS=Mus musculus OX=10090 GN=Eno1 PE=1 SV=3	sp|P17182|ENOA_MOUSE	47	0.00162112	0.000931569	0.00107543	0.00116099	0.00150669	0.00103867	0.00129817	0.00177715	0.00119728	0.00140517
NADH dehydrogenase [ubiquinone] 1 alpha subcomplex subunit 12 OS=Mus musculus OX=10090 GN=Ndufa12 PE=1 SV=2	sp|Q7TMF3|NDUAC_MOUSE	17	0.00469535	0.00424202	0.00481382	0.00465422	0.00544725	0.00613484	0.00574249	0.00573218	0.00460135	0.00576419
Alpha-crystallin B chain OS=Mus musculus OX=10090 GN=Cryab PE=1 SV=2	sp|P23927|CRYAB_MOUSE	20	0.00507952	0.00386327	0.00300864	0.00422892	0.00449398	0.00399417	0.0039659	0.00407687	0.00404509	0.00413273
Fibronectin OS=Mus musculus OX=10090 GN=Fn1 PE=1 SV=4	sp|P11276|FINC_MOUSE	273	0.000225933	0.000566047	0.000220413	0.000379768	0.000548715	0.000203204	0.000134096	0.000284102	0.00034804	0.00029253
Unconventional myosin-XVIIIa OS=Mus musculus OX=10090 GN=Myo18a PE=1 SV=2	sp|Q9JMH9|MY18A_MOUSE	233	0.00026472	0.000519524	0.000144621	0.000468383	0.000502643	0.000209518	0.000174575	0.000409693	0.000349312	0.000324107
Heat shock 70 kDa protein 1B OS=Mus musculus OX=10090 GN=Hspa1b PE=1 SV=3	sp|P17879|HS71B_MOUSE (+1)	70	0.000829309	0.000735861	0.000859611	0.000779524	0.000622543	0.000538896	0.000581085	0.000767077	0.000801076	0.0006274
Electron transfer flavoprotein subunit alpha, mitochondrial OS=Mus musculus OX=10090 GN=Etfa PE=1 SV=2	sp|Q99LC5|ETFA_MOUSE	35	0.00207327	0.00176607	0.00240691	0.00194881	0.00311271	0.00240918	0.00249866	0.00255692	0.00204876	0.00264437
Pyruvate dehydrogenase E1 component subunit beta, mitochondrial OS=Mus musculus OX=10090 GN=Pdhb PE=1 SV=1	sp|Q9D051|ODPB_MOUSE	39	0.00241882	0.00191513	0.00166632	0.00258842	0.00216493	0.00176381	0.00229454	0.00219269	0.00214717	0.00210399
Electron transfer flavoprotein subunit beta OS=Mus musculus OX=10090 GN=Etfb PE=1 SV=3	sp|Q9DCW4|ETFB_MOUSE	28	0.00323949	0.00248353	0.00249287	0.0031181	0.00262635	0.00324923	0.00341387	0.00255692	0.0028335	0.00296159
Myosin-14 OS=Mus musculus OX=10090 GN=Myh14 PE=1 SV=1	sp|Q6URW6|MYH14_MOUSE	229	3.16876e-05	0.000269923	0.000178679	0	0.000249765	0.000193798	0	0.00019974	0.000120072	0.000160826
Leucine-rich PPR motif-containing protein, mitochondrial OS=Mus musculus OX=10090 GN=Lrpprc PE=1 SV=2	sp|Q6PB66|LPPRC_MOUSE	157	0.000300426	0.00054135	0.000398597	0.000538716	0.00050309	0.000480545	0.00059589	0.000506679	0.000444772	0.000521551
Dihydrolipoyllysine-residue succinyltransferase component of 2-oxoglutarate dehydrogenase complex, mitochondrial OS=Mus musculus OX=10090 GN=Dlst PE=1 SV=1	sp|Q9D2G2|ODO2_MOUSE	49	0.00111068	0.00105123	0.00103153	0.00122497	0.00183428	0.0015397	0.00195078	0.00194813	0.0011046	0.00181822
Annexin A2 OS=Mus musculus OX=10090 GN=Anxa2 PE=1 SV=2	sp|P07356|ANXA2_MOUSE	39	0.00409338	0.00211324	0.0019749	0.00223863	0.00279346	0.00136553	0.00104297	0.000611913	0.00260504	0.00145347
Isocitrate dehydrogenase [NAD] subunit alpha, mitochondrial OS=Mus musculus OX=10090 GN=Idh3a PE=1 SV=1	sp|Q9D6R2|IDH3A_MOUSE	40	0.001542	0.00135214	0.00138397	0.00150058	0.00170226	0.00155329	0.00183042	0.00208815	0.00144467	0.00179353
PDZ and LIM domain protein 5 OS=Mus musculus OX=10090 GN=Pdlim5 PE=1 SV=4	sp|Q8CI51|PDLI5_MOUSE	63	0.001267	0.00118555	0.00114615	0.00134251	0.00103757	0.0011271	0.00122673	0.00110484	0.0012353	0.00112406
NADH dehydrogenase [ubiquinone] 1 alpha subcomplex subunit 9, mitochondrial OS=Mus musculus OX=10090 GN=Ndufa9 PE=1 SV=2	sp|Q9DC69|NDUA9_MOUSE	43	0.00194068	0.0013177	0.00156729	0.00196694	0.00228024	0.00165134	0.00175001	0.00194247	0.00169815	0.00190601
Ig heavy chain V region AC38 205.12 OS=Mus musculus OX=10090 PE=1 SV=1	sp|P06330|HVM51_MOUSE	13	0.00362823	0.00950959	0.00610985	0.00419744	0.00209509	0.00785179	0.00500627	0.00474232	0.00586128	0.00492387
Alpha-actinin-4 OS=Mus musculus OX=10090 GN=Actn4 PE=1 SV=1	sp|P57780|ACTN4_MOUSE	105	0.000172773	0.000392459	0.000320921	0.000207873	0.000648482	0.00103553	0.000949105	0.00121217	0.000273507	0.000961321
Cysteine-rich protein 2 OS=Mus musculus OX=10090 GN=Crip2 PE=1 SV=1	sp|Q9DCT8|CRIP2_MOUSE	23	0.00252398	0.0021276	0.00219761	0.00272833	0.00201311	0.00144716	0.00159167	0.00164285	0.00239438	0.0016737
40S ribosomal protein S18 OS=Mus musculus OX=10090 GN=Rps18 PE=1 SV=3	sp|P62270|RS18_MOUSE	18	0.00463607	0.00386327	0.00280806	0.00318306	0.00438806	0.00369831	0.0030507	0.00342501	0.00362261	0.00364052
Calcium-binding mitochondrial carrier protein Aralar2 OS=Mus musculus OX=10090 GN=Slc25a13 PE=1 SV=1	sp|Q9QXX4|CMC2_MOUSE	74	0.00029418	0.000870106	0.000650516	0.000774257	0.00110417	0.000839616	0.00107187	0.000779362	0.000647265	0.000948754
NADH dehydrogenase [ubiquinone] 1 alpha subcomplex subunit 7 OS=Mus musculus OX=10090 GN=Ndufa7 PE=1 SV=3	sp|Q9Z1P6|NDUA7_MOUSE	13	0.00614007	0.00495291	0.00536926	0.00503692	0.00628528	0.00648626	0.00594494	0.00443637	0.00537479	0.00578822
NADH dehydrogenase [ubiquinone] flavoprotein 1, mitochondrial OS=Mus musculus OX=10090 GN=Ndufv1 PE=1 SV=1	sp|Q91YT0|NDUV1_MOUSE	51	0.00142283	0.000757504	0.00113266	0.00139092	0.00133511	0.00160985	0.00135586	0.00128682	0.00117598	0.00139691
Hexokinase-2 OS=Mus musculus OX=10090 GN=Hk2 PE=1 SV=1	sp|O08528|HXK2_MOUSE	103	0.000563608	0.000575115	0.00072441	0.000503285	0.000872617	0.000624763	0.000710842	0.00065647	0.000591604	0.000716173
Tubulin beta-4B chain OS=Mus musculus OX=10090 GN=Tubb4b PE=1 SV=1	sp|P68372|TBB4B_MOUSE	50	0.00195924	0.000721144	0.00052952	0.000873067	0.00174312	0.00155329	0.00126095	0.00226714	0.00102074	0.00170612
Tubulin alpha-1B chain OS=Mus musculus OX=10090 GN=Tuba1b PE=1 SV=2	sp|P05213|TBA1B_MOUSE (+1)	50	0.00246719	0.000669634	0.000770211	0.0004911	0.00136181	0.00115387	0.00130163	0.00182962	0.00109953	0.00141173
14-3-3 protein epsilon OS=Mus musculus OX=10090 GN=Ywhae PE=1 SV=1	sp|P62259|1433E_MOUSE	29	0.001126	0.000355243	0.000580978	0.000564483	0.00140877	0.0022955	0.00231432	0.00288021	0.000656676	0.0022247
Myosin light chain 3 OS=Mus musculus OX=10090 GN=Myl3 PE=1 SV=4	sp|P09542|MYL3_MOUSE	22	0.00379314	0.00362913	0.00142227	0.00347242	0.00371403	0.00292503	0.0010169	0.0023503	0.00307924	0.00250156
Mitochondrial 2-oxoglutarate/malate carrier protein OS=Mus musculus OX=10090 GN=Slc25a11 PE=1 SV=3	sp|Q9CR62|M2OM_MOUSE	34	0.00106713	0.000833255	0.00141583	0.000802451	0.00160213	0.00287163	0.0023927	0.00175475	0.00102967	0.0021553
Protein SGT1 homolog OS=Mus musculus OX=10090 GN=Sugt1 PE=1 SV=3	sp|Q9CX34|SGT1_MOUSE	38	0	0	0	0	0.00293865	0.00303651	0.00278309	0.00298308	0	0.00293533
Cytochrome b-c1 complex subunit 8 OS=Mus musculus OX=10090 GN=Uqcrq PE=1 SV=3	sp|Q9CQ69|QCR8_MOUSE	10	0.00725645	0.00540858	0.0055359	0.00600233	0.00708142	0.00665696	0.00589801	0.00517066	0.00605081	0.00620176
Enoyl-CoA delta isomerase 1, mitochondrial OS=Mus musculus OX=10090 GN=Eci1 PE=1 SV=2	sp|P42125|ECI1_MOUSE	32	0.00226764	0.00233406	0.00172997	0.00221677	0.00204272	0.0015949	0.00209735	0.00198872	0.00213711	0.00193092
Titin OS=Mus musculus OX=10090 GN=Ttn PE=1 SV=1	sp|A2ASS6|TITIN_MOUSE	3906	6.5022e-06	9.89061e-06	4.31346e-06	7.68348e-06	1.74323e-05	4.54477e-06	4.68617e-06	6.10973e-06	7.09744e-06	8.19324e-06
Complement C3 OS=Mus musculus OX=10090 GN=C3 PE=1 SV=3	sp|P01027|CO3_MOUSE	186	9.75329e-05	0.000193856	0.000375271	0.000264032	0.000219647	4.77201e-05	0.000131213	0.000213841	0.000232673	0.000153105
Cytochrome c oxidase subunit NDUFA4 OS=Mus musculus OX=10090 GN=Ndufa4 PE=1 SV=2	sp|Q62425|NDUA4_MOUSE	9	0.00806272	0.00515103	0.00561613	0.00485037	0.007263	0.00788973	0.0070053	0.00574518	0.00592006	0.0069758
Dihydrolipoyl dehydrogenase, mitochondrial OS=Mus musculus OX=10090 GN=Dld PE=1 SV=2	sp|O08749|DLDH_MOUSE	54	0.000873462	0.000858505	0.00111431	0.000808395	0.00146269	0.00123277	0.00158184	0.00125216	0.000913668	0.00138236
Creatine kinase M-type OS=Mus musculus OX=10090 GN=Ckm PE=1 SV=1	sp|P07310|KCRM_MOUSE	43	0.00109691	0.00113802	0.00106352	0.000951744	0.00133014	0.0012385	0.00113514	0.00101748	0.00106255	0.00118032
14-3-3 protein eta OS=Mus musculus OX=10090 GN=Ywhah PE=1 SV=2	sp|P68510|1433F_MOUSE	28	0	0	0	0	0	0.00118874	0	0.00113641	0	0.000581288
Triosephosphate isomerase OS=Mus musculus OX=10090 GN=Tpi1 PE=1 SV=5	sp|P17751|TPIS_MOUSE	27	0.00349385	0.00209857	0.00294178	0.00222309	0.00262275	0.00189025	0.00188315	0.00191506	0.00268932	0.0020778
Cytochrome c oxidase subunit 4 isoform 1, mitochondrial OS=Mus musculus OX=10090 GN=Cox4i1 PE=1 SV=2	sp|P19783|COX41_MOUSE	20	0.00290258	0.00321939	0.00276795	0.00190983	0.00313217	0.00377227	0.00325407	0.00308251	0.00269994	0.00331026
Cullin-1 OS=Mus musculus OX=10090 GN=Cul1 PE=1 SV=1	sp|Q9WTX6|CUL1_MOUSE	90	0.000524077	0.000915738	0.00109648	0.000727556	0.0004842	0.000493108	0.000632737	0.000441937	0.000815963	0.000512995
Tubulin alpha-4A chain OS=Mus musculus OX=10090 GN=Tuba4a PE=1 SV=1	sp|P68368|TBA4A_MOUSE	50	0.00203181	0	0	0.000545667	0	0.000576936	0	0.000477292	0.000644368	0.000263557
Malate dehydrogenase, mitochondrial OS=Mus musculus OX=10090 GN=Mdh2 PE=1 SV=3	sp|P08249|MDHM_MOUSE	36	0.00131019	0.00128776	0.00167147	0.00197046	0.00249665	0.0016026	0.00169483	0.00193347	0.00155997	0.00193189
Methylcrotonoyl-CoA carboxylase subunit alpha, mitochondrial OS=Mus musculus OX=10090 GN=Mccc1 PE=1 SV=2	sp|Q99MR8|MCCA_MOUSE	79	0.000137781	0.000619427	0.000517943	0.000552574	0.000930859	0.000758387	0.000875305	0.000805556	0.000456931	0.000842527
Caveolae-associated protein 1 OS=Mus musculus OX=10090 GN=Cavin1 PE=1 SV=1	sp|O54724|CAVN1_MOUSE	44	0.00156673	0.00134629	0.00114875	0.00111614	0.00154751	0.000706041	0.00157157	0.00131075	0.00129448	0.00128397
14-3-3 protein sigma OS=Mus musculus OX=10090 GN=Sfn PE=1 SV=2	sp|O70456|1433S_MOUSE	28	0.00220285	0.000551896	0	0.00107185	0	0	0	0	0.000956648	0
Tubulin beta-5 chain OS=Mus musculus OX=10090 GN=Tubb5 PE=1 SV=1	sp|P99024|TBB5_MOUSE	50	0.000725645	0	0.000433244	0.000545667	0	0.000843214	0	0.000835261	0.000426139	0.000419619
Protein NipSnap homolog 2 OS=Mus musculus OX=10090 GN=Nipsnap2 PE=1 SV=1	sp|O55126|NIPS2_MOUSE	33	0.00164919	0.00124873	0.00167754	0.00190157	0.00222842	0.00134484	0.00147912	0.0015066	0.00161926	0.00163975
Desmin OS=Mus musculus OX=10090 GN=Des PE=1 SV=3	sp|P31001|DESM_MOUSE	53	0.00109531	0.000874703	0.000363307	0.000566258	0.00138751	0.000586147	0.000383735	0.000562844	0.000724895	0.000730058
NADH dehydrogenase [ubiquinone] iron-sulfur protein 2, mitochondrial OS=Mus musculus OX=10090 GN=Ndufs2 PE=1 SV=1	sp|Q91WD5|NDUS2_MOUSE	53	0.000821485	0.000583135	0.000908268	0.000823648	0.00123334	0.00121416	0.0013047	0.0013133	0.000784134	0.00126638
Hydroxyacyl-coenzyme A dehydrogenase, mitochondrial OS=Mus musculus OX=10090 GN=Hadh PE=1 SV=2	sp|Q61425|HCDH_MOUSE	34	0.0017074	0.00143926	0.00155741	0.00168515	0.00224298	0.00156634	0.00167489	0.00157928	0.0015973	0.00176587
ATP synthase subunit e, mitochondrial OS=Mus musculus OX=10090 GN=Atp5me PE=1 SV=2	sp|Q06185|ATP5I_MOUSE	8	0.00725645	0.00611685	0.00782246	0.00682083	0.00680906	0.00804382	0.00483027	0.00596615	0.00700415	0.00641232
Calsequestrin-2 OS=Mus musculus OX=10090 GN=Casq2 PE=1 SV=3	sp|O09161|CASQ2_MOUSE	48	0.000680292	0.000697535	0.000651872	0.000966285	0.00136181	0.00106326	0.00118638	0.00124295	0.000748996	0.0012136
Basement membrane-specific heparan sulfate proteoglycan core protein OS=Mus musculus OX=10090 GN=Hspg2 PE=1 SV=1	sp|Q05793|PGBM_MOUSE	398	0.000109394	0.000187663	0.000108855	0.000157668	0.000246358	8.36301e-05	8.68707e-05	9.49387e-05	0.000140895	0.000127949
NADH dehydrogenase [ubiquinone] 1 alpha subcomplex subunit 8 OS=Mus musculus OX=10090 GN=Ndufa8 PE=1 SV=3	sp|Q9DCJ5|NDUA8_MOUSE	20	0.00235835	0.00321939	0.00276795	0.00204625	0.0021789	0.00277373	0.00223718	0.0027842	0.00259798	0.0024935
40S ribosomal protein S19 OS=Mus musculus OX=10090 GN=Rps19 PE=1 SV=3	sp|Q9CZX8|RS19_MOUSE	16	0.00385499	0.00354133	0.0033095	0.0040925	0.00374498	0.00263504	0.00330492	0.00223731	0.00369958	0.00298056
Sodium/potassium-transporting ATPase subunit alpha-2 OS=Mus musculus OX=10090 GN=Atp1a2 PE=1 SV=1	sp|Q6PIE5|AT1A2_MOUSE	112	0	0	0.000322354	0	0	0.000277373	0.000290542	0.000301859	8.05885e-05	0.000217444
Tubulin beta-2A chain OS=Mus musculus OX=10090 GN=Tubb2a PE=1 SV=1	sp|Q7TMM9|TBB2A_MOUSE	50	0.000725645	0	0	0	0	0	0	0	0.000181411	0
Ig kappa chain V-V region HP R16.7 OS=Mus musculus OX=10090 PE=1 SV=1	sp|P01644|KV5AB_MOUSE (+1)	12	0.00272117	0.00472178	0.00361037	0.00477458	0.00272362	0.00406814	0.0030507	0.00348025	0.00395697	0.00333068
Protein 4.1 OS=Mus musculus OX=10090 GN=Epb41 PE=1 SV=2	sp|P48193|EPB41_MOUSE	96	0.000529116	0.000804848	0.000325936	0.000511563	0.000992988	0.000300488	0.000169483	0.000621474	0.000542866	0.000521108
Heat shock 70 kDa protein 4 OS=Mus musculus OX=10090 GN=Hspa4 PE=1 SV=1	sp|Q61316|HSP74_MOUSE	94	0.000501776	0.000657578	0.000665741	0.000638546	0.00049257	0.000306881	0.000497631	0.000444288	0.00061591	0.000435343
L-lactate dehydrogenase B chain OS=Mus musculus OX=10090 GN=Ldhb PE=1 SV=2	sp|P16125|LDHB_MOUSE	37	0.00117672	0.000765693	0.00130103	0.00103234	0.00139862	0.00101953	0.00115432	0.00134373	0.00106895	0.00122905
Heat shock protein HSP 90-alpha OS=Mus musculus OX=10090 GN=Hsp90aa1 PE=1 SV=4	sp|P07901|HS90A_MOUSE	85	8.537e-05	0.000333302	0.000311483	0.000256784	0	0.000313268	0.000334978	0.000865677	0.000246735	0.000378481
Elongation factor 2 OS=Mus musculus OX=10090 GN=Eef2 PE=1 SV=2	sp|P58252|EF2_MOUSE	95	0.000687453	0.000596435	0.00055739	0.000201035	0.000458716	0.000397082	0.000449576	0.000690817	0.000510578	0.000499048
Filamin-C OS=Mus musculus OX=10090 GN=Flnc PE=1 SV=3	sp|Q8VHX6|FLNC_MOUSE	291	0.000149618	0.000141609	0.000148881	0.00019689	0.000308865	0.000205885	0.000111824	8.8843e-05	0.000159249	0.000178854
Isocitrate dehydrogenase [NAD] subunit gamma 1, mitochondrial OS=Mus musculus OX=10090 GN=Idh3g PE=1 SV=1	sp|P70404|IDHG1_MOUSE	43	0.00101253	0.000778644	0.00117547	0.000888295	0.00139348	0.00113529	0.00137163	0.00124873	0.000963734	0.00128728
Myosin regulatory light chain 2, ventricular/cardiac muscle isoform OS=Mus musculus OX=10090 GN=Myl2 PE=1 SV=3	sp|P51667|MLRV_MOUSE	19	0.00362823	0.00271107	0.00228023	0.00244114	0.00286697	0.00303651	0.00214084	0.00198872	0.00276517	0.00250826
F-box/WD repeat-containing protein 5 OS=Mus musculus OX=10090 GN=Fbxw5 PE=1 SV=1	sp|Q9QXW2|FBXW5_MOUSE	65	0.000334913	0.00110945	0.000814647	0.000923436	0.00067043	0.000512074	0.000594494	0.000520126	0.000795612	0.000574281
Protein-glutamine gamma-glutamyltransferase K OS=Mus musculus OX=10090 GN=Tgm1 PE=1 SV=2	sp|Q9JLF6|TGM1_MOUSE	90	0.000846586	0.000715421	0.000722073	0.000515352	0.000574987	0.000517763	0.000135586	0.000110484	0.000699858	0.000334705
Y-box-binding protein 1 OS=Mus musculus OX=10090 GN=Ybx1 PE=1 SV=3	sp|P62960|YBOX1_MOUSE	36	0.00131019	0.000786963	0.00187204	0.00136417	0.00128616	0.00117113	0.00152535	0.00138105	0.00133334	0.00134092
Desmoglein-1-beta OS=Mus musculus OX=10090 GN=Dsg1b PE=1 SV=1	sp|Q7TSF1|DSG1B_MOUSE	114	0.000668357	0.00020333	0.000485605	0.000574386	0.000692852	0.000389296	0.000107042	6.97795e-05	0.00048292	0.000314742
Protein-glutamine gamma-glutamyltransferase 2 OS=Mus musculus OX=10090 GN=Tgm2 PE=1 SV=4	sp|P21981|TGM2_MOUSE	77	0.000282719	0.000668965	0.00043762	0.000566926	0.000884293	0.00057636	0.000422607	0.000568205	0.000489058	0.000612866
Cytochrome c oxidase subunit 6C OS=Mus musculus OX=10090 GN=Cox6c PE=1 SV=3	sp|Q9CPQ1|COX6C_MOUSE	8	0.00544234	0.00547297	0.00601728	0.00545667	0.00748996	0.00665696	0.00610139	0.00522038	0.00559731	0.00636717
40S ribosomal protein S4, X isoform OS=Mus musculus OX=10090 GN=Rps4x PE=1 SV=2	sp|P62702|RS4X_MOUSE	30	0.00181411	0.00137361	0.00152438	0.00127322	0.00163417	0.00118346	0.0010169	0.00145839	0.00149633	0.00132323
NADH dehydrogenase [ubiquinone] 1 alpha subcomplex subunit 6 OS=Mus musculus OX=10090 GN=Ndufa6 PE=1 SV=1	sp|Q9CQZ5|NDUA6_MOUSE	15	0.00290258	0.00257551	0.00208599	0.00236456	0.00381307	0.00369831	0.00366083	0.00304937	0.00248216	0.0035554
Fibrillin-1 OS=Mus musculus OX=10090 GN=Fbn1 PE=1 SV=2	sp|Q61554|FBN1_MOUSE	312	0.000127918	0.00030543	3.85723e-05	0.000201127	0.000279346	8.53456e-05	0	0.000184849	0.000168262	0.000137385
Apoptosis-inducing factor 1, mitochondrial OS=Mus musculus OX=10090 GN=Aifm1 PE=1 SV=1	sp|Q9Z0X1|AIFM1_MOUSE	67	0.000324916	0.000615048	0.000790329	0.000651542	0.000772371	0.00079486	0.000667814	0.000682694	0.000595459	0.000729435
NADH dehydrogenase [ubiquinone] iron-sulfur protein 7, mitochondrial OS=Mus musculus OX=10090 GN=Ndufs7 PE=1 SV=1	sp|Q9DC70|NDUS7_MOUSE	25	0.00159642	0.00144229	0.00134787	0.00185527	0.00174312	0.00115387	0.00146433	0.00127278	0.00156046	0.00140853
Mitochondrial carnitine/acylcarnitine carrier protein OS=Mus musculus OX=10090 GN=Slc25a20 PE=1 SV=1	sp|Q9Z2Z6|MCAT_MOUSE	33	0.00153925	0.00109264	0.00109405	0.00140551	0.00148561	0.00100863	0.00141749	0.00108475	0.00128286	0.00124912
Ig kappa chain V19-17 OS=Mus musculus OX=10090 GN=Igk-V19-17 PE=1 SV=1	sp|P01633|KV5A1_MOUSE	16	0.00204088	0.0016097	0.00135389	0.00238729	0.00119159	0.00166424	0.00127112	0.00174013	0.00184794	0.00146677
Pyruvate kinase PKM OS=Mus musculus OX=10090 GN=Pkm PE=1 SV=4	sp|P52480|KPYM_MOUSE	58	0.00106345	0.000444054	0.000331988	0.000282241	0.000328713	0.000306067	0.00038572	0.00096007	0.000530432	0.000495143
Myomesin-1 OS=Mus musculus OX=10090 GN=Myom1 PE=1 SV=2	sp|Q62234|MYOM1_MOUSE	185	5.88361e-05	0.000153139	0.000169134	0.000221216	0.000279723	0.000203907	0.000274837	0.000365494	0.000150581	0.00028099
Keratin, type II cuticular Hb2 OS=Mus musculus OX=10090 GN=Krt82 PE=1 SV=2	sp|Q99M74|KRT82_MOUSE	57	0.00133671	0.000587398	0.000464492	0.000670117	0.000764526	0.000583943	0.000107042	0.000279118	0.00076468	0.000433657
Myosin light polypeptide 6 OS=Mus musculus OX=10090 GN=Myl6 PE=1 SV=3	sp|Q60605|MYL6_MOUSE	17	0.0042685	0.00348452	0.00127425	0.00192588	0.00272362	0.0018274	0.00107672	0.00327553	0.00273829	0.00222582
Serine/arginine repetitive matrix protein 2 OS=Mus musculus OX=10090 GN=Srrm2 PE=1 SV=3	sp|Q8BTI8|SRRM2_MOUSE	295	0	0	4.07951e-05	0	0	0	0	0	1.01988e-05	0
Hexokinase-1 OS=Mus musculus OX=10090 GN=Hk1 PE=1 SV=3	sp|P17710|HXK1_MOUSE	108	0.000470325	0.000214626	0.000423438	0.000277886	0.0004035	0.0002671	0.000414292	0.000386695	0.000346569	0.000367897
Histone H4 OS=Mus musculus OX=10090 GN=H4c1 PE=1 SV=2	sp|P62806|H4_MOUSE	11	0.010225	0.00257551	0.00284453	0.00297636	0.00297123	0.00403452	0.00147912	0.00361585	0.00465535	0.00302518
Alpha-actinin-1 OS=Mus musculus OX=10090 GN=Actn1 PE=1 SV=1	sp|Q7TPR4|ACTN1_MOUSE	103	0	0	0	0	0	0	0.000414658	0.000444082	0	0.000214685
Kinesin-like protein KIF27 OS=Mus musculus OX=10090 GN=Kif27 PE=1 SV=1	sp|Q7M6Z4|KIF27_MOUSE	159	0.000273828	0.000145784	0.000105965	0.000188753	0.000239816	5.58235e-05	5.11647e-05	0	0.000178582	8.6701e-05
NADH dehydrogenase [ubiquinone] 1 alpha subcomplex subunit 13 OS=Mus musculus OX=10090 GN=Ndufa13 PE=1 SV=3	sp|Q9ERS2|NDUAD_MOUSE	17	0.0025611	0.00166651	0.00127425	0.00176539	0.00256341	0.00300216	0.00251234	0.00175475	0.00181681	0.00245816
Tripartite motif-containing protein 72 OS=Mus musculus OX=10090 GN=Trim72 PE=1 SV=1	sp|Q1XH17|TRI72_MOUSE	53	0.00116377	0.000534541	0.000499548	0.000566258	0.00102778	0.000544279	0.000767471	0.000712936	0.000691029	0.000763117
Tropomyosin alpha-3 chain OS=Mus musculus OX=10090 GN=Tpm3 PE=1 SV=3	sp|P21107|TPM3_MOUSE	33	0.00087957	0	0	0	0	0	0	0.000421849	0.000219892	0.000105462
Propionyl-CoA carboxylase alpha chain, mitochondrial OS=Mus musculus OX=10090 GN=Pcca PE=1 SV=2	sp|Q91ZA3|PCCA_MOUSE	80	0	0.000289745	0.000481382	0.000477458	0.00057877	0.000499272	0.000635562	0.000522038	0.000312146	0.00055891
40S ribosomal protein S3a OS=Mus musculus OX=10090 GN=Rps3a PE=1 SV=3	sp|P97351|RS3A_MOUSE	30	0.00205599	0.00171701	0.00136392	0.00136417	0.00181575	0.000887594	0.00108469	0.000795487	0.00162527	0.00114588
Collagen alpha-1(VI) chain OS=Mus musculus OX=10090 GN=Col6a1 PE=1 SV=1	sp|Q04857|CO6A1_MOUSE	108	0.000403136	0.000500794	0.000245148	0.000404198	0.000706125	0.000226008	0.00013182	0.000313039	0.000388319	0.000344248
Aspartate aminotransferase, mitochondrial OS=Mus musculus OX=10090 GN=Got2 PE=1 SV=1	sp|P05202|AATM_MOUSE	47	0.000849159	0.000986367	0.000921796	0.000812695	0.000927191	0.000755399	0.000908718	0.000846263	0.000892504	0.000859393
Acetyl-coenzyme A synthetase 2-like, mitochondrial OS=Mus musculus OX=10090 GN=Acss1 PE=1 SV=1	sp|Q99NB1|ACS2L_MOUSE	75	0.000193505	0.000446422	0.000577659	0.000509289	0.00065367	0.000562143	0.000650815	0.000609873	0.000431719	0.000619125
Junctophilin-2 OS=Mus musculus OX=10090 GN=Jph2 PE=1 SV=2	sp|Q9ET78|JPH2_MOUSE	75	0.000435387	0.000549443	0.000641843	0.000509289	0.000544725	0.000414211	0.000433877	0.000556841	0.00053399	0.000487413
NADH dehydrogenase [ubiquinone] 1 alpha subcomplex subunit 2 OS=Mus musculus OX=10090 GN=Ndufa2 PE=1 SV=3	sp|Q9CQ75|NDUA2_MOUSE	11	0.00263871	0.00280965	0.00306334	0.0024803	0.00222842	0.00322761	0.00332803	0.00216951	0.002748	0.00273839
L-lactate dehydrogenase A chain OS=Mus musculus OX=10090 GN=Ldha PE=1 SV=3	sp|P06151|LDHA_MOUSE	36	0.00110862	0.000786963	0.000334293	0.000606296	0.000756562	0.000554746	0.000734427	0.000497179	0.000709044	0.000635729
SRA stem-loop-interacting RNA-binding protein, mitochondrial OS=Mus musculus OX=10090 GN=Slirp PE=1 SV=2	sp|Q9D8T7|SLIRP_MOUSE	13	0.00362823	0.00277363	0.0027772	0.00209872	0.00272362	0.00256037	0.00219024	0.00229467	0.00281944	0.00244223
Ig gamma-2A chain C region, membrane-bound form OS=Mus musculus OX=10090 GN=Igh-1a PE=1 SV=3	sp|P01865|GCAM_MOUSE	44	0	0	0	0	0	0.00035302	0.000462227	0.000271189	0	0.000271609
60S ribosomal protein L30 OS=Mus musculus OX=10090 GN=Rpl30 PE=1 SV=2	sp|P62889|RL30_MOUSE	13	0.00251185	0.00178305	0.0027772	0.00167897	0.00272362	0.00256037	0.00250313	0.00229467	0.00218777	0.00252045
MICOS complex subunit Mic19 OS=Mus musculus OX=10090 GN=Chchd3 PE=1 SV=1	sp|Q9CRB9|MIC19_MOUSE	26	0.00195366	0.00128776	0.00148118	0.0014691	0.00188559	0.000938801	0.00109512	0.000917869	0.00154792	0.00120934
Peroxiredoxin-1 OS=Mus musculus OX=10090 GN=Prdx1 PE=1 SV=1	sp|P35700|PRDX1_MOUSE	22	0.00247379	0.00128776	0.00175048	0.00124015	0.00210462	0.00151294	0.00110934	0.00135594	0.00168804	0.00152071
Cytochrome c oxidase subunit 5B, mitochondrial OS=Mus musculus OX=10090 GN=Cox5b PE=1 SV=1	sp|P19536|COX5B_MOUSE	14	0.00155495	0.00128776	0.00275076	0.00272833	0.00233453	0.00301148	0.00334124	0.00355128	0.00208045	0.00305963
Peroxiredoxin-6 OS=Mus musculus OX=10090 GN=Prdx6 PE=1 SV=3	sp|O08709|PRDX6_MOUSE	25	0.00217694	0.000824164	0.00192553	0.001637	0.00261468	0.000887594	0.00130163	0.000875035	0.00164091	0.00141973
Mitochondrial pyruvate carrier 2 OS=Mus musculus OX=10090 GN=Mpc2 PE=1 SV=1	sp|Q9D023|MPC2_MOUSE	14	0.00259159	0.00183965	0.00292268	0.00194881	0.00291817	0.00253598	0.00348651	0.00312513	0.00232568	0.00301645
Lon protease homolog, mitochondrial OS=Mus musculus OX=10090 GN=Lonp1 PE=1 SV=2	sp|Q8CGK3|LONM_MOUSE	106	0.000308057	0.000315865	0.000249774	0.00025739	0.00028264	0.000314007	0.000345362	0.000337707	0.000282771	0.000319929
Transitional endoplasmic reticulum ATPase OS=Mus musculus OX=10090 GN=Vcp PE=1 SV=4	sp|Q01853|TERA_MOUSE	89	0.0001223	0.000405137	0.000486791	0.000153277	0.000397833	0.000349054	0.000434181	0.000603319	0.000291876	0.000446097
NADH dehydrogenase [ubiquinone] 1 alpha subcomplex subunit 5 OS=Mus musculus OX=10090 GN=Ndufa5 PE=1 SV=3	sp|Q9CPP6|NDUA5_MOUSE	13	0.00195366	0.00138682	0.00296235	0.00104936	0.00314264	0.00324313	0.00265958	0.00260063	0.00183805	0.0029115
ATP-dependent 6-phosphofructokinase, liver type OS=Mus musculus OX=10090 GN=Pfkl PE=1 SV=4	sp|P12382|PFKAL_MOUSE	85	0	0	0	0	0.000256341	0.00018274	0.000191416	0.000187173	0	0.000204418
Troponin I, cardiac muscle OS=Mus musculus OX=10090 GN=Tnni3 PE=1 SV=2	sp|P48787|TNNI3_MOUSE	24	0.00151176	0.00214626	0.00110317	0.00136417	0.00204272	0.000739662	0.000677932	0.00132581	0.00153134	0.00119653
Nucleoside diphosphate kinase B OS=Mus musculus OX=10090 GN=Nme2 PE=1 SV=1	sp|Q01768|NDKB_MOUSE	17	0.00298795	0.00257551	0.001699	0.0016049	0.00208277	0.00208846	0.00227307	0.00187173	0.00221684	0.00207901
NADH dehydrogenase [ubiquinone] iron-sulfur protein 4, mitochondrial OS=Mus musculus OX=10090 GN=Ndufs4 PE=1 SV=3	sp|Q9CXZ1|NDUS4_MOUSE	20	0.000907056	0.00090143	0.00144415	0.000954917	0.000953268	0.000887594	0.0010169	0.00149154	0.00105189	0.00108732
Citrate synthase, mitochondrial OS=Mus musculus OX=10090 GN=Cs PE=1 SV=1	sp|Q9CZU6|CISY_MOUSE	52	0.000488415	0.000396233	0.000786875	0.000682083	0.000942793	0.000810783	0.000821341	0.000688402	0.000588401	0.00081583
Clathrin heavy chain 1 OS=Mus musculus OX=10090 GN=Cltc PE=1 SV=3	sp|Q68FD5|CLH1_MOUSE	192	0	0.000147555	5.0144e-05	0.000156311	0.000184412	0.00020803	0.000190668	0.0001968	8.85026e-05	0.000194978
Enoyl-CoA hydratase, mitochondrial OS=Mus musculus OX=10090 GN=Echs1 PE=1 SV=1	sp|Q8BH95|ECHM_MOUSE	31	0.0011704	0.000830811	0.000854065	0.00114414	0.00123002	0.000715802	0.000852883	0.00089813	0.000999853	0.000924209
Heat shock 70 kDa protein 4L OS=Mus musculus OX=10090 GN=Hspa4l PE=1 SV=2	sp|P48722|HS74L_MOUSE	94	0.000385981	0.000410986	0.000716952	0.000435372	0.000202823	0.000259668	0.000302906	0.000190409	0.000487323	0.000238952
Peroxiredoxin-2 OS=Mus musculus OX=10090 GN=Prdx2 PE=1 SV=3	sp|Q61171|PRDX2_MOUSE	22	0.00197903	0.00117069	0.00087524	0.00111614	0.00148561	0.00121036	0.000924453	0.000903962	0.00128527	0.0011311
Ig kappa chain V-III region PC 6684 OS=Mus musculus OX=10090 PE=1 SV=1	sp|P01670|KV3AI_MOUSE	12	0.00120941	0.00429252	0.00220634	0.00363778	0	0.00221899	0.00135586	0.00198872	0.00283651	0.00139089
Ig heavy chain V-III region J606 OS=Mus musculus OX=10090 PE=1 SV=1	sp|P01801|HVM32_MOUSE	13	0.000837283	0.0035661	0.00462867	0.00209872	0.00188559	0.00221899	0.00281603	0.00122383	0.00278269	0.00203611
Fatty acid-binding protein, heart OS=Mus musculus OX=10090 GN=Fabp3 PE=1 SV=5	sp|P11404|FABPH_MOUSE	15	0.00120941	0.00188871	0.00320921	0.001637	0.00181575	0.00236692	0.00162704	0.000795487	0.00198608	0.0016513
Superoxide dismutase [Mn], mitochondrial OS=Mus musculus OX=10090 GN=Sod2 PE=1 SV=3	sp|P09671|SODM_MOUSE	25	0.000870774	0.00113323	0.00125159	0.00109133	0.00163417	0.00133139	0.00154569	0.00119323	0.00108673	0.00142612
40S ribosomal protein S2 OS=Mus musculus OX=10090 GN=Rps2 PE=1 SV=3	sp|P25444|RS2_MOUSE	31	0.000702237	0.000913892	0.00108699	0.000792097	0.000615012	0.00100212	0.000984095	0.00089813	0.000873805	0.00087484
40S ribosomal protein S11 OS=Mus musculus OX=10090 GN=Rps11 PE=1 SV=3	sp|P62281|RS11_MOUSE	18	0.00201568	0.00200318	0.00213948	0.00121259	0.00181575	0.00147932	0.00158184	0.00198872	0.00184273	0.00171641
Pregnancy zone protein OS=Mus musculus OX=10090 GN=Pzp PE=1 SV=3	sp|Q61838|PZP_MOUSE	166	6.55703e-05	0	0.000130495	0.000312279	0.000180481	0.000106939	0.000196029	0.000287525	0.000127086	0.000192744
Voltage-dependent anion-selective channel protein 2 OS=Mus musculus OX=10090 GN=Vdac2 PE=1 SV=2	sp|Q60930|VDAC2_MOUSE	32	0.000453528	0.000563394	0.000451296	0.000596823	0.000936246	0.000693433	0.000699118	0.000745769	0.00051626	0.000768641
Plakophilin-1 OS=Mus musculus OX=10090 GN=Pkp1 PE=1 SV=1	sp|P97350|PKP1_MOUSE	81	0.000716686	0.000413354	0.00023772	0.000505247	0.000302625	0.000410923	5.02172e-05	7.36562e-05	0.000468252	0.000209355
Vinculin OS=Mus musculus OX=10090 GN=Vcl PE=1 SV=4	sp|Q64727|VINC_MOUSE	117	0.000217073	0.000506298	0.000144003	0.000139915	0.000419019	0.000189657	5.21486e-05	0.000322954	0.000251822	0.000245945
Carnitine O-acetyltransferase OS=Mus musculus OX=10090 GN=Crat PE=1 SV=3	sp|P47934|CACP_MOUSE	71	0.000153305	0.000435298	0.000542402	0.000345845	0.000345248	0.00028128	0.00040103	0.000336121	0.000369213	0.00034092
Ig heavy chain V region 441 OS=Mus musculus OX=10090 PE=4 SV=1	sp|P01806|HVM36_MOUSE (+2)	13	0.00167457	0.00158493	0.0027772	0.00230859	0.00188559	0.00102415	0.00250313	0.0013768	0.00208632	0.00169742
Cytochrome c oxidase subunit 2 OS=Mus musculus OX=10090 GN=Mtco2 PE=1 SV=1	sp|P00405|COX2_MOUSE	26	0.000837283	0.000891524	0.000833161	0.000734551	0.00167608	0.000853456	0.00148624	0.000917869	0.00082413	0.00123341
Bifunctional glutamate/proline--tRNA ligase OS=Mus musculus OX=10090 GN=Eprs1 PE=1 SV=4	sp|Q8CGC7|SYEP_MOUSE	170	0	9.09005e-05	5.66332e-05	9.62941e-05	0.000112149	0.000130529	0.000119635	0.000128682	6.0957e-05	0.000122749
60S ribosomal protein L26 OS=Mus musculus OX=10090 GN=Rpl26 PE=1 SV=1	sp|P61255|RL26_MOUSE	17	0.0008537	0.00136351	0.001699	0.00128392	0.00144192	0.0018274	0.00191416	0.00222268	0.00130003	0.00185154
Histone H3.3C OS=Mus musculus OX=10090 GN=H3-5 PE=3 SV=3	sp|P02301|H3C_MOUSE (+3)	15	0.0026607	0.00103021	0.000481382	0.00109133	0.00127102	0.00103553	0.00108469	0.00132581	0.0013159	0.00117926
Fatty acid-binding protein, adipocyte OS=Mus musculus OX=10090 GN=Fabp4 PE=1 SV=3	sp|P04117|FABP4_MOUSE	15	0.00193505	0.00154531	0.00224645	0.00200078	0.00181575	0.00236692	0.00189821	0.00159097	0.0019319	0.00191796
NADH dehydrogenase [ubiquinone] iron-sulfur protein 8, mitochondrial OS=Mus musculus OX=10090 GN=Ndufs8 PE=1 SV=1	sp|Q8K3J1|NDUS8_MOUSE	24	0.00151176	0.00107313	0.000802304	0.000795764	0.00158878	0.00110949	0.00177957	0.00124295	0.00104574	0.0014302
Protein phosphatase 1 regulatory subunit 3A OS=Mus musculus OX=10090 GN=Ppp1r3a PE=1 SV=2	sp|Q99MR9|PPR3A_MOUSE	121	0	0	0	0	0.000112546	0.000495145	0.000521055	0.000427328	0	0.000389019
40S ribosomal protein S16 OS=Mus musculus OX=10090 GN=Rps16 PE=1 SV=4	sp|P14131|RS16_MOUSE	16	0.00181411	0.00241454	0.00165475	0.00102313	0.00170226	0.00166424	0.0020338	0.00198872	0.00172663	0.00184725
CDGSH iron-sulfur domain-containing protein 1 OS=Mus musculus OX=10090 GN=Cisd1 PE=1 SV=1	sp|Q91WS0|CISD1_MOUSE	12	0.00332587	0.00257551	0.00200576	0.00227361	0.00317756	0.00332848	0.00288121	0.00182299	0.00254519	0.00280256
40S ribosomal protein S3 OS=Mus musculus OX=10090 GN=Rps3 PE=1 SV=1	sp|P62908|RS3_MOUSE	27	0.00161254	0.00124006	0.000713159	0.00151574	0.00141225	0.000821846	0.000753258	0.00095753	0.00127038	0.000986221
Ig lambda-1 chain C region OS=Mus musculus OX=10090 PE=1 SV=1	sp|P01843|LAC1_MOUSE	12	0.00181411	0.00171701	0.00320921	0.00363778	0.00113484	0.00110949	0.00271173	0.00215444	0.00259453	0.00177763
GrpE protein homolog 1, mitochondrial OS=Mus musculus OX=10090 GN=Grpel1 PE=1 SV=1	sp|Q99LP6|GRPE1_MOUSE	24	0.00151176	0.000858505	0.0017049	0.00170521	0.0014753	0.000739662	0.0010169	0.00107722	0.00144509	0.00107727
3-hydroxyacyl-CoA dehydrogenase type-2 OS=Mus musculus OX=10090 GN=Hsd17b10 PE=1 SV=4	sp|O08756|HCD2_MOUSE	27	0.000806272	0.000476947	0.000624014	0.000606296	0.00181575	0.000986216	0.00195847	0.00139947	0.000628382	0.00153998
60S ribosomal protein L6 OS=Mus musculus OX=10090 GN=Rpl6 PE=1 SV=3	sp|P47911|RL6_MOUSE	34	0.000533563	0.000984755	0.000920289	0.000882696	0.00104139	0.000522114	0.000897263	0.000760392	0.000830326	0.000805289
Histone H2B type 1-H OS=Mus musculus OX=10090 GN=H2bc9 PE=1 SV=3	sp|Q64478|H2B1H_MOUSE (+1)	14	0.00336907	0.00165569	0.00137538	0.00155905	0.00136181	0.00285298	0.000871627	0.00198872	0.00198979	0.00176878
60S ribosomal protein L8 OS=Mus musculus OX=10090 GN=Rpl8 PE=1 SV=2	sp|P62918|RL8_MOUSE	28	0.00142537	0.00101181	0.000859611	0.00107185	0.00087545	0.000633996	0.00065372	0.000852307	0.00109216	0.000753868
NADH dehydrogenase [ubiquinone] flavoprotein 2, mitochondrial OS=Mus musculus OX=10090 GN=Ndufv2 PE=1 SV=2	sp|Q9D6J6|NDUV2_MOUSE	27	0.000671894	0.000667726	0.000980593	0.000505247	0.00141225	0.0010684	0.00135586	0.00110484	0.000706365	0.00123534
Ig kappa chain V-V region MOPC 173 OS=Mus musculus OX=10090 PE=1 SV=1	sp|P01643|KV5AA_MOUSE	12	0	0.00214626	0	0	0	0	0	0	0.000536565	0
NADH dehydrogenase [ubiquinone] 1 beta subcomplex subunit 4 OS=Mus musculus OX=10090 GN=Ndufb4 PE=1 SV=3	sp|Q9CQC7|NDUB4_MOUSE	15	0.00145129	0.00223211	0.00144415	0.00181889	0.0021789	0.00221899	0.00162704	0.00185614	0.00173661	0.00197026
ATP synthase subunit epsilon, mitochondrial OS=Mus musculus OX=10090 GN=Atp5f1e PE=1 SV=2	sp|P56382|ATP5E_MOUSE	6	0.00604704	0.00429252	0.00401152	0.00363778	0.00453937	0.00517763	0.00542346	0.00265162	0.00449722	0.00444802
Cytochrome c oxidase subunit 5A, mitochondrial OS=Mus musculus OX=10090 GN=Cox5a PE=1 SV=2	sp|P12787|COX5A_MOUSE	16	0.00226764	0.00177067	0.00135389	0.00136417	0.00170226	0.00152555	0.00165246	0.00111865	0.00168909	0.00149973
Ig kappa chain V-VI region TEPC 601/TEPC 191 OS=Mus musculus OX=10090 PE=1 SV=1	sp|P01677|KV6A3_MOUSE (+1)	12	0.00241882	0.00107313	0.00180518	0.00136417	0.00181575	0.00147932	0.00186431	0.00116008	0.00166532	0.00157987
Prelamin-A/C OS=Mus musculus OX=10090 GN=Lmna PE=1 SV=2	sp|P48678|LMNA_MOUSE	74	0.00151993	0.000417651	9.75775e-05	0.000147477	0.000588892	0.000119945	0	0.000456867	0.00054566	0.000291426
Protein-glutamine gamma-glutamyltransferase E OS=Mus musculus OX=10090 GN=Tgm3 PE=1 SV=2	sp|Q08189|TGM3_MOUSE	77	0.000141359	0.000100345	0.000281327	0	0.000424461	0	7.92388e-05	0	0.000130758	0.000125925
Acidic leucine-rich nuclear phosphoprotein 32 family member B OS=Mus musculus OX=10090 GN=Anp32b PE=1 SV=1	sp|Q9EST5|AN32B_MOUSE	31	0.00128743	0.000913892	0.00100935	0.000704086	0.00105431	0.000787382	0.000524851	0.000577369	0.000978691	0.000735977
Transcription factor A, mitochondrial OS=Mus musculus OX=10090 GN=Tfam PE=1 SV=2	sp|P40630|TFAM_MOUSE	28	0.00168453	0.00147172	0.00077365	0.000682083	0.00145908	0.000792495	0.00065372	0.000781282	0.001153	0.000921645
Peroxiredoxin-5, mitochondrial OS=Mus musculus OX=10090 GN=Prdx5 PE=1 SV=2	sp|P99029|PRDX5_MOUSE	22	0.00181411	0.00163896	0.00131286	0.000992121	0.00123801	0.00110949	0.00129423	0.00126555	0.00143951	0.00122682
Acidic leucine-rich nuclear phosphoprotein 32 family member A OS=Mus musculus OX=10090 GN=Anp32a PE=1 SV=1	sp|O35381|AN32A_MOUSE	29	0.00162645	0.000710487	0.000497982	0.000564483	0.000939181	0.000535617	0.000280524	0	0.000849849	0.00043883
Malate dehydrogenase, cytoplasmic OS=Mus musculus OX=10090 GN=Mdh1 PE=1 SV=3	sp|P14152|MDHC_MOUSE	37	0.000588361	0.000765693	0.00078062	0.00103234	0.000809726	0.000539753	0.000604642	0.000644989	0.000791754	0.000649778
NADH dehydrogenase [ubiquinone] iron-sulfur protein 3, mitochondrial OS=Mus musculus OX=10090 GN=Ndufs3 PE=1 SV=2	sp|Q9DCT2|NDUS3_MOUSE	30	0.000967527	0.000515103	0.000561613	0.00100039	0.00154339	0.00096156	0.00108469	0.000795487	0.000761158	0.00109628
Ferritin heavy chain OS=Mus musculus OX=10090 GN=Fth1 PE=1 SV=2	sp|P09528|FRIH_MOUSE	21	0.00138218	0.00134908	0.00126076	0.00129921	0.00155636	0.00147932	0.00145271	0.00113641	0.00132281	0.0014062
Collagen alpha-2(VI) chain OS=Mus musculus OX=10090 GN=Col6a2 PE=1 SV=3	sp|Q02788|CO6A2_MOUSE	110	0.000296855	0.00037462	0.000131286	0.000223227	0.000420924	0.000181553	0.000147912	0.000144634	0.000256497	0.000223756
Gamma-enolase OS=Mus musculus OX=10090 GN=Eno2 PE=1 SV=2	sp|P17183|ENOG_MOUSE	47	0	0	0	0	0	0.000236062	0	0.000253879	0	0.000122485
Ig kappa chain V-II region 26-10 OS=Mus musculus OX=10090 PE=1 SV=1	sp|P01631|KV2A7_MOUSE	12	0.00211646	0.00214626	0.00160461	0.00250097	0.00136181	0.00203407	0.00169483	0.00165726	0.00209208	0.00168699
NADH dehydrogenase [ubiquinone] iron-sulfur protein 6, mitochondrial OS=Mus musculus OX=10090 GN=Ndufs6 PE=1 SV=2	sp|P52503|NDUS6_MOUSE	13	0.00111638	0.000594349	0.00203662	0.00209872	0.00272362	0.0018776	0.00265958	0.00183574	0.00146152	0.00227414
40S ribosomal protein S7 OS=Mus musculus OX=10090 GN=Rps7 PE=2 SV=1	sp|P62082|RS7_MOUSE	22	0.000824597	0.00128776	0.00109405	0.00148818	0.000990409	0.00121036	0.00110934	0.000994358	0.00117365	0.00107612
Fumarate hydratase, mitochondrial OS=Mus musculus OX=10090 GN=Fh PE=1 SV=3	sp|P97807|FUMH_MOUSE	54	0.000335947	0.000381558	0.000312007	0.000555772	0.000706125	0.000493108	0.000451955	0.000405109	0.000396321	0.000514074
Pyruvate dehydrogenase protein X component, mitochondrial OS=Mus musculus OX=10090 GN=Pdhx PE=1 SV=1	sp|Q8BKZ9|ODPX_MOUSE	54	0.000470325	0.000238474	0.000445724	0.000454722	0.000353062	0.000328739	0.000451955	0.000405109	0.000402311	0.000384716
40S ribosomal protein S29 OS=Mus musculus OX=10090 GN=Rps29 PE=1 SV=2	sp|P62274|RS29_MOUSE	7	0.0057015	0.00441517	0.00378229	0.00428738	0.00389089	0.00285298	0.00174325	0.00227282	0.00454658	0.00268999
Caveolae-associated protein 4 OS=Mus musculus OX=10090 GN=Cavin4 PE=1 SV=1	sp|A2AMM0|CAVN4_MOUSE	41	0.00079644	0.000628174	0.000587051	0.000798537	0.000797158	0.000595337	0.000496048	0.000630569	0.00070255	0.000629778
Catalase OS=Mus musculus OX=10090 GN=Cat PE=1 SV=4	sp|P24270|CATA_MOUSE	60	0.000120941	0.000300477	0.000441267	0.00040925	0.000680906	0.000258882	0.000440656	0.000497179	0.000317984	0.000469406
ATP synthase subunit g, mitochondrial OS=Mus musculus OX=10090 GN=Atp5mg PE=1 SV=1	sp|Q9CPQ8|ATP5L_MOUSE	11	0.00263871	0.00257551	0.00196929	0.00223227	0.00247602	0.00322761	0.00258847	0.00198872	0.00235395	0.00257021
Ig kappa chain V-V region L6 (Fragment) OS=Mus musculus OX=10090 PE=4 SV=1	sp|P01638|KV5A6_MOUSE	13	0.00251185	0.00178305	0.00166632	0.00209872	0.00167608	0.00119484	0.00140801	0.00152978	0.00201498	0.00145218
CDGSH iron-sulfur domain-containing protein 3, mitochondrial OS=Mus musculus OX=10090 GN=Cisd3 PE=1 SV=1	sp|B1AR13|CISD3_MOUSE	16	0.000907056	0.00177067	0.00195562	0.00170521	0.00136181	0.00138687	0.00139824	0.000994358	0.00158464	0.00128532
Isoleucine--tRNA ligase, mitochondrial OS=Mus musculus OX=10090 GN=Iars2 PE=1 SV=1	sp|Q8BIJ6|SYIM_MOUSE	113	0.000160541	4.55843e-05	0.000319501	0.000144867	0.000289234	0.000176733	0.000251975	0.000193592	0.000167623	0.000227884
Ig heavy chain V region 102 OS=Mus musculus OX=10090 PE=1 SV=1	sp|P01750|HVM06_MOUSE	13	0	0.00138682	0	0.000839487	0.000838038	0.00119484	0.00125157	0.00107085	0.000556576	0.00108882
Methylcrotonoyl-CoA carboxylase beta chain, mitochondrial OS=Mus musculus OX=10090 GN=Mccc2 PE=1 SV=1	sp|Q3ULD5|MCCB_MOUSE	61	0	0.000168886	0.000276203	0.000313087	0.000759043	0.000509275	0.000633478	0.000489029	0.000189544	0.000597706
40S ribosomal protein S20 OS=Mus musculus OX=10090 GN=Rps20 PE=1 SV=1	sp|P60867|RS20_MOUSE	13	0.00279094	0.00217928	0.00129603	0.00125923	0.00167608	0.00238968	0.0020338	0.00198872	0.00188137	0.00202207
60S ribosomal protein L12 OS=Mus musculus OX=10090 GN=Rpl12 PE=1 SV=2	sp|P35979|RL12_MOUSE	18	0.00141098	0.00114467	0.00173832	0.000909444	0.00136181	0.00110949	0.00135586	0.0014363	0.00130085	0.00131587
60S ribosomal protein L10-like OS=Mus musculus OX=10090 GN=Rpl10l PE=2 SV=1	sp|P86048|RL10L_MOUSE (+1)	25	0.000725645	0.00103021	0.000770211	0.000545667	0.00087156	0.000798835	0.000650815	0.00111368	0.000767932	0.000858723
Adenylate kinase isoenzyme 1 OS=Mus musculus OX=10090 GN=Ak1 PE=1 SV=1	sp|Q9R0Y5|KAD1_MOUSE	22	0.00115444	0.00105362	0.00120346	0.000496061	0.00148561	0.00121036	0.00138668	0.00126555	0.000976893	0.00133705
Histone H2A type 2-C OS=Mus musculus OX=10090 GN=H2ac20 PE=1 SV=3	sp|Q64523|H2A2C_MOUSE (+1)	14	0.00259159	0.00128776	0.000859611	0.000779524	0.000389089	0.000792495	0.000290542	0.00142051	0.00137962	0.00072316
Dynamin-like 120 kDa protein, mitochondrial OS=Mus musculus OX=10090 GN=Opa1 PE=1 SV=1	sp|P58281|OPA1_MOUSE	111	0.000130747	0.00016242	0.000216839	0.000172057	0.000122686	0.000179918	0.000256515	0.000143331	0.000170516	0.000175612
Ferrochelatase, mitochondrial OS=Mus musculus OX=10090 GN=Fech PE=1 SV=2	sp|P22315|HEMH_MOUSE	47	0.000540374	0.000383587	0.000409687	0.000464397	0.000869242	0.000424912	0.00056254	0.000550071	0.000449511	0.000601691
Voltage-dependent anion-selective channel protein 1 OS=Mus musculus OX=10090 GN=Vdac1 PE=1 SV=3	sp|Q60932|VDAC1_MOUSE	32	0.000226764	0.000724363	0.000300864	0.000426302	0.000425566	0.000277373	0.000381337	0.000559327	0.000419573	0.000410901
Cytochrome c, somatic OS=Mus musculus OX=10090 GN=Cycs PE=1 SV=2	sp|P62897|CYC_MOUSE	12	0.000604704	0.00193164	0.00240691	0.00113681	0.00204272	0.00332848	0.00254225	0.00116008	0.00152001	0.00226838
AFG3-like protein 2 OS=Mus musculus OX=10090 GN=Afg3l2 PE=1 SV=1	sp|Q8JZQ2|AFG32_MOUSE	90	0	8.58505e-05	0.000294178	0.000151574	0.000272362	0.000295865	0.000225977	0.000287259	0.000132901	0.000270366
Ig heavy chain V region 1-72 OS=Mus musculus OX=10090 GN=Ighv1-72 PE=1 SV=2	sp|P06328|HVM49_MOUSE	13	0.000837283	0.00217928	0.000740588	0.000839487	0.000838038	0.00119484	0.000625784	0.00122383	0.00114916	0.000970621
Ig kappa chain V-V region K2 (Fragment) OS=Mus musculus OX=10090 PE=1 SV=1	sp|P01635|KV5A3_MOUSE	13	0.000837283	0.00277363	0.00203662	0.0014691	0.00125706	0.00238968	0.00156446	0.0013768	0.00177916	0.001647
60S ribosomal protein L27 OS=Mus musculus OX=10090 GN=Rpl27 PE=1 SV=2	sp|P61358|RL27_MOUSE	16	0.00158735	0.00177067	0.00105302	0.00102313	0.00119159	0.00110949	0.00152535	0.00136724	0.00135854	0.00129842
Dehydrogenase/reductase SDR family member 4 OS=Mus musculus OX=10090 GN=Dhrs4 PE=1 SV=3	sp|Q99LB2|DHRS4_MOUSE	30	0.000846586	0.000600953	0.000561613	0.00127322	0.0007263	0.000665696	0.000610139	0.000729196	0.000820593	0.000682833
Ubiquitin-like modifier-activating enzyme 1 OS=Mus musculus OX=10090 GN=Uba1 PE=1 SV=1	sp|Q02053|UBA1_MOUSE	118	6.14953e-05	0.000196438	0.000285566	0.000208093	0.000253897	0.000131635	0.000189591	0.00028651	0.000187898	0.000215408
Troponin T, cardiac muscle OS=Mus musculus OX=10090 GN=Tnnt2 PE=1 SV=2	sp|P50752|TNNT2_MOUSE	36	0.000705488	0.00100159	0.000267435	0.000682083	0.000832218	0.000493108	0.000338966	0.000828632	0.000664149	0.000623231
Annexin A6 OS=Mus musculus OX=10090 GN=Anxa6 PE=1 SV=3	sp|P14824|ANXA6_MOUSE	76	0	0.00020333	0.000380039	0.000358991	0.000430046	0.000379563	0.000294365	0.000418677	0.00023559	0.000380663
Adhesion G-protein coupled receptor V1 OS=Mus musculus OX=10090 GN=Adgrv1 PE=1 SV=1	sp|Q8VHN7|AGRV1_MOUSE	687	1.58438e-05	7.49786e-06	0	0	0	0	0	0	5.83541e-06	0
Ig kappa chain V region Mem5 (Fragment) OS=Mus musculus OX=10090 PE=1 SV=1	sp|P84750|KVM5_MOUSE	13	0	0	0.00111088	0	0	0.000341382	0.000312892	0.000458935	0.00027772	0.000278302
Four and a half LIM domains protein 1 OS=Mus musculus OX=10090 GN=Fhl1 PE=1 SV=3	sp|P97447|FHL1_MOUSE	32	0.000793674	0.000965818	0.000676944	0.00110839	0.000680906	0.00041606	0.000444893	0.000559327	0.000886205	0.000525296
60S ribosomal protein L11 OS=Mus musculus OX=10090 GN=Rpl11 PE=1 SV=4	sp|Q9CXW4|RL11_MOUSE	20	0.00108847	0.00103021	0.00108311	0.000682083	0.00122563	0.00122044	0.0010169	0.00129267	0.000970967	0.00118891
Filamin-A OS=Mus musculus OX=10090 GN=Flna PE=1 SV=5	sp|Q8BTM8|FLNA_MOUSE	281	0	6.41587e-05	5.13931e-05	5.82562e-05	0.000155082	6.3174e-05	4.34263e-05	3.53864e-05	4.3452e-05	7.42671e-05
Phospholipid hydroperoxide glutathione peroxidase OS=Mus musculus OX=10090 GN=Gpx4 PE=1 SV=4	sp|O70325|GPX4_MOUSE	22	0.00131935	0.00105362	0.00131286	0.00024803	0.00111421	0.000806904	0.00110934	0.00072317	0.000983466	0.000938407
28S ribosomal protein S22, mitochondrial OS=Mus musculus OX=10090 GN=Mrps22 PE=1 SV=1	sp|Q9CXW2|RT22_MOUSE	41	0.00026548	0.000188452	0.00011741	0.000199634	0	0.000216486	0.000248024	0.000339537	0.000192744	0.000201012
F-box only protein 50 OS=Mus musculus OX=10090 GN=Nccrp1 PE=1 SV=2	sp|G3X9C2|FBX50_MOUSE	30	0.000483763	0.000343402	0.000722073	0.000272833	0.000453937	0.000517763	0.000271173	0.000198872	0.000455518	0.000360436
Chloride intracellular channel protein 4 OS=Mus musculus OX=10090 GN=Clic4 PE=1 SV=3	sp|Q9QYB1|CLIC4_MOUSE	29	0	0	0	0	0.000187836	0.000153033	0.000140262	0.000137153	0	0.000154571
Ig kappa chain V-V region MOPC 21 OS=Mus musculus OX=10090 PE=1 SV=1	sp|P01634|KV5A2_MOUSE	15	0.000725645	0.000515103	0.000481382	0.000545667	0	0.000443797	0.000406759	0	0.000566949	0.000212639
40S ribosomal protein S13 OS=Mus musculus OX=10090 GN=Rps13 PE=1 SV=2	sp|P62301|RS13_MOUSE	17	0.000640275	0.00181801	0.00184058	0.000802451	0.00208277	0.00143581	0.00119635	0.0007019	0.00127533	0.00135421
Carbonyl reductase family member 4 OS=Mus musculus OX=10090 GN=Cbr4 PE=1 SV=2	sp|Q91VT4|CBR4_MOUSE	25	0.00145129	0.000515103	0.000866488	0.00109133	0.00119839	0.000887594	0.000813519	0.000636389	0.000981054	0.000883974
60S ribosomal protein L7a OS=Mus musculus OX=10090 GN=Rpl7a PE=1 SV=2	sp|P12970|RL7A_MOUSE	30	0	0.00103021	0.000962764	0.000909444	0.000453937	0.000443797	0.000881312	0.000662906	0.000725604	0.000610488
Elongin-B OS=Mus musculus OX=10090 GN=Elob PE=1 SV=1	sp|P62869|ELOB_MOUSE	13	0.00223275	0.00217928	0.00203662	0.00104936	0.00188559	0.0018776	0.00156446	0.00152978	0.0018745	0.00171436
Lipoamide acyltransferase component of branched-chain alpha-keto acid dehydrogenase complex, mitochondrial OS=Mus musculus OX=10090 GN=Dbt PE=1 SV=2	sp|P53395|ODB2_MOUSE	53	0.000342285	0.000340162	0.000499548	0.00025739	0.000411113	0.000460544	0.000537229	0.000412753	0.000359846	0.00045541
Ig lambda-2 chain C region OS=Mus musculus OX=10090 GN=Iglc2 PE=1 SV=1	sp|P01844|LAC2_MOUSE	11	0.00197903	0.00280965	0.00262572	0.00272833	0.000990409	0.00161381	0.00129423	0.00162713	0.00253568	0.0013814
Arginase-1 OS=Mus musculus OX=10090 GN=Arg1 PE=1 SV=1	sp|Q61176|ARGI1_MOUSE	35	0.000621981	0.000294344	0.00061892	0.000233857	0.000233453	0.000316998	0.000174325	0	0.000442276	0.000181194
ADP-ribosylation factor 3 OS=Mus musculus OX=10090 GN=Arf3 PE=2 SV=2	sp|P61205|ARF3_MOUSE	21	0.00103664	0.000735861	0.000458459	0.000259841	0.000907874	0.00105666	0.00116217	0.000757606	0.000622699	0.000971078
Ig kappa chain V-III region PC 7043 OS=Mus musculus OX=10090 PE=1 SV=1	sp|P01665|KV3AD_MOUSE (+1)	12	0	0.00171701	0.00100288	0.00250097	0	0.00129441	0.0010169	0.00198872	0.00130522	0.00107501
40S ribosomal protein S15a OS=Mus musculus OX=10090 GN=Rps15a PE=1 SV=2	sp|P62245|RS15A_MOUSE	15	0.00145129	0.00120191	0.00144415	0.00109133	0.0014526	0.00118346	0.000949105	0.00159097	0.00129717	0.00129403
CD5 antigen-like OS=Mus musculus OX=10090 GN=Cd5l PE=1 SV=3	sp|Q9QWK4|CD5L_MOUSE	39	0.000279094	0.000792466	0.000493725	0.000909444	0.000558692	0.000284485	0.00036504	0.000407942	0.000618682	0.00040404
Gasdermin-A OS=Mus musculus OX=10090 GN=Gsdma PE=2 SV=1	sp|Q9EST1|GSDMA_MOUSE	50	0.000580516	0.000257551	0.000240691	0.000109133	0.000326835	0.000133139	0	0	0.000296973	0.000114993
Parkinson disease protein 7 homolog OS=Mus musculus OX=10090 GN=Park7 PE=1 SV=1	sp|Q99LX0|PARK7_MOUSE	20	0.000907056	0.00115898	0.000962764	0.00109133	0.00136181	0.000998543	0.000915209	0.000994358	0.00103003	0.00106748
Major vault protein OS=Mus musculus OX=10090 GN=Mvp PE=1 SV=4	sp|Q9EQK5|MVP_MOUSE	96	0.00018897	0.00016097	0.00012536	0.000113681	0.000340453	0.000300488	0.000233039	0.000269305	0.000147245	0.000285821
Biglycan OS=Mus musculus OX=10090 GN=Bgn PE=1 SV=1	sp|P28653|PGS1_MOUSE	42	0.000345545	0.000551896	0.000458459	0.000389762	0.000583634	0.000264165	0.000484237	0.000426154	0.000436416	0.000439547
Voltage-dependent anion-selective channel protein 3 OS=Mus musculus OX=10090 GN=Vdac3 PE=1 SV=1	sp|Q60931|VDAC3_MOUSE	31	0	0	0.000155285	0.000176022	0.000351435	0.000429481	0.000590457	0.000449065	8.28265e-05	0.00045511
60S ribosomal protein L15 OS=Mus musculus OX=10090 GN=Rpl15 PE=1 SV=4	sp|Q9CZM2|RL15_MOUSE	24	0.000302352	0.000536565	0.00140403	0.000454722	0.000453937	0.000369831	0.000847415	0.000994358	0.000674418	0.000666385
Ig heavy chain V region 36-65 OS=Mus musculus OX=10090 PE=1 SV=1	sp|P01747|HVM03_MOUSE	13	0.00195366	0.0011887	0.000740588	0.000839487	0.000628528	0	0.000469338	0.000458935	0.00118061	0.0003892
Complement C4-B OS=Mus musculus OX=10090 GN=C4b PE=1 SV=3	sp|P01029|CO4B_MOUSE	193	0	9.34124e-05	0.000112239	0.000113092	2.82241e-05	8.04813e-05	0.000105378	0.000144259	7.96858e-05	8.95857e-05
Hydroxysteroid dehydrogenase-like protein 2 OS=Mus musculus OX=10090 GN=Hsdl2 PE=1 SV=1	sp|Q2TPA8|HSDL2_MOUSE	54	0	0.000381558	0.000534869	0.000303148	0.00060525	0.000287646	0.000414292	0.000331453	0.000304894	0.00040966
Heterogeneous nuclear ribonucleoprotein U OS=Mus musculus OX=10090 GN=Hnrnpu PE=1 SV=1	sp|Q8VEK3|HNRPU_MOUSE	88	0.000164919	0.000263405	0.000300864	0.000217027	0.000185702	0.000126079	0.000161779	0.00024859	0.000236554	0.000180537
ATP synthase subunit f, mitochondrial OS=Mus musculus OX=10090 GN=Atp5mf PE=1 SV=3	sp|P56135|ATPK_MOUSE	10	0.00145129	0.00154531	0.00168484	0.00109133	0.00108945	0.00177519	0.0010169	0.000596615	0.00144319	0.00111954
60S ribosomal protein L35a OS=Mus musculus OX=10090 GN=Rpl35a PE=1 SV=2	sp|O55142|RL35A_MOUSE	13	0.00139547	0.00178305	0.00111088	0.00125923	0.00146657	0.00119484	0.00140801	0.00152978	0.00138716	0.0013998
Laminin subunit alpha-2 OS=Mus musculus OX=10090 GN=Lama2 PE=1 SV=2	sp|Q60675|LAMA2_MOUSE	344	3.16415e-05	0.000127278	0	3.17248e-05	0.00019002	0	0	2.89058e-05	4.76612e-05	5.47315e-05
Myosin regulatory light chain 12B OS=Mus musculus OX=10090 GN=Myl12b PE=1 SV=2	sp|Q3THE2|ML12B_MOUSE	20	0.00145129	0.00103021	0.000601728	0.00136417	0.00108945	0.000887594	0.000610139	0.000894923	0.00111185	0.000870526
Caveolae-associated protein 2 OS=Mus musculus OX=10090 GN=Cavin2 PE=1 SV=3	sp|Q63918|CAVN2_MOUSE	47	0	0.000383587	0.000409687	0.000232199	0.000289747	0.0003777	0.000432723	0.000380818	0.000256368	0.000370247
S-phase kinase-associated protein 1 OS=Mus musculus OX=10090 GN=Skp1 PE=1 SV=3	sp|Q9WTX5|SKP1_MOUSE	19	0.00114576	0.00121998	0.00164683	0.000574386	0.000860092	0.00093431	0.000856336	0.000732685	0.00114674	0.000845855
Histone H2B type 3-B OS=Mus musculus OX=10090 GN=H2bu1 PE=1 SV=3	sp|Q8CGP0|H2B3B_MOUSE (+1)	14	0	0	0	0	0	0	0	0.00142051	0	0.000355128
ATP synthase-coupling factor 6, mitochondrial OS=Mus musculus OX=10090 GN=Atp5pf PE=1 SV=1	sp|P97450|ATP5J_MOUSE	12	0.00302352	0.00128776	0.00100288	0.00113681	0.00158878	0.00147932	0.00169483	0.00149154	0.00161274	0.00156362
60S ribosomal protein L31 OS=Mus musculus OX=10090 GN=Rpl31 PE=1 SV=1	sp|P62900|RL31_MOUSE	14	0.00181411	0.00202362	0.00120346	0.00116929	0.00136181	0.00174349	0.0010169	0.000994358	0.00155262	0.00127914
Nexilin OS=Mus musculus OX=10090 GN=Nexn PE=1 SV=3	sp|Q7TPW1|NEXN_MOUSE	72	0.000151176	0.000429252	0.000133717	0.000189468	0.000340453	0	0	0.000580042	0.000225903	0.000230124
Asporin OS=Mus musculus OX=10090 GN=Aspn PE=1 SV=1	sp|Q99MQ4|ASPN_MOUSE	43	0.000506264	0.000718748	0.000335848	0.000571047	0.000760081	0.000206417	0.000141893	0.000508742	0.000532977	0.000404283
60S ribosomal protein L23a OS=Mus musculus OX=10090 GN=Rpl23a PE=1 SV=1	sp|P62751|RL23A_MOUSE	18	0.00141098	0.00114467	0.000936021	0.00075787	0.00105919	0.00123277	0.00112989	0.00165726	0.00106239	0.00126978
Atypical kinase COQ8A, mitochondrial OS=Mus musculus OX=10090 GN=Coq8a PE=1 SV=2	sp|Q60936|COQ8A_MOUSE	72	0.000151176	0.000107313	0.000133717	7.5787e-05	0.000302625	0.000184915	0.000282472	0.000165726	0.000116998	0.000233935
Thioredoxin-dependent peroxide reductase, mitochondrial OS=Mus musculus OX=10090 GN=Prdx3 PE=1 SV=1	sp|P20108|PRDX3_MOUSE	28	0.000777477	0.000643878	0.000601728	0.000389762	0.000972723	0.000554746	0.000871627	0.000852307	0.000603211	0.000812851
Mitochondrial pyruvate carrier 1 OS=Mus musculus OX=10090 GN=Mpc1 PE=1 SV=1	sp|P63030|MPC1_MOUSE	12	0.00181411	0.00150238	0.00160461	0.000682083	0.00158878	0.00166424	0.00118638	0.00116008	0.0014008	0.00139987
Laminin subunit gamma-1 OS=Mus musculus OX=10090 GN=Lamc1 PE=1 SV=2	sp|P02468|LAMC1_MOUSE	177	0.000184486	0.000189162	4.07951e-05	0.0001079	0.000338529	0	0	8.98855e-05	0.000130586	0.000107104
Ig kappa chain V-VI region NQ6-8.3.1 OS=Mus musculus OX=10090 PE=2 SV=1	sp|P04943|KV6A9_MOUSE	12	0.00151176	0.00171701	0.00200576	0.00181889	0.00113484	0.00110949	0.00135586	0.00132581	0.00176335	0.0012315
Destrin OS=Mus musculus OX=10090 GN=Dstn PE=1 SV=3	sp|Q9R0P5|DEST_MOUSE	19	0.000954796	0.000677767	0.00101344	0.000574386	0.000860092	0.000583943	0.000963377	0.00104669	0.000805096	0.000863526
GMP reductase 1 OS=Mus musculus OX=10090 GN=Gmpr PE=1 SV=1	sp|Q9DCZ1|GMPR1_MOUSE	37	0.000686421	0.000417651	0.000325258	0.000516171	0.000662503	0.000479781	0.000549675	0.000429993	0.000486375	0.000530488
Heat shock protein beta-1 OS=Mus musculus OX=10090 GN=Hspb1 PE=1 SV=3	sp|P14602|HSPB1_MOUSE	23	0.00205074	0.000783852	0.000418593	0.000830362	0.00071051	0.00038591	0.000618982	0.00043233	0.00102089	0.000536933
60S ribosomal protein L5 OS=Mus musculus OX=10090 GN=Rpl5 PE=1 SV=3	sp|P47962|RL5_MOUSE	34	0.00042685	0.000833255	0.000637123	0.000481471	0.000400533	0.000261057	0.000358905	0.000760392	0.000594675	0.000445222
60S ribosomal protein L28 OS=Mus musculus OX=10090 GN=Rpl28 PE=1 SV=2	sp|P41105|RL28_MOUSE	16	0.000453528	0.00112679	0.00150432	0	0.000680906	0.000970806	0.00165246	0.00136724	0.000771159	0.00116785
Cytochrome c oxidase subunit 6B1 OS=Mus musculus OX=10090 GN=Cox6b1 PE=1 SV=2	sp|P56391|CX6B1_MOUSE	10	0.00181411	0.00206041	0.00216622	0.00109133	0.00190654	0.00288468	0.0020338	0.000994358	0.00178302	0.00195484
Nidogen-1 OS=Mus musculus OX=10090 GN=Nid1 PE=1 SV=2	sp|P10493|NID1_MOUSE	137	7.94502e-05	0.000244392	8.78435e-05	5.97445e-05	0.000337968	0.000113379	5.93809e-05	0.000116129	0.000117858	0.000156714
Transcriptional activator protein Pur-alpha OS=Mus musculus OX=10090 GN=Pura PE=1 SV=1	sp|P42669|PURA_MOUSE	35	0.000310991	0.000294344	0.000275076	0.000389762	0.000311271	0.000380397	0.000290542	0.000340923	0.000317543	0.000330784
Phosphoglycerate mutase 2 OS=Mus musculus OX=10090 GN=Pgam2 PE=1 SV=3	sp|O70250|PGAM2_MOUSE	29	0.000875778	0.000444054	0.000580978	0.000752644	0.0010331	0.000535617	0.000490916	0.000685764	0.000663364	0.000686349
Isovaleryl-CoA dehydrogenase, mitochondrial OS=Mus musculus OX=10090 GN=Ivd PE=1 SV=1	sp|Q9JHI5|IVD_MOUSE	46	0.000236623	0.000279947	0.000261621	0.000415181	0.000473674	0.000482388	0.000574769	0.00043233	0.000298343	0.00049079
Laminin subunit beta-2 OS=Mus musculus OX=10090 GN=Lamb2 PE=1 SV=2	sp|Q61292|LAMB2_MOUSE	197	0.000147339	0.000183031	2.44356e-05	6.9247e-05	0.000235033	0	0	6.05701e-05	0.000106013	7.39009e-05
2,4-dienoyl-CoA reductase, mitochondrial OS=Mus musculus OX=10090 GN=Decr1 PE=1 SV=1	sp|Q9CQ62|DECR_MOUSE	36	0.000302352	0.000286168	0.000534869	0.000378935	0.000302625	0.000678023	0.000508449	0.000276211	0.000375581	0.000441327
Endoplasmin OS=Mus musculus OX=10090 GN=Hsp90b1 PE=1 SV=2	sp|P08113|ENPL_MOUSE	92	0.000197186	8.39842e-05	0.000156972	8.89674e-05	0.000177628	0.000144716	0.000198958	0.00043233	0.000131778	0.000238408
Aspartate aminotransferase, cytoplasmic OS=Mus musculus OX=10090 GN=Got1 PE=1 SV=3	sp|P05201|AATC_MOUSE	46	0.000236623	0.000335937	0.000470917	0.000415181	0.000532883	0.00038591	0.000486343	0.00043233	0.000364665	0.000459366
Glutathione S-transferase P 1 OS=Mus musculus OX=10090 GN=Gstp1 PE=1 SV=2	sp|P19157|GSTP1_MOUSE	24	0.00105823	0.000536565	0.000601728	0.000454722	0.00102136	0.000554746	0.000932157	0.000580042	0.000662812	0.000772076
Ig kappa chain V-III region PC 3741/TEPC 111 OS=Mus musculus OX=10090 PE=1 SV=1	sp|P01660|KV3A8_MOUSE	12	0.000907056	0.00128776	0.00160461	0.00227361	0	0	0.000847415	0.000662906	0.00151826	0.00037758
D-beta-hydroxybutyrate dehydrogenase, mitochondrial OS=Mus musculus OX=10090 GN=Bdh1 PE=1 SV=2	sp|Q80XN0|BDH_MOUSE	38	0.000859316	0.000271107	0.000190019	0.000358991	0.000716743	0.000291972	0.000481689	0.000366343	0.000419858	0.000464187
Cytochrome b-c1 complex subunit 7 OS=Mus musculus OX=10090 GN=Uqcrb PE=1 SV=3	sp|Q9D855|QCR7_MOUSE	14	0.00103664	0.000919826	0.00137538	0.000779524	0.000972723	0.00142649	0.00174325	0.00142051	0.00102784	0.00139074
Protein SET OS=Mus musculus OX=10090 GN=Set PE=1 SV=1	sp|Q9EQU5|SET_MOUSE	33	0.000549731	0.000390229	0.000291747	0.000413384	0.00041267	0.00033621	0.000246521	0.000482113	0.000411273	0.000369379
Heterogeneous nuclear ribonucleoprotein K OS=Mus musculus OX=10090 GN=Hnrnpk PE=1 SV=1	sp|P61979|HNRPK_MOUSE	51	0.000142283	0.000353502	0.000235972	0.000267484	0.000320426	0.000217548	0.00023927	0.000740895	0.00024981	0.000379535
ATP-dependent 6-phosphofructokinase, platelet type OS=Mus musculus OX=10090 GN=Pfkp PE=1 SV=1	sp|Q9WUA3|PFKAP_MOUSE	85	0	0	0	0	0.000128171	0	0.000119635	9.35867e-05	0	8.53481e-05
Thioredoxin OS=Mus musculus OX=10090 GN=Txn PE=1 SV=3	sp|P10639|THIO_MOUSE	12	0.000907056	0.000858505	0.00100288	0.000454722	0.00158878	0.000924577	0.000677932	0.000497179	0.000805791	0.000922117
Nucleolin OS=Mus musculus OX=10090 GN=Ncl PE=1 SV=2	sp|P09405|NUCL_MOUSE	77	9.42396e-05	0.000100345	0.000281327	0.000141732	0.000282974	0	0.000211304	0.00020662	0.000154411	0.000175224
NADH dehydrogenase [ubiquinone] 1 subunit C2 OS=Mus musculus OX=10090 GN=Ndufc2 PE=1 SV=1	sp|Q9CQ54|NDUC2_MOUSE	14	0.00129579	0.00110379	0.000859611	0.000779524	0.00136181	0.00126799	0.00159798	0.00127846	0.00100968	0.00137656
Pyruvate carboxylase, mitochondrial OS=Mus musculus OX=10090 GN=Pc PE=1 SV=1	sp|Q05920|PYC_MOUSE	130	0	7.92466e-05	9.25735e-05	0	4.19019e-05	0.000102415	0.000109512	0.000122383	4.2955e-05	9.40528e-05
Succinate--CoA ligase [GDP-forming] subunit beta, mitochondrial OS=Mus musculus OX=10090 GN=Suclg2 PE=1 SV=3	sp|Q9Z2I8|SUCB2_MOUSE	47	0.000231589	0.000219193	0.000204843	0.000406348	0.000521545	0.000519337	0.000475995	0.000423131	0.000265493	0.000485002
26S proteasome non-ATPase regulatory subunit 2 OS=Mus musculus OX=10090 GN=Psmd2 PE=1 SV=1	sp|Q8VDM4|PSMD2_MOUSE	100	7.25645e-05	0.000103021	0.000240691	0.000109133	0.000163417	0.000155329	0.000284732	0.000238646	0.000131352	0.000210531
Myosin regulatory light polypeptide 9 OS=Mus musculus OX=10090 GN=Myl9 PE=1 SV=3	sp|Q9CQ19|MYL9_MOUSE	20	0	0.00115898	0	0	0	0.000887594	0	0	0.000289745	0.000221899
ATP-binding cassette sub-family E member 1 OS=Mus musculus OX=10090 GN=Abce1 PE=1 SV=1	sp|P61222|ABCE1_MOUSE	67	0	0.000115322	0	0	8.13022e-05	0	6.07104e-05	0	2.88304e-05	3.55031e-05
Prohibitin-2 OS=Mus musculus OX=10090 GN=Phb2 PE=1 SV=1	sp|O35129|PHB2_MOUSE	33	0.000659677	0.000780459	0.000364683	0.000578737	0.00082534	0.000403452	0.000554672	0.000421849	0.000595889	0.000551328
Heat shock protein 75 kDa, mitochondrial OS=Mus musculus OX=10090 GN=Trap1 PE=1 SV=1	sp|Q9CQN1|TRAP1_MOUSE	80	0	0.00016097	0.000210605	0.000204625	0.000238317	0.000221899	0.00020338	0.00024859	0.00014405	0.000228046
Cofilin-1 OS=Mus musculus OX=10090 GN=Cfl1 PE=1 SV=3	sp|P18760|COF1_MOUSE	19	0.000954796	0.000677767	0.000886757	0.000287193	0.00100344	0.000583943	0.00117746	0.00146537	0.000701628	0.00105755
40S ribosomal protein S23 OS=Mus musculus OX=10090 GN=Rps23 PE=1 SV=3	sp|P62267|RS23_MOUSE	16	0.000680292	0.0016097	0.00075216	0.00102313	0.00102136	0.00110949	0.0010169	0.00136724	0.00101632	0.00112875
Kinectin OS=Mus musculus OX=10090 GN=Ktn1 PE=1 SV=1	sp|Q61595|KTN1_MOUSE	153	7.11417e-05	0.000151501	9.43887e-05	0.000106993	0.00012461	5.80127e-05	0.000106342	7.79889e-05	0.000106006	9.17385e-05
Estradiol 17-beta-dehydrogenase 8 OS=Mus musculus OX=10090 GN=Hsd17b8 PE=1 SV=2	sp|P50171|DHB8_MOUSE	27	0.000940651	0.000572336	0.000624014	0.000707346	0.000907874	0.000575292	0.000451955	0.000515593	0.000711087	0.000612679
5-oxoprolinase OS=Mus musculus OX=10090 GN=Oplah PE=1 SV=1	sp|Q8K010|OPLA_MOUSE	138	0	7.46526e-05	0.000104648	0.000118623	7.89456e-05	0.000128637	0.000117901	0.000115288	7.4481e-05	0.000110193
E3 ubiquitin-protein ligase TRIM21 OS=Mus musculus OX=10090 GN=Trim21 PE=1 SV=1	sp|Q62191|RO52_MOUSE	54	0.000134379	0.000381558	0.000267435	0.000151574	0.000151312	0.000287646	0.000188315	0.000147312	0.000233736	0.000193646
Aflatoxin B1 aldehyde reductase member 2 OS=Mus musculus OX=10090 GN=Akr7a2 PE=1 SV=3	sp|Q8CG76|ARK72_MOUSE	41	0.000619453	0.000439722	0.000352231	0.000332724	0.000597869	0.000487094	0.000496048	0.000291032	0.000436032	0.000468011
Methylmalonate-semialdehyde dehydrogenase [acylating], mitochondrial OS=Mus musculus OX=10090 GN=Aldh6a1 PE=1 SV=1	sp|Q9EQ20|MMSA_MOUSE	58	0.000500445	0.000222027	0.000331988	0.000282241	0.000328713	0.000191292	0.000140262	0.000137153	0.000334175	0.000199355
Ig kappa chain V-III region PC 2880/PC 1229 OS=Mus musculus OX=10090 PE=1 SV=1	sp|P01654|KV3A1_MOUSE (+1)	12	0.000907056	0.000858505	0.00160461	0.000682083	0	0	0.00152535	0.000497179	0.00101306	0.000505632
Microtubule-associated protein 4 OS=Mus musculus OX=10090 GN=Map4 PE=1 SV=3	sp|P27546|MAP4_MOUSE	117	0	0	0.000123431	4.66382e-05	0.000186231	0.00013276	0.000225977	0.000186973	4.25174e-05	0.000182985
Delta(3,5)-Delta(2,4)-dienoyl-CoA isomerase, mitochondrial OS=Mus musculus OX=10090 GN=Ech1 PE=1 SV=1	sp|O35459|ECH1_MOUSE	36	0	0.000500794	0.00046801	0.000454722	0.000529593	0.000431469	0.000508449	0.000441937	0.000355882	0.000477862
Glutathione peroxidase 3 OS=Mus musculus OX=10090 GN=Gpx3 PE=1 SV=2	sp|P46412|GPX3_MOUSE	25	0.00116103	0.000721144	0.000577659	0.000436533	0.00065367	0.000532556	0.000488111	0.000397743	0.000724092	0.00051802
ADP-ribose glycohydrolase MACROD1 OS=Mus musculus OX=10090 GN=Macrod1 PE=1 SV=2	sp|Q922B1|MACD1_MOUSE	35	0.000414654	0.000367931	0.000412613	0.000389762	0.000544725	0.000316998	0.000290542	0.000397743	0.00039624	0.000387502
60S ribosomal protein L3 OS=Mus musculus OX=10090 GN=Rpl3 PE=1 SV=3	sp|P27659|RL3_MOUSE	46	0	0.000111979	0.000366269	0.00035587	0.000236837	0.000192955	0.000353704	0.000605262	0.000208529	0.000347189
Puromycin-sensitive aminopeptidase OS=Mus musculus OX=10090 GN=Npepps PE=1 SV=2	sp|Q11011|PSA_MOUSE	103	0.000211353	0.00015003	0.000186945	0.000185421	0.000185101	0.000107718	0.00017771	0.000135156	0.000183437	0.000151421
Filamin-B OS=Mus musculus OX=10090 GN=Flnb PE=1 SV=3	sp|Q80X90|FLNB_MOUSE	278	2.61023e-05	0	0	0	0	0	0	0	6.52558e-06	0
Dynactin subunit 1 OS=Mus musculus OX=10090 GN=Dctn1 PE=1 SV=3	sp|O08788|DCTN1_MOUSE	142	7.66526e-05	0.000108825	0.0001017	0.000134495	9.59022e-05	9.37599e-05	7.16126e-05	0.000126045	0.000105418	9.683e-05
60S ribosomal protein L18a OS=Mus musculus OX=10090 GN=Rpl18a PE=1 SV=1	sp|P62717|RL18A_MOUSE	21	0.000518318	0.000858505	0.000458459	0.000649603	0.000778178	0.000739662	0.00077478	0.000568205	0.000621221	0.000715206
60S acidic ribosomal protein P0 OS=Mus musculus OX=10090 GN=Rplp0 PE=1 SV=3	sp|P14869|RLA0_MOUSE	34	0.000320138	0.000378752	0.000212374	0	0.00024032	0.000326321	0.00047854	0.000526425	0.000227816	0.000392902
Talin-1 OS=Mus musculus OX=10090 GN=Tln1 PE=1 SV=2	sp|P26039|TLN1_MOUSE	270	0	0	0	5.05247e-05	0	0	1.50652e-05	0	1.26312e-05	3.76629e-06
Succinyl-CoA:3-ketoacid coenzyme A transferase 1, mitochondrial OS=Mus musculus OX=10090 GN=Oxct1 PE=1 SV=1	sp|Q9D0K2|SCOT1_MOUSE	56	0.000129579	0.000413922	0.000171922	0.000194881	0.000194545	0.000277373	0.00032686	0.00024859	0.000227576	0.000261842
NADH dehydrogenase [ubiquinone] 1 beta subcomplex subunit 10 OS=Mus musculus OX=10090 GN=Ndufb10 PE=1 SV=3	sp|Q9DCS9|NDUBA_MOUSE	21	0	0.000367931	0	0	0.000778178	0.000633996	0.00106532	0.00142051	9.19826e-05	0.000974502
Decorin OS=Mus musculus OX=10090 GN=Dcn PE=1 SV=1	sp|P28654|PGS2_MOUSE	40	0.000181411	0.000450715	0.000300864	0.000204625	0.000544725	0.000332848	0.000355914	0.000298308	0.000284404	0.000382949
[Protein ADP-ribosylarginine] hydrolase-like protein 1 OS=Mus musculus OX=10090 GN=Adprhl1 PE=1 SV=1	sp|Q8BGK2|ARHL1_MOUSE	40	0.000362823	0.000321939	0.000421209	0.00040925	0.000408544	0.000388322	0.000406759	0.000397743	0.000378805	0.000400342
40S ribosomal protein S14 OS=Mus musculus OX=10090 GN=Rps14 PE=1 SV=3	sp|P62264|RS14_MOUSE	16	0.000907056	0.00112679	0.00105302	0.00102313	0.000851132	0.00110949	0.000889786	0.00136724	0.0010275	0.00105441
Murinoglobulin-1 OS=Mus musculus OX=10090 GN=Mug1 PE=1 SV=3	sp|P28665|MUG1_MOUSE	165	0	0	5.83494e-05	8.26768e-05	4.95204e-05	9.41388e-05	0.000110934	0.000144634	3.52565e-05	9.98069e-05
60S ribosomal protein L23 OS=Mus musculus OX=10090 GN=Rpl23 PE=1 SV=1	sp|P62830|RL23_MOUSE	15	0.000967527	0.00137361	0.00112323	0.000909444	0.0007263	0.00147932	0.000813519	0.000928068	0.00109345	0.000986802
Ig heavy chain V region 3 OS=Mus musculus OX=10090 GN=Ighv1-61 PE=1 SV=1	sp|P01749|HVM05_MOUSE	13	0	0.000594349	0	0	0	0	0	0	0.000148587	0
Elongin-C OS=Mus musculus OX=10090 GN=Eloc PE=1 SV=1	sp|P83940|ELOC_MOUSE	12	0.00120941	0.00128776	0.00140403	0.00113681	0.00113484	0.00166424	0.00135586	0.000662906	0.0012595	0.00120446
Phosphoglycerate kinase 1 OS=Mus musculus OX=10090 GN=Pgk1 PE=1 SV=4	sp|P09411|PGK1_MOUSE	45	0.000967527	0	0	0	0	0.000246554	0.000135586	0.00106065	0.000241882	0.000360697
Barrier-to-autointegration factor OS=Mus musculus OX=10090 GN=Banf1 PE=1 SV=1	sp|O54962|BAF_MOUSE	10	0.00181411	0.00206041	0.000962764	0.00136417	0.00245126	0.00133139	0.000610139	0.000994358	0.00155036	0.00134679
ATP synthase protein 8 OS=Mus musculus OX=10090 GN=Mtatp8 PE=1 SV=1	sp|P03930|ATP8_MOUSE	8	0.00226764	0.0016097	0.00120346	0.00136417	0.00136181	0.00110949	0.0020338	0.000994358	0.00161124	0.00137486
Heterogeneous nuclear ribonucleoprotein M OS=Mus musculus OX=10090 GN=Hnrnpm PE=1 SV=3	sp|Q9D0E1|HNRPM_MOUSE	78	0	0.000198116	0.000185147	0.000174893	0.000384101	0.000113794	0.000156446	0.000229467	0.000139539	0.000220952
Gelsolin OS=Mus musculus OX=10090 GN=Gsn PE=1 SV=3	sp|P13020|GELS_MOUSE	86	0.000210943	0.000299478	5.59747e-05	0.000190349	0.00025336	0	0	0.000184997	0.000189186	0.000109589
Electron transfer flavoprotein-ubiquinone oxidoreductase, mitochondrial OS=Mus musculus OX=10090 GN=Etfdh PE=1 SV=1	sp|Q921G7|ETFD_MOUSE	68	0	0.000265126	0.00024777	0	0.000200266	0.000228425	0.000328997	0.000263213	0.000128224	0.000255225
40S ribosomal protein S9 OS=Mus musculus OX=10090 GN=Rps9 PE=1 SV=3	sp|Q6ZWN5|RS9_MOUSE	23	0	0.000447915	0.000941835	0.00035587	0.000592092	0.000482388	0.00114954	0.000778194	0.000436405	0.000750553
Insulin-degrading enzyme OS=Mus musculus OX=10090 GN=Ide PE=1 SV=1	sp|Q9JHR7|IDE_MOUSE	118	0.000368972	0.000218264	0.000183578	6.93644e-05	0	7.52198e-05	6.89423e-05	0	0.000210045	3.60405e-05
Peroxiredoxin-4 OS=Mus musculus OX=10090 GN=Prdx4 PE=1 SV=1	sp|O08807|PRDX4_MOUSE	31	0	0	0.000232927	0.000264032	0.000263576	0	0.000196819	0	0.00012424	0.000115099
DnaJ homolog subfamily A member 2 OS=Mus musculus OX=10090 GN=Dnaja2 PE=1 SV=1	sp|Q9QYJ0|DNJA2_MOUSE	46	0.000473247	0.000335937	0.000261621	0.00035587	0.000355255	0.000144716	0.000132639	0.000345864	0.000356668	0.000244619
Isocitrate dehydrogenase [NADP] cytoplasmic OS=Mus musculus OX=10090 GN=Idh1 PE=1 SV=2	sp|O88844|IDHC_MOUSE	47	0.000308785	0	0	0.000232199	0.000405646	0.00018885	0.000173089	0.000126939	0.000135246	0.000223631
Cytochrome b-c1 complex subunit 6, mitochondrial OS=Mus musculus OX=10090 GN=Uqcrh PE=1 SV=2	sp|P99028|QCR6_MOUSE	10	0.00108847	0.00103021	0.00120346	0.00136417	0.00136181	0.00199709	0.00183042	0.000994358	0.00117157	0.00154592
EH domain-containing protein 2 OS=Mus musculus OX=10090 GN=Ehd2 PE=1 SV=1	sp|Q8BH64|EHD2_MOUSE	61	0.000237916	0.000379994	0.000236745	0	0.000267897	0.000181884	0.000400091	0.000260815	0.000213664	0.000277672
HIV Tat-specific factor 1 homolog OS=Mus musculus OX=10090 GN=Htatsf1 PE=1 SV=1	sp|Q8BGC0|HTSF1_MOUSE	86	0	0	0	6.34496e-05	0	0	0	0	1.58624e-05	0
Ig heavy chain V region 345 OS=Mus musculus OX=10090 PE=1 SV=1	sp|P18526|HVM55_MOUSE	13	0	0.000792466	0.000925735	0.000839487	0.000838038	0.000512074	0.00078223	0	0.000639422	0.000533085
Histone-lysine N-methyltransferase Smyd1 OS=Mus musculus OX=10090 GN=Smyd1 PE=1 SV=3	sp|P97443|SMYD1_MOUSE	56	0	0	0	0	0.000291817	0.000356623	0.000581085	0.000284102	0	0.000378407
Protein-L-isoaspartate O-methyltransferase domain-containing protein 1 OS=Mus musculus OX=10090 GN=Pcmtd1 PE=1 SV=1	sp|P59913|PCMD1_MOUSE	41	0.00053096	0.000314087	0.000352231	0.000465813	0.000398579	0.00032473	0.000297629	0.000339537	0.000415773	0.000340119
Transcriptional activator protein Pur-beta OS=Mus musculus OX=10090 GN=Purb PE=1 SV=3	sp|O35295|PURB_MOUSE	34	0.00042685	0.000303002	0.000212374	0.00032098	0.000400533	0.000391586	0.000299088	0.00035095	0.000315802	0.000360539
2-oxoisovalerate dehydrogenase subunit alpha, mitochondrial OS=Mus musculus OX=10090 GN=Bckdha PE=1 SV=1	sp|P50136|ODBA_MOUSE	50	0.000217694	0.000206041	0.000192553	0.000272833	0.00021789	0.000266278	0.000284732	0.00027842	0.00022228	0.00026183
Cytochrome b-c1 complex subunit 9 OS=Mus musculus OX=10090 GN=Uqcr10 PE=1 SV=1	sp|Q8R1I1|QCR9_MOUSE	7	0.00259159	0.00220758	0.00137538	0.00155905	0.00194545	0.00158499	0.00174325	0.00255692	0.0019334	0.00195765
Sorting and assembly machinery component 50 homolog OS=Mus musculus OX=10090 GN=Samm50 PE=1 SV=1	sp|Q8BGH2|SAM50_MOUSE	52	0.000348868	0.000198116	0.000185147	0.000157404	0.000366642	0.00029871	0.00027378	0.000305956	0.000222384	0.000311272
UTP--glucose-1-phosphate uridylyltransferase OS=Mus musculus OX=10090 GN=Ugp2 PE=1 SV=3	sp|Q91ZJ5|UGPA_MOUSE	57	0.000381918	0	0.000253359	0.000191462	0.000477829	0.000155718	0.000178403	0.000209339	0.000206685	0.000255322
Microsomal glutathione S-transferase 3 OS=Mus musculus OX=10090 GN=Mgst3 PE=1 SV=1	sp|Q9CPU4|MGST3_MOUSE	17	0.00042685	0.000454502	0.000707915	0.00032098	0.000640853	0.000652643	0.000717811	0.000818883	0.000477562	0.000707547
Sorbin and SH3 domain-containing protein 2 OS=Mus musculus OX=10090 GN=Sorbs2 PE=1 SV=2	sp|Q3UTJ2|SRBS2_MOUSE	132	0	0.00013658	7.29367e-05	8.26768e-05	0.000165068	8.40525e-05	4.62227e-05	4.51981e-05	7.30484e-05	8.51353e-05
Aldehyde dehydrogenase, mitochondrial OS=Mus musculus OX=10090 GN=Aldh2 PE=1 SV=1	sp|P47738|ALDH2_MOUSE	57	0.000318265	0.000180738	0.000253359	0.000191462	0.000286697	0.000233577	0.000392487	0.000209339	0.000235956	0.000280525
Unconventional myosin-Ic OS=Mus musculus OX=10090 GN=Myo1c PE=1 SV=2	sp|Q9WTI7|MYO1C_MOUSE	122	0.000118958	0.000253329	5.91863e-05	4.47268e-05	0.000334872	0	0	0.000146709	0.00011905	0.000120395
Nesprin-1 OS=Mus musculus OX=10090 GN=Syne1 PE=1 SV=2	sp|Q6ZWR6|SYNE1_MOUSE	1010	0	5.10003e-06	7.14924e-06	0	0	0	0	0	3.06232e-06	0
Vigilin OS=Mus musculus OX=10090 GN=Hdlbp PE=1 SV=1	sp|Q8VDJ3|VIGLN_MOUSE	142	0	0	3.39002e-05	0	0	4.688e-05	5.72901e-05	5.60202e-05	8.47504e-06	4.00476e-05
Short/branched chain specific acyl-CoA dehydrogenase, mitochondrial OS=Mus musculus OX=10090 GN=Acadsb PE=1 SV=1	sp|Q9DBL1|ACDSB_MOUSE	48	0.00037794	0.000268283	0.000150432	0.000227361	0.000283711	0.000323602	0.000296595	0.000372884	0.000256004	0.000319198
Heat shock protein beta-6 OS=Mus musculus OX=10090 GN=Hspb6 PE=1 SV=1	sp|Q5EBG6|HSPB6_MOUSE	18	0.00100784	0.000715421	0.000802304	0.00075787	0.0012105	0.000862939	0.000564944	0.000883874	0.000820859	0.000880564
Palladin OS=Mus musculus OX=10090 GN=Palld PE=1 SV=2	sp|Q9ET54|PALLD_MOUSE	152	0	0	0.000110845	7.17982e-05	8.95929e-05	4.37958e-05	8.02815e-05	7.8502e-05	4.56607e-05	7.3043e-05
ATP synthase membrane subunit DAPIT, mitochondrial OS=Mus musculus OX=10090 GN=Atp5md PE=1 SV=1	sp|Q78IK2|ATPMD_MOUSE	6	0.00362823	0.00214626	0.00160461	0.00272833	0.00272362	0.00332848	0.00237276	0.00132581	0.00252686	0.00243767
ATP-binding cassette sub-family F member 1 OS=Mus musculus OX=10090 GN=Abcf1 PE=1 SV=1	sp|Q6P542|ABCF1_MOUSE	95	0	0	7.60077e-05	8.61579e-05	0	4.67155e-05	4.28168e-05	4.18677e-05	4.05414e-05	3.285e-05
Talin-2 OS=Mus musculus OX=10090 GN=Tln2 PE=1 SV=3	sp|Q71LX4|TLN2_MOUSE	254	0	2.02796e-05	0	0	0	0	0	2.34888e-05	5.06991e-06	5.8722e-06
Bifunctional epoxide hydrolase 2 OS=Mus musculus OX=10090 GN=Ephx2 PE=1 SV=2	sp|P34914|HYES_MOUSE	63	0.000230364	0.000245287	0.000267435	0.000173228	0.000259393	0.00017611	0.000193695	9.47008e-05	0.000229078	0.000180975
Delta-1-pyrroline-5-carboxylate dehydrogenase, mitochondrial OS=Mus musculus OX=10090 GN=Aldh4a1 PE=1 SV=3	sp|Q8CHT0|AL4A1_MOUSE	62	0	0.000332324	0.000271748	0.000132016	0.000395365	0.00014316	9.84095e-05	9.62282e-05	0.000184022	0.000183291
LIM and calponin homology domains-containing protein 1 OS=Mus musculus OX=10090 GN=Limch1 PE=1 SV=2	sp|Q3UH68|LIMC1_MOUSE	118	9.2243e-05	0.000174611	0	6.93644e-05	0.000161571	9.40248e-05	5.17067e-05	0.000134828	8.40546e-05	0.000110533
Acyl-CoA dehydrogenase family member 10 OS=Mus musculus OX=10090 GN=Acad10 PE=1 SV=1	sp|Q8K370|ACD10_MOUSE	119	0.000121957	0.000108215	0	6.87815e-05	0.000205988	0.000111882	0.000119635	0.000116983	7.47384e-05	0.000138622
Enoyl-CoA delta isomerase 2 OS=Mus musculus OX=10090 GN=Eci2 PE=1 SV=2	sp|Q9WUR2|ECI2_MOUSE	43	0.000253132	0.000119791	0	0.000253798	0.0003167	0.000309626	0.000378381	0.000323745	0.00015668	0.000332113
Cysteine desulfurase, mitochondrial OS=Mus musculus OX=10090 GN=Nfs1 PE=1 SV=3	sp|Q9Z1J3|NFS1_MOUSE	51	0	0	0.000283166	0.000427974	0.000373831	0.000304567	0.000199392	0.000389944	0.000177785	0.000316933
40S ribosomal protein S25 OS=Mus musculus OX=10090 GN=Rps25 PE=1 SV=1	sp|P62852|RS25_MOUSE	14	0.00129579	0.000735861	0.00103153	0.000974405	0.00116727	0.000792495	0.000726356	0.00113641	0.0010094	0.000955632
60S ribosomal protein L13 OS=Mus musculus OX=10090 GN=Rpl13 PE=1 SV=3	sp|P47963|RL13_MOUSE	24	0.000302352	0.000214626	0.00050144	0.000454722	0.000453937	0.000277373	0.000423708	0.000414316	0.000368285	0.000392334
40S ribosomal protein S17 OS=Mus musculus OX=10090 GN=Rps17 PE=1 SV=2	sp|P63276|RS17_MOUSE	16	0	0.000643878	0.00075216	0.000852604	0	0.000832119	0.000889786	0.000870064	0.000562161	0.000647992
Succinate dehydrogenase cytochrome b560 subunit, mitochondrial OS=Mus musculus OX=10090 GN=Sdhc PE=1 SV=1	sp|Q9CZB0|C560_MOUSE	18	0.000403136	0.000429252	0.000802304	0.000454722	0.00060525	0.000739662	0.00112989	0.000662906	0.000522354	0.000784426
Protein FAM136A OS=Mus musculus OX=10090 GN=Fam136a PE=1 SV=1	sp|Q9CR98|F136A_MOUSE	16	0.000453528	0.000965818	0.00075216	0.000852604	0.000510679	0.000970806	0.0010169	0.000497179	0.000756027	0.000748891
GTP-binding nuclear protein Ran OS=Mus musculus OX=10090 GN=Ran PE=1 SV=3	sp|P62827|RAN_MOUSE	24	0.000604704	0.000536565	0.000401152	0.000341042	0.000567422	0.000277373	0.000423708	0.00107722	0.000470866	0.000586431
Citramalyl-CoA lyase, mitochondrial OS=Mus musculus OX=10090 GN=Clybl PE=1 SV=2	sp|Q8R4N0|CLYBL_MOUSE	38	0.000477398	0.000271107	0.000253359	0.000287193	0.000286697	0.000291972	0.000374647	0.000261673	0.000322264	0.000303747
Acyl carrier protein, mitochondrial OS=Mus musculus OX=10090 GN=Ndufab1 PE=1 SV=1	sp|Q9CR21|ACPM_MOUSE	17	0.0008537	0.000606003	0.000707915	0.000481471	0.000801066	0.000783171	0.00047854	0.000467933	0.000662272	0.000632678
Isobutyryl-CoA dehydrogenase, mitochondrial OS=Mus musculus OX=10090 GN=Acad8 PE=1 SV=2	sp|Q9D7B6|ACAD8_MOUSE	45	0.000241882	0.000228935	0.000160461	0.000242519	0.000302625	0.000345175	0.000361564	0.000397743	0.000218449	0.000351777
Ig kappa chain V-V region MOPC 41 OS=Mus musculus OX=10090 GN=Gm5571 PE=1 SV=1	sp|P01639|KV5A7_MOUSE	14	0.000518318	0.000735861	0.000515767	0.00116929	0	0.000633996	0.000435814	0.000710256	0.000734808	0.000445016
Ig kappa chain V-V region L7 (Fragment) OS=Mus musculus OX=10090 GN=Gm10881 PE=1 SV=1	sp|P01642|KV5A9_MOUSE	13	0.000837283	0.000396233	0.000740588	0.00125923	0.000628528	0.000341382	0.000625784	0	0.000808334	0.000398924
Mitochondrial import inner membrane translocase subunit TIM50 OS=Mus musculus OX=10090 GN=Timm50 PE=1 SV=1	sp|Q9D880|TIM50_MOUSE	40	0.000272117	0	0	0.000136417	0.000204272	0.000166424	0.00020338	0.000198872	0.000102133	0.000193237
Laminin subunit beta-1 OS=Mus musculus OX=10090 GN=Lamb1 PE=1 SV=3	sp|P02469|LAMB1_MOUSE	197	0	0	0	0	5.5302e-05	0	0	0	0	1.38255e-05
Serpin B6 OS=Mus musculus OX=10090 GN=Serpinb6 PE=1 SV=1	sp|Q60854|SPB6_MOUSE	43	0.000253132	0.000179687	0.000279873	0.000253798	0.0003167	0.000206417	0.000283786	0.000277495	0.000241623	0.0002711
Glutaryl-CoA dehydrogenase, mitochondrial OS=Mus musculus OX=10090 GN=Gcdh PE=1 SV=2	sp|Q60759|GCDH_MOUSE	49	0.000148091	0	0.000147362	0.000111361	0.000166752	0.000135856	0.000166024	0.000121758	0.000101703	0.000147598
39S ribosomal protein L12, mitochondrial OS=Mus musculus OX=10090 GN=Mrpl12 PE=1 SV=2	sp|Q9DB15|RM12_MOUSE	22	0.000659677	0.000351206	0.00043762	0.00024803	0.000742806	0.000605178	0.000647117	0.000361585	0.000424134	0.000589172
Aldo-keto reductase family 1 member B1 OS=Mus musculus OX=10090 GN=Akr1b1 PE=1 SV=3	sp|P45376|ALDR_MOUSE	36	0.000302352	0.00035771	0.000267435	0	0.000453937	0.000308192	0.000508449	0.000386695	0.000231874	0.000414318
Ras-related protein Rab-1B OS=Mus musculus OX=10090 GN=Rab1b PE=1 SV=1	sp|Q9D1G1|RAB1B_MOUSE	22	0	0	0	0	0.000495204	0.000605178	0.000647117	0.000542377	0	0.000572469
ADP-ribosylation factor 5 OS=Mus musculus OX=10090 GN=Arf5 PE=1 SV=2	sp|P84084|ARF5_MOUSE	21	0	0	0	0	0	0.000422664	0.00038739	0	0	0.000202513
Monocarboxylate transporter 1 OS=Mus musculus OX=10090 GN=Slc16a1 PE=1 SV=1	sp|P53986|MOT1_MOUSE	53	0	9.71892e-05	9.08268e-05	0.000102956	0.000205556	0.000251206	0.000345362	0.000262661	7.2743e-05	0.000266196
Glutathione S-transferase Mu 1 OS=Mus musculus OX=10090 GN=Gstm1 PE=1 SV=2	sp|P10649|GSTM1_MOUSE	26	0.000279094	0.000396233	0.000462867	0.000419744	0.000209509	0.000341382	0.000625784	0.000382446	0.000389485	0.00038978
High mobility group protein HMG-I/HMG-Y OS=Mus musculus OX=10090 GN=Hmga1 PE=1 SV=4	sp|P17095|HMGA1_MOUSE	12	0.00151176	0.000643878	0.00100288	0.000682083	0.00113484	0.000739662	0.000508449	0.000662906	0.00096015	0.000761465
60S ribosomal protein L13a OS=Mus musculus OX=10090 GN=Rpl13a PE=1 SV=4	sp|P19253|RL13A_MOUSE	23	0	0	0.000209297	0	0.000236837	0	0.000530556	0.000518796	5.23242e-05	0.000321547
Coatomer subunit alpha OS=Mus musculus OX=10090 GN=Copa PE=1 SV=2	sp|Q8CIE6|COPA_MOUSE	138	0	3.73263e-05	6.97655e-05	7.90821e-05	5.92092e-05	9.64776e-05	7.36883e-05	0.000100877	4.65435e-05	8.2563e-05
Guanine nucleotide-binding protein G(I)/G(S)/G(T) subunit beta-2 OS=Mus musculus OX=10090 GN=Gnb2 PE=1 SV=3	sp|P62880|GBB2_MOUSE	37	0.00029418	0.000208825	0.000260207	0.000294955	0.000294446	0.000359835	0.000384772	0.000537491	0.000264542	0.000394136
Prostamide/prostaglandin F synthase OS=Mus musculus OX=10090 GN=Prxl2b PE=1 SV=1	sp|Q9DB60|PXL2B_MOUSE	22	0.000494758	0.000468275	0.000328215	0	0.000742806	0.000605178	0.000647117	0.000361585	0.000322812	0.000589172
NADH dehydrogenase [ubiquinone] 1 beta subcomplex subunit 6 OS=Mus musculus OX=10090 GN=Ndufb6 PE=1 SV=3	sp|Q3UIU2|NDUB6_MOUSE	16	0	0.000321939	0.000601728	0	0.000851132	0.000832119	0.00139824	0.00111865	0.000230917	0.00105004
Glutaredoxin-3 OS=Mus musculus OX=10090 GN=Glrx3 PE=1 SV=1	sp|Q9CQM9|GLRX3_MOUSE	38	0.000286439	0.000338883	0.000316699	0.000430789	0.000358372	0.000291972	0.000321126	0.000209339	0.000343203	0.000295202
Platelet glycoprotein 4 OS=Mus musculus OX=10090 GN=Cd36 PE=1 SV=2	sp|Q08857|CD36_MOUSE	53	0	0.000145784	9.08268e-05	0.000102956	0	0	0	0.000187615	8.48917e-05	4.69037e-05
60S ribosomal protein L22 OS=Mus musculus OX=10090 GN=Rpl22 PE=1 SV=2	sp|P67984|RL22_MOUSE	15	0.000725645	0.000858505	0.000481382	0	0.000544725	0.000739662	0.000542346	0.000662906	0.000516383	0.000622409
Short-chain specific acyl-CoA dehydrogenase, mitochondrial OS=Mus musculus OX=10090 GN=Acads PE=1 SV=2	sp|Q07417|ACADS_MOUSE	45	0.000241882	0.000228935	0.000267435	0.000242519	0.000302625	0.000295865	0.000361564	0.000309356	0.000245192	0.000317352
Acyl-coenzyme A thioesterase 2, mitochondrial OS=Mus musculus OX=10090 GN=Acot2 PE=1 SV=2	sp|Q9QYR9|ACOT2_MOUSE	50	0	0	0.000192553	0	0.000326835	0.000266278	0.000366083	0.000238646	4.81382e-05	0.000299461
Ras-related protein Rab-10 OS=Mus musculus OX=10090 GN=Rab10 PE=1 SV=1	sp|P61027|RAB10_MOUSE	23	0	0.000335937	0.000313945	0.000237246	0.000592092	0.00038591	0.000618982	0.000345864	0.000221782	0.000485712
Prohibitin OS=Mus musculus OX=10090 GN=Phb PE=1 SV=1	sp|P67778|PHB_MOUSE	30	0.000483763	0.000515103	0.000320921	0.000454722	0.000453937	0.000221899	0.000271173	0.000198872	0.000443627	0.00028647
39S ribosomal protein L14, mitochondrial OS=Mus musculus OX=10090 GN=Mrpl14 PE=1 SV=1	sp|Q9D1I6|RM14_MOUSE	16	0.000680292	0.000643878	0.00075216	0.000852604	0.000851132	0.000970806	0.000635562	0.000621474	0.000732234	0.000769743
Phosphoglycerate mutase 1 OS=Mus musculus OX=10090 GN=Pgam1 PE=1 SV=3	sp|Q9DBJ1|PGAM1_MOUSE	29	0.000625556	0	0	0	0	0	0	0.000685764	0.000156389	0.000171441
Lysozyme C-1 OS=Mus musculus OX=10090 GN=Lyz1 PE=1 SV=1	sp|P17897|LYZ1_MOUSE	17	0	0.000606003	0.000707915	0.000641961	0.000320426	0.000261057	0	0.000233967	0.00048897	0.000203863
Collagen alpha-2(I) chain OS=Mus musculus OX=10090 GN=Col1a2 PE=1 SV=2	sp|Q01149|CO1A2_MOUSE	130	0	0	0	0	8.38038e-05	0	3.12892e-05	9.17869e-05	0	5.172e-05
Glutamine amidotransferase-like class 1 domain-containing protein 3A, mitochondrial OS=Mus musculus OX=10090 GN=Gatd3a PE=1 SV=1	sp|Q9D172|GAL3A_MOUSE	28	0.000518318	0.000367931	0.000171922	0	0.000486361	0.000475497	0.000435814	0.000426154	0.000264543	0.000455956
ATPase family AAA domain-containing protein 3 OS=Mus musculus OX=10090 GN=Atad3 PE=1 SV=1	sp|Q925I1|ATAD3_MOUSE	67	0	0.000153762	0.000143696	8.14428e-05	0	0.000165596	0.000242841	0.000207776	9.47252e-05	0.000154053
60S ribosomal protein L34 OS=Mus musculus OX=10090 GN=Rpl34 PE=1 SV=2	sp|Q9D1R9|RL34_MOUSE	13	0.00139547	0.0011887	0.000925735	0.000629615	0.000628528	0.000853456	0.00109512	0.000458935	0.00103488	0.00075901
NADH dehydrogenase [ubiquinone] 1 beta subcomplex subunit 5, mitochondrial OS=Mus musculus OX=10090 GN=Ndufb5 PE=1 SV=1	sp|Q9CQH3|NDUB5_MOUSE	22	0.000659677	0.000351206	0.00043762	0	0.000495204	0.000605178	0.000647117	0.000451981	0.000362126	0.00054987
Eukaryotic initiation factor 4A-I OS=Mus musculus OX=10090 GN=Eif4a1 PE=1 SV=1	sp|P60843|IF4A1_MOUSE	46	0.000157749	0	0	0.000177935	0	0.000241194	0.000221065	0.000475563	8.39209e-05	0.000234455
40S ribosomal protein S26 OS=Mus musculus OX=10090 GN=Rps26 PE=1 SV=3	sp|P62855|RS26_MOUSE	13	0.000837283	0.000792466	0.000740588	0.000629615	0.000838038	0.000853456	0.000625784	0.000764891	0.000749988	0.000770542
Polyadenylate-binding protein 2 OS=Mus musculus OX=10090 GN=Pabpn1 PE=1 SV=3	sp|Q8CCS6|PABP2_MOUSE	32	0.00056691	0.000321939	0.000300864	0.000511563	0.000595793	0.00020803	0.000381337	0.000310737	0.000425319	0.000373974
Lipoprotein lipase OS=Mus musculus OX=10090 GN=Lpl PE=1 SV=3	sp|P11152|LIPL_MOUSE	53	0.000205371	0.000291568	0.00027248	0.000102956	0.000256946	0.000251206	0.000153494	0.000187615	0.000218094	0.000212315
Selenium-binding protein 2 OS=Mus musculus OX=10090 GN=Selenbp2 PE=1 SV=2	sp|Q63836|SBP2_MOUSE	53	0.0004792	0.000194378	0.00013624	0.000154434	0.000256946	0.000125603	0.000230241	0.000262661	0.000241063	0.000218863
E3 ubiquitin-protein ligase RBX1 OS=Mus musculus OX=10090 GN=Rbx1 PE=1 SV=1	sp|P62878|RBX1_MOUSE	12	0	0.00107313	0.000802304	0.000909444	0	0.000924577	0.000847415	0.000828632	0.00069622	0.000650156
60S ribosomal protein L37a OS=Mus musculus OX=10090 GN=Rpl37a PE=1 SV=2	sp|P61514|RL37A_MOUSE	10	0.000725645	0.000772654	0.00144415	0.000545667	0.000544725	0.000665696	0.000406759	0.000596615	0.000872028	0.000553449
60S ribosomal protein L10a OS=Mus musculus OX=10090 GN=Rpl10a PE=1 SV=3	sp|P53026|RL10A_MOUSE	25	0.000290258	0.000309062	0.000481382	0.000218267	0.000326835	0	0.000244056	0.000318195	0.000324742	0.000222271
Caveolin-1 OS=Mus musculus OX=10090 GN=Cav1 PE=1 SV=1	sp|P49817|CAV1_MOUSE	21	0.000345545	0.000367931	0.000343844	0	0.000389089	0.000633996	0.000484237	0.000378803	0.00026433	0.000471531
Prostaglandin reductase-3 OS=Mus musculus OX=10090 GN=Zadh2 PE=1 SV=1	sp|Q8BGC4|PTGR3_MOUSE	41	0.00026548	0.00025127	0	0	0.000332149	0.000378851	0.000297629	0.000436548	0.000129187	0.000361294
Obscurin OS=Mus musculus OX=10090 GN=Obscn PE=1 SV=3	sp|A2AAJ9|OBSCN_MOUSE	967	0	0	0	0	1.40829e-05	0	0	6.16975e-06	0	5.06315e-06
Ig lambda-1 chain V region S178 OS=Mus musculus OX=10090 PE=1 SV=1	sp|P01725|LV1C_MOUSE	12	0	0.000429252	0.000802304	0.000682083	0	0.000369831	0.000508449	0.000828632	0.00047841	0.000426728
Cardiac phospholamban OS=Mus musculus OX=10090 GN=Pln PE=1 SV=1	sp|P61014|PPLA_MOUSE	6	0	0	0	0	0	0.00184915	0.00135586	0	0	0.000801255
Branched-chain-amino-acid aminotransferase, mitochondrial OS=Mus musculus OX=10090 GN=Bcat2 PE=1 SV=2	sp|O35855|BCAT2_MOUSE	44	0.000164919	0.000234138	0.000109405	0.000186023	0.000185702	0.000100863	0.000323559	0.000271189	0.000173621	0.000220328
39S ribosomal protein L22, mitochondrial OS=Mus musculus OX=10090 GN=Mrpl22 PE=1 SV=1	sp|Q8BU88|RM22_MOUSE	24	0.000302352	0.000429252	0.000300864	0	0.000453937	0.000462289	0.000508449	0.000414316	0.000258117	0.000459748
Propionyl-CoA carboxylase beta chain, mitochondrial OS=Mus musculus OX=10090 GN=Pccb PE=1 SV=2	sp|Q99MN9|PCCB_MOUSE	58	0	0.000133216	0.000124495	0	0.000234795	7.65167e-05	0.000210393	0.000171441	6.44279e-05	0.000173286
Methylmalonic aciduria type A homolog, mitochondrial OS=Mus musculus OX=10090 GN=Mmaa PE=1 SV=1	sp|Q8C7H1|MMAA_MOUSE	46	0.000236623	0.000279947	0.000156972	0.000118623	0.000414464	0.000241194	0.000265278	0.000172932	0.000198042	0.000273467
Cytochrome c oxidase subunit 7A1, mitochondrial OS=Mus musculus OX=10090 GN=Cox7a1 PE=1 SV=1	sp|P56392|CX7A1_MOUSE	9	0.00201568	0.00143084	0.00133717	0.00181889	0.00181575	0.000986216	0	0.000883874	0.00165065	0.00092146
Protein phosphatase 1 regulatory subunit 12B OS=Mus musculus OX=10090 GN=Ppp1r12b PE=1 SV=2	sp|Q8BG95|MYPT2_MOUSE	109	0	0	0	0	0	0	0	3.64902e-05	0	9.12255e-06
Epiplakin OS=Mus musculus OX=10090 GN=Eppk1 PE=1 SV=2	sp|Q8R0W0|EPIPL_MOUSE	725	3.50311e-05	0	0	0	0	0	0	0	8.75778e-06	0
Receptor of activated protein C kinase 1 OS=Mus musculus OX=10090 GN=Rack1 PE=1 SV=3	sp|P68040|RACK1_MOUSE	35	0.000310991	0.000294344	0	0.000155905	0.000466907	0.000316998	0.000174325	0.000511384	0.00019031	0.000367404
60S ribosomal protein L14 OS=Mus musculus OX=10090 GN=Rpl14 PE=1 SV=3	sp|Q9CR57|RL14_MOUSE	24	0.000453528	0.000321939	0.00050144	0.000454722	0.000567422	0.000369831	0.000338966	0.000414316	0.000432907	0.000422634
F-actin-capping protein subunit beta OS=Mus musculus OX=10090 GN=Capzb PE=1 SV=3	sp|P47757|CAPZB_MOUSE	31	0.000351119	0.00074773	0	0.000440054	0.000702871	0	0	0.000192456	0.000384726	0.000223832
EH domain-containing protein 1 OS=Mus musculus OX=10090 GN=Ehd1 PE=1 SV=1	sp|Q9WVK4|EHD1_MOUSE	61	0	0	0	0.00013418	0.000133949	0.00010913	0	0.000130408	3.35451e-05	9.33717e-05
ATP-dependent RNA helicase DDX3Y OS=Mus musculus OX=10090 GN=Ddx3y PE=1 SV=2	sp|Q62095|DDX3Y_MOUSE	73	9.94034e-05	0.000105843	6.59428e-05	0.000186872	0.000223859	0.000121588	0.000167161	0.000217942	0.000114515	0.000182638
Ig lambda-1 chain V region OS=Mus musculus OX=10090 PE=1 SV=2	sp|P01723|LV1A_MOUSE (+1)	12	0	0	0	0	0	0.000739662	0	0.000497179	0	0.00030921
Protein FAM210A OS=Mus musculus OX=10090 GN=Fam210a PE=1 SV=1	sp|Q8BGY7|F210A_MOUSE	32	0	0.000241454	0	0	0.000170226	0.000485403	0.000444893	0.00024859	6.03636e-05	0.000337278
Histone H1.3 OS=Mus musculus OX=10090 GN=H1-3 PE=1 SV=2	sp|P43277|H13_MOUSE	22	0	0	0.00021881	0.00024803	0.000247602	0.000403452	0.000554672	0.000813566	0.00011671	0.000504823
28S ribosomal protein S36, mitochondrial OS=Mus musculus OX=10090 GN=Mrps36 PE=1 SV=1	sp|Q9CQX8|RT36_MOUSE	11	0	0	0.00087524	0.000496061	0.000742806	0.00100863	0.00147912	0.00072317	0.000342825	0.000988433
Transforming protein RhoA OS=Mus musculus OX=10090 GN=Rhoa PE=1 SV=1	sp|Q9QUI0|RHOA_MOUSE	22	0.000329839	0.000351206	0	0	0.000371403	0.000403452	0.000554672	0.000542377	0.000170261	0.000467976
Actin-binding LIM protein 1 OS=Mus musculus OX=10090 GN=Ablim1 PE=1 SV=1	sp|Q8K4G5|ABLM1_MOUSE	97	0	7.96551e-05	0	8.43814e-05	0.00019655	0	0	8.20089e-05	4.10091e-05	6.96398e-05
60S ribosomal protein L21 OS=Mus musculus OX=10090 GN=Rpl21 PE=1 SV=3	sp|O09167|RL21_MOUSE	19	0	0.00040666	0.000253359	0.000430789	0.000430046	0.000350366	0.000321126	0.000209339	0.000272702	0.000327719
[Pyruvate dehydrogenase (acetyl-transferring)] kinase isozyme 2, mitochondrial OS=Mus musculus OX=10090 GN=Pdk2 PE=1 SV=2	sp|Q9JK42|PDK2_MOUSE	46	0	0	0	0.000177935	0.000236837	0.000192955	0.000132639	0.000216165	4.44837e-05	0.000194649
Transthyretin OS=Mus musculus OX=10090 GN=Ttr PE=1 SV=1	sp|P07309|TTHY_MOUSE	16	0.000680292	0.000643878	0.000451296	0.000511563	0.000510679	0.000554746	0.000635562	0.000497179	0.000571757	0.000549542
Mitochondrial import inner membrane translocase subunit TIM44 OS=Mus musculus OX=10090 GN=Timm44 PE=1 SV=2	sp|O35857|TIM44_MOUSE	51	0	0	0.000141583	0.00016049	0.000160213	0.000261057	0.00023927	0.00035095	7.55183e-05	0.000252873
NADH dehydrogenase [ubiquinone] flavoprotein 3, mitochondrial OS=Mus musculus OX=10090 GN=Ndufv3 PE=1 SV=1	sp|Q8BK30|NDUV3_MOUSE	12	0	0	0.00120346	0.000682083	0.000907874	0.000554746	0.00118638	0.000662906	0.000471385	0.000827977
Plectin OS=Mus musculus OX=10090 GN=Plec PE=1 SV=3	sp|Q9QXS1|PLEC_MOUSE	534	5.43554e-05	0	0	0	0	0	0	0	1.35889e-05	0
Poly(rC)-binding protein 1 OS=Mus musculus OX=10090 GN=Pcbp1 PE=1 SV=1	sp|P60335|PCBP1_MOUSE	37	0.00019612	0.000208825	0.000195155	0.000221216	0.000294446	0.00023989	0.00021987	0.000483742	0.000205329	0.000309487
Serotransferrin OS=Mus musculus OX=10090 GN=Tf PE=1 SV=1	sp|Q921I1|TRFE_MOUSE	77	0	0.000133793	0.000187551	7.08658e-05	0.000141487	0.000115272	0.000132065	0.00010331	9.80526e-05	0.000123033
Ras-related protein Rab-1A OS=Mus musculus OX=10090 GN=Rab1A PE=1 SV=3	sp|P62821|RAB1A_MOUSE	23	0	0	0	0	0.000473674	0	0.000530556	0	0	0.000251057
Heterogeneous nuclear ribonucleoprotein H OS=Mus musculus OX=10090 GN=Hnrnph1 PE=1 SV=3	sp|O35737|HNRH1_MOUSE	49	0	0	0	0	0	0	8.30121e-05	8.11721e-05	0	4.10461e-05
Troponin C, slow skeletal and cardiac muscles OS=Mus musculus OX=10090 GN=Tnnc1 PE=1 SV=1	sp|P19123|TNNC1_MOUSE	18	0.000604704	0.000858505	0	0	0	0.000369831	0	0.000331453	0.000365802	0.000175321
Dystrophin OS=Mus musculus OX=10090 GN=Dmd PE=1 SV=3	sp|P11531|DMD_MOUSE	426	0	2.41832e-05	2.26001e-05	2.56182e-05	2.55739e-05	1.56267e-05	0	1.4005e-05	1.81004e-05	1.38014e-05
40S ribosomal protein S8 OS=Mus musculus OX=10090 GN=Rps8 PE=1 SV=2	sp|P62242|RS8_MOUSE	24	0.000604704	0.000643878	0.000200576	0.000454722	0.000453937	0.000184915	0.000169483	0.000580042	0.00047597	0.000347095
Prostaglandin E synthase 2 OS=Mus musculus OX=10090 GN=Ptges2 PE=1 SV=3	sp|Q8BWM0|PGES2_MOUSE	43	0.000168755	0.000299478	0	0.000253798	0.00019002	0.000206417	0.00018919	0.000138748	0.000180508	0.000181094
Annexin A1 OS=Mus musculus OX=10090 GN=Anxa1 PE=1 SV=2	sp|P10107|ANXA1_MOUSE	39	0.000465157	0.000858505	0	0.000139915	0.000279346	0.000170691	0	0	0.000365894	0.000112509
Dynein light chain 2, cytoplasmic OS=Mus musculus OX=10090 GN=Dynll2 PE=1 SV=1	sp|Q9D0M5|DYL2_MOUSE	10	0.00108847	0.00103021	0.000962764	0.00136417	0.00108945	0.000887594	0.000813519	0.000596615	0.0011114	0.000846794
Heterogeneous nuclear ribonucleoprotein A1 OS=Mus musculus OX=10090 GN=Hnrnpa1 PE=1 SV=2	sp|P49312|ROA1_MOUSE	34	0	0	0	0	0	0	0	0.000935867	0	0.000233967
Protein NDRG2 OS=Mus musculus OX=10090 GN=Ndrg2 PE=1 SV=1	sp|Q9QYG0|NDRG2_MOUSE	41	0	0	0	0.000133089	0.00013286	0.000108243	0.000198419	0	3.32724e-05	0.000109881
Carnitine O-palmitoyltransferase 2, mitochondrial OS=Mus musculus OX=10090 GN=Cpt2 PE=1 SV=2	sp|P52825|CPT2_MOUSE	74	0	6.96085e-05	9.75775e-05	0	0.000147223	0.000119945	8.24512e-05	8.06237e-05	4.17965e-05	0.000107561
Calcium/calmodulin-dependent protein kinase type II subunit delta OS=Mus musculus OX=10090 GN=Camk2d PE=1 SV=1	sp|Q6PHZ2|KCC2D_MOUSE	56	0	0.000137974	0.000128942	0.000146161	0.000243181	0.000158499	0.000217907	0.00024859	0.000103269	0.000217044
Hexokinase HKDC1 OS=Mus musculus OX=10090 GN=Hkdc1 PE=2 SV=1	sp|Q91W97|HKDC1_MOUSE	102	0	0	0	0	0	0	7.97567e-05	0	0	1.99392e-05
Ryanodine receptor 1 OS=Mus musculus OX=10090 GN=Ryr1 PE=1 SV=1	sp|E9PZQ0|RYR1_MOUSE	565	0	9.11686e-06	0	0	0	0	0	0	2.27922e-06	0
NADH dehydrogenase [ubiquinone] 1 alpha subcomplex subunit 11 OS=Mus musculus OX=10090 GN=Ndufa11 PE=1 SV=2	sp|Q9D8B4|NDUAB_MOUSE	15	0.000483763	0.000343402	0.000481382	0.000363778	0	0.000443797	0.000949105	0.000928068	0.000418081	0.000580243
60S ribosomal protein L9 OS=Mus musculus OX=10090 GN=Rpl9 PE=2 SV=2	sp|P51410|RL9_MOUSE	22	0.000329839	0	0.00021881	0.000496061	0.000247602	0.000201726	0.000277336	0.000451981	0.000261177	0.000294661
Protein S100-A11 OS=Mus musculus OX=10090 GN=S100a11 PE=1 SV=1	sp|P50543|S10AB_MOUSE	11	0.00197903	0.000702413	0	0	0.000990409	0.000605178	0.000554672	0.00072317	0.000670361	0.000718357
Alpha-mannosidase 2C1 OS=Mus musculus OX=10090 GN=Man2c1 PE=1 SV=1	sp|Q91W89|MA2C1_MOUSE	116	0	6.66081e-05	8.29969e-05	0.000141121	0.000117398	5.73875e-05	8.76637e-05	5.14323e-05	7.26814e-05	7.84703e-05
60S ribosomal protein L24 OS=Mus musculus OX=10090 GN=Rpl24 PE=1 SV=2	sp|Q8BP67|RL24_MOUSE	18	0.000403136	0.000286168	0.000534869	0.000303148	0.000302625	0.000493108	0.000564944	0	0.00038183	0.000340169
ATP synthase subunit delta, mitochondrial OS=Mus musculus OX=10090 GN=Atp5f1d PE=1 SV=1	sp|Q9D3D9|ATPD_MOUSE	18	0.000403136	0.000286168	0.000267435	0.000303148	0.000302625	0.000493108	0.000451955	0.000220969	0.000314972	0.000367164
Cytochrome c oxidase subunit 6A2, mitochondrial OS=Mus musculus OX=10090 GN=Cox6a2 PE=1 SV=2	sp|P43023|CX6A2_MOUSE	11	0	0	0	0.000496061	0	0	0	0	0.000124015	0
Histidine ammonia-lyase OS=Mus musculus OX=10090 GN=Hal PE=1 SV=1	sp|P35492|HUTH_MOUSE	72	0.00025196	0	0	0	0	6.16385e-05	0	0	6.299e-05	1.54096e-05
Ig kappa chain V-II region 7S34.1 OS=Mus musculus OX=10090 PE=1 SV=1	sp|P01630|KV2A6_MOUSE	12	0.000604704	0.000643878	0.000401152	0.000682083	0.000453937	0.000739662	0.000508449	0.000497179	0.000582954	0.000549807
S-formylglutathione hydrolase OS=Mus musculus OX=10090 GN=Esd PE=1 SV=1	sp|Q9R0P3|ESTD_MOUSE	31	0	0.000166162	0.000310569	0.000440054	0.000439294	0	0.000131213	0.000320761	0.000229196	0.000222817
Fermitin family homolog 2 OS=Mus musculus OX=10090 GN=Fermt2 PE=1 SV=1	sp|Q8CIB5|FERM2_MOUSE	78	0	0	9.25735e-05	6.99573e-05	0.000139673	0.000113794	0.000156446	0.000101985	4.06327e-05	0.000127975
Elongation factor G, mitochondrial OS=Mus musculus OX=10090 GN=Gfm1 PE=1 SV=1	sp|Q8K0D5|EFGM_MOUSE	84	0	0	8.59611e-05	6.49603e-05	9.72723e-05	0.000105666	0.000242119	0.000142051	3.77304e-05	0.000146777
Caveolin-3 OS=Mus musculus OX=10090 GN=Cav3 PE=1 SV=1	sp|P51637|CAV3_MOUSE	17	0	0	0.000424749	0	0	0.000522114	0.000358905	0.000467933	0.000106187	0.000337238
Ig kappa chain V-V region MOPC 149 OS=Mus musculus OX=10090 PE=1 SV=1	sp|P01636|KV5A4_MOUSE	12	0	0.000429252	0	0	0	0.000554746	0.000338966	0.000331453	0.000107313	0.000306291
Ras-related protein Rab-21 OS=Mus musculus OX=10090 GN=Rab21 PE=1 SV=4	sp|P35282|RAB21_MOUSE	24	0.000302352	0.000321939	0.000200576	0.000227361	0	0	0	0.000165726	0.000263057	4.14316e-05
Nebulin-related-anchoring protein OS=Mus musculus OX=10090 GN=Nrap PE=1 SV=3	sp|Q80XB4|NRAP_MOUSE	196	0	0	0	0	0	0	4.15061e-05	5.07326e-05	0	2.30597e-05
Coiled-coil-helix-coiled-coil-helix domain-containing protein 1 OS=Mus musculus OX=10090 GN=Chchd1 PE=1 SV=1	sp|Q9CQA6|CHCH1_MOUSE	14	0.00129579	0.000367931	0.000687689	0.000779524	0.000583634	0.000475497	0.000581085	0.000568205	0.000782734	0.000552105
Presequence protease, mitochondrial OS=Mus musculus OX=10090 GN=Pitrm1 PE=1 SV=1	sp|Q8K411|PREP_MOUSE	117	9.30314e-05	6.60388e-05	0.000123431	0	9.31153e-05	7.58627e-05	5.21486e-05	5.09927e-05	7.06254e-05	6.80299e-05
Galectin-1 OS=Mus musculus OX=10090 GN=Lgals1 PE=1 SV=3	sp|P16045|LEG1_MOUSE	15	0	0	0.000802304	0	0.0007263	0.000739662	0.000677932	0.000928068	0.000200576	0.00076799
High affinity immunoglobulin gamma Fc receptor I OS=Mus musculus OX=10090 GN=Fcgr1 PE=1 SV=1	sp|P26151|FCGR1_MOUSE	45	0	0.000343402	0.000160461	0.000242519	0.00012105	0.000246554	0.000271173	0.000176775	0.000186595	0.000203888
NADH dehydrogenase [ubiquinone] 1 beta subcomplex subunit 1 OS=Mus musculus OX=10090 GN=Ndufb1 PE=1 SV=1	sp|P0DN34|NDUB1_MOUSE	7	0	0	0	0	0	0.000633996	0.00116217	0.000852307	0	0.000662118
HIG1 domain family member 1A, mitochondrial OS=Mus musculus OX=10090 GN=Higd1a PE=1 SV=1	sp|Q9JLR9|HIG1A_MOUSE	10	0	0.000772654	0.000722073	0.000545667	0.000817087	0.000887594	0.000406759	0.000596615	0.000510099	0.000677014
ATP synthase subunit a OS=Mus musculus OX=10090 GN=Mtatp6 PE=1 SV=1	sp|P00848|ATP6_MOUSE	25	0	0	0	0	0	0.000355038	0	0	0	8.87594e-05
Mitochondrial fission process protein 1 OS=Mus musculus OX=10090 GN=Mtfp1 PE=1 SV=1	sp|Q9CRB8|MTFP1_MOUSE	18	0	0.000429252	0	0	0.000302625	0.000493108	0.000790921	0.000552421	0.000107313	0.000534769
Ryanodine receptor 2 OS=Mus musculus OX=10090 GN=Ryr2 PE=1 SV=1	sp|E9Q401|RYR2_MOUSE	565	0	0	0	0	0	7.85481e-06	2.15978e-05	1.40794e-05	0	1.0883e-05
Ig heavy chain V region MOPC 47A OS=Mus musculus OX=10090 PE=1 SV=1	sp|P01786|HVM17_MOUSE	13	0	0.000594349	0	0.000419744	0.000419019	0.000341382	0	0.000458935	0.000253523	0.000304834
Fibrinogen gamma chain OS=Mus musculus OX=10090 GN=Fgg PE=1 SV=1	sp|Q8VCM7|FIBG_MOUSE	49	0.000148091	0.000210246	0	0	0.000333505	0.000135856	0.000124518	0.000162344	8.95842e-05	0.000189056
Elongation factor 1-gamma OS=Mus musculus OX=10090 GN=Eef1g PE=1 SV=3	sp|Q9D8N0|EF1G_MOUSE	50	0.000145129	0	0.000192553	0	0.00021789	0	0.000122028	0.00027842	8.44205e-05	0.000154585
ATPase family AAA domain-containing protein 1 OS=Mus musculus OX=10090 GN=Atad1 PE=1 SV=1	sp|Q9D5T0|ATAD1_MOUSE	41	0	0.000188452	0.000176115	0.000266179	0.00019929	0.000162365	0.000248024	0.000145516	0.000157687	0.000188799
Valine--tRNA ligase OS=Mus musculus OX=10090 GN=Vars1 PE=1 SV=1	sp|Q9Z1Q9|SYVC_MOUSE	140	0	0	0	0	5.83634e-05	4.75497e-05	5.81085e-05	8.52307e-05	0	6.23131e-05
Myosin light chain kinase 3 OS=Mus musculus OX=10090 GN=Mylk3 PE=1 SV=1	sp|Q3UIZ8|MYLK3_MOUSE	86	0	0.000119791	0.000139937	0	0	0.000154813	0.00018919	0.000115623	6.4932e-05	0.000114907
Heterogeneous nuclear ribonucleoprotein Q OS=Mus musculus OX=10090 GN=Syncrip PE=1 SV=2	sp|Q7TMK9|HNRPQ_MOUSE	70	0	0	0.000103153	7.79524e-05	0	0	8.71627e-05	0.000142051	4.52764e-05	5.73035e-05
NADH dehydrogenase [ubiquinone] 1 beta subcomplex subunit 11, mitochondrial OS=Mus musculus OX=10090 GN=Ndufb11 PE=1 SV=2	sp|O09111|NDUBB_MOUSE	17	0	0	0	0	0.000480639	0.000391586	0.00023927	0.00035095	0	0.000365611
BAG family molecular chaperone regulator 3 OS=Mus musculus OX=10090 GN=Bag3 PE=1 SV=2	sp|Q9JLV1|BAG3_MOUSE	62	0	0	0.000271748	0.000176022	0.000131788	7.15802e-05	6.56063e-05	0.000128304	0.000111942	9.93198e-05
Rho guanine nucleotide exchange factor 5 OS=Mus musculus OX=10090 GN=Arhgef5 PE=1 SV=1	sp|E9Q7D5|ARHG5_MOUSE	177	0	0	0	0	0	0.000100293	5.74519e-05	7.86498e-05	0	5.90987e-05
Cell division control protein 42 homolog OS=Mus musculus OX=10090 GN=Cdc42 PE=1 SV=2	sp|P60766|CDC42_MOUSE	21	0	0	0	0	0.000259393	0.000422664	0.000484237	0.000947008	0	0.000528325
MICOS complex subunit MIC13 OS=Mus musculus OX=10090 GN=Micos13 PE=1 SV=1	sp|Q8R404|MIC13_MOUSE	13	0	0	0.000555441	0.000629615	0.000628528	0.000682765	0.000625784	0.000458935	0.000296264	0.000599003
Nebulette OS=Mus musculus OX=10090 GN=Nebl PE=1 SV=1	sp|Q0II04|NEBL_MOUSE	52	0	9.90582e-05	0	0.000157404	0.000314264	0	0.000117334	0.000229467	6.41155e-05	0.000165267
F-actin-capping protein subunit alpha-2 OS=Mus musculus OX=10090 GN=Capza2 PE=1 SV=3	sp|P47754|CAZA2_MOUSE	33	0.000219892	0.000390229	0.000145873	0	0.000330136	0.000134484	0	0.000120528	0.000188999	0.000146287
Gap junction alpha-1 protein OS=Mus musculus OX=10090 GN=Gja1 PE=1 SV=2	sp|P23242|CXA1_MOUSE	43	0	0.000119791	0.000111949	0	0.00025336	0.000206417	0.000283786	0.000231246	5.79352e-05	0.000243702
Ras-related C3 botulinum toxin substrate 1 OS=Mus musculus OX=10090 GN=Rac1 PE=1 SV=1	sp|P63001|RAC1_MOUSE	21	0	0.000245287	0	0	0.000389089	0.000316998	0.00038739	0.000947008	6.13218e-05	0.000510121
Protein-cysteine N-palmitoyltransferase HHAT-like protein OS=Mus musculus OX=10090 GN=Hhatl PE=1 SV=2	sp|Q9D1G3|HHATL_MOUSE	56	0.000194369	9.19826e-05	0	0.000146161	0.000243181	0.000158499	0.000145271	0.000213077	0.000108128	0.000190007
Cullin-associated NEDD8-dissociated protein 2 OS=Mus musculus OX=10090 GN=Cand2 PE=1 SV=2	sp|Q6ZQ73|CAND2_MOUSE	136	0	5.68128e-05	8.84894e-05	0	6.00799e-05	0	8.97263e-05	7.31146e-05	3.63255e-05	5.57302e-05
Mitochondrial import receptor subunit TOM22 homolog OS=Mus musculus OX=10090 GN=Tomm22 PE=1 SV=3	sp|Q9CPQ3|TOM22_MOUSE	16	0.000453528	0.000321939	0	0.000341042	0.000340453	0.000693433	0.000635562	0.000497179	0.000279127	0.000541657
NADH dehydrogenase [ubiquinone] 1 beta subcomplex subunit 3 OS=Mus musculus OX=10090 GN=Ndufb3 PE=1 SV=1	sp|Q9CQZ6|NDUB3_MOUSE	12	0	0.000643878	0	0.000454722	0.000680906	0.000924577	0.000508449	0	0.00027465	0.000528483
60S ribosomal protein L17 OS=Mus musculus OX=10090 GN=Rpl17 PE=1 SV=3	sp|Q9CPR4|RL17_MOUSE	21	0	0.000490574	0.000458459	0	0	0	0	0.000189402	0.000237258	4.73504e-05
Ig kappa chain V-IV region S107B OS=Mus musculus OX=10090 PE=4 SV=1	sp|P01680|KV4A1_MOUSE	14	0	0.000551896	0	0	0	0.000475497	0.000435814	0	0.000137974	0.000227828
ATP-dependent RNA helicase DDX1 OS=Mus musculus OX=10090 GN=Ddx1 PE=1 SV=1	sp|Q91VR5|DDX1_MOUSE	83	0	0	0	0	6.56295e-05	5.34695e-05	0.000122518	0.000119802	0	9.03548e-05
Metaxin-2 OS=Mus musculus OX=10090 GN=Mtx2 PE=1 SV=1	sp|O88441|MTX2_MOUSE	30	0.000483763	0.000171701	0.000240691	0.000272833	0.000272362	0.000221899	0.000271173	0.000198872	0.000292247	0.000241076
Protein transport protein Sec31B OS=Mus musculus OX=10090 GN=Sec31b PE=1 SV=2	sp|Q3TZ89|SC31B_MOUSE	126	8.63863e-05	0	0	0	0	0	0	0	2.15966e-05	0
Alpha-1-antitrypsin 1-5 OS=Mus musculus OX=10090 GN=Serpina1e PE=1 SV=1	sp|Q00898|A1AT5_MOUSE	46	0.000157749	0	0.000156972	0.000118623	0.000236837	0.000192955	0.000132639	0.000172932	0.000108336	0.000183841
60S ribosomal protein L7 OS=Mus musculus OX=10090 GN=Rpl7 PE=1 SV=2	sp|P14148|RL7_MOUSE	31	0	0	0.000388211	0.000176022	0	0	0.000656063	0	0.000141058	0.000164016
Translationally-controlled tumor protein OS=Mus musculus OX=10090 GN=Tpt1 PE=1 SV=1	sp|P63028|TCTP_MOUSE	19	0	0.000542213	0	0	0.000430046	0.000233577	0.000642252	0.000523347	0.000135553	0.000457305
39S ribosomal protein L11, mitochondrial OS=Mus musculus OX=10090 GN=Mrpl11 PE=1 SV=1	sp|Q9CQF0|RM11_MOUSE	21	0.000345545	0.000490574	0.00022923	0.000259841	0.000648482	0.00052833	0.000581085	0.000189402	0.000331298	0.000486825
Ferritin light chain 1 OS=Mus musculus OX=10090 GN=Ftl1 PE=1 SV=2	sp|P29391|FRIL1_MOUSE	21	0	0.000367931	0.000343844	0	0.000259393	0.000633996	0.000677932	0.000378803	0.000177944	0.000487531
Guanine nucleotide-binding protein G(i) subunit alpha-2 OS=Mus musculus OX=10090 GN=Gnai2 PE=1 SV=5	sp|P08752|GNAI2_MOUSE	40	0	0	0	0.000136417	0.000136181	0.000166424	0.00020338	0.00024859	3.41042e-05	0.000188644
Kinesin-1 heavy chain OS=Mus musculus OX=10090 GN=Kif5b PE=1 SV=3	sp|Q61768|KINH_MOUSE	110	0	0	0	0	9.90409e-05	0.000121036	0.000166402	9.03962e-05	0	0.000119219
X-ray repair cross-complementing protein 5 OS=Mus musculus OX=10090 GN=Xrcc5 PE=1 SV=4	sp|P27641|XRCC5_MOUSE	83	0	0	0	0	0.000196888	0.000187143	0	0.000167723	0	0.000137939
[Pyruvate dehydrogenase (acetyl-transferring)] kinase isozyme 1, mitochondrial OS=Mus musculus OX=10090 GN=Pdk1 PE=1 SV=2	sp|Q8BFP9|PDK1_MOUSE	49	0	0	0	0	0	0	0	0.000121758	0	3.04395e-05
Fructose-bisphosphate aldolase C OS=Mus musculus OX=10090 GN=Aldoc PE=1 SV=4	sp|P05063|ALDOC_MOUSE	39	0	0	0	0	0	0	0	0.000203971	0	5.09927e-05
Sodium/potassium-transporting ATPase subunit beta-1 OS=Mus musculus OX=10090 GN=Atp1b1 PE=1 SV=1	sp|P14094|AT1B1_MOUSE	35	0.000207327	0.000220758	0.000137538	0.000155905	0	0.000126799	0.000232434	0.000397743	0.000180382	0.000189244
Mitochondrial fission 1 protein OS=Mus musculus OX=10090 GN=Fis1 PE=1 SV=1	sp|Q9CQ92|FIS1_MOUSE	17	0	0	0.000424749	0.00032098	0.000320426	0.000783171	0	0.000467933	0.000186432	0.000392883
N-acetylneuraminate 9-O-acetyltransferase OS=Mus musculus OX=10090 GN=Casd1 PE=2 SV=1	sp|Q7TN73|CASD1_MOUSE	92	0	8.39842e-05	7.84862e-05	5.93116e-05	0	0	6.63195e-05	4.3233e-05	5.54455e-05	2.73881e-05
Perilipin-4 OS=Mus musculus OX=10090 GN=Plin4 PE=1 SV=2	sp|O88492|PLIN4_MOUSE	139	0	0	5.19477e-05	3.92566e-05	0	6.38557e-05	5.85265e-05	5.72293e-05	2.28011e-05	4.49029e-05
NADH dehydrogenase [ubiquinone] 1 beta subcomplex subunit 7 OS=Mus musculus OX=10090 GN=Ndufb7 PE=1 SV=3	sp|Q9CR61|NDUB7_MOUSE	16	0	0	0.000300864	0	0.000510679	0.00041606	0.000381337	0.000621474	7.5216e-05	0.000482388
UPF0598 protein C8orf82 homolog OS=Mus musculus OX=10090 PE=1 SV=1	sp|Q8VE95|CH082_MOUSE	24	0.000302352	0	0.000300864	0.000341042	0.000340453	0.000277373	0.000338966	0.000331453	0.000236064	0.000322061
Plasminogen OS=Mus musculus OX=10090 GN=Plg PE=1 SV=3	sp|P20918|PLMN_MOUSE	91	7.97412e-05	0.000254721	0	0	0.00011972	0	0	4.37081e-05	8.36156e-05	4.08569e-05
Ras-related protein Rab-8A OS=Mus musculus OX=10090 GN=Rab8a PE=1 SV=2	sp|P55258|RAB8A_MOUSE	24	0	0	0	0	0	0.000184915	0.000254225	0	0	0.000109785
2-oxoisovalerate dehydrogenase subunit beta, mitochondrial OS=Mus musculus OX=10090 GN=Bckdhb PE=1 SV=2	sp|Q6P3A8|ODBB_MOUSE	43	0.000168755	0.000179687	0	0.000190349	0.00019002	0.000154813	0.000141893	0.000138748	0.000134698	0.000156368
28S ribosomal protein S9, mitochondrial OS=Mus musculus OX=10090 GN=Mrps9 PE=1 SV=3	sp|Q9D7N3|RT09_MOUSE	45	0	0.000228935	0.000160461	0.000121259	0.000181575	0.000197243	0.000180782	0.000220969	0.000127664	0.000195142
Moesin OS=Mus musculus OX=10090 GN=Msn PE=1 SV=3	sp|P26041|MOES_MOUSE	68	0	0	0	0	0	0	0	0.00035095	0	8.77375e-05
Envoplakin OS=Mus musculus OX=10090 GN=Evpl PE=1 SV=3	sp|Q9D952|EVPL_MOUSE	232	4.69167e-05	0	0	0	0	0	0	0	1.17292e-05	0
Collagen alpha-1(XV) chain OS=Mus musculus OX=10090 GN=Col15a1 PE=1 SV=2	sp|O35206|COFA1_MOUSE	140	7.77477e-05	0.000110379	3.43844e-05	5.84643e-05	0.000155636	0	0	0	7.02439e-05	3.89089e-05
60S ribosomal protein L35 OS=Mus musculus OX=10090 GN=Rpl35 PE=1 SV=1	sp|Q6ZWV7|RL35_MOUSE	15	0	0	0.000320921	0	0.00036315	0	0.000406759	0.000928068	8.02304e-05	0.000424494
ATP synthase subunit ATP5MPL, mitochondrial OS=Mus musculus OX=10090 GN=Atp5mpl PE=1 SV=1	sp|P56379|ATP68_MOUSE	7	0	0.00110379	0	0.00116929	0	0	0.00116217	0	0.000568269	0.000290542
Glutamine synthetase OS=Mus musculus OX=10090 GN=Glul PE=1 SV=6	sp|P15105|GLNA_MOUSE	42	0	0	0	0.000194881	0.000129696	0.000105666	0.000145271	0.000142051	4.87202e-05	0.000130671
Serine/threonine-protein phosphatase 2A catalytic subunit alpha isoform OS=Mus musculus OX=10090 GN=Ppp2ca PE=1 SV=1	sp|P63330|PP2AA_MOUSE	36	0.000403136	0.000214626	0	0	0.000302625	0.000184915	0.000169483	0.000110484	0.000154441	0.000191877
40S ribosomal protein S10 OS=Mus musculus OX=10090 GN=Rps10 PE=1 SV=1	sp|P63325|RS10_MOUSE	19	0.000381918	0.000271107	0	0	0.000573394	0.000350366	0.000321126	0	0.000163256	0.000311222
NADH dehydrogenase [ubiquinone] 1 alpha subcomplex subunit 3 OS=Mus musculus OX=10090 GN=Ndufa3 PE=1 SV=1	sp|Q9CQ91|NDUA3_MOUSE	9	0.000806272	0.000572336	0.000534869	0.000606296	0	0.000739662	0.000451955	0.000441937	0.000629944	0.000408388
Translational activator of cytochrome c oxidase 1 OS=Mus musculus OX=10090 GN=Taco1 PE=1 SV=1	sp|Q8K0Z7|TACO1_MOUSE	32	0.000340146	0.000241454	0	0.000255781	0.00025534	0	0.000190668	0.000186442	0.000209345	0.000158113
Polyadenylate-binding protein 1 OS=Mus musculus OX=10090 GN=Pabpc1 PE=1 SV=2	sp|P29341|PABP1_MOUSE	71	0	0	0	7.68545e-05	0	0	0	0	1.92136e-05	0
Coagulation factor XIII A chain OS=Mus musculus OX=10090 GN=F13a1 PE=1 SV=3	sp|Q8BH61|F13A_MOUSE	83	0	0	0	0	0.000131259	0.000133674	0.000122518	0.000143763	0	0.000132803
Profilin-1 OS=Mus musculus OX=10090 GN=Pfn1 PE=1 SV=2	sp|P62962|PROF1_MOUSE	15	0	0.000343402	0.000320921	0	0.000544725	0.000443797	0.000813519	0.000928068	0.000166081	0.000682527
NADH dehydrogenase [ubiquinone] 1 beta subcomplex subunit 9 OS=Mus musculus OX=10090 GN=Ndufb9 PE=1 SV=3	sp|Q9CQJ8|NDUB9_MOUSE	22	0	0	0	0	0.000371403	0.000201726	0.000739562	0	0	0.000328173
MAP/microtubule affinity-regulating kinase 3 OS=Mus musculus OX=10090 GN=Mark3 PE=1 SV=2	sp|Q03141|MARK3_MOUSE	84	0	0.000153304	5.73074e-05	6.49603e-05	0	5.2833e-05	4.84237e-05	0	6.8893e-05	2.53142e-05
Protein S100-A14 OS=Mus musculus OX=10090 GN=S100a14 PE=1 SV=1	sp|Q9D2Q8|S10AE_MOUSE	12	0.00120941	0.000643878	0.000401152	0.000682083	0.000453937	0.000369831	0.000338966	0	0.000734131	0.000290684
Macrophage migration inhibitory factor OS=Mus musculus OX=10090 GN=Mif PE=1 SV=2	sp|P34884|MIF_MOUSE	13	0	0	0	0.000419744	0	0	0.000312892	0.000305956	0.000104936	0.000154712
Complex I assembly factor ACAD9, mitochondrial OS=Mus musculus OX=10090 GN=Acad9 PE=1 SV=2	sp|Q8JZN5|ACAD9_MOUSE	69	0	7.46526e-05	0.000104648	7.90821e-05	7.89456e-05	6.43184e-05	5.89506e-05	8.6466e-05	6.45958e-05	7.21702e-05
Obg-like ATPase 1 OS=Mus musculus OX=10090 GN=Ola1 PE=1 SV=1	sp|Q9CZ30|OLA1_MOUSE	45	0	0	0	0	0	0	9.0391e-05	0	0	2.25977e-05
Phosphatidylethanolamine-binding protein 1 OS=Mus musculus OX=10090 GN=Pebp1 PE=1 SV=3	sp|P70296|PEBP1_MOUSE	21	0.000345545	0.000245287	0.000343844	0	0.000389089	0.000422664	0.000484237	0	0.000233669	0.000323998
Carbonyl reductase [NADPH] 1 OS=Mus musculus OX=10090 GN=Cbr1 PE=1 SV=3	sp|P48758|CBR1_MOUSE	31	0.000234079	0.000166162	0.000388211	0.000176022	0.000175718	0	0.000196819	0.000192456	0.000241119	0.000141248
Acetyl-CoA carboxylase 2 OS=Mus musculus OX=10090 GN=Acacb PE=1 SV=1	sp|E9Q4Z2|ACACB_MOUSE	276	0	0	0	0	0	0	0	4.3233e-05	0	1.08082e-05
Apolipoprotein A-I OS=Mus musculus OX=10090 GN=Apoa1 PE=1 SV=2	sp|Q00623|APOA1_MOUSE	31	0	0.000166162	0.000232927	0.000264032	0	0	0	0	0.00016578	0
Resistin-like gamma OS=Mus musculus OX=10090 GN=Retnlg PE=1 SV=1	sp|Q8K426|RETNG_MOUSE	13	0.000837283	0.000792466	0.000555441	0.000419744	0.000838038	0.000682765	0.000625784	0	0.000651233	0.000536647
Cytochrome c oxidase subunit 7A2, mitochondrial OS=Mus musculus OX=10090 GN=Cox7a2 PE=1 SV=2	sp|P48771|CX7A2_MOUSE	9	0	0	0.000802304	0.000606296	0.00151312	0.00123277	0.00135586	0.000441937	0.00035215	0.00113592
Endonuclease G, mitochondrial OS=Mus musculus OX=10090 GN=Endog PE=1 SV=1	sp|O08600|NUCG_MOUSE	32	0	0	0.000225648	0	0.000425566	0.00020803	0	0	5.6412e-05	0.000158399
Collagen alpha-1(I) chain OS=Mus musculus OX=10090 GN=Col1a1 PE=1 SV=4	sp|P11087|CO1A1_MOUSE	138	0	0	0	0	7.89456e-05	0	0	0	0	1.97364e-05
Basigin OS=Mus musculus OX=10090 GN=Bsg PE=1 SV=2	sp|P18572|BASI_MOUSE	42	0.000172773	0.000122644	0.000114615	0	0.000129696	0.000105666	0.000242119	0.000284102	0.000102508	0.000190396
40S ribosomal protein SA OS=Mus musculus OX=10090 GN=Rpsa PE=1 SV=4	sp|P14206|RSSA_MOUSE	33	0.000219892	0.000156092	0	0.000165354	0.000165068	0.000134484	0.00012326	0.000421849	0.000135334	0.000211165
E3 ubiquitin-protein ligase NEDD4 OS=Mus musculus OX=10090 GN=Nedd4 PE=1 SV=3	sp|P46935|NEDD4_MOUSE	103	0	7.5015e-05	4.67361e-05	0	7.93288e-05	6.46306e-05	5.92368e-05	3.86159e-05	3.04378e-05	6.0453e-05
Collagen alpha-1(IV) chain OS=Mus musculus OX=10090 GN=Col4a1 PE=1 SV=4	sp|P02463|CO4A1_MOUSE	161	4.50711e-05	6.39879e-05	4.48493e-05	5.08385e-05	3.38338e-05	0	0	2.47046e-05	5.11867e-05	1.46346e-05
28S ribosomal protein S6, mitochondrial OS=Mus musculus OX=10090 GN=Mrps6 PE=1 SV=3	sp|P58064|RT06_MOUSE	14	0	0.000551896	0.000343844	0.000389762	0.000583634	0.000475497	0.000581085	0.000426154	0.000321376	0.000516592
39S ribosomal protein L37, mitochondrial OS=Mus musculus OX=10090 GN=Mrpl37 PE=1 SV=1	sp|Q921S7|RM37_MOUSE	48	0	0	0	0	0	0.000184915	0.000169483	0.00024859	0	0.000150747
Fibrinogen beta chain OS=Mus musculus OX=10090 GN=Fgb PE=1 SV=1	sp|Q8K0E8|FIBB_MOUSE	55	0	0.000140483	0.000131286	0	0.000247602	0	0	0.000216951	6.79422e-05	0.000116138
Protein disulfide-isomerase OS=Mus musculus OX=10090 GN=P4hb PE=1 SV=2	sp|P09103|PDIA1_MOUSE	57	0	0	0	0	0	0	0	0.000174449	0	4.36122e-05
Ig heavy chain V regions TEPC 15/S107/HPCM1/HPCM2/HPCM3 OS=Mus musculus OX=10090 PE=1 SV=1	sp|P01787|HVM18_MOUSE (+3)	14	0.000518318	0.000735861	0	0	0.000389089	0.000316998	0.000290542	0.000426154	0.000313545	0.000355696
Actin-related protein 2/3 complex subunit 4 OS=Mus musculus OX=10090 GN=Arpc4 PE=1 SV=3	sp|P59999|ARPC4_MOUSE	20	0	0	0	0	0.000408544	0	0	0	0	0.000102136
3-hydroxyisobutyrate dehydrogenase, mitochondrial OS=Mus musculus OX=10090 GN=Hibadh PE=1 SV=1	sp|Q99L13|3HIDH_MOUSE	35	0	0.000294344	0.000137538	0.000155905	0	0.000190199	0.000348651	0.000113641	0.000146947	0.000163123
39S ribosomal protein L34, mitochondrial OS=Mus musculus OX=10090 GN=Mrpl34 PE=1 SV=1	sp|Q99N91|RM34_MOUSE	11	0.000989516	0.000468275	0.00043762	0.000496061	0.000495204	0.000605178	0.000369781	0.000542377	0.000597868	0.000503135
Elongation factor 1-delta OS=Mus musculus OX=10090 GN=Eef1d PE=1 SV=3	sp|P57776|EF1D_MOUSE	31	0	0.000166162	0	0	0.000351435	0.000214741	0.000328032	0.000320761	4.15405e-05	0.000303742
UDP-glucose:glycoprotein glucosyltransferase 1 OS=Mus musculus OX=10090 GN=Uggt1 PE=1 SV=4	sp|Q6P5E4|UGGG1_MOUSE	176	0	0	2.73513e-05	4.65057e-05	0	3.78236e-05	5.77783e-05	0	1.84642e-05	2.39005e-05
DnaJ homolog subfamily A member 3, mitochondrial OS=Mus musculus OX=10090 GN=Dnaja3 PE=1 SV=1	sp|Q99M87|DNJA3_MOUSE	52	0	0	0.00013886	0.00026234	0	0.000170691	0	0.000191223	0.0001003	9.04785e-05
Serine/threonine-protein phosphatase PP1-beta catalytic subunit OS=Mus musculus OX=10090 GN=Ppp1cb PE=1 SV=3	sp|P62141|PP1B_MOUSE	37	0.00019612	0.000139217	0	0	0.000368057	0.00023989	0.000274837	0.000107498	8.38343e-05	0.000247571
T-complex protein 1 subunit alpha OS=Mus musculus OX=10090 GN=Tcp1 PE=1 SV=3	sp|P11983|TCPA_MOUSE	60	0	0	0	0	0	7.39662e-05	0.000169483	0.000198872	0	0.00011058
60S ribosomal protein L36a OS=Mus musculus OX=10090 GN=Rpl36a PE=3 SV=2	sp|P83882|RL36A_MOUSE	12	0	0	0	0.000454722	0	0.000369831	0	0	0.000113681	9.24577e-05
Striated muscle-specific serine/threonine-protein kinase OS=Mus musculus OX=10090 GN=Speg PE=1 SV=2	sp|Q62407|SPEG_MOUSE	354	0	0	0	2.31215e-05	0	0	2.29808e-05	1.68535e-05	5.78037e-06	9.95857e-06
60S ribosomal protein L32 OS=Mus musculus OX=10090 GN=Rpl32 PE=1 SV=2	sp|P62911|RL32_MOUSE	16	0	0	0	0	0	0.00041606	0.000508449	0.00024859	0	0.000293275
Eukaryotic translation initiation factor 2 subunit 1 OS=Mus musculus OX=10090 GN=Eif2s1 PE=1 SV=3	sp|Q6ZWX6|IF2A_MOUSE	36	0	0	0.000200576	0	0.000226969	0	0.000225977	0.000220969	5.0144e-05	0.000168479
Collagen alpha-2(IV) chain OS=Mus musculus OX=10090 GN=Col4a2 PE=1 SV=4	sp|P08122|CO4A2_MOUSE	167	0	4.62667e-05	0	0	4.89274e-05	0	0	4.76339e-05	1.15667e-05	2.41403e-05
Nucleoside diphosphate-linked moiety X motif 8 OS=Mus musculus OX=10090 GN=Nudt8 PE=1 SV=1	sp|Q9CR24|NUDT8_MOUSE	23	0	0	0	0	0.000355255	0	0.00044213	0.000345864	0	0.000285812
Clustered mitochondria protein homolog OS=Mus musculus OX=10090 GN=Cluh PE=1 SV=2	sp|Q5SW19|CLU_MOUSE	148	0	0	4.87887e-05	3.68694e-05	0	5.99726e-05	4.12256e-05	6.71864e-05	2.14145e-05	4.20961e-05
Protein-L-isoaspartate(D-aspartate) O-methyltransferase OS=Mus musculus OX=10090 GN=Pcmt1 PE=1 SV=3	sp|P23506|PIMT_MOUSE	25	0.000580516	0.000309062	0.000770211	0.0003274	0	0	0	0	0.000496797	0
Beta-centractin OS=Mus musculus OX=10090 GN=Actr1b PE=1 SV=1	sp|Q8R5C5|ACTY_MOUSE	42	0	0.000122644	0	0	0.000194545	0.000158499	9.68475e-05	0.000284102	3.06609e-05	0.000183498
Mitochondrial proton/calcium exchanger protein OS=Mus musculus OX=10090 GN=Letm1 PE=1 SV=1	sp|Q9Z2I0|LETM1_MOUSE	83	0	0	0	0	0	5.34695e-05	0.000122518	9.58418e-05	0	6.79573e-05
5'-AMP-activated protein kinase subunit gamma-1 OS=Mus musculus OX=10090 GN=Prkag1 PE=1 SV=2	sp|O54950|AAKG1_MOUSE	38	0	0	0	0	0.000286697	0.000175183	0.000267605	0.000261673	0	0.00024779
Alpha-1-antitrypsin 1-1 OS=Mus musculus OX=10090 GN=Serpina1a PE=1 SV=4	sp|P07758|A1AT1_MOUSE (+1)	46	0	0	0.000156972	0.000177935	0	0	0	0.000129699	8.37268e-05	3.24247e-05
Fatty acid-binding protein 5 OS=Mus musculus OX=10090 GN=Fabp5 PE=1 SV=3	sp|Q05816|FABP5_MOUSE	15	0.000483763	0.000343402	0.000320921	0.000363778	0.00036315	0	0.000271173	0	0.000377966	0.000158581
40S ribosomal protein S15 OS=Mus musculus OX=10090 GN=Rps15 PE=1 SV=2	sp|P62843|RS15_MOUSE	17	0	0.000454502	0	0	0.000480639	0.000522114	0	0	0.000113626	0.000250688
Signal recognition particle 14 kDa protein OS=Mus musculus OX=10090 GN=Srp14 PE=1 SV=1	sp|P16254|SRP14_MOUSE	13	0.000837283	0	0.000740588	0	0.000419019	0.000512074	0.000312892	0.000305956	0.000394468	0.000387485
Mitochondrial import inner membrane translocase subunit Tim21 OS=Mus musculus OX=10090 GN=Timm21 PE=1 SV=2	sp|Q8CCM6|TIM21_MOUSE	28	0	0	0	0	0	0	0	0.000142051	0	3.55128e-05
Integrin-linked protein kinase OS=Mus musculus OX=10090 GN=Ilk PE=1 SV=2	sp|O55222|ILK_MOUSE	51	0	0.000202001	9.43887e-05	0	0.000160213	0	0.000199392	0.000116983	7.40974e-05	0.000119147
Tyrosine-protein phosphatase non-receptor type 11 OS=Mus musculus OX=10090 GN=Ptpn11 PE=1 SV=3	sp|P35235|PTN11_MOUSE	68	0	0	7.07915e-05	8.02451e-05	0.00012016	0.000130529	5.98176e-05	0	3.77591e-05	7.76265e-05
X-ray repair cross-complementing protein 6 OS=Mus musculus OX=10090 GN=Xrcc6 PE=1 SV=5	sp|P23475|XRCC6_MOUSE	69	0	0	0	0	0.000197364	0.000160796	8.84259e-05	0.000115288	0	0.000140468
Polyribonucleotide nucleotidyltransferase 1, mitochondrial OS=Mus musculus OX=10090 GN=Pnpt1 PE=1 SV=1	sp|Q8K1R3|PNPT1_MOUSE	86	0	0	0	0	0	0	9.45952e-05	0	0	2.36488e-05
Protein S100-A6 OS=Mus musculus OX=10090 GN=S100a6 PE=1 SV=3	sp|P14069|S10A6_MOUSE	10	0.00108847	0	0	0	0	0	0.000406759	0.000397743	0.000272117	0.000201126
28S ribosomal protein S5, mitochondrial OS=Mus musculus OX=10090 GN=Mrps5 PE=1 SV=1	sp|Q99N87|RT05_MOUSE	48	0	0.00016097	0	0.000170521	0	0	8.47415e-05	0.000124295	8.28726e-05	5.22591e-05
40S ribosomal protein S5 OS=Mus musculus OX=10090 GN=Rps5 PE=1 SV=3	sp|P97461|RS5_MOUSE	23	0	0.000223958	0	0	0.000355255	0.00038591	0.000265278	0	5.59894e-05	0.000251611
39S ribosomal protein L41, mitochondrial OS=Mus musculus OX=10090 GN=Mrpl41 PE=1 SV=1	sp|Q9CQN7|RM41_MOUSE	15	0.000483763	0	0	0	0	0.000443797	0.000406759	0.000397743	0.000120941	0.000312075
Glutamate dehydrogenase 1, mitochondrial OS=Mus musculus OX=10090 GN=Glud1 PE=1 SV=1	sp|P26443|DHE3_MOUSE	61	0	0	0.000118373	8.94536e-05	0.000133949	7.27536e-05	0.000100023	6.52038e-05	5.19566e-05	9.29822e-05
Malonyl-CoA decarboxylase, mitochondrial OS=Mus musculus OX=10090 GN=Mlycd PE=1 SV=1	sp|Q99J39|DCMC_MOUSE	55	0	0	0	0	0	0	0.000110934	0	0	2.77336e-05
Proteasome subunit alpha type-1 OS=Mus musculus OX=10090 GN=Psma1 PE=1 SV=1	sp|Q9R1P4|PSA1_MOUSE	30	0	0.000171701	0	0	0.000272362	0	0	0.000265162	4.29252e-05	0.000134381
Reticulon-2 OS=Mus musculus OX=10090 GN=Rtn2 PE=1 SV=1	sp|O70622|RTN2_MOUSE	51	0	0	0	0	0	0.000174038	0.000199392	7.79889e-05	0	0.000112855
Probable ATP-dependent RNA helicase DDX5 OS=Mus musculus OX=10090 GN=Ddx5 PE=1 SV=2	sp|Q61656|DDX5_MOUSE	69	0	0	0	0	0	0	0	5.7644e-05	0	1.4411e-05
28S ribosomal protein S27, mitochondrial OS=Mus musculus OX=10090 GN=Mrps27 PE=1 SV=2	sp|Q8BK72|RT27_MOUSE	48	0	0	0.000100288	0.000170521	0	0.000138687	0.000211854	0.000124295	6.77022e-05	0.000118709
Ig kappa chain V-II region VKappa167 OS=Mus musculus OX=10090 GN=Gm5153 PE=4 SV=1	sp|P01627|KV2A2_MOUSE	13	0.000558188	0.000594349	0.000555441	0	0	0.000512074	0.000469338	0.000611913	0.000426995	0.000398331
Dynamin-1-like protein OS=Mus musculus OX=10090 GN=Dnm1l PE=1 SV=2	sp|Q8K1M6|DNM1L_MOUSE	83	0	6.20606e-05	0	0	9.84442e-05	0	9.80143e-05	0.000119802	1.55151e-05	7.90652e-05
Dysferlin OS=Mus musculus OX=10090 GN=Dysf PE=1 SV=3	sp|Q9ESD7|DYSF_MOUSE	238	0	0	2.02261e-05	0	0	0	5.12722e-05	3.34238e-05	5.05654e-06	2.1174e-05
Maleylacetoacetate isomerase OS=Mus musculus OX=10090 GN=Gstz1 PE=1 SV=1	sp|Q9WVL0|MAAI_MOUSE	24	0	0	0	0	0	0	0	0.000414316	0	0.000103579
Inosine-5'-monophosphate dehydrogenase 2 OS=Mus musculus OX=10090 GN=Impdh2 PE=1 SV=2	sp|P24547|IMDH2_MOUSE	56	0	0	0	0	9.72723e-05	0.000237748	0.000145271	0.000213077	0	0.000173342
60S ribosomal protein L19 OS=Mus musculus OX=10090 GN=Rpl19 PE=1 SV=1	sp|P84099|RL19_MOUSE	23	0	0.000223958	0.000209297	0.000237246	0	0	0.000176852	0.000172932	0.000167625	8.7446e-05
Acyl-protein thioesterase 1 OS=Mus musculus OX=10090 GN=Lypla1 PE=1 SV=1	sp|P97823|LYPA1_MOUSE	25	0.000290258	0.000206041	0	0	0.000326835	0.000177519	0.000162704	0	0.000124075	0.000166764
Fumarylacetoacetate hydrolase domain-containing protein 2A OS=Mus musculus OX=10090 GN=Fahd2 PE=1 SV=1	sp|Q3TC72|FAHD2_MOUSE	35	0	0.000220758	0	0	0	0.000190199	0.000116217	0	5.51896e-05	7.66039e-05
Ankyrin-1 OS=Mus musculus OX=10090 GN=Ank1 PE=1 SV=2	sp|Q02357|ANK1_MOUSE	204	0	3.78752e-05	0	0	0	0	0	3.89944e-05	9.4688e-06	9.74861e-06
60S ribosomal protein L18 OS=Mus musculus OX=10090 GN=Rpl18 PE=1 SV=3	sp|P35980|RL18_MOUSE	22	0	0	0.00021881	0	0	0	0.000462227	0.000180792	5.47025e-05	0.000160755
Adenosylhomocysteinase OS=Mus musculus OX=10090 GN=Ahcy PE=1 SV=3	sp|P50247|SAHH_MOUSE	48	0	0	0	0.000170521	0.000170226	0	0	0	4.26302e-05	4.25566e-05
28S ribosomal protein S18a, mitochondrial OS=Mus musculus OX=10090 GN=Mrps18a PE=2 SV=1	sp|Q99N85|RT18A_MOUSE	22	0	0	0	0	0.000371403	0	0	0	0	9.28508e-05
28S ribosomal protein S26, mitochondrial OS=Mus musculus OX=10090 GN=Mrps26 PE=1 SV=1	sp|Q80ZS3|RT26_MOUSE	23	0	0	0.000313945	0	0	0	0.00044213	0.000345864	7.84862e-05	0.000196998
cAMP-dependent protein kinase catalytic subunit alpha OS=Mus musculus OX=10090 GN=Prkaca PE=1 SV=3	sp|P05132|KAPCA_MOUSE	41	0	0	0	0	0.00013286	0.000162365	0.000148814	0.000194021	0	0.000159515
Transmembrane protein 70, mitochondrial OS=Mus musculus OX=10090 GN=Tmem70 PE=2 SV=2	sp|Q921N7|TMM70_MOUSE	28	0	0	0	0	0	0.000237748	0	0.000213077	0	0.000112706
Ubiquinone biosynthesis O-methyltransferase, mitochondrial OS=Mus musculus OX=10090 GN=Coq3 PE=1 SV=1	sp|Q8BMS4|COQ3_MOUSE	41	0	0	0	0	0	0.000108243	0.000198419	0	0	7.66656e-05
Mitochondrial carrier homolog 2 OS=Mus musculus OX=10090 GN=Mtch2 PE=1 SV=1	sp|Q791V5|MTCH2_MOUSE	33	0	0	0.00021881	0	0.000247602	0	0.000184891	0.000241057	5.47025e-05	0.000168387
Dynactin subunit 3 OS=Mus musculus OX=10090 GN=Dctn3 PE=1 SV=2	sp|Q9Z0Y1|DCTN3_MOUSE	21	0	0.000367931	0	0	0.000389089	0.000422664	0.000193695	0.000378803	9.19826e-05	0.000346063
Sulfide:quinone oxidoreductase, mitochondrial OS=Mus musculus OX=10090 GN=Sqor PE=1 SV=3	sp|Q9R112|SQOR_MOUSE	50	0	0	9.62764e-05	0.000109133	0	8.87594e-05	0.000284732	0.000119323	5.13524e-05	0.000123203
Calpain-2 catalytic subunit OS=Mus musculus OX=10090 GN=Capn2 PE=1 SV=4	sp|O08529|CAN2_MOUSE	80	0.000136058	0	0	0	0	0.000138687	0.00010169	9.94358e-05	3.40146e-05	8.49531e-05
Serine beta-lactamase-like protein LACTB, mitochondrial OS=Mus musculus OX=10090 GN=Lactb PE=1 SV=1	sp|Q9EP89|LACTB_MOUSE	61	0	0.000211108	0	0	0.000178598	0	0	9.78057e-05	5.27769e-05	6.9101e-05
Plasminogen activator inhibitor 1 RNA-binding protein OS=Mus musculus OX=10090 GN=Serbp1 PE=1 SV=2	sp|Q9CY58|PAIRB_MOUSE	45	0	0	0	0	0	0	0	8.83874e-05	0	2.20969e-05
60S ribosomal protein L36 OS=Mus musculus OX=10090 GN=Rpl36 PE=1 SV=2	sp|P47964|RL36_MOUSE	12	0	0	0	0.000454722	0	0.000369831	0	0.000331453	0.000113681	0.000175321
Ras-related protein R-Ras2 OS=Mus musculus OX=10090 GN=Rras2 PE=1 SV=1	sp|P62071|RRAS2_MOUSE	23	0	0.000223958	0.000209297	0.00035587	0	0	0.000176852	0	0.000197281	4.4213e-05
Bleomycin hydrolase OS=Mus musculus OX=10090 GN=Blmh PE=1 SV=1	sp|Q8R016|BLMH_MOUSE	53	0.000205371	0	0.000227067	0	0.000102778	8.37353e-05	0	0	0.00010811	4.66284e-05
Cytoplasmic aconitate hydratase OS=Mus musculus OX=10090 GN=Aco1 PE=1 SV=3	sp|P28271|ACOC_MOUSE	98	0	0	0.000147362	0	8.33762e-05	0	0	0	3.68405e-05	2.08441e-05
39S ribosomal protein L21, mitochondrial OS=Mus musculus OX=10090 GN=Mrpl21 PE=1 SV=1	sp|Q9D1N9|RM21_MOUSE	23	0	0.000223958	0.000209297	0	0	0.000289433	0.000265278	0.000172932	0.000108314	0.000181911
Glutathione S-transferase kappa 1 OS=Mus musculus OX=10090 GN=Gstk1 PE=1 SV=3	sp|Q9DCM2|GSTK1_MOUSE	26	0	0	0	0.000209872	0	0.000256037	0	0.000458935	5.2468e-05	0.000178743
39S ribosomal protein L13, mitochondrial OS=Mus musculus OX=10090 GN=Mrpl13 PE=1 SV=1	sp|Q9D1P0|RM13_MOUSE	21	0.000518318	0.000490574	0	0	0.000389089	0.000211332	0.000290542	0.000189402	0.000252223	0.000270091
Cytochrome c-type heme lyase OS=Mus musculus OX=10090 GN=Hccs PE=1 SV=2	sp|P53702|CCHL_MOUSE	31	0.000468158	0.000415405	0	0	0	0	0.000131213	0	0.000220891	3.28032e-05
3-hydroxyisobutyryl-CoA hydrolase, mitochondrial OS=Mus musculus OX=10090 GN=Hibch PE=1 SV=1	sp|Q8QZS1|HIBCH_MOUSE	43	0	0	0.000111949	0	0.00019002	0.000154813	0.000141893	0.000138748	2.79873e-05	0.000156368
T-complex protein 1 subunit theta OS=Mus musculus OX=10090 GN=Cct8 PE=1 SV=3	sp|P42932|TCPQ_MOUSE	60	0	0	0	0	0	0	0	6.62906e-05	0	1.65726e-05
28S ribosomal protein S29, mitochondrial OS=Mus musculus OX=10090 GN=Dap3 PE=1 SV=1	sp|Q9ER88|RT29_MOUSE	45	0	0	0	0	0.00012105	0	0.000225977	0.000220969	0	0.000141999
Collagen alpha-6(VI) chain OS=Mus musculus OX=10090 GN=Col6a6 PE=1 SV=2	sp|Q8C6K9|CO6A6_MOUSE	246	0	0	0	0	5.53582e-05	0	0	0	0	1.38396e-05
Mitofusin-1 OS=Mus musculus OX=10090 GN=Mfn1 PE=1 SV=3	sp|Q811U4|MFN1_MOUSE	84	0	0	0	0	0.00016212	5.2833e-05	0.000121059	0.000118376	0	0.000113597
Hydroxymethylglutaryl-CoA lyase, mitochondrial OS=Mus musculus OX=10090 GN=Hmgcl PE=1 SV=2	sp|P38060|HMGCL_MOUSE	34	0	0	0	0.00016049	0	0.000195793	0	0	4.01226e-05	4.89482e-05
40S ribosomal protein S24 OS=Mus musculus OX=10090 GN=Rps24 PE=1 SV=1	sp|P62849|RS24_MOUSE	15	0	0.000515103	0	0	0	0.000295865	0	0.000265162	0.000128776	0.000140257
Microtubule-associated proteins 1A/1B light chain 3A OS=Mus musculus OX=10090 GN=Map1lc3a PE=1 SV=1	sp|Q91VR7|MLP3A_MOUSE	14	0	0	0	0	0	0.000475497	0.000290542	0.000284102	0	0.000262535
60S ribosomal protein L4 OS=Mus musculus OX=10090 GN=Rpl4 PE=1 SV=3	sp|Q9D8E6|RL4_MOUSE	47	0	0	0.000153633	0	0	0	0.000129817	0.000126939	3.84082e-05	6.4189e-05
Triadin OS=Mus musculus OX=10090 GN=Trdn PE=1 SV=1	sp|E9Q9K5|TRDN_MOUSE	78	0	6.60388e-05	0	0	6.98365e-05	0	7.8223e-05	7.64891e-05	1.65097e-05	5.61371e-05
Carbonic anhydrase 2 OS=Mus musculus OX=10090 GN=Ca2 PE=1 SV=4	sp|P00920|CAH2_MOUSE	29	0	0	0.000248991	0.000188161	0	0	0.000210393	0.000274306	0.000109288	0.000121175
Alcohol dehydrogenase class-3 OS=Mus musculus OX=10090 GN=Adh5 PE=1 SV=3	sp|P28474|ADHX_MOUSE	40	0	0	0	0	0	0	0.000152535	0.000198872	0	8.78516e-05
RNA-binding protein FUS OS=Mus musculus OX=10090 GN=Fus PE=1 SV=1	sp|P56959|FUS_MOUSE	53	0	0	0	0	0	0	0.000115121	7.50459e-05	0	4.75416e-05
Ras-interacting protein 1 OS=Mus musculus OX=10090 GN=Rasip1 PE=1 SV=3	sp|Q3U0S6|RAIN_MOUSE	104	0	0	9.25735e-05	0	0	0	0	0	2.31434e-05	0
Catenin alpha-1 OS=Mus musculus OX=10090 GN=Ctnna1 PE=1 SV=1	sp|P26231|CTNA1_MOUSE	100	0	0	0	0	8.17087e-05	6.65696e-05	4.06759e-05	7.95487e-05	0	6.71257e-05
F-box only protein 40 OS=Mus musculus OX=10090 GN=Fbxo40 PE=1 SV=1	sp|P62932|FBX40_MOUSE	80	0	0.000128776	0	0	0.000170226	0	0	9.94358e-05	3.21939e-05	6.74156e-05
Vacuolar protein sorting-associated protein 29 OS=Mus musculus OX=10090 GN=Vps29 PE=1 SV=1	sp|Q9QZ88|VPS29_MOUSE	20	0	0	0	0	0	0.000443797	0.00030507	0.000298308	0	0.000261794
Lamin-B1 OS=Mus musculus OX=10090 GN=Lmnb1 PE=1 SV=3	sp|P14733|LMNB1_MOUSE	67	0	0	0	0	0.000243907	0	0	8.9047e-05	0	8.32384e-05
Heterogeneous nuclear ribonucleoproteins A2/B1 OS=Mus musculus OX=10090 GN=Hnrnpa2b1 PE=1 SV=2	sp|O88569|ROA2_MOUSE	37	0	0	0	0	0	0	0	0.000806237	0	0.000201559
Proteasome subunit alpha type-6 OS=Mus musculus OX=10090 GN=Psma6 PE=1 SV=1	sp|Q9QUM9|PSA6_MOUSE	27	0	0	0	0	0	0	0	0.000147312	0	3.68281e-05
Ubiquitin-conjugating enzyme E2 variant 2 OS=Mus musculus OX=10090 GN=Ube2v2 PE=1 SV=4	sp|Q9D2M8|UB2V2_MOUSE	16	0	0.000321939	0	0	0	0	0.000254225	0.00024859	8.04848e-05	0.000125704
ADP-ribosylation factor-like protein 8B OS=Mus musculus OX=10090 GN=Arl8b PE=1 SV=1	sp|Q9CQW2|ARL8B_MOUSE	22	0.000329839	0.000234138	0	0	0	0.000201726	0.000184891	0.000180792	0.000140994	0.000141852
Dihydropyrimidinase-related protein 2 OS=Mus musculus OX=10090 GN=Dpysl2 PE=1 SV=2	sp|O08553|DPYL2_MOUSE	62	0.000234079	8.30811e-05	7.76423e-05	0	0	0	6.56063e-05	6.41522e-05	9.87006e-05	3.24396e-05
Pentatricopeptide repeat domain-containing protein 3, mitochondrial OS=Mus musculus OX=10090 GN=Ptcd3 PE=1 SV=2	sp|Q14C51|PTCD3_MOUSE	78	0	0	0	0	0.000104755	0	0	5.09927e-05	0	3.89369e-05
NADH dehydrogenase [ubiquinone] 1 beta subcomplex subunit 8, mitochondrial OS=Mus musculus OX=10090 GN=Ndufb8 PE=1 SV=1	sp|Q9D6J5|NDUB8_MOUSE	22	0	0	0	0	0	0.000403452	0.000369781	0	0	0.000193308
3-ketoacyl-CoA thiolase A, peroxisomal OS=Mus musculus OX=10090 GN=Acaa1a PE=1 SV=1	sp|Q921H8|THIKA_MOUSE	44	0	0	0	0	0.000185702	0	0	0.000135594	0	8.0324e-05
Ig kappa chain V-II region 17S29.1 OS=Mus musculus OX=10090 PE=1 SV=1	sp|P03976|KV2A5_MOUSE	12	0	0.000429252	0	0	0	0	0	0	0.000107313	0
Cysteine and glycine-rich protein 1 OS=Mus musculus OX=10090 GN=Csrp1 PE=1 SV=3	sp|P97315|CSRP1_MOUSE	21	0	0	0	0	0	0.000211332	0	0.000284102	0	0.000123859
Low molecular weight phosphotyrosine protein phosphatase OS=Mus musculus OX=10090 GN=Acp1 PE=1 SV=3	sp|Q9D358|PPAC_MOUSE	18	0	0.000286168	0	0	0	0.000246554	0.000225977	0	7.15421e-05	0.000118133
28S ribosomal protein S34, mitochondrial OS=Mus musculus OX=10090 GN=Mrps34 PE=1 SV=1	sp|Q9JIK9|RT34_MOUSE	26	0	0.000198116	0	0	0	0.000170691	0.000312892	0	4.95291e-05	0.000120896
MICOS complex subunit Mic26 OS=Mus musculus OX=10090 GN=Apoo PE=1 SV=2	sp|Q9DCZ4|MIC26_MOUSE	23	0	0	0	0	0.000236837	0.000289433	0.000176852	0.000172932	0	0.000219013
Four and a half LIM domains protein 2 OS=Mus musculus OX=10090 GN=Fhl2 PE=1 SV=1	sp|O70433|FHL2_MOUSE	32	0	0	0.000225648	0	0	0	0	0	5.6412e-05	0
LIM and SH3 domain protein 1 OS=Mus musculus OX=10090 GN=Lasp1 PE=1 SV=1	sp|Q61792|LASP1_MOUSE	30	0	0	0	0	0	0	0.00020338	0.000198872	0	0.000100563
ATP-dependent RNA helicase A OS=Mus musculus OX=10090 GN=Dhx9 PE=1 SV=2	sp|O70133|DHX9_MOUSE	149	0	0	0	0	0	0	0	2.66942e-05	0	6.67355e-06
Complement C1q subcomponent subunit C OS=Mus musculus OX=10090 GN=C1qc PE=1 SV=2	sp|Q02105|C1QC_MOUSE	26	0	0.000297175	0	0	0	0	0	0.000305956	7.42937e-05	7.64891e-05
60S ribosomal protein L27a OS=Mus musculus OX=10090 GN=Rpl27a PE=1 SV=5	sp|P14115|RL27A_MOUSE	17	0	0	0	0	0	0.000261057	0.00023927	0.000233967	0	0.000183573
Eukaryotic translation initiation factor 5A-1 OS=Mus musculus OX=10090 GN=Eif5a PE=1 SV=2	sp|P63242|IF5A1_MOUSE	17	0	0	0	0	0	0.000391586	0	0.0007019	0	0.000273371
Peptidyl-prolyl cis-trans isomerase A OS=Mus musculus OX=10090 GN=Ppia PE=1 SV=2	sp|P17742|PPIA_MOUSE	18	0	0	0	0	0	0	0	0.000441937	0	0.000110484
Aspartyl/asparaginyl beta-hydroxylase OS=Mus musculus OX=10090 GN=Asph PE=1 SV=1	sp|Q8BSY0|ASPH_MOUSE	83	0	0	0	0	0	0	0	7.18813e-05	0	1.79703e-05
40S ribosomal protein S30 OS=Mus musculus OX=10090 GN=Fau PE=1 SV=1	sp|P62862|RS30_MOUSE	7	0	0	0	0	0	0.000633996	0	0	0	0.000158499
Splicing factor, proline- and glutamine-rich OS=Mus musculus OX=10090 GN=Sfpq PE=1 SV=1	sp|Q8VIJ6|SFPQ_MOUSE	75	0	0	6.41843e-05	0	0	0	5.42346e-05	0	1.60461e-05	1.35586e-05
40S ribosomal protein S28 OS=Mus musculus OX=10090 GN=Rps28 PE=1 SV=1	sp|P62858|RS28_MOUSE	8	0	0	0	0.000682083	0	0	0.000762674	0.000745769	0.000170521	0.000377111
40S ribosomal protein S27 OS=Mus musculus OX=10090 GN=Rps27 PE=1 SV=3	sp|Q6ZWU9|RS27_MOUSE	9	0	0	0	0.000606296	0	0.000493108	0.000677932	0.000441937	0.000151574	0.000403244
10 kDa heat shock protein, mitochondrial OS=Mus musculus OX=10090 GN=Hspe1 PE=1 SV=2	sp|Q64433|CH10_MOUSE	11	0	0.000468275	0	0	0.000495204	0.000403452	0.000554672	0.000542377	0.000117069	0.000498926
DNA damage-binding protein 1 OS=Mus musculus OX=10090 GN=Ddb1 PE=1 SV=2	sp|Q3U1J4|DDB1_MOUSE	127	0	0	0	0	0	0	4.80424e-05	3.13184e-05	0	1.98402e-05
Protein FAM162A OS=Mus musculus OX=10090 GN=Fam162a PE=1 SV=1	sp|Q9D6U8|F162A_MOUSE	18	0	0	0	0	0	0.000246554	0.000225977	0.000441937	0	0.000228617
Aspartate--tRNA ligase, cytoplasmic OS=Mus musculus OX=10090 GN=Dars1 PE=1 SV=2	sp|Q922B2|SYDC_MOUSE	57	0	0	8.4453e-05	0	0	0	0.000107042	0.000139559	2.11133e-05	6.16503e-05
Cytochrome c oxidase assembly protein COX20, mitochondrial OS=Mus musculus OX=10090 GN=Cox20 PE=1 SV=1	sp|Q9D7J4|COX20_MOUSE	13	0	0.000396233	0	0	0	0	0.000625784	0.000458935	9.90582e-05	0.00027118
Peroxisomal acyl-coenzyme A oxidase 1 OS=Mus musculus OX=10090 GN=Acox1 PE=1 SV=5	sp|Q9R0H0|ACOX1_MOUSE	75	0	0	0	0	7.263e-05	5.91729e-05	8.13519e-05	5.30325e-05	0	6.65468e-05
Band 3 anion transport protein OS=Mus musculus OX=10090 GN=Slc4a1 PE=1 SV=1	sp|P04919|B3AT_MOUSE	103	0	0	0	0	0	0	3.94912e-05	3.86159e-05	0	1.95268e-05
Oxidoreductase NAD-binding domain-containing protein 1 OS=Mus musculus OX=10090 GN=Oxnad1 PE=1 SV=2	sp|Q8VE38|OXND1_MOUSE	35	0	0	0.000137538	0	0	0	0	0.000170461	3.43844e-05	4.26154e-05
Ras-related protein Rab-35 OS=Mus musculus OX=10090 GN=Rab35 PE=1 SV=1	sp|Q6PHN9|RAB35_MOUSE	23	0	0	0	0	0	0	0	0.000172932	0	4.3233e-05
Nicotinamide phosphoribosyltransferase OS=Mus musculus OX=10090 GN=Nampt PE=1 SV=1	sp|Q99KQ4|NAMPT_MOUSE	55	0	0	0	0	9.90409e-05	0.000121036	0	7.2317e-05	0	7.30983e-05
Ubiquitin-conjugating enzyme E2 N OS=Mus musculus OX=10090 GN=Ube2n PE=1 SV=1	sp|P61089|UBE2N_MOUSE	17	0	0.000303002	0	0.00032098	0	0	0	0	0.000155996	0
Bcl-2-like protein 13 OS=Mus musculus OX=10090 GN=Bcl2l13 PE=1 SV=2	sp|P59017|B2L13_MOUSE	47	0	0.000109596	0	0	0.000115899	0	0.000173089	0	2.73991e-05	7.2247e-05
Sodium/calcium exchanger 1 OS=Mus musculus OX=10090 GN=Slc8a1 PE=1 SV=1	sp|P70414|NAC1_MOUSE	108	0	0	4.45724e-05	0	0	0	3.76629e-05	0	1.11431e-05	9.41573e-06
39S ribosomal protein L9, mitochondrial OS=Mus musculus OX=10090 GN=Mrpl9 PE=1 SV=2	sp|Q99N94|RM09_MOUSE	30	0.000241882	0	0	0	0.000181575	0	0	0	6.04704e-05	4.53937e-05
Methylglutaconyl-CoA hydratase, mitochondrial OS=Mus musculus OX=10090 GN=Auh PE=1 SV=1	sp|Q9JLZ3|AUHM_MOUSE	33	0	0	0	0	0	0.000134484	0.00012326	0	0	6.44361e-05
Laminin subunit alpha-5 OS=Mus musculus OX=10090 GN=Lama5 PE=1 SV=4	sp|Q61001|LAMA5_MOUSE	404	0	0	0	0	2.02249e-05	0	0	0	0	5.05623e-06
Adenylosuccinate lyase OS=Mus musculus OX=10090 GN=Adsl PE=1 SV=2	sp|P54822|PUR8_MOUSE	55	0	0	0	0	9.90409e-05	0	7.39562e-05	0	0	4.32493e-05
Tropomodulin-3 OS=Mus musculus OX=10090 GN=Tmod3 PE=1 SV=1	sp|Q9JHJ0|TMOD3_MOUSE	40	0	0.000193164	0	0	0.000340453	0	0	9.94358e-05	4.82909e-05	0.000109972
39S ribosomal protein L33, mitochondrial OS=Mus musculus OX=10090 GN=Mrpl33 PE=1 SV=1	sp|Q9CQP0|RM33_MOUSE	7	0	0	0	0.00116929	0	0	0	0	0.000292321	0
T-complex protein 1 subunit zeta OS=Mus musculus OX=10090 GN=Cct6a PE=1 SV=3	sp|P80317|TCPZ_MOUSE	58	0	0	0	0	0	0	0	0.000171441	0	4.28603e-05
Amine oxidase [flavin-containing] B OS=Mus musculus OX=10090 GN=Maob PE=1 SV=4	sp|Q8BW75|AOFB_MOUSE	59	0	0	0	0	0	0	0.000103413	0.000101121	0	5.11336e-05
39S ribosomal protein L43, mitochondrial OS=Mus musculus OX=10090 GN=Mrpl43 PE=1 SV=1	sp|Q99N89|RM43_MOUSE	20	0	0.000386327	0	0	0	0	0	0	9.65818e-05	0
Isoaspartyl peptidase/L-asparaginase OS=Mus musculus OX=10090 GN=Asrgl1 PE=1 SV=1	sp|Q8C0M9|ASGL1_MOUSE	34	0	0	0.000212374	0	0	0	0	0.000116983	5.30936e-05	2.92458e-05
Multifunctional protein ADE2 OS=Mus musculus OX=10090 GN=Paics PE=1 SV=4	sp|Q9DCL9|PUR6_MOUSE	47	0	0	0	0.000174149	0	0	0	0.000211566	4.35372e-05	5.28914e-05
Heterogeneous nuclear ribonucleoprotein A3 OS=Mus musculus OX=10090 GN=Hnrnpa3 PE=1 SV=1	sp|Q8BG05|ROA3_MOUSE	40	0	0	0	0	0	0	0	0.000198872	0	4.97179e-05
Plastin-2 OS=Mus musculus OX=10090 GN=Lcp1 PE=1 SV=4	sp|Q61233|PLSL_MOUSE	70	0	0	0	0	0	0	0	0.000312513	0	7.81282e-05
Serine protease HTRA2, mitochondrial OS=Mus musculus OX=10090 GN=Htra2 PE=1 SV=2	sp|Q9JIY5|HTRA2_MOUSE	49	0	0	9.82413e-05	0	0	0	0	8.11721e-05	2.45603e-05	2.0293e-05
Immunoglobulin J chain OS=Mus musculus OX=10090 GN=Jchain PE=1 SV=4	sp|P01592|IGJ_MOUSE	18	0	0	0.000267435	0.000303148	0	0	0	0.000331453	0.000142646	8.28632e-05
Dual specificity protein phosphatase 3 OS=Mus musculus OX=10090 GN=Dusp3 PE=1 SV=1	sp|Q9D7X3|DUS3_MOUSE	20	0	0	0	0	0	0	0	0.000198872	0	4.97179e-05
Inorganic pyrophosphatase 2, mitochondrial OS=Mus musculus OX=10090 GN=Ppa2 PE=1 SV=1	sp|Q91VM9|IPYR2_MOUSE	38	0	0	0	0	0	0	0.000160563	0.000104669	0	6.63081e-05
Fragile X mental retardation syndrome-related protein 1 OS=Mus musculus OX=10090 GN=Fxr1 PE=1 SV=2	sp|Q61584|FXR1_MOUSE	76	0	0	0	0	7.16743e-05	0	0	0	0	1.79186e-05
Superoxide dismutase [Cu-Zn] OS=Mus musculus OX=10090 GN=Sod1 PE=1 SV=2	sp|P08228|SODC_MOUSE	16	0	0.000321939	0	0	0	0	0	0	8.04848e-05	0
Methyl-CpG-binding protein 2 OS=Mus musculus OX=10090 GN=Mecp2 PE=1 SV=1	sp|Q9Z2D6|MECP2_MOUSE	52	0	0	0	0.000104936	0	0	0	0.000114734	2.6234e-05	2.86834e-05
Transmembrane protein 143 OS=Mus musculus OX=10090 GN=Tmem143 PE=1 SV=1	sp|Q8VD26|TM143_MOUSE	52	0	0	0	0	0	0	7.8223e-05	0	0	1.95557e-05
28S ribosomal protein S35, mitochondrial OS=Mus musculus OX=10090 GN=Mrps35 PE=1 SV=2	sp|Q8BJZ4|RT35_MOUSE	36	0	0	0	0	0	0	0.000112989	0	0	2.82472e-05
NADH dehydrogenase [ubiquinone] 1 alpha subcomplex assembly factor 4 OS=Mus musculus OX=10090 GN=Ndufaf4 PE=1 SV=1	sp|Q9D1H6|NDUF4_MOUSE	20	0	0	0	0	0.000544725	0	0.00020338	0	0	0.000187026
Protein flightless-1 homolog OS=Mus musculus OX=10090 GN=Flii PE=1 SV=1	sp|Q9JJ28|FLII_MOUSE	145	0	0	0	0	0	0	0	4.11459e-05	0	1.02865e-05
von Willebrand factor OS=Mus musculus OX=10090 GN=Vwf PE=1 SV=2	sp|Q8CIZ8|VWF_MOUSE	309	0	3.334e-05	0	0	3.52573e-05	0	0	1.93079e-05	8.335e-06	1.36413e-05
Actin-related protein 2/3 complex subunit 3 OS=Mus musculus OX=10090 GN=Arpc3 PE=1 SV=3	sp|Q9JM76|ARPC3_MOUSE	21	0	0	0	0	0	0	0	0.000189402	0	4.73504e-05
Calmodulin-1 OS=Mus musculus OX=10090 GN=Calm1 PE=1 SV=1	sp|P0DP26|CALM1_MOUSE (+2)	17	0.00042685	0	0	0	0	0	0	0.000584917	0.000106713	0.000146229
Complement C1q subcomponent subunit A OS=Mus musculus OX=10090 GN=C1qa PE=1 SV=2	sp|P98086|C1QA_MOUSE	26	0	0.000297175	0	0	0	0	0	0	7.42937e-05	0
40S ribosomal protein S12 OS=Mus musculus OX=10090 GN=Rps12 PE=1 SV=2	sp|P63323|RS12_MOUSE	15	0	0	0	0	0	0	0.000271173	0	0	6.77932e-05
60S ribosomal protein L38 OS=Mus musculus OX=10090 GN=Rpl38 PE=1 SV=3	sp|Q9JJI8|RL38_MOUSE	8	0	0	0.000601728	0	0	0	0.000508449	0	0.000150432	0.000127112
Signal recognition particle 9 kDa protein OS=Mus musculus OX=10090 GN=Srp9 PE=1 SV=2	sp|P49962|SRP09_MOUSE	10	0	0	0	0	0.000544725	0	0	0	0	0.000136181
Guanine nucleotide-binding protein G(I)/G(S)/G(O) subunit gamma-12 OS=Mus musculus OX=10090 GN=Gng12 PE=1 SV=3	sp|Q9DAS9|GBG12_MOUSE	8	0	0	0	0	0	0.000554746	0.000508449	0	0	0.000265799
39S ribosomal protein L2, mitochondrial OS=Mus musculus OX=10090 GN=Mrpl2 PE=1 SV=1	sp|Q9D773|RM02_MOUSE	33	0	0	0	0.000165354	0	0	0	0	4.13384e-05	0
MICOS complex subunit Mic27 OS=Mus musculus OX=10090 GN=Apool PE=1 SV=1	sp|Q78IK4|MIC27_MOUSE	29	0	0	0	0	0	0	0	0.000205729	0	5.14323e-05
Acyl-coenzyme A thioesterase 9, mitochondrial OS=Mus musculus OX=10090 GN=Acot9 PE=1 SV=1	sp|Q9R0X4|ACOT9_MOUSE	51	0	0	0	0	0	0	7.97567e-05	7.79889e-05	0	3.94364e-05
NLR family member X1 OS=Mus musculus OX=10090 GN=Nlrx1 PE=1 SV=1	sp|Q3TL44|NLRX1_MOUSE	108	0	0	4.45724e-05	0	5.04375e-05	0	0	0	1.11431e-05	1.26094e-05
C-1-tetrahydrofolate synthase, cytoplasmic OS=Mus musculus OX=10090 GN=Mthfd1 PE=1 SV=4	sp|Q922D8|C1TC_MOUSE	101	0	0	4.76616e-05	0	8.08997e-05	0	0	0	1.19154e-05	2.02249e-05
Nuclear mitotic apparatus protein 1 OS=Mus musculus OX=10090 GN=Numa1 PE=1 SV=1	sp|E9Q7G0|NUMA1_MOUSE	236	0	0	0	0	2.30816e-05	0	0	0	0	5.77039e-06
Serine/arginine-rich splicing factor 1 OS=Mus musculus OX=10090 GN=Srsf1 PE=1 SV=3	sp|Q6PDM2|SRSF1_MOUSE	28	0	0	0	0	0	0	0	0.000355128	0	8.8782e-05
39S ribosomal protein L46, mitochondrial OS=Mus musculus OX=10090 GN=Mrpl46 PE=1 SV=1	sp|Q9EQI8|RM46_MOUSE	32	0	0	0	0.000170521	0	0	0	0	4.26302e-05	0
Cysteine and histidine-rich domain-containing protein 1 OS=Mus musculus OX=10090 GN=Chordc1 PE=1 SV=1	sp|Q9D1P4|CHRD1_MOUSE	37	0	0	0	0	0	0	0.000164902	0.000107498	0	6.81002e-05
Probable leucine--tRNA ligase, mitochondrial OS=Mus musculus OX=10090 GN=Lars2 PE=1 SV=1	sp|Q8VDC0|SYLM_MOUSE	101	0	0	0	0	0	0	0	5.90708e-05	0	1.47677e-05
SWI/SNF complex subunit SMARCC2 OS=Mus musculus OX=10090 GN=Smarcc2 PE=1 SV=2	sp|Q6PDG5|SMRC2_MOUSE	133	0	0	0	0	0	3.33682e-05	3.05834e-05	2.99055e-05	0	2.34643e-05
39S ribosomal protein L16, mitochondrial OS=Mus musculus OX=10090 GN=Mrpl16 PE=1 SV=1	sp|Q99N93|RM16_MOUSE	29	0	0.000266432	0	0	0	0	0	0	6.66081e-05	0
39S ribosomal protein L27, mitochondrial OS=Mus musculus OX=10090 GN=Mrpl27 PE=1 SV=1	sp|Q99N92|RM27_MOUSE	16	0	0.000482909	0	0	0	0	0	0	0.000120727	0
40S ribosomal protein S6 OS=Mus musculus OX=10090 GN=Rps6 PE=1 SV=1	sp|P62754|RS6_MOUSE	29	0	0	0	0	0.000281754	0	0	0	0	7.04385e-05
Arf-GAP with SH3 domain, ANK repeat and PH domain-containing protein 1 OS=Mus musculus OX=10090 GN=Asap1 PE=1 SV=2	sp|Q9QWY8|ASAP1_MOUSE	127	0	0	0	0	0	6.98893e-05	0	4.69776e-05	0	2.92167e-05
Rho GTPase-activating protein 24 OS=Mus musculus OX=10090 GN=Arhgap24 PE=1 SV=2	sp|Q8C4V1|RHG24_MOUSE	84	0.000215966	0	0	0	0	0	0	0	5.39914e-05	0
Phosphoglucomutase-like protein 5 OS=Mus musculus OX=10090 GN=Pgm5 PE=1 SV=2	sp|Q8BZF8|PGM5_MOUSE	62	0	0	0	0	0.000175718	0	0	0	0	4.39294e-05
Chloride intracellular channel protein 1 OS=Mus musculus OX=10090 GN=Clic1 PE=1 SV=3	sp|Q9Z1Q5|CLIC1_MOUSE	27	0	0	0	0	0	0	0	0.000147312	0	3.68281e-05
Beta-parvin OS=Mus musculus OX=10090 GN=Parvb PE=1 SV=1	sp|Q9ES46|PARVB_MOUSE	42	0	0	0	0	0	0	9.68475e-05	0.000142051	0	5.97247e-05
RNA-splicing ligase RtcB homolog OS=Mus musculus OX=10090 GN=Rtcb PE=1 SV=1	sp|Q99LF4|RTCB_MOUSE	55	0	0	8.7524e-05	0	0	8.06904e-05	0	0	2.1881e-05	2.01726e-05
Protein disulfide-isomerase A3 OS=Mus musculus OX=10090 GN=Pdia3 PE=1 SV=2	sp|P27773|PDIA3_MOUSE	57	0	0	0	0	0	0	0	0.000139559	0	3.48898e-05
CAP-Gly domain-containing linker protein 1 OS=Mus musculus OX=10090 GN=Clip1 PE=1 SV=1	sp|Q922J3|CLIP1_MOUSE	156	0	0	0	0	0	4.26728e-05	2.60743e-05	2.54964e-05	0	2.35609e-05
Transcription elongation factor, mitochondrial OS=Mus musculus OX=10090 GN=Tefm PE=1 SV=1	sp|Q5SSK3|TEFM_MOUSE	42	0.000172773	0	0	0	0	0.000105666	0	0	4.31932e-05	2.64165e-05
Rho GDP-dissociation inhibitor 1 OS=Mus musculus OX=10090 GN=Arhgdia PE=1 SV=3	sp|Q99PT1|GDIR1_MOUSE	23	0	0	0	0	0	0	0	0.000172932	0	4.3233e-05
Heat shock protein beta-7 OS=Mus musculus OX=10090 GN=Hspb7 PE=1 SV=3	sp|P35385|HSPB7_MOUSE	19	0	0	0	0	0	0.000350366	0	0	0	8.75915e-05
Peptidyl-prolyl cis-trans isomerase F, mitochondrial OS=Mus musculus OX=10090 GN=Ppif PE=1 SV=1	sp|Q99KR7|PPIF_MOUSE	22	0	0	0	0	0	0	0.000184891	0	0	4.62227e-05
Mitochondrial amidoxime reducing component 2 OS=Mus musculus OX=10090 GN=Mtarc2 PE=1 SV=1	sp|Q922Q1|MARC2_MOUSE	38	0	0	0	0	0	0	0.000214084	0	0	5.3521e-05
Complex I intermediate-associated protein 30, mitochondrial OS=Mus musculus OX=10090 GN=Ndufaf1 PE=1 SV=2	sp|Q9CWX2|CIA30_MOUSE	38	0	0	0	0	0	0	0.000214084	0	0	5.3521e-05
Protein transport protein Sec23A OS=Mus musculus OX=10090 GN=Sec23a PE=1 SV=2	sp|Q01405|SC23A_MOUSE	86	0	0	0	0	0	0	7.09464e-05	0	0	1.77366e-05
Proteasome subunit beta type-5 OS=Mus musculus OX=10090 GN=Psmb5 PE=1 SV=3	sp|O55234|PSB5_MOUSE	29	0	0.000177622	0	0	0	0.000153033	0.000140262	0	4.44054e-05	7.33238e-05
Ras-related protein Rap-1b OS=Mus musculus OX=10090 GN=Rap1b PE=1 SV=2	sp|Q99JI6|RAP1B_MOUSE	21	0	0	0	0	0	0	0.000193695	0.000189402	0	9.57741e-05
Proteasome subunit alpha type-3 OS=Mus musculus OX=10090 GN=Psma3 PE=1 SV=3	sp|O70435|PSA3_MOUSE	28	0	0	0	0	0.000291817	0	0	0	0	7.29542e-05
A-kinase anchor protein 1, mitochondrial OS=Mus musculus OX=10090 GN=Akap1 PE=1 SV=4	sp|O08715|AKAP1_MOUSE	92	0	0	0	0	5.92092e-05	0	0	4.3233e-05	0	2.56105e-05
T-complex protein 1 subunit epsilon OS=Mus musculus OX=10090 GN=Cct5 PE=1 SV=1	sp|P80316|TCPE_MOUSE	60	0	0	0	0	0	0	0.00010169	6.62906e-05	0	4.19951e-05
Sorbin and SH3 domain-containing protein 1 OS=Mus musculus OX=10090 GN=Sorbs1 PE=1 SV=2	sp|Q62417|SRBS1_MOUSE	143	0	0	0	3.81585e-05	0	0	0	0	9.53963e-06	0
Nucleophosmin OS=Mus musculus OX=10090 GN=Npm1 PE=1 SV=1	sp|Q61937|NPM_MOUSE	33	0	0	0	0	0	0	0	0.000241057	0	6.02641e-05
Leucine-rich repeat-containing protein 15 OS=Mus musculus OX=10090 GN=Lrrc15 PE=2 SV=1	sp|Q80X72|LRC15_MOUSE	64	0	0	0	0.000213151	0	0	0	0	5.32878e-05	0
Xin actin-binding repeat-containing protein 1 OS=Mus musculus OX=10090 GN=Xirp1 PE=1 SV=2	sp|O70373|XIRP1_MOUSE	123	0	8.37566e-05	0	0	0	0	0	0	2.09391e-05	0
Desmoglein-4 OS=Mus musculus OX=10090 GN=Dsg4 PE=1 SV=1	sp|Q7TMD7|DSG4_MOUSE	114	0.000127306	0	0	7.17982e-05	0	0	0	0	4.97761e-05	0
Glucose-6-phosphate isomerase OS=Mus musculus OX=10090 GN=Gpi PE=1 SV=4	sp|P06745|G6PI_MOUSE	63	0.000172773	0	0	0	0	0	0	0.000157835	4.31932e-05	3.94587e-05
Serpin B5 OS=Mus musculus OX=10090 GN=Serpinb5 PE=1 SV=1	sp|P70124|SPB5_MOUSE	42	0.000604704	0	0	0	0	0	0	0	0.000151176	0
Methylmalonyl-CoA mutase, mitochondrial OS=Mus musculus OX=10090 GN=Mmut PE=1 SV=2	sp|P16332|MUTA_MOUSE	83	0	0	0	0	6.56295e-05	0	0	0	0	1.64074e-05
ATPase inhibitor, mitochondrial OS=Mus musculus OX=10090 GN=Atp5if1 PE=1 SV=2	sp|O35143|ATIF1_MOUSE	12	0	0	0.000401152	0	0	0	0.000338966	0	0.000100288	8.47415e-05
Ubiquitin carboxyl-terminal hydrolase 5 OS=Mus musculus OX=10090 GN=Usp5 PE=1 SV=1	sp|P56399|UBP5_MOUSE	96	0	0	0	5.68403e-05	0	0	0	0	1.42101e-05	0
Centrosomal protein of 112 kDa OS=Mus musculus OX=10090 GN=Cep112 PE=2 SV=2	sp|Q5PR68|CE112_MOUSE	113	6.42164e-05	0	0	0	0	0	0	0	1.60541e-05	0
Actin-related protein 3 OS=Mus musculus OX=10090 GN=Actr3 PE=1 SV=3	sp|Q99JY9|ARP3_MOUSE	47	0.000154393	0	0	0.000116099	0	0	0	0	6.7623e-05	0
28S ribosomal protein S28, mitochondrial OS=Mus musculus OX=10090 GN=Mrps28 PE=1 SV=1	sp|Q9CY16|RT28_MOUSE	21	0	0.000367931	0	0	0	0	0	0	9.19826e-05	0
Chromodomain-helicase-DNA-binding protein 6 OS=Mus musculus OX=10090 GN=Chd6 PE=1 SV=1	sp|A3KFM7|CHD6_MOUSE	305	0	0	0	0	0	0	1.33364e-05	0	0	3.33409e-06
LIM zinc-binding domain-containing Nebulette OS=Mus musculus OX=10090 GN=Nebl PE=1 SV=1	sp|Q9DC07|LNEBL_MOUSE	31	0	0	0	0	0	0	0	0.000128304	0	3.20761e-05
Protein SEC13 homolog OS=Mus musculus OX=10090 GN=Sec13 PE=1 SV=3	sp|Q9D1M0|SEC13_MOUSE	36	0	0	0	0	0	0	0	0.000110484	0	2.76211e-05
Arginine--tRNA ligase, cytoplasmic OS=Mus musculus OX=10090 GN=Rars1 PE=1 SV=2	sp|Q9D0I9|SYRC_MOUSE	76	0	0	0	0	0	0	5.3521e-05	0	0	1.33802e-05
Cytosol aminopeptidase OS=Mus musculus OX=10090 GN=Lap3 PE=1 SV=3	sp|Q9CPY7|AMPL_MOUSE	56	0	0	0	0	0	0	7.26356e-05	0	0	1.81589e-05
Long-chain fatty acid transport protein 1 OS=Mus musculus OX=10090 GN=Slc27a1 PE=1 SV=1	sp|Q60714|S27A1_MOUSE	71	0	7.25497e-05	0	0	0	0	0	0	1.81374e-05	0
Eukaryotic translation initiation factor 2 subunit 2 OS=Mus musculus OX=10090 GN=Eif2s2 PE=1 SV=1	sp|Q99L45|IF2B_MOUSE	38	0	0	0	0	0	0.000116789	0	0	0	2.91972e-05
Delta-sarcoglycan OS=Mus musculus OX=10090 GN=Sgcd PE=1 SV=1	sp|P82347|SGCD_MOUSE	32	0	0	0	0	0	0.000138687	0	0	0	3.46716e-05
Band 4.1-like protein 2 OS=Mus musculus OX=10090 GN=Epb41l2 PE=1 SV=2	sp|O70318|E41L2_MOUSE	110	0	7.02413e-05	0	0	0	0	0	0	1.75603e-05	0
Growth factor receptor-bound protein 2 OS=Mus musculus OX=10090 GN=Grb2 PE=1 SV=1	sp|Q60631|GRB2_MOUSE	25	0	0	0	0	0	0	0	0.000159097	0	3.97743e-05
T-complex protein 1 subunit delta OS=Mus musculus OX=10090 GN=Cct4 PE=1 SV=3	sp|P80315|TCPD_MOUSE	58	0	0	0	0	0	0	0	0.000102865	0	2.57162e-05
Protein POF1B OS=Mus musculus OX=10090 GN=Pof1b PE=2 SV=3	sp|Q8K4L4|POF1B_MOUSE	68	0.000160069	0	0	0	0	0	0	0	4.00172e-05	0
Gephyrin OS=Mus musculus OX=10090 GN=Gphn PE=1 SV=2	sp|Q8BUV3|GEPH_MOUSE	83	0	0	0	0	0	0	4.90072e-05	0	0	1.22518e-05
NADH dehydrogenase [ubiquinone] 1 alpha subcomplex assembly factor 3 OS=Mus musculus OX=10090 GN=Ndufaf3 PE=1 SV=1	sp|Q9JKL4|NDUF3_MOUSE	21	0	0	0	0	0	0	0	0.000284102	0	7.10256e-05
Galectin-3 OS=Mus musculus OX=10090 GN=Lgals3 PE=1 SV=3	sp|P16110|LEG3_MOUSE	28	0.000259159	0	0	0	0	0	0	0	6.47897e-05	0
Matrix metalloproteinase-9 OS=Mus musculus OX=10090 GN=Mmp9 PE=1 SV=2	sp|P41245|MMP9_MOUSE	81	0	0.000127186	0	0	0	0	0	0	3.17965e-05	0
High mobility group protein B1 OS=Mus musculus OX=10090 GN=Hmgb1 PE=1 SV=2	sp|P63158|HMGB1_MOUSE	25	0	0	0	0	0	0	0	0.000477292	0	0.000119323
Heterogeneous nuclear ribonucleoproteins C1/C2 OS=Mus musculus OX=10090 GN=Hnrnpc PE=1 SV=1	sp|Q9Z204|HNRPC_MOUSE	34	0	0	0	0	0	0	0	0.000233967	0	5.84917e-05
Heat shock 70 kDa protein 12B OS=Mus musculus OX=10090 GN=Hspa12b PE=1 SV=1	sp|Q9CZJ2|HS12B_MOUSE	76	0	0	9.50096e-05	0	0	0	0	0	2.37524e-05	0
T-complex protein 1 subunit eta OS=Mus musculus OX=10090 GN=Cct7 PE=1 SV=1	sp|P80313|TCPH_MOUSE	60	0	0	0	0	0	0	0	9.94358e-05	0	2.4859e-05
Histidine-rich glycoprotein OS=Mus musculus OX=10090 GN=Hrg PE=1 SV=2	sp|Q9ESB3|HRG_MOUSE	59	0	0	0	0	0	7.52198e-05	0	6.74141e-05	0	3.56585e-05
Thymosin beta-4 OS=Mus musculus OX=10090 GN=Tmsb4x PE=1 SV=1	sp|P20065|TYB4_MOUSE	6	0	0	0	0	0	0	0	0.00198872	0	0.000497179
Complement C1q subcomponent subunit B OS=Mus musculus OX=10090 GN=C1qb PE=1 SV=2	sp|P14106|C1QB_MOUSE	27	0	0.000190779	0	0	0	0	0	0	4.76947e-05	0
Heterogeneous nuclear ribonucleoprotein L OS=Mus musculus OX=10090 GN=Hnrnpl PE=1 SV=2	sp|Q8R081|HNRPL_MOUSE	64	0	0	0	0	0	0	0	6.21474e-05	0	1.55369e-05
Peptidyl-tRNA hydrolase ICT1, mitochondrial OS=Mus musculus OX=10090 GN=Mrpl58 PE=1 SV=1	sp|Q8R035|ICT1_MOUSE	23	0	0	0	0.000237246	0	0	0	0	5.93116e-05	0
AP-2 complex subunit mu OS=Mus musculus OX=10090 GN=Ap2m1 PE=1 SV=1	sp|P84091|AP2M1_MOUSE	50	0	0.000103021	0	0	0	0	0	0	2.57551e-05	0
Filamin-A-interacting protein 1 OS=Mus musculus OX=10090 GN=Filip1 PE=1 SV=2	sp|Q9CS72|FLIP1_MOUSE	138	5.2583e-05	0	0	0	0	0	0	0	1.31457e-05	0
LIM and cysteine-rich domains protein 1 OS=Mus musculus OX=10090 GN=Lmcd1 PE=1 SV=1	sp|Q8VEE1|LMCD1_MOUSE	41	0	0	0	0	0	0	0	9.70106e-05	0	2.42526e-05
Mitochondrial import inner membrane translocase subunit TIM16 OS=Mus musculus OX=10090 GN=Pam16 PE=1 SV=1	sp|Q9CQV1|TIM16_MOUSE	14	0	0	0	0	0	0.000316998	0.000290542	0	0	0.000151885
60S acidic ribosomal protein P2 OS=Mus musculus OX=10090 GN=Rplp2 PE=1 SV=3	sp|P99027|RLA2_MOUSE	12	0	0	0	0	0	0	0	0.000662906	0	0.000165726
AP-2 complex subunit beta OS=Mus musculus OX=10090 GN=Ap2b1 PE=1 SV=1	sp|Q9DBG3|AP2B1_MOUSE	105	0	4.90574e-05	0	0	0	0	0	0	1.22644e-05	0
Myelin basic protein OS=Mus musculus OX=10090 GN=Mbp PE=1 SV=2	sp|P04370|MBP_MOUSE	27	0	0	0	0	0	0	0	0.000220969	0	5.52421e-05
Calreticulin OS=Mus musculus OX=10090 GN=Calr PE=1 SV=1	sp|P14211|CALR_MOUSE	48	0	0	0	0	0	0	0	0.000207158	0	5.17895e-05
V-set and immunoglobulin domain-containing protein 8 OS=Mus musculus OX=10090 GN=Vsig8 PE=2 SV=2	sp|Q6P3A4|VSIG8_MOUSE	44	0	0	0	0.000310038	0	0	0	0	7.75095e-05	0
Keratin-associated protein 9-3 OS=Mus musculus OX=10090 GN=Krtap9-3 PE=2 SV=1	sp|Q3V2C1|KRA93_MOUSE	14	0	0	0	0.000779524	0	0	0	0	0.000194881	0
Fibrinogen alpha chain OS=Mus musculus OX=10090 GN=Fga PE=1 SV=1	sp|E9PV24|FIBA_MOUSE	87	0	5.92072e-05	0	0	0	0	0	0	1.48018e-05	0
NEDD8-conjugating enzyme Ubc12 OS=Mus musculus OX=10090 GN=Ube2m PE=1 SV=1	sp|P61082|UBC12_MOUSE	21	0	0	0	0	0	0	0.000193695	0	0	4.84237e-05
28S ribosomal protein S23, mitochondrial OS=Mus musculus OX=10090 GN=Mrps23 PE=1 SV=1	sp|Q8VE22|RT23_MOUSE	20	0	0	0	0	0	0	0	0.000198872	0	4.97179e-05
Hypoxia up-regulated protein 1 OS=Mus musculus OX=10090 GN=Hyou1 PE=1 SV=1	sp|Q9JKR6|HYOU1_MOUSE	111	0	0	0	0	0	0	3.6645e-05	0	0	9.16125e-06
Transmembrane emp24 domain-containing protein 10 OS=Mus musculus OX=10090 GN=Tmed10 PE=1 SV=1	sp|Q9D1D4|TMEDA_MOUSE	25	0	0	0	0	0	0	0.000162704	0	0	4.06759e-05
Flotillin-1 OS=Mus musculus OX=10090 GN=Flot1 PE=1 SV=1	sp|O08917|FLOT1_MOUSE	48	0	0	0	0	0	0	0	8.28632e-05	0	2.07158e-05
[3-methyl-2-oxobutanoate dehydrogenase [lipoamide]] kinase, mitochondrial OS=Mus musculus OX=10090 GN=Bckdk PE=1 SV=1	sp|O55028|BCKD_MOUSE	47	0	0	0	0	0	0	8.65445e-05	0	0	2.16361e-05
Eukaryotic translation initiation factor 4 gamma 1 OS=Mus musculus OX=10090 GN=Eif4g1 PE=1 SV=1	sp|Q6NZJ6|IF4G1_MOUSE	176	0	0	0	0	0	0	0	3.38986e-05	0	8.47465e-06
Proliferation-associated protein 2G4 OS=Mus musculus OX=10090 GN=Pa2g4 PE=1 SV=3	sp|P50580|PA2G4_MOUSE	44	0	0	0	0	0	0	0	0.000180792	0	4.51981e-05
Coatomer subunit beta OS=Mus musculus OX=10090 GN=Copb1 PE=1 SV=1	sp|Q9JIF7|COPB_MOUSE	107	0	0	0	0	0	0	3.80149e-05	0	0	9.50372e-06
Glycerophosphocholine phosphodiesterase GPCPD1 OS=Mus musculus OX=10090 GN=Gpcpd1 PE=1 SV=1	sp|Q8C0L9|GPCP1_MOUSE	77	0	0	0	0	0	0	5.28259e-05	0	0	1.32065e-05
Chromobox protein homolog 3 OS=Mus musculus OX=10090 GN=Cbx3 PE=1 SV=2	sp|P23198|CBX3_MOUSE	21	0	0	0	0	0	0	0	0.000189402	0	4.73504e-05
WD repeat-containing protein 1 OS=Mus musculus OX=10090 GN=Wdr1 PE=1 SV=3	sp|O88342|WDR1_MOUSE	66	0	0	0	0	0	0	0	6.02641e-05	0	1.5066e-05
Coronin-1A OS=Mus musculus OX=10090 GN=Coro1a PE=1 SV=5	sp|O89053|COR1A_MOUSE	51	0	0	0	0	0	0	0	0.000155978	0	3.89944e-05
Adenylyl cyclase-associated protein 1 OS=Mus musculus OX=10090 GN=Cap1 PE=1 SV=4	sp|P40124|CAP1_MOUSE	52	0	0	0	0	0	0	0	0.000114734	0	2.86834e-05
Prothymosin alpha OS=Mus musculus OX=10090 GN=Ptma PE=1 SV=2	sp|P26350|PTMA_MOUSE	12	0	0	0	0	0	0	0	0.000662906	0	0.000165726
Serine hydroxymethyltransferase, mitochondrial OS=Mus musculus OX=10090 GN=Shmt2 PE=1 SV=1	sp|Q9CZN7|GLYM_MOUSE	56	0	0	0	0	0	0	0	0.000142051	0	3.55128e-05
Dual specificity protein phosphatase 14 OS=Mus musculus OX=10090 GN=Dusp14 PE=2 SV=2	sp|Q9JLY7|DUS14_MOUSE	22	0	0	0	0.000372045	0	0	0	0	9.30114e-05	0
Heterogeneous nuclear ribonucleoprotein D-like OS=Mus musculus OX=10090 GN=Hnrnpdl PE=1 SV=1	sp|Q9Z130|HNRDL_MOUSE	34	0	0	0	0	0	0	0	0.000116983	0	2.92458e-05
Bis(5'-nucleosyl)-tetraphosphatase [asymmetrical] OS=Mus musculus OX=10090 GN=Nudt2 PE=1 SV=3	sp|P56380|AP4A_MOUSE	17	0	0	0	0	0	0	0.00023927	0	0	5.98176e-05
Transgelin-2 OS=Mus musculus OX=10090 GN=Tagln2 PE=1 SV=4	sp|Q9WVA4|TAGL2_MOUSE	22	0	0	0	0	0	0	0	0.000271189	0	6.77972e-05
Heterogeneous nuclear ribonucleoprotein D0 OS=Mus musculus OX=10090 GN=Hnrnpd PE=1 SV=2	sp|Q60668|HNRPD_MOUSE	38	0	0	0	0	0	0	0	0.000157004	0	3.9251e-05
Thymosin beta-10 OS=Mus musculus OX=10090 GN=Tmsb10 PE=1 SV=3	sp|Q6ZWY8|TYB10_MOUSE	5	0	0	0	0	0	0	0	0.00119323	0	0.000298308
Proteasome activator complex subunit 1 OS=Mus musculus OX=10090 GN=Psme1 PE=1 SV=2	sp|P97371|PSME1_MOUSE	29	0	0	0	0	0	0	0	0.000205729	0	5.14323e-05
Proliferating cell nuclear antigen OS=Mus musculus OX=10090 GN=Pcna PE=1 SV=2	sp|P17918|PCNA_MOUSE	29	0	0	0	0	0	0	0	0.000137153	0	3.42882e-05
Proteasome activator complex subunit 2 OS=Mus musculus OX=10090 GN=Psme2 PE=1 SV=4	sp|P97372|PSME2_MOUSE	27	0	0	0	0	0	0	0	0.000147312	0	3.68281e-05
COP9 signalosome complex subunit 4 OS=Mus musculus OX=10090 GN=Cops4 PE=1 SV=1	sp|O88544|CSN4_MOUSE	46	0	0	0	0	0	0	0	8.6466e-05	0	2.16165e-05
Coactosin-like protein OS=Mus musculus OX=10090 GN=Cotl1 PE=1 SV=3	sp|Q9CQI6|COTL1_MOUSE	16	0	0	0	0	0	0	0	0.00024859	0	6.21474e-05
Enhancer of rudimentary homolog OS=Mus musculus OX=10090 GN=Erh PE=1 SV=1	sp|P84089|ERH_MOUSE	12	0	0	0	0	0	0	0	0.000331453	0	8.28632e-05
Histone H1.5 OS=Mus musculus OX=10090 GN=H1-5 PE=1 SV=2	sp|P43276|H15_MOUSE	23	0	0	0	0	0	0	0	0.000172932	0	4.3233e-05
Tripartite motif-containing protein 29 OS=Mus musculus OX=10090 GN=Trim29 PE=1 SV=1	sp|Q8R2Q0|TRI29_MOUSE	66	0.000109946	0	0	0	0	0	0	0	2.74866e-05	0
