# Supplementary material for: Structural Landscape and Deduced Functions of The Cardiac 14-3-3 Protein Interactome
Source: Preprints.org preprint supplement (doi:10.20944/preprints202208.0343.v1), 2022-08-18
Supplement: Supplementary file 10 [file tab6_recorded_in_ANIA.xlsx]

## Sheet: Sheet1
Uniprot	Name	Description	Gold-standard	Reference...5	Mouse	Rat	High-throughput	Reference...9	Contaminants	N_Ohnologs	Members	Candidate lynchpin sites	GO	GAD	N_Cosmic	FamilyID
P31946	1433B	14-3-3 protein beta/alpha OS=Homo sapiens GN=YWHAB PE=1 SV=3	-	-	Q9CQV8	P35213	12	PMID:16959763,PMID:19648646,PMID:19648646,PMID:19834888,PMID:20051463,PMID:19201265,PMID:19046570,PMID:20879785,PMID:22332119,PMID:22837806,PMID:23472066,PMID:24162925	1	6	P31947,P27348,P61981,P63104,P31946,Q04917	S60, S65, T71, T207	GO:0005829 - cytosol, GO:0042470 - melanosome, GO:0048471 - perinuclear region of cytoplasm, GO:0042826 - histone deacetylase binding, GO:0050815 - phosphoserine binding, GO:0019904 - protein domain specific binding, GO:0008633 - activation of pro-apoptotic gene products, GO:0051220 - cytoplasmic sequestering of protein, GO:0035308 - negative regulation of protein amino acid dephosphorylation, GO…	-	20	30
Q04917	1433F	14-3-3 protein eta OS=Homo sapiens GN=YWHAH PE=1 SV=4	-	-	P68510	P68511	10	PMID:16959763,PMID:19648646,PMID:19648646,PMID:19834888,PMID:20051463,PMID:19046570,PMID:20618440,PMID:20879785,PMID:23472066,PMID:24162925	2	6	P31947,P27348,P61981,P63104,P31946,Q04917	S59, S64, T70, S102, T210	GO:0005737 - cytoplasm, GO:0019899 - enzyme binding, GO:0035259 - glucocorticoid receptor binding, GO:0005159 - insulin-like growth factor receptor binding, GO:0019904 - protein domain specific binding, GO:0016563 - transcription activator activity, GO:0006713 - glucocorticoid catabolic process, GO:0042921 - glucocorticoid receptor signaling pathway, GO:0006886 - intracellular protein transport, …	Schizophrenia	18	30
P33176	KINH	Kinesin-1 heavy chain OS=Homo sapiens GN=KIF5B PE=1 SV=1	-	-	Q61768	Q2PQA9	13	PMID:16959763,PMID:15778465,PMID:19648646,PMID:19834888,PMID:15324660,PMID:20051463,PMID:15161933,PMID:14744259,PMID:19046570,PMID:20879785,PMID:17353931,PMID:23472066,PMID:24162925	3	3	O60282,P33176,Q12840	T324	GO:0005871 - kinesin complex, GO:0005874 - microtubule, GO:0048471 - perinuclear region of cytoplasm, GO:0005524 - ATP binding, GO:0008017 - microtubule binding, GO:0003777 - microtubule motor activity, GO:0047496 - vesicle transport along microtubule,	-	69	865
P49411	EFTU	Elongation factor Tu, mitochondrial OS=Homo sapiens GN=TUFM PE=1 SV=2	-	-	Q8BFR5	P85834	3	PMID:19648646,PMID:19046570,PMID:23472066	7	-	-	-	GO:0042645 - mitochondrial nucleoid, GO:0005525 - GTP binding, GO:0003924 - GTPase activity, GO:0005515 - protein binding, GO:0003746 - translation elongation factor activity,	-	20	singleton
P53985	MOT1	Monocarboxylate transporter 1 OS=Homo sapiens GN=SLC16A1 PE=1 SV=3	-	-	P53986	P53987	1	PMID:19648646	-	13	P53985,O60669,O15403,P36021,Q7RTX9,O15375,Q8TF71,Q7RTY0,O15427,O95907,Q6ZSM3,Q7RTY1,Q8NCK7	S244, S461, S466	GO:0016021 - integral to membrane, GO:0005624 - membrane fraction, GO:0005886 - plasma membrane, GO:0015130 - mevalonate transmembrane transporter activity, GO:0005515 - protein binding, GO:0015355 - secondary active monocarboxylate transmembrane transporter activity, GO:0015293 - symporter activity, GO:0015711 - organic anion transport,	-	30	474
Q9H0U4	RAB1B	Ras-related protein Rab-1B OS=Homo sapiens GN=RAB1B PE=1 SV=1	-	-	Q9D1G1	P10536	3	PMID:19648646,PMID:20879785,PMID:23472066	1	-	-	-	GO:0005794 - Golgi apparatus, GO:0016020 - membrane, GO:0005525 - GTP binding, GO:0005515 - protein binding, GO:0015031 - protein transport, GO:0007264 - small GTPase mediated signal transduction,	-	14	singleton
Q01813	K6PP	6-phosphofructokinase type C OS=Homo sapiens GN=PFKP PE=1 SV=2	-	-	Q9WUA3	P47860	4	PMID:15161933,PMID:20879785,PMID:23472066,PMID:24162925	4	3	Q01813,P08237,P17858	-	GO:0005945 - 6-phosphofructokinase complex, GO:0003872 - 6-phosphofructokinase activity, GO:0005524 - ATP binding, GO:0046872 - metal ion binding, GO:0005515 - protein binding, GO:0006096 - glycolysis,	-	93	1951
P36957	ODO2	Dihydrolipoyllysine-residue succinyltransferase component of 2-oxoglutarate dehydrogenase complex, mitochondrial OS=Homo sapiens GN=DLST PE=1 SV=4	-	-	Q9D2G2	F1M530	1	PMID:19046570	1	-	-	-	GO:0005739 - mitochondrion, GO:0004149 - dihydrolipoyllysine-residue succinyltransferase activity, GO:0006099 - tricarboxylic acid cycle,	Alzheimer_Disease	22	singleton
P11217	PYGM	Glycogen phosphorylase, muscle form OS=Homo sapiens GN=PYGM PE=1 SV=6	-	-	Q9WUB3	G3V8V3	1	PMID:19046570	-	3	P11217,P06737,P11216	S15, S430(S461)	GO:0005829 - cytosol, GO:0008184 - glycogen phosphorylase activity, GO:0005515 - protein binding,	-	62	2024
Q9Y2Z0	SUGT1	Suppressor of G2 allele of SKP1 homolog OS=Homo sapiens GN=SUGT1 PE=1 SV=3	-	-	Q9CX34	Q7TQ12	1	PMID:22332119	-	-	-	-	GO:0000776 - kinetochore, GO:0000151 - ubiquitin ligase complex, GO:0005488 - binding, GO:0007067 - mitosis,	-	15	singleton
P12814	ACTN1	Alpha-actinin-1 OS=Homo sapiens GN=ACTN1 PE=1 SV=2	-	-	Q7TPR4	Q6T487	1	PMID:23472066	3	3	P35609,P12814,O43707	T426	GO:0015629 - actin cytoskeleton, GO:0005829 - cytosol, GO:0005925 - focal adhesion, GO:0005730 - nucleolus, GO:0031143 - pseudopodium, GO:0030018 - Z disc, GO:0003779 - actin binding, GO:0005509 - calcium ion binding, GO:0005178 - integrin binding, GO:0017166 - vinculin binding, GO:0048041 - focal adhesion formation, GO:0051271 - negative regulation of cell motion, GO:0042981 - regulation of apop…	-	63	523
Q02218	ODO1	2-oxoglutarate dehydrogenase, mitochondrial OS=Homo sapiens GN=OGDH PE=1 SV=3	-	-	Q60597	Q5XI78	1	PMID:23472066	-	2	Q02218,Q9ULD0	-	GO:0005759 - mitochondrial matrix, GO:0031966 - mitochondrial membrane, GO:0004591 - oxoglutarate dehydrogenase (succinyl-transferring) activity, GO:0030976 - thiamin pyrophosphate binding, GO:0006096 - glycolysis, GO:0055114 - oxidation reduction,	-	64	1684
Q9Y277	VDAC3	Voltage-dependent anion-selective channel protein 3 OS=Homo sapiens GN=VDAC3 PE=1 SV=1	-	-	Q60931	D3ZP84	1	PMID:23472066	1	3	P21796,Q9Y277,P45880	-	GO:0005741 - mitochondrial outer membrane, GO:0046930 - pore complex, GO:0000166 - nucleotide binding, GO:0015288 - porin activity, GO:0005515 - protein binding, GO:0008308 - voltage-gated anion channel activity, GO:0015853 - adenine transport,	-	8	709
