# Supplementary material for: Structural Landscape and Deduced Functions of The Cardiac 14-3-3 Protein Interactome
Source: Preprints.org preprint supplement (doi:10.20944/preprints202208.0343.v1), 2022-08-18
Supplement: Supplementary file 11 [file tab7_STRING.xlsx]

## Sheet: kmeans
#clustering method	cluster number	cluster color	gene count	protein name	protein identifier	protein description
kmeans	1	Green	21	Acadl	10090.ENSMUSP00000027153	Long-chain specific acyl-CoA dehydrogenase, mitochondrial; acyl-Coenzyme A dehydrogenase, long-chain
kmeans	1	Green	21	Acot2	10090.ENSMUSP00000021649	Acyl-coenzyme A thioesterase 2, mitochondrial; Acyl-CoA thioesterases are a group of enzymes that catalyze the hydrolysis of acyl-CoAs to the free fatty acid and coenzyme A (CoASH), providing the potential to regulate intracellular levels of acyl-CoAs, free fatty acids and CoASH. Most active on substrates with chain lengths ranging from C14-C20. The enzyme is involved in enhancing the hepatic fat…
kmeans	1	Green	21	Atp1a2	10090.ENSMUSP00000083077	Sodium/potassium-transporting ATPase subunit alpha-2; This is the catalytic component of the active enzyme, which catalyzes the hydrolysis of ATP coupled with the exchange of sodium and potassium ions across the plasma membrane. This action creates the electrochemical gradient of sodium and potassium ions, providing the energy for active transport of various nutrients (By similarity)
kmeans	1	Green	21	Dlst	10090.ENSMUSP00000060346	Dihydrolipoamide S-succinyltransferase (E2 component of 2-oxo-glutarate complex); The 2-oxoglutarate dehydrogenase complex catalyzes the overall conversion of 2-oxoglutarate to succinyl-CoA and CO(2). It contains multiple copies of 3 enzymatic components: 2-oxoglutarate dehydrogenase (E1), dihydrolipoamide succinyltransferase (E2) and lipoamide dehydrogenase (E3) (By similarity)
kmeans	1	Green	21	Hsd17b10	10090.ENSMUSP00000026289	Mitochondrial dehydrogenase that catalyzes the beta-oxidation at position 17 of androgens and estrogens and has 3-alpha- hydroxysteroid dehydrogenase activity with androsterone (By similarity). Catalyzes the third step in the beta-oxidation of fatty acids (By similarity). Carries out oxidative conversions of 7-alpha-OH and 7-beta-OH bile acids (By similarity). Also exhibits 20-beta-OH and 21-OH d…
kmeans	1	Green	21	Idh2	10090.ENSMUSP00000103007	Isocitrate dehydrogenase [NADP], mitochondrial; Plays a role in intermediary metabolism and energy production. It may tightly associate or interact with the pyruvate dehydrogenase complex; Belongs to the isocitrate and isopropylmalate dehydrogenases family
kmeans	1	Green	21	Letm1	10090.ENSMUSP00000005431	Mitochondrial proton/calcium exchanger protein; Mitochondrial proton/calcium antiporter that mediates proton-dependent calcium efflux from mitochondrion. Crucial for the maintenance of mitochondrial tubular networks and for the assembly of the supercomplexes of the respiratory chain (By similarity). Required for the maintenance of the tubular shape and cristae organization (By similarity). In con…
kmeans	1	Green	21	Ndufb10	10090.ENSMUSP00000043543	NADH dehydrogenase [ubiquinone] 1 beta subcomplex subunit 10; Accessory subunit of the mitochondrial membrane respiratory chain NADH dehydrogenase (Complex I), that is believed not to be involved in catalysis. Complex I functions in the transfer of electrons from NADH to the respiratory chain. The immediate electron acceptor for the enzyme is believed to be ubiquinone
kmeans	1	Green	21	Ndufb6	10090.ENSMUSP00000092746	NADH dehydrogenase [ubiquinone] 1 beta subcomplex subunit 6; Accessory subunit of the mitochondrial membrane respiratory chain NADH dehydrogenase (Complex I), that is believed not to be involved in catalysis. Complex I functions in the transfer of electrons from NADH to the respiratory chain. The immediate electron acceptor for the enzyme is believed to be ubiquinone
kmeans	1	Green	21	Ndufb9	10090.ENSMUSP00000022980	NADH dehydrogenase [ubiquinone] 1 beta subcomplex subunit 9; Accessory subunit of the mitochondrial membrane respiratory chain NADH dehydrogenase (Complex I), that is believed to be not involved in catalysis. Complex I functions in the transfer of electrons from NADH to the respiratory chain. The immediate electron acceptor for the enzyme is believed to be ubiquinone
kmeans	1	Green	21	Nudt8	10090.ENSMUSP00000025802	Nucleoside diphosphate-linked moiety X motif 8; Probably mediates the hydrolysis of some nucleoside diphosphate derivatives
kmeans	1	Green	21	Ogdh	10090.ENSMUSP00000003461	2-oxoglutarate dehydrogenase, mitochondrial; The 2-oxoglutarate dehydrogenase complex catalyzes the overall conversion of 2-oxoglutarate to succinyl-CoA and CO(2). It contains multiple copies of three enzymatic components: 2- oxoglutarate dehydrogenase (E1), dihydrolipoamide succinyltransferase (E2) and lipoamide dehydrogenase (E3)
kmeans	1	Green	21	Pfkl	10090.ENSMUSP00000020522	ATP-dependent 6-phosphofructokinase, liver type; Catalyzes the phosphorylation of D-fructose 6-phosphate to fructose 1,6-bisphosphate by ATP, the first committing step of glycolysis; Belongs to the phosphofructokinase type A (PFKA) family. ATP-dependent PFK group I subfamily. Eukaryotic two domain clade "E" sub-subfamily
kmeans	1	Green	21	Pfkp	10090.ENSMUSP00000117030	ATP-dependent 6-phosphofructokinase, platelet type; Catalyzes the phosphorylation of D-fructose 6-phosphate to fructose 1,6-bisphosphate by ATP, the first committing step of glycolysis; Belongs to the phosphofructokinase type A (PFKA) family. ATP-dependent PFK group I subfamily. Eukaryotic two domain clade "E" sub-subfamily
kmeans	1	Green	21	Ppp1r3a	10090.ENSMUSP00000049054	Protein phosphatase 1 regulatory subunit 3A; Seems to act as a glycogen-targeting subunit for PP1. PP1 is essential for cell division, and participates in the regulation of glycogen metabolism, muscle contractility and protein synthesis. Plays an important role in glycogen synthesis but is not essential for insulin activation of glycogen synthase
kmeans	1	Green	21	Pygm	10090.ENSMUSP00000047564	Glycogen phosphorylase, muscle form; Phosphorylase is an important allosteric enzyme in carbohydrate metabolism. Enzymes from different sources differ in their regulatory mechanisms and in their natural substrates. However, all known phosphorylases share catalytic and structural properties
kmeans	1	Green	21	Rtn2	10090.ENSMUSP00000032559	Reticulon-2; Reticulon 2 (Z-band associated protein)
kmeans	1	Green	21	Ryr2	10090.ENSMUSP00000021750	Ryanodine receptor 2; Calcium channel that mediates the release of Ca(2+) from the sarcoplasmic reticulum into the cytoplasm and thereby plays a key role in triggering cardiac muscle contraction. Aberrant channel activation can lead to cardiac arrhythmia. In cardiac myocytes, calcium release is triggered by increased Ca(2+) levels due to activation of the L-type calcium channel CACNA1C. The calci…
kmeans	1	Green	21	Smyd1	10090.ENSMUSP00000073911	Histone-lysine N-methyltransferase Smyd1; Methylates histone H3 at 'Lys-4' (H3K4me). Acts as a transcriptional repressor. Essential for cardiomyocyte differentiation and cardiac morphogenesis
kmeans	1	Green	21	Vdac3	10090.ENSMUSP00000136273	Voltage-dependent anion-selective channel protein 3; Forms a channel through the mitochondrial outer membrane that allows diffusion of small hydrophilic molecules
kmeans	1	Green	21	Vwa8	10090.ENSMUSP00000048925	Von Willebrand factor A domain-containing protein 8; Exhibits ATPase activity in vitro
kmeans	2	Red	13	Dap3	10090.ENSMUSP00000088456	28S ribosomal protein S29, mitochondrial; Involved in mediating interferon-gamma-induced cell death; Belongs to the mitochondrion-specific ribosomal protein mS29 family
kmeans	2	Red	13	Ddx1	10090.ENSMUSP00000065987	ATP-dependent RNA helicase DDX1; Acts as an ATP-dependent RNA helicase, able to unwind both RNA-RNA and RNA-DNA duplexes. Possesses 5' single-stranded RNA overhang nuclease activity. Possesses ATPase activity on various RNA, but not DNA polynucleotides. May play a role in RNA clearance at DNA double-strand breaks (DSBs), thereby facilitating the template-guided repair of transcriptionally active …
kmeans	2	Red	13	Eef1d	10090.ENSMUSP00000087110	Elongation factor 1-delta; Isoform 1: EF-1-beta and EF-1-delta stimulate the exchange of GDP bound to EF-1-alpha to GTP, regenerating EF-1- alpha for another round of transfer of aminoacyl-tRNAs to the ribosome
kmeans	2	Red	13	F13a1	10090.ENSMUSP00000048667	Coagulation factor XIII A chain; Factor XIII is activated by thrombin and calcium ion to a transglutaminase that catalyzes the formation of gamma-glutamyl- epsilon-lysine cross-links between fibrin chains, thus stabilizing the fibrin clot. Also cross-link alpha-2-plasmin inhibitor, or fibronectin, to the alpha chains of fibrin
kmeans	2	Red	13	Impdh2	10090.ENSMUSP00000079888	Inosine-5'-monophosphate dehydrogenase 2; Catalyzes the conversion of inosine 5'-phosphate (IMP) to xanthosine 5'-phosphate (XMP), the first committed and rate- limiting step in the de novo synthesis of guanine nucleotides, and therefore plays an important role in the regulation of cell growth. Could also have a single-stranded nucleic acid-binding activity and could play a role in RNA and/or DNA…
kmeans	2	Red	13	Mrpl37	10090.ENSMUSP00000030365	Mitochondrial ribosomal protein L37; Belongs to the mitochondrion-specific ribosomal protein mL37 family
kmeans	2	Red	13	Slc16a1	10090.ENSMUSP00000045216	Monocarboxylate transporter 1; Proton-coupled monocarboxylate transporter. Catalyzes the rapid transport across the plasma membrane of many monocarboxylates such as lactate, pyruvate, branched-chain oxo acids derived from leucine, valine and isoleucine, and the ketone bodies acetoacetate, beta-hydroxybutyrate and acetate. Depending on the tissue and on cicumstances, mediates the import or export …
kmeans	2	Red	13	Sugt1	10090.ENSMUSP00000052942	Protein SGT1 homolog; May play a role in ubiquitination and subsequent proteasomal degradation of target proteins
kmeans	2	Red	13	Tcp1	10090.ENSMUSP00000116108	T-complex protein 1 subunit alpha; Molecular chaperone; assists the folding of proteins upon ATP hydrolysis. As part of the BBS/CCT complex may play a role in the assembly of BBSome, a complex involved in ciliogenesis regulating transports vesicles to the cilia. Known to play a role, in vitro, in the folding of actin and tubulin (By similarity); Belongs to the TCP-1 chaperonin family
kmeans	2	Red	13	Tufm	10090.ENSMUSP00000095656	Elongation factor Tu, mitochondrial; This protein promotes the GTP-dependent binding of aminoacyl-tRNA to the A-site of ribosomes during protein biosynthesis
kmeans	2	Red	13	Vars	10090.ENSMUSP00000084572	Valine--tRNA ligase; valyl-tRNA synthetase
kmeans	2	Red	13	Xrcc5	10090.ENSMUSP00000027379	X-ray repair cross-complementing protein 5; Single-stranded DNA-dependent ATP-dependent helicase. Has a role in chromosome translocation. The DNA helicase II complex binds preferentially to fork-like ends of double-stranded DNA in a cell cycle-dependent manner. It works in the 3'-5' direction. Binding to DNA may be mediated by XRCC6. Involved in DNA non-homologous end joining (NHEJ) required for …
kmeans	2	Red	13	Xrcc6	10090.ENSMUSP00000068559	X-ray repair cross-complementing protein 6; Single-stranded DNA-dependent ATP-dependent helicase. Has a role in chromosome translocation. The DNA helicase II complex binds preferentially to fork-like ends of double-stranded DNA in a cell cycle-dependent manner. It works in the 3'-5' direction. Binding to DNA may be mediated by XRCC6. Involved in DNA non-homologous end joining (NHEJ) required for …
kmeans	3	Blue	17	Actn1	10090.ENSMUSP00000021554	Alpha-actinin-1; F-actin cross-linking protein which is thought to anchor actin to a variety of intracellular structures. This is a bundling protein (By similarity)
kmeans	3	Blue	17	Actn4	10090.ENSMUSP00000066068	Alpha-actinin-4; F-actin cross-linking protein which is thought to anchor actin to a variety of intracellular structures. This is a bundling protein. Probably involved in vesicular trafficking via its association with the CART complex. The CART complex is necessary for efficient transferrin receptor recycling but not for EGFR degradation (By similarity). Involved in tight junction assembly in epi…
kmeans	3	Blue	17	Arhgef5	10090.ENSMUSP00000031750	Rho guanine nucleotide exchange factor 5; Guanine nucleotide exchange factor which activates Rho GTPases. Strongly activates RHOA. Also strongly activates RHOB, weakly activates RHOC and RHOG and shows no effect on RHOD, RHOV, RHOQ or RAC1. Involved in regulation of cell shape and actin cytoskeletal organization. Plays a role in actin organization by generating a loss of actin stress fibers and t…
kmeans	3	Blue	17	Cdc42	10090.ENSMUSP00000054634	Cell division control protein 42 homolog; Plasma membrane-associated small GTPase which cycles between an active GTP-bound and an inactive GDP-bound state. In active state binds to a variety of effector proteins to regulate cellular responses. Involved in epithelial cell polarization processes. Regulates the bipolar attachment of spindle microtubules to kinetochores before chromosome congression …
kmeans	3	Blue	17	Col1a2	10090.ENSMUSP00000031668	Collagen alpha-2(I) chain; Type I collagen is a member of group I collagen (fibrillar forming collagen); Belongs to the fibrillar collagen family
kmeans	3	Blue	17	Fam210a	10090.ENSMUSP00000045927	Protein FAM210A; Family with sequence similarity 210, member A; Belongs to the FAM210 family
kmeans	3	Blue	17	Kif5b	10090.ENSMUSP00000025083	Kinesin-1 heavy chain; Microtubule-dependent motor required for normal distribution of mitochondria and lysosomes. May be involved in the mechanisms of growth arrest induced by exposure to DNA-damaging drugs or by cellular senescence. Can induce formation of neurite-like membrane protrusions in non-neuronal cells in a ZFYVE27-dependent manner. Regulates centrosome and nuclear positioning during m…
kmeans	3	Blue	17	Map4	10090.ENSMUSP00000035055	Microtubule-associated protein 4; Non-neuronal microtubule-associated protein. Promotes microtubule assembly
kmeans	3	Blue	17	Mfn1	10090.ENSMUSP00000088801	Mitofusin-1; Mitochondrial outer membrane GTPase that mediates mitochondrial clustering and fusion. Membrane clustering requires GTPase activity (By similarity). It may involve a major rearrangement of the coiled coil domains. Mitochondria are highly dynamic organelles, and their morphology is determined by the equilibrium between mitochondrial fusion and fission events. Overexpression induces th…
kmeans	3	Blue	17	Prkag1	10090.ENSMUSP00000132499	5'-AMP-activated protein kinase subunit gamma-1; AMP/ATP-binding subunit of AMP-activated protein kinase (AMPK), an energy sensor protein kinase that plays a key role in regulating cellular energy metabolism. In response to reduction of intracellular ATP levels, AMPK activates energy-producing pathways and inhibits energy-consuming processes: inhibits protein, carbohydrate and lipid biosynthesis,…
kmeans	3	Blue	17	Rab1b	10090.ENSMUSP00000025804	Ras-related protein Rab-1B; The small GTPases Rab are key regulators of intracellular membrane trafficking, from the formation of transport vesicles to their fusion with membranes. Rabs cycle between an inactive GDP-bound form and an active GTP-bound form that is able to recruit to membranes different set of downstream effectors directly responsible for vesicle formation, movement, tethering and …
kmeans	3	Blue	17	Rac1	10090.ENSMUSP00000079380	Ras-related C3 botulinum toxin substrate 1; Plasma membrane-associated small GTPase which cycles between active GTP-bound and inactive GDP-bound states. In its active state, binds to a variety of effector proteins to regulate cellular responses such as secretory processes, phagocytosis of apoptotic cells, epithelial cell polarization and growth-factor induced formation of membrane ruffles. Rac1 p…
kmeans	3	Blue	17	Vim	10090.ENSMUSP00000028062	Vimentin; Vimentins are class-III intermediate filaments found in various non-epithelial cells, especially mesenchymal cells. Vimentin is attached to the nucleus, endoplasmic reticulum, and mitochondria, either laterally or terminally
kmeans	3	Blue	17	Ywhab	10090.ENSMUSP00000018470	14-3-3 protein beta/alpha; Adapter protein implicated in the regulation of a large spectrum of both general and specialized signaling pathways. Binds to a large number of partners, usually by recognition of a phosphoserine or phosphothreonine motif. Binding generally results in the modulation of the activity of the binding partner. Negative regulator of osteogenesis. Blocks the nuclear translocat…
kmeans	3	Blue	17	Ywhae	10090.ENSMUSP00000070993	14-3-3 protein epsilon; Adapter protein implicated in the regulation of a large spectrum of both general and specialized signaling pathways. Binds to a large number of partners, usually by recognition of a phosphoserine or phosphothreonine motif. Binding generally results in the modulation of the activity of the binding partner. Positively regulates phosphorylated protein HSF1 nuclear export to t…
kmeans	3	Blue	17	Ywhah	10090.ENSMUSP00000019109	14-3-3 protein eta; Adapter protein implicated in the regulation of a large spectrum of both general and specialized signaling pathways. Binds to a large number of partners, usually by recognition of a phosphoserine or phosphothreonine motif. Binding generally results in the modulation of the activity of the binding partner. Negatively regulates the kinase activity of PDPK1 (By similarity)
kmeans	3	Blue	17	Ywhaq	10090.ENSMUSP00000100067	14-3-3 protein theta; Adapter protein implicated in the regulation of a large spectrum of both general and specialized signaling pathways. Binds to a large number of partners, usually by recognition of a phosphoserine or phosphothreonine motif. Binding generally results in the modulation of the activity of the binding partner. Negatively regulates the kinase activity of PDPK1 (By similarity)

## Sheet: green
term description	false discovery rate	category
Mitochondrion	2.61e-05	COMPARTMENTS
Mitochondrial envelope	2.61e-05	COMPARTMENTS
Organelle inner membrane	2.61e-05	COMPARTMENTS
Mitochondrial membrane	2.61e-05	COMPARTMENTS
Organelle envelope	2.61e-05	COMPARTMENTS
mitochondrion	1.69e-06	Component
mitochondrial membrane	4.5e-06	Component
organelle envelope	1.69e-05	Component
oxidoreductase complex	2.1e-05	Component
cytoplasm	3.93e-05	Component
AMP binding	0.0051	Function
small molecule binding	0.0086	Function
6-phosphofructokinase activity	0.015	Function
fructose-6-phosphate binding	0.0236	Function
catalytic activity	0.0315	Function
Metabolic pathways	1e-06	KEGG
Carbon metabolism	2.5e-05	KEGG
Citrate cycle (TCA cycle)	0.00068	KEGG
Prion disease	0.00068	KEGG
Alzheimer disease	0.0018	KEGG
Mitochondrion	5.89e-08	Keyword
Acetylation	0.00019	Keyword
Transit peptide	0.00019	Keyword
Glycolysis	0.0011	Keyword
Allosteric enzyme	0.0028	Keyword
generation of precursor metabolites and energy	1.05e-07	Process
oxidation-reduction process	1.05e-07	Process
energy derivation by oxidation of organic compounds	2.57e-06	Process
ATP metabolic process	5.43e-05	Process
NADH metabolic process	6.56e-05	Process
The citric acid (TCA) cycle and respiratory electron transport	0.00018	RCTM
Metabolism	0.00018	RCTM
Citric acid cycle (TCA cycle)	0.0086	RCTM
TCA cycle	0.0076	WikiPathways
Oxidative phosphorylation	0.0225	WikiPathways

## Sheet: red
term description	false discovery rate	category
Membrane-enclosed lumen	0.0054	COMPARTMENTS
DNA ligase IV complex	0.0054	COMPARTMENTS
Organelle lumen	0.0054	COMPARTMENTS
Ku70:Ku80 complex	0.0054	COMPARTMENTS
Intracellular organelle lumen	0.0054	COMPARTMENTS
Ku70:Ku80 complex	0.0079	Component
nonhomologous end joining complex	0.0177	Component
cytoplasm	0.0407	Component
intracellular non-membrane-bounded organelle	0.0497	Component
Non-homologous end-joining	0.0152	KEGG
Acetylation	2.13e-05	Keyword
Elongation factor	0.02	Keyword
Helicase	0.02	Keyword
Protein biosynthesis	0.02	Keyword
Nucleotide-binding	0.0488	Keyword
Ku70/Ku80 beta-barrel domain	0.0268	Pfam
Ku70/Ku80 C-terminal arm	0.0268	Pfam
Ku70/Ku80 N-terminal alpha/beta domain	0.0268	Pfam
Ku70 and Ku80 are 70kDa and 80kDa subunits of the Lupus Ku autoantigen	0.0024	SMART
Non-homologous end joining	0.0157	WikiPathways

## Sheet: blue
term description	false discovery rate	category
Cytoplasm	0.0008	COMPARTMENTS
Cytosol	0.0008	COMPARTMENTS
Intracellular	0.0031	COMPARTMENTS
Cytoskeleton	0.0031	COMPARTMENTS
Axon	0.0151	COMPARTMENTS
cytosol	0.0013	Component
cell junction	0.0013	Component
supramolecular complex	0.0013	Component
cytoplasm	0.0014	Component
cytoskeleton	0.0031	Component
identical protein binding	0.00011	Function
ion channel binding	0.00015	Function
protein domain specific binding	0.0017	Function
protein binding	0.0018	Function
enzyme binding	0.0018	Function
14-3-3 protein	2.32e-06	InterPro
14-3-3 protein, conserved site	2.32e-06	InterPro
14-3-3 domain	2.32e-06	InterPro
14-3-3 domain superfamily	2.32e-06	InterPro
Viral carcinogenesis	4.42e-10	KEGG
Tight junction	2.39e-05	KEGG
PI3K-Akt signaling pathway	2.96e-05	KEGG
Adherens junction	2.96e-05	KEGG
Focal adhesion	3.07e-05	KEGG
Cytoplasm	0.00016	Keyword
Acetylation	0.0097	Keyword
Isopeptide bond	0.0173	Keyword
Ubl conjugation	0.0174	Keyword
GTP-binding	0.0185	Keyword
14-3-3 domain, and Cystinyl aminopeptidase	0.0016	NetworkNeighborAL
14-3-3 domain	0.0345	NetworkNeighborAL
14-3-3 protein	1.11e-06	Pfam
cellular localization	4.27e-05	Process
establishment of localization in cell	0.00027	Process
intracellular transport	0.00032	Process
regulation of cell morphogenesis involved in differentiation	0.0007	Process
cytoskeleton organization	0.0017	Process
RHO GTPases activate PKNs	1.97e-07	RCTM
Signaling by Rho GTPases	1.6e-06	RCTM
Activation of BAD and translocation to mitochondria	2.45e-06	RCTM
RHO GTPase Effectors	2.45e-06	RCTM
Chk1/Chk2(Cds1) mediated inactivation of Cyclin B:Cdk1 complex	2.45e-06	RCTM
14-3-3 homologues	0.0106	SMART
Ca2+ insensitive EF hand	0.0106	SMART
Alpha 6 beta 4 integrin signaling pathway	3.14e-06	WikiPathways
Myometrial relaxation and contraction pathways	0.004	WikiPathways
Calcium regulation in cardiac cells	0.004	WikiPathways
Focal adhesion	0.0048	WikiPathways
Primary focal segmental glomerulosclerosis (FSGS)	0.0087	WikiPathways
