# Supplementary material for: Structural Landscape and Deduced Functions of The Cardiac 14-3-3 Protein Interactome
Source: Preprints.org preprint supplement (doi:10.20944/preprints202208.0343.v1), 2022-08-18
Supplement: Supplementary file 12 [file tab8_clusterProfiler.xlsx]

## Sheet: BP
ID	Description	GeneRatio	BgRatio	pvalue	p.adjust	qvalue	geneID	Count
GO:0006091	generation of precursor metabolites and energy	9/52	404/23355	2.41901e-07	0.000340596	0.000225859	Dlst/Idh2/Ndufb6/Ndufb9/Ogdh/Pfkl/Pfkp/Ppp1r3a/Pygm	9
GO:0006734	NADH metabolic process	4/52	31/23355	6.57459e-07	0.000462497	0.000306695	Dlst/Ogdh/Pfkl/Pfkp	4
GO:0006972	hyperosmotic response	4/52	35/23355	1.08689e-06	0.000462497	0.000306695	Letm1/Rac1/Xrcc5/Xrcc6	4
GO:0015980	energy derivation by oxidation of organic compounds	7/52	250/23355	1.31391e-06	0.000462497	0.000306695	Dlst/Idh2/Ndufb6/Ndufb9/Ogdh/Ppp1r3a/Pygm	7
GO:0071475	cellular hyperosmotic salinity response	3/52	22/23355	1.55594e-05	0.00412844	0.00273768	Letm1/Xrcc5/Xrcc6	3
GO:0046034	ATP metabolic process	6/52	256/23355	2.1829e-05	0.00412844	0.00273768	Atp1a2/Ndufb6/Ndufb9/Ogdh/Pfkl/Pfkp	6
GO:0071474	cellular hyperosmotic response	3/52	26/23355	2.61044e-05	0.00412844	0.00273768	Letm1/Xrcc5/Xrcc6	3
GO:0045333	cellular respiration	5/52	159/23355	2.75629e-05	0.00412844	0.00273768	Dlst/Idh2/Ndufb6/Ndufb9/Ogdh	5
GO:0042538	hyperosmotic salinity response	3/52	27/23355	2.93213e-05	0.00412844	0.00273768	Letm1/Xrcc5/Xrcc6	3
GO:0071472	cellular response to salt stress	3/52	27/23355	2.93213e-05	0.00412844	0.00273768	Letm1/Xrcc5/Xrcc6	3
GO:0006970	response to osmotic stress	4/52	86/23355	4.05382e-05	0.00516709	0.00342644	Letm1/Rac1/Xrcc5/Xrcc6	4
GO:0006099	tricarboxylic acid cycle	3/52	32/23355	4.93316e-05	0.00516709	0.00342644	Dlst/Idh2/Ogdh	3
GO:0009117	nucleotide metabolic process	7/52	440/23355	5.16905e-05	0.00516709	0.00342644	Acot2/Idh2/Impdh2/Mfn1/Ogdh/Pfkl/Pfkp	7
GO:0071214	cellular response to abiotic stimulus	6/52	304/23355	5.69739e-05	0.00516709	0.00342644	Atp1a2/Eef1d/Letm1/Rac1/Xrcc5/Xrcc6	6
GO:0104004	cellular response to environmental stimulus	6/52	304/23355	5.69739e-05	0.00516709	0.00342644	Atp1a2/Eef1d/Letm1/Rac1/Xrcc5/Xrcc6	6
GO:0006753	nucleoside phosphate metabolic process	7/52	449/23355	5.87169e-05	0.00516709	0.00342644	Acot2/Idh2/Impdh2/Mfn1/Ogdh/Pfkl/Pfkp	7
GO:1904951	positive regulation of establishment of protein localization	6/52	325/23355	8.23612e-05	0.00682144	0.00452349	Arhgef5/Cdc42/Kif5b/Rac1/Tcp1/Ywhae	6
GO:0009651	response to salt stress	3/52	39/23355	8.99011e-05	0.00703226	0.00466329	Letm1/Xrcc5/Xrcc6	3
GO:0009150	purine ribonucleotide metabolic process	6/52	335/23355	9.72651e-05	0.00704713	0.00467315	Acot2/Impdh2/Mfn1/Ogdh/Pfkl/Pfkp	6
GO:0007005	mitochondrion organization	7/52	489/23355	0.000100101	0.00704713	0.00467315	Dap3/Hsd17b10/Letm1/Mfn1/Ndufb10/Ndufb6/Ndufb9	7
GO:0009259	ribonucleotide metabolic process	6/52	354/23355	0.000131468	0.0088146	0.00584521	Acot2/Impdh2/Mfn1/Ogdh/Pfkl/Pfkp	6
GO:0006163	purine nucleotide metabolic process	6/52	360/23355	0.000144053	0.00921938	0.00611363	Acot2/Impdh2/Mfn1/Ogdh/Pfkl/Pfkp	6
GO:0019693	ribose phosphate metabolic process	6/52	365/23355	0.000155255	0.0095043	0.00630256	Acot2/Impdh2/Mfn1/Ogdh/Pfkl/Pfkp	6
GO:0070839	metal ion export	3/52	48/23355	0.000167754	0.00966183	0.00640703	Atp1a2/Letm1/Ywhae	3
GO:0010257	NADH dehydrogenase complex assembly	3/52	49/23355	0.000178414	0.00966183	0.00640703	Ndufb10/Ndufb6/Ndufb9	3
GO:0032981	mitochondrial respiratory chain complex I assembly	3/52	49/23355	0.000178414	0.00966183	0.00640703	Ndufb10/Ndufb6/Ndufb9	3
GO:0021988	olfactory lobe development	3/52	50/23355	0.000189505	0.00976051	0.00647247	Atp1a2/Ogdh/Rac1	3
GO:0072521	purine-containing compound metabolic process	6/52	381/23355	0.000195819	0.00976051	0.00647247	Acot2/Impdh2/Mfn1/Ogdh/Pfkl/Pfkp	6
GO:0071470	cellular response to osmotic stress	3/52	51/23355	0.000201033	0.00976051	0.00647247	Letm1/Xrcc5/Xrcc6	3
GO:0061620	glycolytic process through glucose-6-phosphate	2/52	10/23355	0.000216314	0.0101523	0.0067323	Pfkl/Pfkp	2
GO:2000649	regulation of sodium ion transmembrane transporter activity	3/52	55/23355	0.000251674	0.0114309	0.00758012	Atp1a2/Kif5b/Ywhah	3
GO:1901660	calcium ion export	2/52	11/23355	0.000264007	0.0116163	0.0077031	Letm1/Ywhae	2
GO:0016052	carbohydrate catabolic process	4/52	142/23355	0.000282726	0.012063	0.0079993	Ogdh/Pfkl/Pfkp/Pygm	4
GO:0032412	regulation of ion transmembrane transporter activity	5/52	265/23355	0.000304508	0.0126102	0.00836218	Atp1a2/Kif5b/Ryr2/Ywhae/Ywhah	5
GO:0030388	fructose 1,6-bisphosphate metabolic process	2/52	12/23355	0.000316357	0.0127266	0.00843935	Pfkl/Pfkp	2
GO:0022898	regulation of transmembrane transporter activity	5/52	276/23355	0.000366932	0.0140353	0.0093072	Atp1a2/Kif5b/Ryr2/Ywhae/Ywhah	5
GO:0048548	regulation of pinocytosis	2/52	13/23355	0.000373343	0.0140353	0.0093072	Actn4/Cdc42	2
GO:0071479	cellular response to ionizing radiation	3/52	65/23355	0.000412503	0.0140353	0.0093072	Eef1d/Xrcc5/Xrcc6	3
GO:1902305	regulation of sodium ion transmembrane transport	3/52	65/23355	0.000412503	0.0140353	0.0093072	Atp1a2/Kif5b/Ywhah	3
GO:0006002	fructose 6-phosphate metabolic process	2/52	14/23355	0.000434946	0.0140353	0.0093072	Pfkl/Pfkp	2
GO:0006007	glucose catabolic process	2/52	14/23355	0.000434946	0.0140353	0.0093072	Pfkl/Pfkp	2
GO:0061615	glycolytic process through fructose-6-phosphate	2/52	14/23355	0.000434946	0.0140353	0.0093072	Pfkl/Pfkp	2
GO:0050767	regulation of neurogenesis	6/52	443/23355	0.000438181	0.0140353	0.0093072	Idh2/Mfn1/Vim/Xrcc5/Xrcc6/Ywhah	6
GO:0032409	regulation of transporter activity	5/52	287/23355	0.000438603	0.0140353	0.0093072	Atp1a2/Kif5b/Ryr2/Ywhae/Ywhah	5
GO:0050708	regulation of protein secretion	5/52	299/23355	0.000528348	0.0165314	0.0109624	Idh2/Kif5b/Pfkl/Rac1/Slc16a1	5
GO:0051017	actin filament bundle assembly	4/52	169/23355	0.000546438	0.0167258	0.0110913	Actn1/Actn4/Arhgef5/Rac1	4
GO:0006103	2-oxoglutarate metabolic process	2/52	16/23355	0.000571922	0.0171242	0.0113555	Dlst/Ogdh	2
GO:0061572	actin filament bundle organization	4/52	172/23355	0.00058378	0.0171242	0.0113555	Actn1/Actn4/Arhgef5/Rac1	4
GO:0051222	positive regulation of protein transport	5/52	309/23355	0.000613158	0.0176189	0.0116836	Arhgef5/Cdc42/Kif5b/Rac1/Ywhae	5
GO:0009060	aerobic respiration	3/52	76/23355	0.000652548	0.0183757	0.0121855	Dlst/Idh2/Ogdh	3
GO:0044282	small molecule catabolic process	5/52	316/23355	0.000678344	0.0187276	0.0124188	Acadl/Acot2/Hsd17b10/Pfkl/Pfkp	5
GO:0048813	dendrite morphogenesis	4/52	185/23355	0.000766774	0.0207619	0.0137678	Cdc42/Mfn1/Rac1/Ywhah	4
GO:0050796	regulation of insulin secretion	4/52	191/23355	0.000863578	0.0227743	0.0151023	Kif5b/Pfkl/Rac1/Slc16a1	4
GO:0033108	mitochondrial respiratory chain complex assembly	3/52	84/23355	0.000873445	0.0227743	0.0151023	Ndufb10/Ndufb6/Ndufb9	3
GO:0002791	regulation of peptide secretion	5/52	338/23355	0.000917358	0.0234814	0.0155711	Idh2/Kif5b/Pfkl/Rac1/Slc16a1	5
GO:1901019	regulation of calcium ion transmembrane transporter activity	3/52	86/23355	0.000935192	0.0234814	0.0155711	Atp1a2/Ryr2/Ywhae	3
GO:0120032	regulation of plasma membrane bounded cell projection assembly	4/52	196/23355	0.000950594	0.0234814	0.0155711	Cdc42/Map4/Rac1/Vdac3	4
GO:0060491	regulation of cell projection assembly	4/52	198/23355	0.00098707	0.0237155	0.0157264	Cdc42/Map4/Rac1/Vdac3	4
GO:0051481	negative regulation of cytosolic calcium ion concentration	2/52	21/23355	0.000993758	0.0237155	0.0157264	Atp1a2/Ryr2	2
GO:1902115	regulation of organelle assembly	4/52	201/23355	0.00104362	0.0243316	0.0161349	Arhgef5/Map4/Rab1b/Vdac3	4
GO:0006120	mitochondrial electron transport, NADH to ubiquinone	2/52	22/23355	0.00109158	0.0243316	0.0161349	Ndufb6/Ndufb9	2
GO:1903975	regulation of glial cell migration	2/52	22/23355	0.00109158	0.0243316	0.0161349	Idh2/Vim	2
GO:0006096	glycolytic process	3/52	93/23355	0.00117289	0.0243316	0.0161349	Ogdh/Pfkl/Pfkp	3
GO:0006907	pinocytosis	2/52	23/23355	0.00119384	0.0243316	0.0161349	Actn4/Cdc42	2
GO:0019320	hexose catabolic process	2/52	23/23355	0.00119384	0.0243316	0.0161349	Pfkl/Pfkp	2
GO:0019674	NAD metabolic process	2/52	23/23355	0.00119384	0.0243316	0.0161349	Pfkl/Pfkp	2
GO:0036336	dendritic cell migration	2/52	23/23355	0.00119384	0.0243316	0.0161349	Arhgef5/Cdc42	2
GO:0043271	negative regulation of ion transport	5/52	359/23355	0.00119938	0.0243316	0.0161349	Atp1a2/Idh2/Pfkl/Ywhae/Ywhaq	5
GO:0002028	regulation of sodium ion transport	3/52	94/23355	0.00120967	0.0243316	0.0161349	Atp1a2/Kif5b/Ywhah	3
GO:0006757	ATP generation from ADP	3/52	94/23355	0.00120967	0.0243316	0.0161349	Ogdh/Pfkl/Pfkp	3
GO:0009062	fatty acid catabolic process	3/52	97/23355	0.00132433	0.0261677	0.0173526	Acadl/Acot2/Hsd17b10	3
GO:0010720	positive regulation of cell development	5/52	368/23355	0.00133812	0.0261677	0.0173526	Mfn1/Rac1/Vim/Xrcc5/Xrcc6	5
GO:1904062	regulation of cation transmembrane transport	5/52	370/23355	0.0013705	0.0264338	0.017529	Atp1a2/Kif5b/Ryr2/Ywhae/Ywhah	5
GO:0010165	response to X-ray	2/52	25/23355	0.00141159	0.0268584	0.0178105	Xrcc5/Xrcc6	2
GO:0021761	limbic system development	3/52	101/23355	0.00148754	0.0276225	0.0183172	Atp1a2/Ogdh/Ywhae	3
GO:0046039	GTP metabolic process	2/52	26/23355	0.00152705	0.0276225	0.0183172	Impdh2/Mfn1	2
GO:0046365	monosaccharide catabolic process	2/52	26/23355	0.00152705	0.0276225	0.0183172	Pfkl/Pfkp	2
GO:0046031	ADP metabolic process	3/52	102/23355	0.00153022	0.0276225	0.0183172	Ogdh/Pfkl/Pfkp	3
GO:0009135	purine nucleoside diphosphate metabolic process	3/52	106/23355	0.00170862	0.0299351	0.0198508	Ogdh/Pfkl/Pfkp	3
GO:0009179	purine ribonucleoside diphosphate metabolic process	3/52	106/23355	0.00170862	0.0299351	0.0198508	Ogdh/Pfkl/Pfkp	3
GO:0006165	nucleoside diphosphate phosphorylation	3/52	107/23355	0.00175516	0.0299351	0.0198508	Ogdh/Pfkl/Pfkp	3
GO:0009306	protein secretion	5/52	392/23355	0.00176612	0.0299351	0.0198508	Idh2/Kif5b/Pfkl/Rac1/Slc16a1	5
GO:0071480	cellular response to gamma radiation	2/52	28/23355	0.00177103	0.0299351	0.0198508	Xrcc5/Xrcc6	2
GO:0035592	establishment of protein localization to extracellular region	5/52	393/23355	0.0017859	0.0299351	0.0198508	Idh2/Kif5b/Pfkl/Rac1/Slc16a1	5
GO:0030073	insulin secretion	4/52	234/23355	0.00182417	0.0302169	0.0200377	Kif5b/Pfkl/Rac1/Slc16a1	4
GO:0090276	regulation of peptide hormone secretion	4/52	235/23355	0.00185273	0.0303331	0.0201147	Kif5b/Pfkl/Rac1/Slc16a1	4
GO:0002888	positive regulation of myeloid leukocyte mediated immunity	2/52	29/23355	0.00189951	0.0303924	0.020154	Ddx1/Ighg2a	2
GO:0046939	nucleotide phosphorylation	3/52	110/23355	0.00189952	0.0303924	0.020154	Ogdh/Pfkl/Pfkp	3
GO:0071692	protein localization to extracellular region	5/52	400/23355	0.00192894	0.0304948	0.020222	Idh2/Kif5b/Pfkl/Rac1/Slc16a1	5
GO:0009185	ribonucleoside diphosphate metabolic process	3/52	111/23355	0.00194924	0.0304948	0.020222	Ogdh/Pfkl/Pfkp	3
GO:0043552	positive regulation of phosphatidylinositol 3-kinase activity	2/52	30/23355	0.00203229	0.0313907	0.020816	Cdc42/Rac1	2
GO:0071346	cellular response to interferon-gamma	3/52	113/23355	0.0020511	0.0313907	0.020816	Cdc42/Kif5b/Vim	3
GO:0002026	regulation of the force of heart contraction	2/52	31/23355	0.00216936	0.0324943	0.0215479	Atp1a2/Ryr2	2
GO:1901020	negative regulation of calcium ion transmembrane transporter activity	2/52	31/23355	0.00216936	0.0324943	0.0215479	Atp1a2/Ywhae	2
GO:0010769	regulation of cell morphogenesis involved in differentiation	3/52	116/23355	0.00221	0.0327545	0.0217204	Actn4/Mfn1/Rac1	3
GO:0072329	monocarboxylic acid catabolic process	3/52	117/23355	0.00226462	0.0332144	0.0220254	Acadl/Acot2/Hsd17b10	3
GO:0032212	positive regulation of telomere maintenance via telomerase	2/52	32/23355	0.0023107	0.0335409	0.0222419	Tcp1/Xrcc5	2
GO:0021537	telencephalon development	4/52	255/23355	0.00249122	0.0354341	0.0234973	Atp1a2/Ogdh/Rac1/Ywhae	4
GO:0006090	pyruvate metabolic process	3/52	121/23355	0.00249146	0.0354341	0.0234973	Ogdh/Pfkl/Pfkp	3
GO:0090218	positive regulation of lipid kinase activity	2/52	34/23355	0.00260609	0.0366938	0.0243327	Cdc42/Rac1	2
GO:0000723	telomere maintenance	3/52	124/23355	0.0026705	0.0372284	0.0246872	Tcp1/Xrcc5/Xrcc6	3
GO:0045807	positive regulation of endocytosis	3/52	125/23355	0.0027319	0.0373093	0.0247409	Actn4/Cdc42/Ighg2a	3
GO:0021884	forebrain neuron development	2/52	35/23355	0.00276011	0.0373093	0.0247409	Ogdh/Rac1	2
GO:0035308	negative regulation of protein dephosphorylation	2/52	35/23355	0.00276011	0.0373093	0.0247409	Ywhab/Ywhae	2
GO:0032200	telomere organization	3/52	126/23355	0.00279417	0.0373093	0.0247409	Tcp1/Xrcc5/Xrcc6	3
GO:0009132	nucleoside diphosphate metabolic process	3/52	127/23355	0.00285731	0.0373093	0.0247409	Ogdh/Pfkl/Pfkp	3
GO:0010212	response to ionizing radiation	3/52	127/23355	0.00285731	0.0373093	0.0247409	Eef1d/Xrcc5/Xrcc6	3
GO:0007264	small GTPase mediated signal transduction	5/52	439/23355	0.0028845	0.0373093	0.0247409	Arhgef5/Cdc42/Col1a2/Rac1/Ywhaq	5
GO:1904358	positive regulation of telomere maintenance via telomere lengthening	2/52	36/23355	0.00291832	0.0373093	0.0247409	Tcp1/Xrcc5	2
GO:0060996	dendritic spine development	3/52	128/23355	0.00292132	0.0373093	0.0247409	Cdc42/Mfn1/Rac1	3
GO:0002790	peptide secretion	5/52	441/23355	0.00294129	0.0373093	0.0247409	Idh2/Kif5b/Pfkl/Rac1/Slc16a1	5
GO:0030048	actin filament-based movement	3/52	129/23355	0.00298621	0.037541	0.0248945	Actn4/Atp1a2/Ryr2	3
GO:0007015	actin filament organization	5/52	445/23355	0.00305731	0.0377185	0.0250122	Actn1/Actn4/Arhgef5/Cdc42/Rac1	5
GO:0086004	regulation of cardiac muscle cell contraction	2/52	37/23355	0.0030807	0.0377185	0.0250122	Atp1a2/Ryr2	2
GO:1901068	guanosine-containing compound metabolic process	2/52	37/23355	0.0030807	0.0377185	0.0250122	Impdh2/Mfn1	2
GO:0042391	regulation of membrane potential	5/52	451/23355	0.0032375	0.0392966	0.0260587	Kif5b/Mfn1/Ryr2/Ywhae/Ywhah	5
GO:0034766	negative regulation of ion transmembrane transport	3/52	135/23355	0.00339424	0.040783	0.0270444	Atp1a2/Ywhae/Ywhaq	3
GO:0002218	activation of innate immune response	2/52	39/23355	0.0034179	0.040783	0.0270444	Xrcc5/Xrcc6	2
GO:0034763	negative regulation of transmembrane transport	3/52	136/23355	0.00346539	0.0410023	0.0271898	Atp1a2/Ywhae/Ywhaq	3
GO:0034341	response to interferon-gamma	3/52	137/23355	0.00353746	0.041463	0.0274953	Cdc42/Kif5b/Vim	3
GO:0043551	regulation of phosphatidylinositol 3-kinase activity	2/52	40/23355	0.00359268	0.041463	0.0274953	Cdc42/Rac1	2
GO:0060251	regulation of glial cell proliferation	2/52	40/23355	0.00359268	0.041463	0.0274953	Idh2/Vim	2
GO:0030072	peptide hormone secretion	4/52	289/23355	0.00389941	0.0440596	0.0292172	Kif5b/Pfkl/Rac1/Slc16a1	4
GO:0070588	calcium ion transmembrane transport	4/52	289/23355	0.00389941	0.0440596	0.0292172	Atp1a2/Letm1/Ryr2/Ywhae	4
GO:0090316	positive regulation of intracellular protein transport	3/52	142/23355	0.00391154	0.0440596	0.0292172	Cdc42/Kif5b/Ywhae	3
GO:0050769	positive regulation of neurogenesis	4/52	291/23355	0.00399603	0.044654	0.0296113	Mfn1/Vim/Xrcc5/Xrcc6	4
GO:0035774	positive regulation of insulin secretion involved in cellular response to glucose stimulus	2/52	43/23355	0.00414153	0.0452649	0.0300164	Kif5b/Rac1	2
GO:1903170	negative regulation of calcium ion transmembrane transport	2/52	43/23355	0.00414153	0.0452649	0.0300164	Atp1a2/Ywhae	2
GO:0035725	sodium ion transmembrane transport	3/52	145/23355	0.00414714	0.0452649	0.0300164	Atp1a2/Kif5b/Ywhah	3
GO:0006874	cellular calcium ion homeostasis	5/52	480/23355	0.00421833	0.0456878	0.0302968	Atp1a2/Letm1/Pygm/Ryr2/Ywhae	5
GO:1903115	regulation of actin filament-based movement	2/52	45/23355	0.00452768	0.0486639	0.0322704	Atp1a2/Ryr2	2
GO:0046883	regulation of hormone secretion	4/52	303/23355	0.00461002	0.0491735	0.0326084	Kif5b/Pfkl/Rac1/Slc16a1	4
GO:0051051	negative regulation of transport	5/52	492/23355	0.00468064	0.0495514	0.0328589	Atp1a2/Idh2/Pfkl/Ywhae/Ywhaq	5
GO:0045740	positive regulation of DNA replication	2/52	46/23355	0.00472677	0.0496664	0.0329351	Cdc42/Rac1	2
GO:0051271	negative regulation of cellular component movement	4/52	306/23355	0.00477291	0.0497797	0.0330103	Actn1/Actn4/Idh2/Rac1	4

## Sheet: CC
ID	Description	GeneRatio	BgRatio	pvalue	p.adjust	qvalue	geneID	Count
GO:0005743	mitochondrial inner membrane	9/52	448/23177	6.12396e-07	0.000114518	7.41322e-05	Hsd17b10/Idh2/Letm1/Mfn1/Ndufb10/Ndufb6/Ndufb9/Tufm/Vdac3	9
GO:0019866	organelle inner membrane	9/52	492/23177	1.33082e-06	0.000124431	8.05494e-05	Hsd17b10/Idh2/Letm1/Mfn1/Ndufb10/Ndufb6/Ndufb9/Tufm/Vdac3	9
GO:0098798	mitochondrial protein-containing complex	7/52	266/23177	2.08656e-06	0.000130062	8.41943e-05	Dap3/Hsd17b10/Mfn1/Mrpl37/Ndufb10/Ndufb6/Ndufb9	7
GO:1990204	oxidoreductase complex	5/52	112/23177	5.22305e-06	0.000244177	0.000158066	Dlst/Ndufb10/Ndufb6/Ndufb9/Ogdh	5
GO:0030018	Z disc	5/52	127/23177	9.65043e-06	0.000360926	0.000233642	Actn1/Actn4/Pygm/Rtn2/Ryr2	5
GO:0031674	I band	5/52	140/23177	1.54839e-05	0.000482583	0.000312395	Actn1/Actn4/Pygm/Rtn2/Ryr2	5
GO:0030017	sarcomere	5/52	191/23177	6.84635e-05	0.00182895	0.00118396	Actn1/Actn4/Pygm/Rtn2/Ryr2	5
GO:0043209	myelin sheath	5/52	213/23177	0.000114408	0.00248356	0.00160771	Atp1a2/Cdc42/Dlst/Tcp1/Tufm	5
GO:0030016	myofibril	5/52	215/23177	0.00011953	0.00248356	0.00160771	Actn1/Actn4/Pygm/Rtn2/Ryr2	5
GO:0043292	contractile fiber	5/52	229/23177	0.000160494	0.00295721	0.00191432	Actn1/Actn4/Pygm/Rtn2/Ryr2	5
GO:0005747	mitochondrial respiratory chain complex I	3/52	51/23177	0.000205582	0.00295721	0.00191432	Ndufb10/Ndufb6/Ndufb9	3
GO:0030964	NADH dehydrogenase complex	3/52	51/23177	0.000205582	0.00295721	0.00191432	Ndufb10/Ndufb6/Ndufb9	3
GO:0045271	respiratory chain complex I	3/52	51/23177	0.000205582	0.00295721	0.00191432	Ndufb10/Ndufb6/Ndufb9	3
GO:0005759	mitochondrial matrix	5/52	275/23177	0.000373662	0.00449566	0.00291022	Acadl/Dap3/Hsd17b10/Mrpl37/Tufm	5
GO:0045239	tricarboxylic acid cycle enzyme complex	2/52	13/23177	0.000379054	0.00449566	0.00291022	Dlst/Ogdh	2
GO:0014704	intercalated disc	3/52	63/23177	0.000384655	0.00449566	0.00291022	Actn1/Atp1a2/Ywhah	3
GO:0016529	sarcoplasmic reticulum	3/52	75/23177	0.000641791	0.0070597	0.00457003	Pygm/Rtn2/Ryr2	3
GO:0005746	mitochondrial respirasome	3/52	79/23177	0.000746875	0.00775921	0.00502285	Ndufb10/Ndufb6/Ndufb9	3
GO:0098803	respiratory chain complex	3/52	82/23177	0.00083247	0.00819326	0.00530382	Ndufb10/Ndufb6/Ndufb9	3
GO:0016528	sarcoplasm	3/52	84/23177	0.000892854	0.00834818	0.00540412	Pygm/Rtn2/Ryr2	3
GO:0044291	cell-cell contact zone	3/52	86/23177	0.000955951	0.00851252	0.00551049	Actn1/Atp1a2/Ywhah	3
GO:0000242	pericentriolar material	2/52	22/23177	0.00110817	0.0089953	0.00582302	Rac1/Tcp1	2
GO:0070469	respirasome	3/52	91/23177	0.00112587	0.0089953	0.00582302	Ndufb10/Ndufb6/Ndufb9	3
GO:0043197	dendritic spine	4/52	205/23177	0.00115448	0.0089953	0.00582302	Actn1/Atp1a2/Cdc42/Rac1	4
GO:0044309	neuron spine	4/52	210/23177	0.00126177	0.009438	0.0061096	Actn1/Atp1a2/Cdc42/Rac1	4
GO:0045335	phagocytic vesicle	3/52	111/23177	0.00199191	0.0143265	0.00927409	Cdc42/Kif5b/Vim	3
GO:1990391	DNA repair complex	2/52	35/23177	0.00280166	0.0194041	0.012561	Xrcc5/Xrcc6	2
GO:0098800	inner mitochondrial membrane protein complex	3/52	131/23177	0.00318617	0.021279	0.0137748	Ndufb10/Ndufb6/Ndufb9	3
GO:0005777	peroxisome	3/52	146/23177	0.0043183	0.0269174	0.0174247	Idh2/Vim/Vwa8	3
GO:0042579	microbody	3/52	146/23177	0.0043183	0.0269174	0.0174247	Idh2/Vim/Vwa8	3
GO:0009295	nucleoid	2/52	47/23177	0.00500341	0.0292387	0.0189274	Hsd17b10/Tufm	2
GO:0042645	mitochondrial nucleoid	2/52	47/23177	0.00500341	0.0292387	0.0189274	Hsd17b10/Tufm	2
GO:0005871	kinesin complex	2/52	52/23177	0.00609369	0.0339158	0.0219551	Kif5b/Ywhae	2
GO:0042383	sarcolemma	3/52	166/23177	0.00616651	0.0339158	0.0219551	Atp1a2/Rtn2/Ryr2	3

## Sheet: MF
ID	Description	GeneRatio	BgRatio	pvalue	p.adjust	qvalue	geneID	Count
GO:0016208	AMP binding	4/50	18/22682	6.24804e-08	1.46204e-05	9.73379e-06	Pfkl/Pfkp/Prkag1/Pygm	4
GO:0044325	ion channel binding	5/50	143/22682	1.56579e-05	0.00183198	0.00121967	Actn1/Actn4/Ywhae/Ywhah/Ywhaq	5
GO:0001882	nucleoside binding	6/50	376/22682	0.000171192	0.013353	0.00889	Actn4/Cdc42/Mfn1/Rab1b/Rac1/Tufm	6
GO:0016887	ATPase activity	6/50	456/22682	0.000480139	0.0201914	0.0134427	Atp1a2/Ddx1/Kif5b/Vwa8/Xrcc5/Xrcc6	6
GO:0003924	GTPase activity	5/50	298/22682	0.000494383	0.0201914	0.0134427	Cdc42/Mfn1/Rab1b/Rac1/Tufm	5
GO:0097110	scaffold protein binding	3/50	73/22682	0.000562352	0.0201914	0.0134427	Ryr2/Vim/Ywhae	3
GO:0003746	translation elongation factor activity	2/50	17/22682	0.000634122	0.0201914	0.0134427	Eef1d/Tufm	2
GO:0003725	double-stranded RNA binding	3/50	85/22682	0.000876613	0.0201914	0.0134427	Actn1/Ddx1/Vim	3
GO:0019200	carbohydrate kinase activity	2/50	21/22682	0.000973658	0.0201914	0.0134427	Pfkl/Pfkp	2
GO:0005525	GTP binding	5/50	356/22682	0.0010993	0.0201914	0.0134427	Cdc42/Mfn1/Rab1b/Rac1/Tufm	5
GO:0032550	purine ribonucleoside binding	5/50	363/22682	0.00119848	0.0201914	0.0134427	Cdc42/Mfn1/Rab1b/Rac1/Tufm	5
GO:0032549	ribonucleoside binding	5/50	366/22682	0.00124296	0.0201914	0.0134427	Cdc42/Mfn1/Rab1b/Rac1/Tufm	5
GO:0001883	purine nucleoside binding	5/50	367/22682	0.00125805	0.0201914	0.0134427	Cdc42/Mfn1/Rab1b/Rac1/Tufm	5
GO:0030742	GTP-dependent protein binding	2/50	24/22682	0.00127427	0.0201914	0.0134427	Cdc42/Rac1	2
GO:0051087	chaperone binding	3/50	101/22682	0.00144294	0.0201914	0.0134427	Atp1a2/Dlst/Ogdh	3
GO:0019001	guanyl nucleotide binding	5/50	380/22682	0.00146689	0.0201914	0.0134427	Cdc42/Mfn1/Rab1b/Rac1/Tufm	5
GO:0032561	guanyl ribonucleotide binding	5/50	380/22682	0.00146689	0.0201914	0.0134427	Cdc42/Mfn1/Rab1b/Rac1/Tufm	5
GO:0008022	protein C-terminus binding	4/50	234/22682	0.00175291	0.0227878	0.0151714	Xrcc5/Xrcc6/Ywhab/Ywhaq	4
GO:0042162	telomeric DNA binding	2/50	34/22682	0.00255392	0.031019	0.0206514	Xrcc5/Xrcc6	2
GO:0042826	histone deacetylase binding	3/50	125/22682	0.00265119	0.031019	0.0206514	Rac1/Ywhab/Ywhae	3
GO:0030246	carbohydrate binding	4/50	275/22682	0.00314224	0.0350136	0.0233109	Pfkl/Pfkp/Ppp1r3a/Pygm	4
GO:0016616	oxidoreductase activity, acting on the CH-OH group of donors, NAD or NADP as acceptor	3/50	142/22682	0.0037972	0.0403884	0.0268893	Hsd17b10/Idh2/Impdh2	3
GO:0031072	heat shock protein binding	3/50	146/22682	0.00410427	0.0407875	0.027155	Dlst/Eef1d/Ogdh	3
GO:0004386	helicase activity	3/50	147/22682	0.00418334	0.0407875	0.027155	Ddx1/Xrcc5/Xrcc6	3
GO:0016614	oxidoreductase activity, acting on CH-OH group of donors	3/50	151/22682	0.00450884	0.0420948	0.0280253	Hsd17b10/Idh2/Impdh2	3
GO:0035257	nuclear hormone receptor binding	3/50	153/22682	0.0046772	0.0420948	0.0280253	Actn4/Hsd17b10/Ywhah	3
GO:0030374	nuclear receptor coactivator activity	2/50	50/22682	0.00545287	0.0472582	0.031463	Actn1/Actn4	2
GO:0008094	DNA-dependent ATPase activity	2/50	51/22682	0.00566749	0.047364	0.0315334	Xrcc5/Xrcc6	2

## Sheet: KEGG
ID	Description	GeneRatio	BgRatio	pvalue	p.adjust	qvalue	geneID	Count
mmu05203	Viral carcinogenesis	9/37	229/8917	2.76167e-07	3.92157e-05	2.67446e-05	Actn1/Actn4/Cdc42/Rac1/Vdac3/Ywhab/Ywhae/Ywhah/Ywhaq	9
mmu05415	Diabetic cardiomyopathy	7/37	211/8917	2.11686e-05	0.00150297	0.00102501	Col1a2/Ndufb10/Ndufb6/Ndufb9/Rac1/Ryr2/Vdac3	7
mmu04932	Non-alcoholic fatty liver disease	6/37	156/8917	3.86602e-05	0.00182991	0.00124798	Cdc42/Ndufb10/Ndufb6/Ndufb9/Prkag1/Rac1	6
mmu05020	Prion disease	7/37	268/8917	9.7309e-05	0.002779	0.00189524	Kif5b/Ndufb10/Ndufb6/Ndufb9/Rac1/Ryr2/Vdac3	7
mmu05022	Pathways of neurodegeneration - multiple diseases	9/37	471/8917	9.78523e-05	0.002779	0.00189524	Hsd17b10/Kif5b/Mfn1/Ndufb10/Ndufb6/Ndufb9/Rac1/Ryr2/Vdac3	9
mmu01200	Carbon metabolism	5/37	121/8917	0.000130414	0.00308648	0.00210494	Dlst/Idh2/Ogdh/Pfkl/Pfkp	5
mmu04520	Adherens junction	4/37	71/8917	0.000199872	0.00405454	0.00276514	Actn1/Actn4/Cdc42/Rac1	4
mmu00020	Citrate cycle (TCA cycle)	3/37	32/8917	0.000300273	0.00532984	0.00363488	Dlst/Idh2/Ogdh	3
mmu04530	Tight junction	5/37	167/8917	0.000582341	0.00918805	0.00626613	Actn1/Actn4/Cdc42/Prkag1/Rac1	5
mmu05012	Parkinson disease	6/37	264/8917	0.000683298	0.00970284	0.00661721	Kif5b/Mfn1/Ndufb10/Ndufb6/Ndufb9/Vdac3	6
mmu04922	Glucagon signaling pathway	4/37	104/8917	0.000857909	0.0110748	0.00755289	Pfkl/Pfkp/Prkag1/Pygm	4
mmu03450	Non-homologous end-joining	2/37	13/8917	0.00126971	0.0139338	0.00950264	Xrcc5/Xrcc6	2
mmu04510	Focal adhesion	5/37	201/8917	0.00134207	0.0139338	0.00950264	Actn1/Actn4/Cdc42/Col1a2/Rac1	5
mmu04670	Leukocyte transendothelial migration	4/37	118/8917	0.00137375	0.0139338	0.00950264	Actn1/Actn4/Cdc42/Rac1	4
mmu04114	Oocyte meiosis	4/37	121/8917	0.00150741	0.0142702	0.00973206	Ywhab/Ywhae/Ywhah/Ywhaq	4
mmu04110	Cell cycle	4/37	125/8917	0.00169943	0.0150824	0.010286	Ywhab/Ywhae/Ywhah/Ywhaq	4
mmu05208	Chemical carcinogenesis - reactive oxygen species	5/37	222/8917	0.00208109	0.0173832	0.0118551	Ndufb10/Ndufb6/Ndufb9/Rac1/Vdac3	5
mmu05230	Central carbon metabolism in cancer	3/37	69/8917	0.00285438	0.0225179	0.0153569	Idh2/Pfkl/Pfkp	3
mmu04151	PI3K-Akt signaling pathway	6/37	359/8917	0.00329548	0.0246294	0.0167969	Col1a2/Rac1/Ywhab/Ywhae/Ywhah/Ywhaq	6
mmu04390	Hippo signaling pathway	4/37	157/8917	0.00388667	0.0275953	0.0188197	Ywhab/Ywhae/Ywhah/Ywhaq	4
mmu01230	Biosynthesis of amino acids	3/37	79/8917	0.00418741	0.0283149	0.0193104	Idh2/Pfkl/Pfkp	3
mmu05010	Alzheimer disease	6/37	383/8917	0.00453184	0.0286451	0.0195356	Hsd17b10/Kif5b/Ndufb10/Ndufb6/Ndufb9/Vdac3	6
mmu05160	Hepatitis C	4/37	165/8917	0.0046397	0.0286451	0.0195356	Ywhab/Ywhae/Ywhah/Ywhaq	4
mmu00052	Galactose metabolism	2/37	32/8917	0.00768377	0.0436017	0.0297358	Pfkl/Pfkp	2
mmu05016	Huntington disease	5/37	302/8917	0.00772145	0.0436017	0.0297358	Kif5b/Ndufb10/Ndufb6/Ndufb9/Vdac3	5
mmu00030	Pentose phosphate pathway	2/37	33/8917	0.00815824	0.0436017	0.0297358	Pfkl/Pfkp	2
mmu04933	AGE-RAGE signaling pathway in diabetic complications	3/37	101/8917	0.00829046	0.0436017	0.0297358	Cdc42/Col1a2/Rac1	3
mmu00051	Fructose and mannose metabolism	2/37	36/8917	0.00965864	0.0475346	0.032418	Pfkl/Pfkp	2
mmu05146	Amoebiasis	3/37	107/8917	0.00970778	0.0475346	0.032418	Actn1/Actn4/Col1a2	3
mmu04931	Insulin resistance	3/37	110/8917	0.0104663	0.0495407	0.0337861	Ppp1r3a/Prkag1/Pygm	3
