# Supplementary material for: Structural Landscape and Deduced Functions of The Cardiac 14-3-3 Protein Interactome
Source: Preprints.org preprint supplement (doi:10.20944/preprints202208.0343.v1), 2022-08-18
Supplement: Supplementary file 13 [file tab9_REVIGO.xlsx]

## Sheet: BP
TermID	Name	Frequency	PlotX	PlotY	LogSize	Value	Uniqueness	Dispensability	Representative	Eliminated
GO:0006091	"generation of precursor metabolites and energy"	3.31057	0.414574	8.75639	5.90388	-3.46776	0.956563	0	null	False
GO:0006972	"hyperosmotic response"	0.00682812	-6.00725	-2.7792	3.21854	-3.33489	0.869095	0	null	False
GO:0009651	"response to salt stress"	0.0288037	null	null	3.84348	-2.1529	0.859533	0.842661	6972	True
GO:0071470	"cellular response to osmotic stress"	0.0217608	null	null	3.72173	-2.01053	0.844562	0.901551	6972	True
GO:0021988	"olfactory lobe development"	0.00574587	1.02928	-0.690618	3.14364	-2.01053	0.9321	0	null	False
GO:0021884	"forebrain neuron development"	0.00445707	null	null	3.03342	-1.42818	0.923003	0.744548	21988	True
GO:0021761	"limbic system development"	0.0156679	null	null	3.5791	-1.55874	0.928925	0.795072	21988	True
GO:0021537	"telencephalon development"	0.0360366	null	null	3.94077	-1.45058	0.92613	0.882539	21988	True
GO:0070839	"metal ion export"	0.0172748	-1.01225	-5.92207	3.62149	-2.01494	0.959058	0	null	False
GO:1904951	"positive regulation of establishment of protein localization"	0.0509114	-5.37883	3.81492	4.09082	-2.16612	0.67305	0	null	False
GO:0050796	"regulation of insulin secretion"	0.0261476	null	null	3.80147	-1.64256	0.664632	0.877738	1904951	True
GO:0035774	"positive regulation of insulin secretion involved in cellular response to glucose stimulus"	0.00529562	null	null	3.10823	-1.34424	0.657146	0.891393	1904951	True
GO:0050708	"regulation of protein secretion"	0.0428482	null	null	4.01595	-1.78169	0.689662	0.906002	1904951	True
GO:0051222	"positive regulation of protein transport"	0.0477969	null	null	4.06341	-1.75402	0.659906	0.912504	1904951	True
GO:0090316	"positive regulation of intracellular protein transport"	0.02597	null	null	3.79851	-1.35596	0.668689	0.953214	1904951	True
GO:0090276	"regulation of peptide hormone secretion"	0.0313565	null	null	3.88036	-1.51808	0.670034	0.986949	1904951	True
GO:0002791	"regulation of peptide secretion"	0.0317696	null	null	3.88604	-1.62928	0.700238	0.995569	1904951	True
GO:0007005	"mitochondrion organization"	0.360573	5.0325	-3.3381	4.94097	-2.15199	0.93041	0.0115075	null	False
GO:0006734	"NADH metabolic process"	0.061767	2.18306	-6.46968	4.17476	-3.33489	0.983918	0.0321048	null	False
GO:0019674	"NAD metabolic process"	0.11367	-0.0347378	-2.11214	4.43963	-1.61383	0.983117	0.0340269	null	False
GO:0016052	"carbohydrate catabolic process"	1.34421	2.6756	6.96679	5.51244	-1.91855	0.907747	0.0449185	null	False
GO:0046034	"ATP metabolic process"	1.40162	3.35839	-6.14922	5.5306	-2.38421	0.97876	0.0451633	null	False
GO:0015980	"energy derivation by oxidation of organic compounds"	1.41195	7.19085	-0.135345	5.53379	-3.33489	0.893713	0.0834404	null	False
GO:0045333	"cellular respiration"	1.19343	null	null	5.46077	-2.38421	0.887771	0.758523	15980	True
GO:0006099	"tricarboxylic acid cycle"	0.547167	null	null	5.12209	-2.28675	0.890938	0.871694	15980	True
GO:0009060	"aerobic respiration"	1.00545	null	null	5.38633	-1.73576	0.888477	0.930441	15980	True
GO:0009117	"nucleotide metabolic process"	4.07736	4.77735	3.50124	5.99435	-2.28675	0.753165	0.0968317	null	False
GO:0009132	"nucleoside diphosphate metabolic process"	0.69002	null	null	5.22284	-1.42818	0.791911	0.748957	9117	True
GO:0019693	"ribose phosphate metabolic process"	2.92249	null	null	5.84973	-2.02208	0.818672	0.756014	9117	True
GO:0006753	"nucleoside phosphate metabolic process"	4.1057	null	null	5.99736	-2.28675	0.764007	0.878019	9117	True
GO:0009150	"purine ribonucleotide metabolic process"	2.43526	null	null	5.77052	-2.15199	0.753628	0.885548	9117	True
GO:0009259	"ribonucleotide metabolic process"	2.87057	null	null	5.84194	-2.0548	0.754775	0.944012	9117	True
GO:0006163	"purine nucleotide metabolic process"	2.53504	null	null	5.78796	-2.0353	0.754922	0.952087	9117	True
GO:0051481	"negative regulation of cytosolic calcium ion concentration"	0.00111117	-1.21983	7.20355	2.43136	-1.62497	0.874731	0.118293	null	False
GO:0006874	"cellular calcium ion homeostasis"	0.114306	null	null	4.44206	-1.3402	0.841242	0.73963	51481	True
GO:0060251	"regulation of glial cell proliferation"	0.00305675	-2.86233	7.36423	2.86982	-1.38234	0.900273	0.134243	null	False
GO:0036336	"dendritic cell migration"	0.00323437	-2.21234	-3.77777	2.89432	-1.61383	0.94231	0.140258	null	False
GO:0006907	"pinocytosis"	0.00344091	-0.0649061	-6.52567	2.92117	-1.61383	0.96961	0.146009	null	False
GO:0010769	"regulation of cell morphogenesis involved in differentiation"	0.0144039	-2.06293	2.27453	3.54258	-1.48473	0.880416	0.14691	null	False
GO:0032409	"regulation of transporter activity"	0.0527744	-3.58209	6.10849	4.10643	-1.85278	0.859087	0.148477	null	False
GO:0060491	"regulation of cell projection assembly"	0.0548852	-3.82642	3.52621	4.12346	-1.62497	0.844382	0.159933	null	False
GO:1902115	"regulation of organelle assembly"	0.0686158	null	null	4.22042	-1.61383	0.842853	0.725095	60491	True
GO:0120032	"regulation of plasma membrane bounded cell projection assembly"	0.0362101	null	null	3.94285	-1.62928	0.847836	0.869296	60491	True
GO:0009306	"protein secretion"	0.397712	-2.31838	-5.77656	4.98355	-1.52382	0.920501	0.194881	null	False
GO:0030073	"insulin secretion"	0.00894719	null	null	3.33586	-1.51975	0.792391	0.741416	9306	True
GO:0030072	"peptide hormone secretion"	0.0121444	null	null	3.4685	-1.35596	0.801144	0.97964	9306	True
GO:0035592	"establishment of protein localization to extracellular region"	0.397968	null	null	4.98382	-1.52382	0.942634	0.995416	9306	True
GO:0104004	"cellular response to environmental stimulus"	0.102314	-5.48189	-3.55613	4.39393	-2.28675	0.938193	0.211431	null	False
GO:0006103	"2-oxoglutarate metabolic process"	0.0186544	4.67862	5.98605	3.65485	-1.76639	0.903418	0.261618	null	False
GO:0007264	"small GTPase mediated signal transduction"	0.257304	-5.02414	0.226994	4.79443	-1.42818	0.806588	0.301779	null	False
GO:0002026	"regulation of the force of heart contraction"	0.00356896	-1.62374	5.62707	2.93702	-1.48819	0.851091	0.319273	null	False
GO:0086004	"regulation of cardiac muscle cell contraction"	0.00427532	null	null	3.01536	-1.42345	0.72987	0.786127	2026	True
GO:0072521	"purine-containing compound metabolic process"	2.69093	3.75073	0.810516	5.81388	-2.01053	0.905723	0.347947	null	False
GO:1901068	"guanosine-containing compound metabolic process"	0.000937679	5.44652	3.90269	2.35793	-1.42345	0.868721	0.37983	null	False
GO:0006090	"pyruvate metabolic process"	0.818338	4.29254	5.26782	5.29691	-1.45058	0.854914	0.385189	null	False
GO:1901660	"calcium ion export"	0.0015986	-0.656318	-5.53272	2.58883	-1.93493	0.959933	0.394194	null	False
GO:0070588	"calcium ion transmembrane transport"	0.195326	null	null	4.67474	-1.35596	0.942581	0.704504	1901660	True
GO:0042391	"regulation of membrane potential"	0.10559	-2.27851	5.63257	4.40761	-1.40565	0.853244	0.404333	null	False
GO:0046939	"nucleotide phosphorylation"	0.594844	6.50036	1.85493	5.15838	-1.51724	0.882549	0.405515	null	False
GO:0002888	"positive regulation of myeloid leukocyte mediated immunity"	0.00246605	-6.65491	1.86332	2.7767	-1.51724	0.853456	0.415158	null	False
GO:0030388	"fructose 1	6-bisphosphate metabolic process"	0.0141519	6.6258	2.65426	3.53491	-1.89529	0.883566	0.421944	null	False
GO:0043552	"positive regulation of phosphatidylinositol 3-kinase activity"	0.00413488	-5.5561	2.54212	3.00087	-1.5032	0.802128	0.427296	null	False
GO:0090218	"positive regulation of lipid kinase activity"	0.00535758	null	null	3.11327	-1.43541	0.799664	0.882531	43552	True
GO:0043551	"regulation of phosphatidylinositol 3-kinase activity"	0.0122848	null	null	3.47349	-1.38234	0.837953	0.933542	43552	True
GO:0006007	"glucose catabolic process"	0.0286385	3.37255	6.13654	3.84098	-1.85278	0.865943	0.438068	null	False
GO:0019320	"hexose catabolic process"	0.0639398	null	null	4.18977	-1.61383	0.858573	0.825071	6007	True
GO:0051017	"actin filament bundle assembly"	0.030741	4.35959	-3.7474	3.87175	-1.77661	0.915763	0.438329	null	False
GO:0061572	"actin filament bundle organization"	0.0330666	null	null	3.90342	-1.76639	0.919423	0.766588	51017	True
GO:0007015	"actin filament organization"	0.206124	null	null	4.69811	-1.42345	0.911306	0.806164	51017	True
GO:0045740	"positive regulation of DNA replication"	0.00812931	-6.12923	2.3239	3.29425	-1.30394	0.839302	0.444288	null	False
GO:0032981	"mitochondrial respiratory chain complex I assembly"	0.0391636	5.19494	-3.63386	3.9769	-2.01494	0.929882	0.446209	null	False
GO:0033108	"mitochondrial respiratory chain complex assembly"	0.0902403	null	null	4.33939	-1.64256	0.926474	0.754589	32981	True
GO:0006002	"fructose 6-phosphate metabolic process"	0.0619323	6.21615	2.44329	4.17592	-1.85278	0.870714	0.48078	null	False
GO:0071346	"cellular response to interferon-gamma"	0.0118924	-4.91243	-2.62264	3.45939	-1.5032	0.904162	0.482045	null	False
GO:0034341	"response to interferon-gamma"	0.0152548	null	null	3.5675	-1.38234	0.914038	0.73533	71346	True
GO:0000723	"telomere maintenance"	0.125306	4.94697	-1.95041	4.48196	-1.42913	0.86473	0.488374	null	False
GO:0006120	"mitochondrial electron transport	NADH to ubiquinone"	0.0247679	7.1025	-0.307053	3.77793	-1.61383	0.908054	0.524568	null	False
GO:0035725	"sodium ion transmembrane transport"	0.226712	-1.24323	-5.68011	4.73945	-1.34424	0.94581	0.526579	null	False
GO:1903975	"regulation of glial cell migration"	0.00199928	-5.23268	5.40857	2.68574	-1.61383	0.758611	0.533001	null	False
GO:0048548	"regulation of pinocytosis"	0.00230909	-5.15512	4.68795	2.74819	-1.85278	0.725061	0.537206	null	False
GO:0045807	"positive regulation of endocytosis"	0.0167873	null	null	3.60906	-1.42818	0.664103	0.815279	48548	True
GO:0032212	"positive regulation of telomere maintenance via telomerase"	0.00812931	-5.7662	2.80142	3.29425	-1.47443	0.8085	0.539991	null	False
GO:1904358	"positive regulation of telomere maintenance via telomere lengthening"	0.00854651	null	null	3.31597	-1.42818	0.808687	0.964253	32212	True
GO:0010257	"NADH dehydrogenase complex assembly"	0.0401715	5.00975	-3.8362	3.98793	-2.01494	0.938361	0.556321	null	False
GO:0035308	"negative regulation of protein dephosphorylation"	0.012322	-4.08587	1.96157	3.4748	-1.42818	0.844483	0.563004	null	False
GO:0032200	"telomere organization"	0.12631	5.33797	-3.27362	4.48542	-1.42818	0.933305	0.565973	null	False
GO:0046039	"GTP metabolic process"	0.0565499	5.01197	3.30363	4.13644	-1.55874	0.820109	0.573487	null	False
GO:0061615	"glycolytic process through fructose-6-phosphate"	0.0651955	4.88176	3.72179	4.19822	-1.85278	0.720685	0.581231	null	False
GO:0006096	"glycolytic process"	0.532804	null	null	5.11054	-1.61383	0.672441	0.828393	61615	True
GO:0009135	"purine nucleoside diphosphate metabolic process"	0.584657	null	null	5.15088	-1.52382	0.75903	0.952496	61615	True
GO:0009185	"ribonucleoside diphosphate metabolic process"	0.587421	null	null	5.15292	-1.51577	0.758934	0.961539	61615	True
GO:0046031	"ADP metabolic process"	0.543176	null	null	5.11892	-1.55874	0.752432	0.978319	61615	True
GO:0006165	"nucleoside diphosphate phosphorylation"	0.594084	null	null	5.15782	-1.52382	0.75561	0.983361	61615	True
GO:0009179	"purine ribonucleoside diphosphate metabolic process"	0.584653	null	null	5.15087	-1.52382	0.757113	0.987089	61615	True
GO:0006757	"ATP generation from ADP"	0.532961	null	null	5.11067	-1.61383	0.7122	0.990933	61615	True
GO:0061620	"glycolytic process through glucose-6-phosphate"	0.00316828	4.79278	3.92491	2.88536	-1.99343	0.769705	0.588505	null	False
GO:0050767	"regulation of neurogenesis"	0.0562814	-1.86102	2.57984	4.13437	-1.85278	0.785676	0.601628	null	False
GO:0050769	"positive regulation of neurogenesis"	0.0328146	null	null	3.90009	-1.35014	0.744555	0.93321	50767	True
GO:0010720	"positive regulation of cell development"	0.0454134	null	null	4.0412	-1.58223	0.808159	0.934297	50767	True
GO:1903115	"regulation of actin filament-based movement"	0.00494863	-5.01578	5.24851	3.07882	-1.31279	0.747934	0.603753	null	False
GO:0051271	"negative regulation of cellular component movement"	0.0485528	null	null	4.07022	-1.30295	0.712758	0.713527	1903115	True
GO:0071692	"protein localization to extracellular region"	0.39915	-2.04898	-5.93071	4.98511	-1.51577	0.952931	0.61324	null	False
GO:0071214	"cellular response to abiotic stimulus"	0.102314	-5.99764	-2.99137	4.39393	-2.28675	0.852047	0.620357	null	False
GO:0006970	"response to osmotic stress"	0.0564012	null	null	4.13529	-2.28675	0.876761	0.711538	71214	True
GO:0071474	"cellular hyperosmotic response"	0.00203233	null	null	2.69285	-2.38421	0.85486	0.777656	71214	True
GO:0071472	"cellular response to salt stress"	0.00450251	null	null	3.03782	-2.38421	0.852794	0.814274	71214	True
GO:0071475	"cellular hyperosmotic salinity response"	0.000417205	null	null	2.0086	-2.38421	0.864555	0.827156	71214	True
GO:0071480	"cellular response to gamma radiation"	0.00647701	null	null	3.19562	-1.52382	0.864104	0.832186	71214	True
GO:0071479	"cellular response to ionizing radiation"	0.0143956	null	null	3.54233	-1.85278	0.858705	0.874437	71214	True
GO:0042538	"hyperosmotic salinity response"	0.0029287	null	null	2.85126	-2.38421	0.867915	0.903038	71214	True
GO:0044282	"small molecule catabolic process"	1.67652	3.60233	5.62115	5.60838	-1.72752	0.850255	0.628782	null	False
GO:0046365	"monosaccharide catabolic process"	0.164457	3.47561	5.90099	4.60004	-1.55874	0.851961	0.634116	null	False
GO:0032412	"regulation of ion transmembrane transporter activity"	0.0487758	-4.59465	4.82065	4.07221	-1.89928	0.67201	0.644954	null	False
GO:0051051	"negative regulation of transport"	0.0704292	null	null	4.23175	-1.30494	0.701161	0.710684	32412	True
GO:0002028	"regulation of sodium ion transport"	0.0146228	null	null	3.54913	-1.61383	0.711208	0.723311	32412	True
GO:0043271	"negative regulation of ion transport"	0.0206	null	null	3.69793	-1.61383	0.703112	0.738695	32412	True
GO:1904062	"regulation of cation transmembrane transport"	0.0656582	null	null	4.20129	-1.57784	0.691019	0.815762	32412	True
GO:0034766	"negative regulation of ion transmembrane transport"	0.0155894	null	null	3.57692	-1.38952	0.699923	0.840758	32412	True
GO:0034763	"negative regulation of transmembrane transport"	0.0210709	null	null	3.70774	-1.38719	0.700316	0.855701	32412	True
GO:2000649	"regulation of sodium ion transmembrane transporter activity"	0.0105169	null	null	3.40603	-1.94192	0.689685	0.903703	32412	True
GO:1901019	"regulation of calcium ion transmembrane transporter activity"	0.0153622	null	null	3.57054	-1.62928	0.683803	0.924575	32412	True
GO:1901020	"negative regulation of calcium ion transmembrane transporter activity"	0.00729076	null	null	3.24699	-1.48819	0.684017	0.927792	32412	True
GO:1903170	"negative regulation of calcium ion transmembrane transport"	0.00874892	null	null	3.32613	-1.34424	0.699629	0.963677	32412	True
GO:1902305	"regulation of sodium ion transmembrane transport"	0.0116776	null	null	3.45148	-1.85278	0.707298	0.969416	32412	True
GO:0022898	"regulation of transmembrane transporter activity"	0.0506264	null	null	4.08838	-1.85278	0.674074	0.991566	32412	True
GO:0002218	"activation of innate immune response"	0.0118718	-5.74507	1.33205	3.45864	-1.38952	0.821018	0.656261	null	False
GO:0072329	"monocarboxylic acid catabolic process"	0.323516	3.78845	5.84528	4.89387	-1.47867	0.837938	0.662042	null	False
GO:0009062	"fatty acid catabolic process"	0.13498	null	null	4.51426	-1.58223	0.848341	0.721967	72329	True
GO:0030048	"actin filament-based movement"	0.0181257	1.69039	-4.20473	3.64237	-1.42549	0.955909	0.664974	null	False
GO:0046883	"regulation of hormone secretion"	0.0401054	-3.84193	5.13263	3.98722	-1.30827	0.67098	0.684778	null	False
GO:0010212	"response to ionizing radiation"	0.0334756	-6.23939	-2.89464	3.90875	-1.42818	0.879019	0.686604	null	False
GO:0048813	"dendrite morphogenesis"	0.0111902	3.7586	-2.66103	3.43297	-1.68273	0.889293	0.691688	null	False
GO:0060996	"dendritic spine development"	0.00406052	null	null	2.993	-1.42818	0.89468	0.886457	48813	True
GO:0002790	"peptide secretion"	0.0125492	-2.84075	-5.78638	3.48273	-1.42818	0.952239	0.693309	null	False
GO:0010165	"response to X-ray"	0.00669594	-6.37476	-2.72195	3.21005	-1.57092	0.882844	0.697355	null	False

## Sheet: CC
TermID	Name	Frequency	PlotX	PlotY	LogSize	Value	Uniqueness	Dispensability	Representative	Eliminated
GO:0005743	"mitochondrial inner membrane"	0.954275	-5.56048	-0.432095	5.28247	-3.94113	0.584368	0	null	False
GO:0098798	"mitochondrial protein-containing complex"	0.456741	null	null	4.96247	-3.88585	0.574189	0.703474	5743	True
GO:0005747	"mitochondrial respiratory chain complex I"	0.0347133	null	null	3.84336	-2.52912	0.498629	0.717156	5743	True
GO:0005746	"mitochondrial respirasome"	0.135487	null	null	4.43471	-2.11018	0.555512	0.803917	5743	True
GO:0098803	"respiratory chain complex"	0.220141	null	null	4.64551	-2.08654	0.720227	0.846732	5743	True
GO:0019866	"organelle inner membrane"	1.03401	null	null	5.31733	-3.90507	0.663669	0.85119	5743	True
GO:0098800	"inner mitochondrial membrane protein complex"	0.292013	null	null	4.76821	-1.67205	0.505025	0.862779	5743	True
GO:0045271	"respiratory chain complex I"	0.0358138	null	null	3.85691	-2.52912	0.707299	0.989532	5743	True
GO:1990204	"oxidoreductase complex"	0.480389	0.809134	-6.72709	4.9844	-3.6123	0.806916	0	null	False
GO:0014704	"intercalated disc"	0.0073251	0.591004	5.88261	3.16791	-2.34721	0.931639	2.035e-05	null	False
GO:0043209	"myelin sheath"	0.0123048	4.40163	0.583366	3.39305	-2.60492	0.999966	2.112e-05	null	False
GO:0009295	"nucleoid"	0.141438	5.58486	-1.34839	4.45338	-1.53404	0.999961	2.573e-05	null	False
GO:0042383	"sarcolemma"	0.0416052	5.12398	-3.89059	3.922	-1.4696	0.987191	0.0264642	null	False
GO:0070469	"respirasome"	0.446921	4.60765	2.82315	4.95303	-2.04598	0.984884	0.0327081	null	False
GO:0030018	"Z disc"	0.0277667	-6.32882	-4.0983	3.7464	-3.44258	0.666387	0.163235	null	False
GO:0031674	"I band"	0.0313471	null	null	3.79906	-3.31643	0.664342	0.904595	30018	True
GO:0030017	"sarcomere"	0.0637697	null	null	4.10745	-2.7378	0.652773	0.93605	30018	True
GO:0030016	"myofibril"	0.0728327	null	null	4.16516	-2.60492	0.650778	0.985871	30018	True
GO:0016528	"sarcoplasm"	0.033075	-5.04743	4.53285	3.82236	-2.07841	0.847169	0.16546	null	False
GO:0016529	"sarcoplasmic reticulum"	0.025974	-6.98316	2.20402	3.71742	-2.15121	0.812834	0.210758	null	False
GO:0045335	"phagocytic vesicle"	0.0324177	-4.41688	2.15033	3.81365	-1.84386	0.81028	0.21444	null	False
GO:0000242	"pericentriolar material"	0.00486514	-5.814	-5.63176	2.99034	-2.04598	0.794342	0.246692	null	False
GO:0005777	"peroxisome"	0.280734	-7.03909	0.444574	4.7511	-1.56997	0.781431	0.258412	null	False
GO:0042579	"microbody"	0.280734	-4.08997	0.384749	4.7511	-1.56997	0.781431	0.258412	null	False
GO:0045239	"tricarboxylic acid cycle enzyme complex"	0.0764778	-1.04373	-3.89068	4.18636	-2.34721	0.737853	0.296591	null	False
GO:1990391	"DNA repair complex"	0.217811	1.51499	-6.13441	4.64089	-1.71211	0.848956	0.32366	null	False
GO:0030964	"NADH dehydrogenase complex"	0.0382041	0.577757	-7.22035	3.88497	-2.52912	0.776637	0.486895	null	False
GO:0005871	"kinesin complex"	0.0354553	-3.12336	-5.02948	3.85254	-1.4696	0.679956	0.501767	null	False
GO:0043197	"dendritic spine"	0.0245	1.31938	5.39757	3.69205	-2.04598	0.895523	0.524743	null	False
GO:0044309	"neuron spine"	0.0251175	null	null	3.70286	-2.02512	0.957567	0.707164	43197	True
GO:0042645	"mitochondrial nucleoid"	0.0309835	-6.02931	-2.03424	3.794	-1.53404	0.660458	0.554802	null	False
GO:0043292	"contractile fiber"	0.0751383	-5.88724	-3.71396	4.17869	-2.52912	0.697909	0.621564	null	False
GO:0044291	"cell-cell contact zone"	0.0117321	0.930675	5.67437	3.37236	-2.06994	0.930805	0.622679	null	False
GO:0005759	"mitochondrial matrix"	0.359358	-6.00469	-0.319488	4.85833	-2.34721	0.665128	0.687065	null	False

## Sheet: MF
TermID	Name	Frequency	PlotX	PlotY	LogSize	Value	Uniqueness	Dispensability	Representative	Eliminated
GO:0016208	"AMP binding"	0.0311438	3.38965	5.57765	3.96398	-4.83565	0.859336	0	null	False
GO:0019200	"carbohydrate kinase activity"	0.226565	0.551064	-2.3337	4.82576	-1.69483	0.981148	0	null	False
GO:0016887	"ATP hydrolysis activity"	0.803005	-3.50257	-5.65172	5.37528	-1.69483	0.837858	0.0317126	null	False
GO:0003924	"GTPase activity"	1.21689	null	null	5.55581	-1.69483	0.92617	0.82403	16887	True
GO:0044325	"transmembrane transporter binding"	0.0162843	-5.14094	1.3503	3.68242	-2.73708	0.800098	0.0325487	null	False
GO:0016616	"oxidoreductase activity	acting on the CH-OH group of donors	NAD or NADP as acceptor"	1.64876	1.5147	-6.13926	5.68772	-1.39374	0.953462	0.0387612	null	False
GO:0030246	"carbohydrate binding"	0.793279	6.54037	2.64461	5.36999	-1.45576	0.938319	0.0423452	null	False
GO:0003746	"translation elongation factor activity"	0.328717	5.0069	-1.30471	4.98738	-1.69483	0.855432	0.0830652	null	False
GO:0001882	"nucleoside binding"	0.0530998	2.20173	6.61196	4.19568	-1.87442	0.86063	0.192123	null	False
GO:0042162	"telomeric DNA binding"	0.0360981	4.73486	-3.79206	4.02808	-1.50837	0.906352	0.194764	null	False
GO:0032549	"ribonucleoside binding"	0.0523418	0.513888	6.88943	4.18943	-1.69483	0.785967	0.198731	null	False
GO:0001883	"purine nucleoside binding"	0.000307953	null	null	1.96379	-1.69483	0.824554	0.744522	32549	True
GO:0005525	"GTP binding"	1.81585	2.04828	5.33664	5.72964	-1.69483	0.776509	0.259756	null	False
GO:0032561	"guanyl ribonucleotide binding"	1.87518	null	null	5.7436	-1.69483	0.77609	0.974065	5525	True
GO:0030374	"nuclear receptor coactivator activity"	0.0134619	6.17993	-0.0901018	3.59977	-1.32552	0.980744	0.261217	null	False
GO:0030742	"GTP-dependent protein binding"	0.00247377	-6.06184	0.547472	2.86451	-1.69483	0.817542	0.306296	null	False
GO:0097110	"scaffold protein binding"	0.00798984	-5.27189	3.19035	3.37328	-1.69483	0.807027	0.326073	null	False
GO:0051087	"chaperone binding"	0.10358	-5.32296	2.25743	4.48585	-1.69483	0.780007	0.379645	null	False
GO:0042826	"histone deacetylase binding"	0.0179492	-6.00581	3.04844	3.72469	-1.50837	0.799117	0.382029	null	False
GO:0016922	"nuclear receptor binding"	0.0211641	-6.4696	1.37068	3.79623	-1.37577	0.797438	0.386134	null	False
GO:0008022	"protein C-terminus binding"	0.0257123	-6.40869	2.31925	3.88076	-1.6423	0.795423	0.3911	null	False
GO:0019001	"guanyl nucleotide binding"	1.89824	2.74786	4.56427	5.74891	-1.69483	0.82641	0.391563	null	False
GO:0003725	"double-stranded RNA binding"	0.0889272	4.56714	-2.3364	4.41961	-1.69483	0.885861	0.426461	null	False
GO:0031072	"heat shock protein binding"	0.106125	-5.8266	1.80183	4.49639	-1.38947	0.779724	0.431508	null	False
GO:0016614	"oxidoreductase activity	acting on CH-OH group of donors"	1.89992	1.01654	-6.24123	5.74929	-1.37577	0.953237	0.442888	null	False
GO:0032550	"purine ribonucleoside binding"	1.35364e-05	-0.684	7.57583	0.69897	-1.69483	0.843041	0.644982	null	False
GO:0008094	"ATPase	acting on DNA"	0.783553	-4.0858	-5.48206	5.36463	-1.32455	0.892193	0.658722	null	False
GO:0004386	"helicase activity"	1.26509	-3.79201	-5.56915	5.57268	-1.38947	0.88924	0.693043	null	False
